# Supplementary material for: The Alk receptor tyrosine kinase regulates Sparkly, a novel activity regulating neuropeptide precursor in the Drosophila central nervous system
Source: eLife. 2024 Jun 21;12:RP88985. doi: 10.7554/eLife.88985 (PMC11196111; doi:10.7554/eLife.88985)
Supplement: Supplementary file 1. — RNA-seq normalized read count data of CG4577 in control (w1118), AlkRA, and AlkY1355S conditions (Sheet 2). RNA-seq average normalized read count data of Spar in ventral lateral neuron (LNv), dorsal lateral neuron (LNd), and dorsal neuron 1 (DN1) clock neuronal cells (Sheet 3). SparΔExon1 mutant CRISPR single guide RNA target and screening primer information (Sheet 4). [file elife-88985-supp1.xlsx]

## Sheet: TaDa AlkDN downregulated genes
genes	seqnames	start	end	width	strand	gene	cluster	num.tests	num.up.logFC	num.down.logFC	pval	FDR	direction	meanLogFC	annotation	geneChr	geneStart	geneEnd	geneLength	geneStrand	geneId	transcriptId	distanceToTSS
CG12594	chr3R	11721744	11721746	3	*	CG12594	71353	1	0	1	1.08e-09	6.43e-07	down	-7.38714	Promoter (<=1kb)	4	11721734	11732479	10746	1	FBgn0037941	FBtr0335210	10
Hsp70Ba	chr3R	12467408	12467539	132	*	Hsp70Ba	71934	2	0	2	4.33e-10	6.43e-07	down	-7.08419	Promoter (<=1kb)	4	12465453	12467776	2324	2	FBgn0013277	FBtr0082679	237
lncRNA:CR43988	chr3L	72520	72601	82	*	lncRNA:CR43988	39281	2	0	2	4.16e-09	8.5e-07	down	-6.66648	Promoter (<=1kb)	3	72196	73101	906	2	FBgn0264720	FBtr0334095	500
Lsp1gamma	chr3L	68764	68911	148	*	Lsp1gamma	39277	2	0	2	1.26e-09	6.69e-07	down	-6.6038	Promoter (<=1kb)	3	69138	69894	757	1	FBgn0265703	FBtr0340637	-227
CG13405	chr3L	74277	74279	3	*	CG13405	39283	1	0	1	8.54e-10	6.43e-07	down	-6.53612	Promoter (<=1kb)	3	74486	75270	785	2	FBgn0035097	FBtr0072541	991
AspRS	chr2R	12880372	12880374	3	*	AspRS	29359	1	0	1	3.05e-09	7.91e-07	down	-6.34477	Promoter (<=1kb)	2	12880432	12883168	2737	1	FBgn0002069	FBtr0339391	-58
CG13760	chrX	2585116	2585316	201	*	CG13760	90876	2	0	2	7.07e-09	1.09e-06	down	-6.26993	Promoter (<=1kb)	6	2583745	2585380	1636	2	FBgn0040375	FBtr0308567	64
Hydr1	chr2R	9132374	9132571	198	*	Hydr1	26269	2	0	2	3.01e-09	7.91e-07	down	-6.12541	Promoter (<=1kb)	2	9132480	9135453	2974	1	FBgn0033382	FBtr0088580	0
CG15891	chrX	6294627	6294629	3	*	CG15891	93238	1	0	1	8.12e-06	4.25e-05	down	-6.04489	Promoter (<=1kb)	6	6293106	6294343	1238	2	FBgn0029859	FBtr0070926	-284
CG4238	chr2L	2012520	2012659	140	*	CG4238	1523	2	0	2	5.43e-09	9.65e-07	down	-6.03128	Promoter (<=1kb)	1	2013179	2013250	72	2	FBgn0051669	FBtr0077860	591
stet	chr3L	1488272	1488662	391	*	stet	40517	4	3	1	1.64e-08	1.53e-06	down	-6.00281	Promoter (<=1kb)	3	1488739	1488831	93	1	FBgn0263839	FBtr0321280	-77
lncRNA:CR44511	chr3L	70540	70542	3	*	lncRNA:CR44511	39279	1	0	1	2.71e-09	7.91e-07	down	-5.89843	Promoter (<=1kb)	3	70851	71396	546	1	FBgn0262680	FBtr0347235	-309
vimar	chr2R	6979108	6979110	3	*	vimar	24351	1	0	1	3.32e-09	8.06e-07	down	-5.82949	Promoter (<=1kb)	2	6979496	6980195	700	1	FBgn0265059	FBtr0336744	-386
snRNA:U1:95Cb	chr3R	23827845	23827901	57	*	snRNA:U1:95Cb	81269	2	0	2	8.22e-11	5.67e-07	down	-5.79617	Promoter (<=1kb)	4	23827870	23828033	164	1	FBgn0004186	FBtr0084488	0
CG14321	chr3R	17734170	17734449	280	*	CG14321	76179	3	0	3	2.64e-08	1.96e-06	down	-5.75869	Promoter (<=1kb)	4	17733598	17734381	784	1	FBgn0038540	FBtr0083511	572
Dgk	chr2R	7885451	7885453	3	*	Dgk	25103	1	0	1	2.88e-09	7.91e-07	down	-5.70251	Promoter (<=1kb)	2	7834812	7885982	51171	2	FBgn0085390	FBtr0308589	529
CG7044	chr3R	21101643	21101645	3	*	CG7044	78908	1	0	1	2.91e-09	7.91e-07	down	-5.67525	Promoter (<=1kb)	4	21098229	21101718	3490	2	FBgn0038854	FBtr0084035	73
beat-Ib	chr2L	15961925	15961927	3	*	beat-Ib	12292	1	0	1	3.61e-08	2.31e-06	down	-5.65254	Promoter (<=1kb)	1	15905134	15962435	57302	2	FBgn0028645	FBtr0080808	508
CG34355	chr3R	23828110	23828112	3	*	CG34355	81270	1	0	1	4.11e-11	5.53e-07	down	-5.49693	Promoter (<=1kb)	4	23827870	23828033	164	1	FBgn0004186	FBtr0084488	240
cpx	chr3R	4280839	4280973	135	*	cpx	65465	2	0	2	4.33e-10	6.43e-07	down	-5.40632	Promoter (<=1kb)	4	4280385	4301541	21157	1	FBgn0041605	FBtr0301769	454
CG2747	chr3R	8027132	8027134	3	*	CG2747	68478	1	0	1	2.63e-10	6.06e-07	down	-5.37827	Promoter (<=1kb)	4	8016210	8027174	10965	2	FBgn0037541	FBtr0335229	40
His4r	chr3R	14625774	14625776	3	*	His4r	73615	1	0	1	7.93e-10	6.43e-07	down	-5.35612	Promoter (<=1kb)	4	14625788	14626604	817	1	FBgn0013981	FBtr0082963	-12
CG17574	chr2R	12866946	12866948	3	*	CG17574	29341	1	0	1	8.4e-09	1.17e-06	down	-5.26105	Promoter (<=1kb)	2	12867609	12869783	2175	1	FBgn0266633	FBtr0344923	-661
Pli	chr3R	23889472	23889474	3	*	Pli	81301	1	0	1	5.68e-09	9.79e-07	down	-5.21666	Promoter (<=1kb)	4	23860162	23890052	29891	2	FBgn0025574	FBtr0112907	578
CG15482	chr2L	13211581	13211888	308	*	CG15482	10242	3	0	3	1.23e-10	5.67e-07	down	-5.16178	Promoter (<=1kb)	1	13210773	13211814	1042	2	FBgn0032483	FBtr0080487	0
DJ-1alpha	chr2R	13942568	13942570	3	*	DJ-1alpha	30155	1	0	1	2.73e-07	6.92e-06	down	-5.13722	Promoter (<=1kb)	2	13864237	13942110	77874	2	FBgn0013733	FBtr0304850	-458
CG30015	chr2R	10874594	10874660	67	*	CG30015	27679	2	0	2	2.66e-08	1.96e-06	down	-5.10799	Promoter (<=1kb)	2	10839102	10874771	35670	2	FBgn0050015	FBtr0088242	111
lncRNA:CR30009	chr2R	10263474	10263844	371	*	lncRNA:CR30009	27213	5	0	5	4.05e-08	2.46e-06	down	-5.0667	Promoter (<=1kb)	2	10261315	10263827	2513	2	FBgn0050009	FBtr0088361	0
MED17	chr3R	18189507	18189546	40	*	MED17	76530	2	1	1	4.55e-08	2.61e-06	down	-5.03997	Promoter (<=1kb)	4	18189072	18191265	2194	1	FBgn0038578	FBtr0083558	435
Cortactin	chr3R	21064247	21064335	89	*	Cortactin	78863	2	0	2	7.85e-10	6.43e-07	down	-5.01114	Promoter (<=1kb)	4	21061680	21064440	2761	2	FBgn0025865	FBtr0084039	105
snRNA:U1:95Ca	chr3R	23859600	23859602	3	*	snRNA:U1:95Ca	81283	1	0	1	9.61e-11	5.67e-07	down	-5.00986	Promoter (<=1kb)	4	23859467	23859630	164	2	FBgn0004185	FBtr0084528	28
CG42402	chr3R	4083782	4083784	3	*	CG42402	65292	1	0	1	1.52e-10	5.67e-07	down	-4.91942	Promoter (<=1kb)	4	4084036	4104326	20291	1	FBgn0259821	FBtr0301942	-252
lncRNA:CR45973	chr3L	20404898	20404900	3	*	lncRNA:CR45973	55166	1	0	1	2.18e-08	1.76e-06	down	-4.89242	Promoter (<=1kb)	3	20404270	20407558	3289	1	FBgn0267635	FBtr0347090	628
pigs	chrX	6600118	6600120	3	*	pigs	93421	1	0	1	3.93e-09	8.32e-07	down	-4.8871	Promoter (<=1kb)	6	6600062	6653015	52954	1	FBgn0029881	FBtr0343375	56
Shab	chr3L	2895932	2895934	3	*	Shab	41658	1	0	1	3.69e-10	6.43e-07	down	-4.87794	Promoter (<=1kb)	3	2896743	2946408	49666	1	FBgn0262593	FBtr0305207	-809
Lsp1beta	chr2L	901227	901229	3	*	Lsp1beta	763	1	0	1	1.08e-08	1.26e-06	down	-4.72464	Promoter (<=1kb)	1	901491	901654	164	2	FBgn0003916	FBtr0078028	425
sna	chr2L	15477979	15478206	228	*	sna	11983	6	0	6	1.33e-08	1.38e-06	down	-4.68583	Promoter (<=1kb)	1	15476593	15478260	1668	2	FBgn0003448	FBtr0080739	54
CG33229	chr3L	223983	223985	3	*	CG33229	39396	1	0	1	2.09e-09	7.57e-07	down	-4.68043	Promoter (<=1kb)	3	224106	225605	1500	1	FBgn0053229	FBtr0072499	-121
flr	chr3L	13412833	13413021	189	*	flr	49834	2	0	2	5.95e-09	9.98e-07	down	-4.66501	Promoter (<=1kb)	3	13412843	13416453	3611	1	FBgn0260049	FBtr0075845	0
CCT5	chr2R	12174828	12174830	3	*	CCT5	28665	1	0	1	2.38e-07	6.37e-06	down	-4.62213	Promoter (<=1kb)	2	12174802	12177516	2715	1	FBgn0010621	FBtr0087987	26
snoRNA:Or-CD1	chr2R	22197014	22197353	340	*	snoRNA:Or-CD1	36578	4	0	4	5.67e-09	9.79e-07	down	-4.61372	Promoter (<=1kb)	2	22197269	22197374	106	2	FBgn0086027	FBtr0114303	21
Swim	chr2R	22197014	22197353	340	*	Swim	36578	4	0	4	5.67e-09	9.79e-07	down	-4.61372	Promoter (<=1kb)	2	22197269	22197374	106	2	FBgn0086027	FBtr0114303	21
Bsg	chr2L	8083549	8083551	3	*	Bsg	6371	1	0	1	2.75e-09	7.91e-07	down	-4.58829	Promoter (<=1kb)	1	8083420	8116531	33112	1	FBgn0261822	FBtr0079568	129
alphaTub84B	chr3R	7087436	7087612	177	*	alphaTub84B	67745	5	0	5	4.64e-07	9.03e-06	down	-4.58331	Promoter (<=1kb)	4	7086599	7088839	2241	1	FBgn0003884	FBtr0081639	837
APC7	chrX	6599282	6599284	3	*	APC7	93420	1	0	1	3.32e-08	2.21e-06	down	-4.58302	Promoter (<=1kb)	6	6600062	6652098	52037	1	FBgn0029881	FBtr0070948	-778
lncRNA:CR45910	chr3R	25588994	25589128	135	*	lncRNA:CR45910	82748	2	0	2	4.25e-10	6.43e-07	down	-4.58139	Promoter (<=1kb)	4	25588859	25588958	100	2	FBgn0262319	FBtr0304485	-36
msi	chr3R	25588994	25589128	135	*	msi	82748	2	0	2	4.25e-10	6.43e-07	down	-4.58139	Promoter (<=1kb)	4	25588859	25588958	100	2	FBgn0262319	FBtr0304485	-36
ICA69	chr3L	21131534	21131584	51	*	ICA69	55823	2	0	2	1.73e-10	5.67e-07	down	-4.58052	Promoter (<=1kb)	3	21131446	21133310	1865	1	FBgn0037050	FBtr0078292	88
nerfin-1	chr3L	909500	909502	3	*	nerfin-1	40037	1	0	1	4.56e-09	8.9e-07	down	-4.54991	Promoter (<=1kb)	3	909112	912319	3208	1	FBgn0028999	FBtr0072592	388
eIF4A	chr2L	5981887	5981889	3	*	eIF4A	4643	1	0	1	6.1e-09	1.01e-06	down	-4.54423	Promoter (<=1kb)	1	5981764	5985909	4146	1	FBgn0001942	FBtr0307068	123
CG12093	chr3L	2773281	2773283	3	*	CG12093	41587	1	0	1	2.05e-07	5.86e-06	down	-4.53424	Promoter (<=1kb)	3	2772560	2774007	1448	2	FBgn0035372	FBtr0073015	724
lncRNA:CR46006	chr3L	10326905	10326907	3	*	lncRNA:CR46006	47374	1	0	1	3.05e-09	7.91e-07	down	-4.4838	Promoter (<=1kb)	3	10326765	10367450	40686	1	FBgn0267668	FBtr0347138	140
pit	chr3R	22035868	22035870	3	*	pit	79730	1	0	1	8.18e-08	3.58e-06	down	-4.48378	Promoter (<=1kb)	4	22035717	22038925	3209	1	FBgn0266581	FBtr0346345	151
toy	chr4	989828	989947	120	*	toy	88524	2	0	2	8.87e-10	6.43e-07	down	-4.47937	Promoter (<=1kb)	5	989725	1007922	18198	1	FBgn0019650	FBtr0339509	103
Ldh	chr3L	6261850	6261852	3	*	Ldh	44216	1	0	1	2.17e-10	5.67e-07	down	-4.44993	Promoter (<=1kb)	3	6259492	6261160	1669	2	FBgn0001258	FBtr0332067	-690
lncRNA:CR44411	chr2L	17588493	17588495	3	*	lncRNA:CR44411	13425	1	0	1	3.89e-08	2.42e-06	down	-4.44664	Promoter (<=1kb)	1	17588203	17588670	468	2	FBgn0265584	FBtr0344799	175
RpII215	chrX	11569203	11569382	180	*	RpII215	96709	3	0	3	1.13e-07	4.22e-06	down	-4.43319	Promoter (<=1kb)	6	11562800	11570326	7527	2	FBgn0003277	FBtr0073542	944
CG4577	chr2L	1134739	1134912	174	*	CG4577	947	2	0	2	2.57e-09	7.91e-07	down	-4.42844	Promoter (<=1kb)	1	1134693	1141156	6464	1	FBgn0031306	FBtr0332271	46
Octbeta1R	chr3R	22497780	22497782	3	*	Octbeta1R	80072	1	0	1	1.6e-08	1.52e-06	down	-4.40788	Promoter (<=1kb)	4	22497215	22520078	22864	1	FBgn0038980	FBtr0331930	565
lncRNA:CR42721	chr3R	6767062	6767064	3	*	lncRNA:CR42721	67521	1	0	1	2.46e-09	7.89e-07	down	-4.40266	Promoter (<=1kb)	4	6767050	6779728	12679	1	FBgn0261638	FBtr0303008	12
onecut	chr4	607448	607450	3	*	onecut	88177	1	0	1	8.05e-08	3.55e-06	down	-4.40246	Promoter (<=1kb)	5	598555	607649	9095	2	FBgn0028996	FBtr0089104	199
Stacl	chr2R	15425292	15425294	3	*	Stacl	31209	1	0	1	4.11e-11	5.53e-07	down	-4.39146	Promoter (<=1kb)	2	15425228	15471091	45864	1	FBgn0263980	FBtr0330010	64
snRNA:U2:34ABa	chr2L	13212090	13212092	3	*	snRNA:U2:34ABa	10243	1	0	1	4.11e-11	5.53e-07	down	-4.39043	Promoter (<=1kb)	1	13211925	13212116	192	2	FBgn0004191	FBtr0080486	24
Bacc	chr2L	2753500	2753673	174	*	Bacc	2033	2	0	2	3.73e-09	8.25e-07	down	-4.37395	Promoter (<=1kb)	1	2753233	2756663	3431	1	FBgn0031453	FBtr0077714	267
Dph1	chr3L	11696883	11696885	3	*	Dph1	48392	1	0	1	9.87e-09	1.22e-06	down	-4.37052	Promoter (<=1kb)	3	11693879	11696963	3085	2	FBgn0036194	FBtr0076130	78
lncRNA:CR45919	chr2L	17561757	17561792	36	*	lncRNA:CR45919	13404	2	0	2	9.57e-09	1.22e-06	down	-4.35522	Promoter (<=1kb)	1	17560813	17566551	5739	1	FBgn0267579	FBtr0346993	944
asRNA:CR45257	chr2L	8082828	8082946	119	*	asRNA:CR45257	6370	2	0	2	3.19e-08	2.18e-06	down	-4.32019	Promoter (<=1kb)	1	8082859	8083107	249	1	FBgn0266795	FBtr0345451	0
Mcr	chr2L	8082828	8082946	119	*	Mcr	6370	2	0	2	3.19e-08	2.18e-06	down	-4.32019	Promoter (<=1kb)	1	8082859	8083107	249	1	FBgn0266795	FBtr0345451	0
CG9281	chrX	15710434	15710451	18	*	CG9281	99442	2	0	2	2.71e-08	1.98e-06	down	-4.31033	Promoter (<=1kb)	6	15705806	15710539	4734	2	FBgn0030672	FBtr0074056	88
sick	chr2L	19812529	19812673	145	*	sick	14986	2	0	2	1.69e-08	1.56e-06	down	-4.30796	Promoter (<=1kb)	1	19812646	19812836	191	1	FBgn0003923	FBtr0081293	0
snRNA:U2:38ABb	chr2L	19812529	19812673	145	*	snRNA:U2:38ABb	14986	2	0	2	1.69e-08	1.56e-06	down	-4.30796	Promoter (<=1kb)	1	19812646	19812836	191	1	FBgn0003923	FBtr0081293	0
CG43340	chr2R	7623384	7623386	3	*	CG43340	24886	1	0	1	6.89e-07	1.12e-05	down	-4.30534	Promoter (<=1kb)	2	7623242	7651787	28546	1	FBgn0263077	FBtr0306936	142
lncRNA:CR44861	chr2L	15435804	15435806	3	*	lncRNA:CR44861	11936	1	0	1	3.98e-07	8.38e-06	down	-4.29692	Promoter (<=1kb)	1	15435747	15436320	574	1	FBgn0266155	FBtr0343731	57
Sema2b	chr2R	16398489	16398491	3	*	Sema2b	32095	1	0	1	3.25e-09	8.05e-07	down	-4.27898	Promoter (<=1kb)	2	16398923	16430763	31841	1	FBgn0264273	FBtr0100001	-432
insb	chr2R	17475307	17475386	80	*	insb	32903	2	0	2	1.73e-07	5.33e-06	down	-4.27851	Promoter (<=1kb)	2	17475214	17476067	854	2	FBgn0034224	FBtr0086953	681
Kap3	chrX	11339192	11339194	3	*	Kap3	96563	1	0	1	3.15e-08	2.16e-06	down	-4.27029	Promoter (<=1kb)	6	11334187	11338824	4638	2	FBgn0028421	FBtr0289954	-368
ph-p	chrX	2137637	2137781	145	*	ph-p	90457	3	0	3	1.23e-10	5.67e-07	down	-4.23833	Promoter (<=1kb)	6	2126210	2138371	12162	2	FBgn0004861	FBtr0345598	590
snoRNA:U3:54Ab	chr2R	17145635	17145967	333	*	snoRNA:U3:54Ab	32691	3	0	3	2.28e-08	1.81e-06	down	-4.22123	Promoter (<=1kb)	2	17145654	17145826	173	1	FBgn0065047	FBtr0091605	0
Hex-A	chrX	9586646	9586816	171	*	Hex-A	95437	4	0	4	7.55e-08	3.41e-06	down	-4.22061	Promoter (<=1kb)	6	9585890	9588401	2512	1	FBgn0001186	FBtr0071362	756
Trx-2	chr2L	9614102	9614104	3	*	Trx-2	7533	1	0	1	4.11e-11	5.53e-07	down	-4.2197	Promoter (<=1kb)	1	9613414	9616047	2634	1	FBgn0040070	FBtr0079840	688
Ncc69	chr3L	12391347	12391625	279	*	Ncc69	48991	3	0	3	1.39e-05	5.9e-05	down	-4.20135	Promoter (<=1kb)	3	12368646	12391444	22799	2	FBgn0036279	FBtr0075987	0
tap	chr3L	17359790	17360245	456	*	tap	52845	5	0	5	4.25e-08	2.51e-06	down	-4.19567	Promoter (<=1kb)	3	17359682	17361811	2130	1	FBgn0015550	FBtr0075216	108
CG14186	chr3L	20103664	20103682	19	*	CG14186	54862	2	0	2	2.14e-08	1.75e-06	down	-4.18558	Promoter (<=1kb)	3	20098084	20103827	5744	2	FBgn0036935	FBtr0074870	145
CG12084	chr3L	1495990	1496066	77	*	CG12084	40527	2	0	2	2.1e-07	5.94e-06	down	-4.17247	Promoter (<=1kb)	3	1490951	1496643	5693	2	FBgn0043458	FBtr0332656	577
7B2	chr3R	5377113	5377115	3	*	7B2	66385	1	0	1	3.65e-09	8.2e-07	down	-4.163	Promoter (<=1kb)	4	5376780	5377975	1196	1	FBgn0041707	FBtr0301640	333
CG2680	chrX	2707173	2707268	96	*	CG2680	90979	2	0	2	8.26e-08	3.59e-06	down	-4.15514	Promoter (<=1kb)	6	2706151	2707427	1277	2	FBgn0024995	FBtr0273279	159
VGlut	chr2L	2400710	2400788	79	*	VGlut	1796	2	0	2	1.76e-08	1.6e-06	down	-4.13909	Promoter (<=1kb)	1	2400751	2410662	9912	1	FBgn0031424	FBtr0307078	0
Aldh-III	chr2R	7474100	7474107	8	*	Aldh-III	24753	2	0	2	2.81e-06	2.3e-05	down	-4.13684	Promoter (<=1kb)	2	7466879	7474130	7252	2	FBgn0010548	FBtr0088993	23
dpr20	chr3L	856897	857311	415	*	dpr20	40000	4	0	4	4.61e-09	8.9e-07	down	-4.1245	Promoter (<=1kb)	3	852720	857248	4529	2	FBgn0035170	FBtr0072594	0
CG17778	chrX	495059	495061	3	*	CG17778	89135	1	0	1	4.63e-10	6.43e-07	down	-4.11634	Promoter (<=1kb)	6	494900	496369	1470	1	FBgn0023534	FBtr0070080	159
Gapdh2	chrX	15868430	15868548	119	*	Gapdh2	99594	2	0	2	7.52e-09	1.11e-06	down	-4.11084	Promoter (<=1kb)	6	15868211	15869661	1451	1	FBgn0001092	FBtr0332618	219
Nepl11	chr3R	4292336	4292338	3	*	Nepl11	65477	1	0	1	9.02e-10	6.43e-07	down	-4.1096	Promoter (<=1kb)	4	4291738	4304604	12867	1	FBgn0041605	FBtr0310614	598
Oda	chr2R	12174231	12174233	3	*	Oda	28663	1	0	1	5.36e-09	9.65e-07	down	-4.10321	Promoter (<=1kb)	2	12166576	12174264	7689	2	FBgn0014184	FBtr0088013	31
Antp	chr3R	6998843	6999116	274	*	Antp	67663	3	0	3	6.24e-09	1.02e-06	down	-4.09851	Promoter (<=1kb)	4	6896253	6999228	102976	2	FBgn0260642	FBtr0081647	112
fne	chrX	12939261	12939263	3	*	fne	97585	1	0	1	3.69e-10	6.43e-07	down	-4.09086	Promoter (<=1kb)	6	12938517	12950417	11901	1	FBgn0086675	FBtr0343650	744
PEK	chr3R	5463811	5463919	109	*	PEK	66465	2	0	2	0.000559735	0.000917221	down	-4.07052	Promoter (<=1kb)	4	5458563	5463895	5333	2	FBgn0037327	FBtr0330026	0
mmd	chrX	15972860	15972862	3	*	mmd	99684	1	0	1	5.44e-10	6.43e-07	down	-4.06542	Promoter (<=1kb)	6	15946936	15973067	26132	2	FBgn0259110	FBtr0307541	205
Col4a1	chr2L	5036672	5036951	280	*	Col4a1	3924	3	0	3	4.55e-10	6.43e-07	down	-4.05371	Promoter (<=1kb)	1	5037709	5040818	3110	1	FBgn0260451	FBtr0110984	-758
Rbp6	chr3L	17147387	17147389	3	*	Rbp6	52709	1	0	1	6.24e-08	3.07e-06	down	-4.04171	Promoter (<=1kb)	3	17058907	17147969	89063	2	FBgn0260943	FBtr0310005	580
CG4813	chr3R	22725583	22725585	3	*	CG4813	80279	1	0	1	5.86e-07	1.03e-05	down	-4.03894	Promoter (<=1kb)	4	22724884	22726414	1531	2	FBgn0039013	FBtr0084326	829
CG2875	chrX	3573601	3573603	3	*	CG2875	91491	1	0	1	8.81e-09	1.19e-06	down	-4.03801	Promoter (<=1kb)	6	3571456	3573622	2167	2	FBgn0029672	FBtr0333793	19
arg	chrX	522614	522616	3	*	arg	89166	1	0	1	2.12e-10	5.67e-07	down	-4.035	Promoter (<=1kb)	6	509235	523226	13992	2	FBgn0260400	FBtr0307173	610
elav	chrX	522614	522616	3	*	elav	89166	1	0	1	2.12e-10	5.67e-07	down	-4.035	Promoter (<=1kb)	6	509235	523226	13992	2	FBgn0260400	FBtr0307173	610
lncRNA:enrr	chrX	522614	522616	3	*	lncRNA:enrr	89166	1	0	1	2.12e-10	5.67e-07	down	-4.035	Promoter (<=1kb)	6	509235	523226	13992	2	FBgn0260400	FBtr0307173	610
CG42699	chrX	5764683	5764685	3	*	CG42699	92840	1	0	1	9.94e-08	3.94e-06	down	-4.02272	Promoter (<=1kb)	6	5764553	5789576	25024	1	FBgn0261610	FBtr0302921	130
rgr	chr2R	8600445	8600447	3	*	rgr	25779	1	0	1	8.59e-09	1.18e-06	down	-4.01839	Promoter (<=1kb)	2	8600415	8612295	11881	1	FBgn0267792	FBtr0339354	30
asRNA:CR43481	chr3L	9378897	9378945	49	*	asRNA:CR43481	46720	2	0	2	1.41e-08	1.4e-06	down	-4.01689	Promoter (<=1kb)	3	9377802	9379534	1733	2	FBgn0001227	FBtr0076495	589
Hsp67Ba	chr3L	9378897	9378945	49	*	Hsp67Ba	46720	2	0	2	1.41e-08	1.4e-06	down	-4.01689	Promoter (<=1kb)	3	9377802	9379534	1733	2	FBgn0001227	FBtr0076495	589
nej	chrX	9686801	9686992	192	*	nej	95503	3	0	3	4.95e-07	9.4e-06	down	-4.01142	Promoter (<=1kb)	6	9665442	9687066	21625	2	FBgn0261617	FBtr0302723	74
CG31475	chr3R	19181219	19181221	3	*	CG31475	77347	1	0	1	2.66e-09	7.91e-07	down	-4.01015	Promoter (<=1kb)	4	19180659	19201096	20438	1	FBgn0051475	FBtr0332539	560
CngA	chr2R	16259710	16259752	43	*	CngA	31966	2	0	2	8.94e-09	1.19e-06	down	-3.99664	Promoter (<=1kb)	2	16243145	16259805	16661	2	FBgn0261612	FBtr0302925	53
Neos	chr3L	7241882	7241917	36	*	Neos	44883	2	0	2	9.75e-09	1.22e-06	down	-3.99423	Promoter (<=1kb)	3	7241817	7243139	1323	1	FBgn0024542	FBtr0333367	65
CG2186	chrX	10857786	10857797	12	*	CG2186	96207	2	0	2	3.08e-07	7.39e-06	down	-3.98958	Promoter (<=1kb)	6	10857657	10863580	5924	1	FBgn0030243	FBtr0073381	129
lncRNA:CR45527	chrX	15973723	15973725	3	*	lncRNA:CR45527	99685	1	0	1	4.1e-10	6.43e-07	down	-3.98838	Promoter (<=1kb)	6	15973555	15973917	363	1	FBgn0267083	FBtr0346073	168
l(3)neo38	chr3R	11771654	11771656	3	*	l(3)neo38	71396	1	0	1	2.22e-09	7.57e-07	down	-3.98804	Promoter (<=1kb)	4	11768611	11771550	2940	2	FBgn0265276	FBtr0082533	-104
CG4456	chr3L	9372657	9372897	241	*	CG4456	46716	3	0	3	6.5e-10	6.43e-07	down	-3.98691	Promoter (<=1kb)	3	9372722	9373491	770	1	FBgn0001228	FBtr0303474	0
beat-Ic	chr2L	16004014	16004016	3	*	beat-Ic	12317	1	0	1	0.00033463	0.000600595	down	-3.98136	Promoter (<=1kb)	1	16003756	16004292	537	2	FBgn0264374	FBtr0332231	276
lncRNA:CR43826	chr2L	16004014	16004016	3	*	lncRNA:CR43826	12317	1	0	1	0.00033463	0.000600595	down	-3.98136	Promoter (<=1kb)	1	16003756	16004292	537	2	FBgn0264374	FBtr0332231	276
snRNA:U2:34ABb	chr2L	13215864	13215866	3	*	snRNA:U2:34ABb	10247	1	0	1	9.2e-11	5.67e-07	down	-3.97761	Promoter (<=1kb)	1	13215839	13216030	192	1	FBgn0004192	FBtr0080443	25
dlg1	chrX	11369666	11369668	3	*	dlg1	96588	1	0	1	1.98e-08	1.68e-06	down	-3.97064	Promoter (<=1kb)	6	11369665	11409776	40112	1	FBgn0001624	FBtr0112813	1
tau	chr3R	27656526	27656528	3	*	tau	84227	1	0	1	8.96e-09	1.19e-06	down	-3.96039	Promoter (<=1kb)	4	27650854	27656795	5942	2	FBgn0266579	FBtr0344744	267
futsch	chrX	1411839	1411841	3	*	futsch	89810	1	0	1	1.83e-09	7.57e-07	down	-3.95746	Promoter (<=1kb)	6	1411726	1453686	41961	1	FBgn0259108	FBtr0307597	113
CG42540	chr3L	4575423	4575425	3	*	CG42540	43022	1	0	1	1.59e-08	1.52e-06	down	-3.93808	Promoter (<=1kb)	3	4574964	4592295	17332	1	FBgn0260657	FBtr0304988	459
CG18809	chrX	19743781	19743933	153	*	CG18809	102461	4	0	4	4.74e-08	2.65e-06	down	-3.93718	Promoter (<=1kb)	6	19740537	19744048	3512	2	FBgn0031066	FBtr0308683	115
COX6B	chrX	19743781	19743933	153	*	COX6B	102461	4	0	4	4.74e-08	2.65e-06	down	-3.93718	Promoter (<=1kb)	6	19740537	19744048	3512	2	FBgn0031066	FBtr0308683	115
lola	chr2R	10535688	10535901	214	*	lola	27464	3	0	3	6.5e-10	6.43e-07	down	-3.93718	Promoter (<=1kb)	2	10531654	10535032	3379	2	FBgn0283521	FBtr0089362	-656
E(spl)m7-HLH	chr3R	26037092	26037277	186	*	E(spl)m7-HLH	83066	3	0	3	1.34e-08	1.38e-06	down	-3.92737	Promoter (<=1kb)	4	26037038	26038019	982	1	FBgn0002633	FBtr0084960	54
ATPsynC	chr3R	31218295	31218312	18	*	ATPsynC	86966	2	0	2	4.33e-10	6.43e-07	down	-3.92216	Promoter (<=1kb)	4	31216145	31218904	2760	2	FBgn0039830	FBtr0305122	592
Shaw	chr2L	3718235	3718237	3	*	Shaw	2829	1	0	1	2.95e-06	2.36e-05	down	-3.90689	Promoter (<=1kb)	1	3718185	3729145	10961	1	FBgn0003386	FBtr0332185	50
Lrp4	chrX	15911363	15911365	3	*	Lrp4	99620	1	0	1	2.63e-10	6.06e-07	down	-3.90394	Promoter (<=1kb)	6	15911367	15920570	9204	1	FBgn0030706	FBtr0340309	-2
snoRNA:lola-c	chr2R	10536977	10537360	384	*	snoRNA:lola-c	27467	5	0	5	4.93e-08	2.69e-06	down	-3.90034	Promoter (<=1kb)	2	10536950	10537120	171	2	FBgn0263482	FBtr0309781	0
snoRNA:lola-d	chr2R	10536977	10537360	384	*	snoRNA:lola-d	27467	5	0	5	4.93e-08	2.69e-06	down	-3.90034	Promoter (<=1kb)	2	10536950	10537120	171	2	FBgn0263482	FBtr0309781	0
ZC3H3	chr3L	8509372	8509489	118	*	ZC3H3	45892	2	0	2	7.77e-07	1.19e-05	down	-3.89886	Promoter (<=1kb)	3	8507469	8509763	2295	2	FBgn0035900	FBtr0076656	274
Eno	chr2L	1728202	1728204	3	*	Eno	1345	1	0	1	1.09e-09	6.43e-07	down	-3.8988	Promoter (<=1kb)	1	1724974	1728463	3490	2	FBgn0000579	FBtr0077907	259
CG6567	chr3R	10854378	10854380	3	*	CG6567	70680	1	0	1	1.25e-06	1.51e-05	down	-3.89449	Promoter (<=1kb)	4	10853374	10854451	1078	2	FBgn0037842	FBtr0113217	71
Eip74EF	chr3L	17575481	17575537	57	*	Eip74EF	53035	2	0	2	9.49e-08	3.88e-06	down	-3.89357	Promoter (<=1kb)	3	17558672	17576320	17649	2	FBgn0000567	FBtr0100411	783
lncRNA:CR44272	chr2R	7992074	7992282	209	*	lncRNA:CR44272	25209	3	0	3	5.45e-07	9.84e-06	down	-3.89301	Promoter (<=1kb)	2	7974115	7991862	17748	2	FBgn0033246	FBtr0339125	-212
CG12502	chr3L	866535	866537	3	*	CG12502	40001	1	0	1	1.07e-09	6.43e-07	down	-3.887	Promoter (<=1kb)	3	866500	871701	5202	1	FBgn0035171	FBtr0339892	35
CG4511	chr3R	10854741	10854743	3	*	CG4511	70681	1	0	1	6.23e-07	1.06e-05	down	-3.8831	Promoter (<=1kb)	4	10854745	10856412	1668	1	FBgn0037843	FBtr0302202	-2
Fie	chr3L	3893299	3893457	159	*	Fie	42396	2	0	2	2.29e-09	7.57e-07	down	-3.88143	Promoter (<=1kb)	3	3893056	3893330	275	2	FBgn0083987	FBtr0111039	0
snRNA:U11	chr3L	3893299	3893457	159	*	snRNA:U11	42396	2	0	2	2.29e-09	7.57e-07	down	-3.88143	Promoter (<=1kb)	3	3893056	3893330	275	2	FBgn0083987	FBtr0111039	0
nSyb	chr3L	1637579	1637581	3	*	nSyb	40641	1	0	1	8.06e-08	3.56e-06	down	-3.87659	Promoter (<=1kb)	3	1630348	1637612	7265	2	FBgn0013342	FBtr0331462	31
unc-4	chrX	17769552	17769601	50	*	unc-4	101050	2	0	2	9.59e-07	1.32e-05	down	-3.87355	Promoter (<=1kb)	6	17768569	17778708	10140	1	FBgn0024184	FBtr0340627	983
Mob4	chr2R	6696309	6696523	215	*	Mob4	24126	3	1	2	4.34e-05	0.000124694	down	-3.85792	Promoter (<=1kb)	2	6695114	6696661	1548	2	FBgn0259483	FBtr0086141	138
CG10384	chr2R	22455079	22455081	3	*	CG10384	36797	1	0	1	1.66e-07	5.2e-06	down	-3.84835	Promoter (<=1kb)	2	22454741	22472995	18255	1	FBgn0034731	FBtr0342992	338
26-29-p	chr3L	13994310	13994312	3	*	26-29-p	50191	1	0	1	4.54e-08	2.6e-06	down	-3.84807	Promoter (<=1kb)	3	13994231	13996571	2341	1	FBgn0250848	FBtr0075766	79
Atpalpha	chr3R	20958008	20958010	3	*	Atpalpha	78745	1	0	1	2.17e-10	5.67e-07	down	-3.84369	Promoter (<=1kb)	4	20957734	20975284	17551	1	FBgn0002921	FBtr0089516	274
sol	chrX	21350428	21350430	3	*	sol	103496	1	0	1	8.04e-08	3.55e-06	down	-3.84321	Promoter (<=1kb)	6	21350280	21357912	7633	1	FBgn0003464	FBtr0301583	148
Oli	chr2L	17589458	17589460	3	*	Oli	13427	1	0	1	5.02e-10	6.43e-07	down	-3.83153	Promoter (<=1kb)	1	17589402	17591267	1866	1	FBgn0032651	FBtr0303252	56
Mical	chr3R	10042551	10042817	267	*	Mical	70004	3	0	3	6.66e-10	6.43e-07	down	-3.82998	Promoter (<=1kb)	4	10018243	10042821	24579	2	FBgn0053208	FBtr0082206	4
mod(mdg4)	chr3R	21365595	21365597	3	*	mod(mdg4)	79122	1	0	1	1.05e-09	6.43e-07	down	-3.82911	Promoter (<=1kb)	4	21365609	21367978	2370	1	FBgn0261839	FBtr0303405	-12
asRNA:CR45396	chr3L	15142282	15142442	161	*	asRNA:CR45396	51044	2	0	2	1.52e-07	4.99e-06	down	-3.82004	Promoter (<=1kb)	3	15137738	15142592	4855	2	FBgn0286818	FBtr0075648	150
Pdi	chr3L	15142282	15142442	161	*	Pdi	51044	2	0	2	1.52e-07	4.99e-06	down	-3.82004	Promoter (<=1kb)	3	15137738	15142592	4855	2	FBgn0286818	FBtr0075648	150
ATPsyndelta	chrX	10213025	10213146	122	*	ATPsyndelta	95809	2	0	2	1.66e-07	5.21e-06	down	-3.81622	Promoter (<=1kb)	6	10212970	10217393	4424	1	FBgn0028342	FBtr0343981	55
CG17734	chr3R	11243913	11243915	3	*	CG17734	70952	1	0	1	7.28e-08	3.34e-06	down	-3.81462	Promoter (<=1kb)	4	11242208	11243999	1792	2	FBgn0037890	FBtr0082360	84
Deaf1	chr3L	19819383	19819385	3	*	Deaf1	54681	1	0	1	5.66e-08	2.92e-06	down	-3.80613	Promoter (<=1kb)	3	19819102	19829523	10422	1	FBgn0013799	FBtr0332726	281
Syn	chr3R	10190800	10190802	3	*	Syn	70133	1	0	1	9.61e-09	1.22e-06	down	-3.80057	Promoter (<=1kb)	4	10190689	10222442	31754	1	FBgn0004575	FBtr0100472	111
CG33932	chrX	19744203	19744572	370	*	CG33932	102462	3	0	3	1.11e-07	4.17e-06	down	-3.79745	Promoter (<=1kb)	6	19740537	19744335	3799	2	FBgn0031066	FBtr0074815	0
Rpp20	chrX	19744203	19744572	370	*	Rpp20	102462	3	0	3	1.11e-07	4.17e-06	down	-3.79745	Promoter (<=1kb)	6	19740537	19744335	3799	2	FBgn0031066	FBtr0074815	0
lncRNA:CR45911	chr3R	15420015	15420017	3	*	lncRNA:CR45911	74195	1	0	1	1.24e-09	6.69e-07	down	-3.79317	Promoter (<=1kb)	4	15417320	15420374	3055	2	FBgn0267571	FBtr0346982	357
CG4854	chr3R	20028307	20028444	138	*	CG4854	78114	3	1	2	2.94e-06	2.36e-05	down	-3.79172	Promoter (<=1kb)	4	20028058	20029561	1504	1	FBgn0038766	FBtr0083830	249
CG12531	chrX	19719489	19719491	3	*	CG12531	102426	1	0	1	2.45e-08	1.9e-06	down	-3.78844	Promoter (<=1kb)	6	19718923	19730199	11277	1	FBgn0031064	FBtr0335043	566
CG43778	chr2L	13331043	13331045	3	*	CG43778	10355	1	0	1	3.23e-09	8.05e-07	down	-3.78689	Promoter (<=1kb)	1	13301814	13331121	29308	2	FBgn0264308	FBtr0331503	76
lncRNA:CR46035	chr3R	17704162	17704164	3	*	lncRNA:CR46035	76151	1	0	1	2.43e-07	6.44e-06	down	-3.78568	Promoter (<=1kb)	4	17703695	17705581	1887	1	FBgn0267702	FBtr0347244	467
CG4829	chrX	16812088	16812090	3	*	CG4829	100334	1	0	1	2.83e-09	7.91e-07	down	-3.77984	Promoter (<=1kb)	6	16811699	16826494	14796	1	FBgn0030796	FBtr0112995	389
para	chrX	16532374	16532376	3	*	para	100097	1	0	1	5.38e-09	9.65e-07	down	-3.77435	Promoter (<=1kb)	6	16458867	16533096	74230	2	FBgn0285944	FBtr0303687	720
mir-10	chr3R	6809564	6809566	3	*	mir-10	67554	1	0	1	1.34e-07	4.68e-06	down	-3.7722	Promoter (<=1kb)	4	6809506	6809582	77	2	FBgn0262424	FBtr0304380	16
lncRNA:CR46349	chrX	4075217	4075361	145	*	lncRNA:CR46349	91784	4	0	4	8.42e-08	3.63e-06	down	-3.76636	Promoter (<=1kb)	6	4074961	4075428	468	2	FBgn0286029	FBtr0473380	67
CG31808	chr2L	16716031	16716033	3	*	CG31808	12778	1	0	1	2.17e-10	5.67e-07	down	-3.76183	Promoter (<=1kb)	1	16715961	16719635	3675	1	FBgn0086907	FBtr0335141	70
Cyt-c-d	chr2L	16716031	16716033	3	*	Cyt-c-d	12778	1	0	1	2.17e-10	5.67e-07	down	-3.76183	Promoter (<=1kb)	1	16715961	16719635	3675	1	FBgn0086907	FBtr0335141	70
CG18178	chr3L	9719053	9719055	3	*	CG18178	46970	1	0	1	3.17e-07	7.51e-06	down	-3.75759	Promoter (<=1kb)	3	9717786	9719063	1278	2	FBgn0036035	FBtr0331542	8
sti	chr3L	12507912	12508062	151	*	sti	49130	2	0	2	6.54e-08	3.15e-06	down	-3.75576	Promoter (<=1kb)	3	12505764	12507840	2077	2	FBgn0036294	FBtr0075971	-72
Mef2	chr2R	9930351	9930353	3	*	Mef2	26939	1	0	1	7.93e-10	6.43e-07	down	-3.75304	Promoter (<=1kb)	2	9916118	9929615	13498	2	FBgn0011656	FBtr0088446	-736
CG4538	chr3R	19903331	19903333	3	*	CG4538	78025	1	0	1	4.12e-07	8.55e-06	down	-3.75173	Promoter (<=1kb)	4	19898829	19903235	4407	2	FBgn0038745	FBtr0083855	-96
tth	chrX	13616292	13616471	180	*	tth	98029	4	0	4	5.61e-08	2.91e-06	down	-3.75081	Promoter (<=1kb)	6	13613193	13616403	3211	2	FBgn0030502	FBtr0073849	0
Hsp67Bc	chr3L	9372204	9372206	3	*	Hsp67Bc	46715	1	0	1	4.52e-10	6.43e-07	down	-3.75009	Promoter (<=1kb)	3	9371511	9372497	987	2	FBgn0001229	FBtr0076497	291
CG32683	chrX	10454753	10454775	23	*	CG32683	95955	2	0	2	6.03e-09	1.01e-06	down	-3.74638	Promoter (<=1kb)	6	10410391	10454895	44505	2	FBgn0052683	FBtr0071463	120
CG13891	chr3L	433806	433944	139	*	CG13891	39570	2	0	2	4.89e-07	9.34e-06	down	-3.74615	Promoter (<=1kb)	3	433146	433906	761	2	FBgn0035139	FBtr0072566	0
CG3253	chr2R	24114631	24114633	3	*	CG3253	38302	1	0	1	3.68e-07	8.08e-06	down	-3.74359	Promoter (<=1kb)	2	24114653	24116359	1707	1	FBgn0041706	FBtr0072251	-20
Dgp-1	chr2R	18172588	18172590	3	*	Dgp-1	33482	1	0	1	6.67e-08	3.19e-06	down	-3.74025	Promoter (<=1kb)	2	18168743	18172607	3865	2	FBgn0027836	FBtr0086773	17
CG32809	chrX	1692279	1692281	3	*	CG32809	90090	1	0	1	2.79e-09	7.91e-07	down	-3.7275	Promoter (<=1kb)	6	1675080	1692547	17468	2	FBgn0023531	FBtr0089815	266
LRP1	chr2R	8174681	8174683	3	*	LRP1	25395	1	0	1	1.52e-10	5.67e-07	down	-3.72474	Promoter (<=1kb)	2	8174165	8226438	52274	1	FBgn0053087	FBtr0344894	516
sr	chr3R	18121387	18121389	3	*	sr	76458	1	0	1	3.51e-08	2.28e-06	down	-3.72395	Promoter (<=1kb)	4	18122061	18133749	11689	1	FBgn0003499	FBtr0083543	-672
lncRNA:CR45347	chr2L	20562548	20562550	3	*	lncRNA:CR45347	15452	1	0	1	1.95e-09	7.57e-07	down	-3.7141	Promoter (<=1kb)	1	20562298	20562448	151	1	FBgn0263533	FBtr0309623	250
Pka-C1	chr2L	9699185	9699187	3	*	Pka-C1	7615	1	0	1	7.15e-09	1.09e-06	down	-3.71398	Promoter (<=1kb)	1	9682315	9699297	16983	2	FBgn0000273	FBtr0079851	110
asRNA:CR43872	chr3L	20302028	20302030	3	*	asRNA:CR43872	55044	1	0	1	2.52e-06	2.17e-05	down	-3.71388	Promoter (<=1kb)	3	20297129	20302141	5013	2	FBgn0052226	FBtr0074846	111
Pex23	chr3L	20302028	20302030	3	*	Pex23	55044	1	0	1	2.52e-06	2.17e-05	down	-3.71388	Promoter (<=1kb)	3	20297129	20302141	5013	2	FBgn0052226	FBtr0074846	111
lncRNA:CR43700	chr2L	19024322	19024324	3	*	lncRNA:CR43700	14404	1	0	1	5.32e-07	9.74e-06	down	-3.71241	Promoter (<=1kb)	1	19023671	19024440	770	2	FBgn0263838	FBtr0321273	116
aft	chr2R	17786162	17786164	3	*	aft	33220	1	0	1	2.7e-07	6.87e-06	down	-3.71238	Promoter (<=1kb)	2	17786135	17788556	2422	1	FBgn0026309	FBtr0089549	27
pros	chr3R	11372978	11372980	3	*	pros	71041	1	0	1	1.18e-07	4.31e-06	down	-3.70622	Promoter (<=1kb)	4	11372788	11395077	22290	1	FBgn0004595	FBtr0304606	190
Orc1	chr2R	7525537	7525682	146	*	Orc1	24813	2	0	2	8.71e-08	3.71e-06	down	-3.70525	Promoter (<=1kb)	2	7522437	7525716	3280	2	FBgn0286788	FBtr0088959	34
Vha68-1	chr2L	13004100	13004102	3	*	Vha68-1	10084	1	0	1	9.85e-08	3.93e-06	down	-3.70489	Promoter (<=1kb)	1	13000770	13004107	3338	2	FBgn0265262	FBtr0080429	5
Act5C	chrX	5902415	5902417	3	*	Act5C	92942	1	0	1	3.05e-09	7.91e-07	down	-3.70276	Promoter (<=1kb)	6	5901982	5905227	3246	1	FBgn0000042	FBtr0070823	433
lncRNA:CR30055	chr2R	12589603	12589605	3	*	lncRNA:CR30055	29116	1	0	1	9.12e-10	6.43e-07	down	-3.70124	Promoter (<=1kb)	2	12589767	12590705	939	1	FBgn0050055	FBtr0345021	-162
Sin3A	chr2R	12589603	12589605	3	*	Sin3A	29116	1	0	1	9.12e-10	6.43e-07	down	-3.70124	Promoter (<=1kb)	2	12589767	12590705	939	1	FBgn0050055	FBtr0345021	-162
su(sable)	chrX	636593	636595	3	*	su(sable)	89257	1	0	1	1.07e-09	6.43e-07	down	-3.6952	Promoter (<=1kb)	6	636442	643760	7319	1	FBgn0003575	FBtr0340082	151
SsRbeta	chr3L	16130170	16130172	3	*	SsRbeta	51827	1	0	1	1.31e-05	5.69e-05	down	-3.68538	Promoter (<=1kb)	3	16129617	16130983	1367	1	FBgn0011016	FBtr0075453	553
snRNA:U1:21D	chr2L	901624	901626	3	*	snRNA:U1:21D	764	1	0	1	2.55e-10	6.06e-07	down	-3.68017	Promoter (<=1kb)	1	901491	901654	164	2	FBgn0003916	FBtr0078028	28
snoRNA:lola-b	chr2R	10536681	10536770	90	*	snoRNA:lola-b	27466	2	0	2	4e-08	2.45e-06	down	-3.67942	Promoter (<=1kb)	2	10536495	10536660	166	2	FBgn0263466	FBtr0309765	-21
kek2	chr2L	11582017	11582019	3	*	kek2	9143	1	0	1	4.44e-07	8.85e-06	down	-3.67926	Promoter (<=1kb)	1	11581937	11626883	44947	1	FBgn0015400	FBtr0080252	80
clu	chr2R	16186723	16186725	3	*	clu	31901	1	0	1	1.67e-07	5.21e-06	down	-3.67673	Promoter (<=1kb)	2	16186584	16194277	7694	1	FBgn0034087	FBtr0087242	139
brp	chr2R	9516692	9516694	3	*	brp	26550	1	0	1	8.49e-09	1.18e-06	down	-3.66341	Promoter (<=1kb)	2	9516451	9537475	21025	1	FBgn0259246	FBtr0305059	241
Pnn	chr3R	9741084	9741201	118	*	Pnn	69776	2	0	2	1.1e-07	4.14e-06	down	-3.66211	Promoter (<=1kb)	4	9740899	9742844	1946	1	FBgn0037737	FBtr0113210	185
CG11700	chrX	6283176	6283303	128	*	CG11700	93227	2	0	2	3.71e-07	8.09e-06	down	-3.65443	Promoter (<=1kb)	6	6282037	6283575	1539	2	FBgn0029856	FBtr0333520	272
prage	chrX	1789072	1789074	3	*	prage	90160	1	0	1	2.66e-09	7.91e-07	down	-3.64919	Promoter (<=1kb)	6	1788861	1788957	97	2	FBgn0262178	FBtr0304184	-115
CRMP	chr3R	5571968	5571970	3	*	CRMP	66574	1	0	1	2.47e-08	1.91e-06	down	-3.64525	Promoter (<=1kb)	4	5571108	5579189	8082	1	FBgn0023023	FBtr0114453	860
lncRNA:CR45566	chr3R	27924968	27925093	126	*	lncRNA:CR45566	84390	2	0	2	6.55e-07	1.09e-05	down	-3.63797	Promoter (<=1kb)	4	27925191	27932973	7783	1	FBgn0027579	FBtr0085249	-98
Nmda1	chr2R	12879711	12879713	3	*	Nmda1	29358	1	0	1	2.92e-07	7.14e-06	down	-3.63753	Promoter (<=1kb)	2	12877094	12879656	2563	2	FBgn0013305	FBtr0309294	-55
CG4230	chr2L	5096840	5096842	3	*	CG4230	3964	1	0	1	2.17e-10	5.67e-07	down	-3.62641	Promoter (<=1kb)	1	5096371	5099294	2924	1	FBgn0031683	FBtr0329983	469
CG10222	chr3L	13412297	13412299	3	*	CG10222	49833	1	0	1	2.46e-09	7.9e-07	down	-3.62127	Promoter (<=1kb)	3	13411122	13412453	1332	2	FBgn0036356	FBtr0345341	154
Traf4	chr2L	4371392	4371406	15	*	Traf4	3290	2	0	2	7.5e-10	6.43e-07	down	-3.61482	Promoter (<=1kb)	1	4361689	4371303	9615	2	FBgn0266903	FBtr0445833	-89
slpr	chrX	8177050	8177122	73	*	slpr	94495	2	0	2	2.11e-06	1.97e-05	down	-3.61325	Promoter (<=1kb)	6	8170229	8177185	6957	2	FBgn0030018	FBtr0303843	63
CG43736	chrX	6868490	6868492	3	*	CG43736	93603	1	0	1	4.65e-10	6.43e-07	down	-3.61277	Promoter (<=1kb)	6	6868508	6874916	6409	1	FBgn0263993	FBtr0330262	-16
Dop2R	chrX	20062682	20062864	183	*	Dop2R	102710	2	0	2	1.59e-09	7.3e-07	down	-3.60817	Promoter (<=1kb)	6	20004680	20062706	58027	2	FBgn0053517	FBtr0343167	0
Calr	chr3R	9630532	9630534	3	*	Calr	69668	1	0	1	1.52e-10	5.67e-07	down	-3.60381	Promoter (<=1kb)	4	9630255	9630440	186	2	FBgn0286035	FBtr0473384	-92
CG4078	chrX	5747884	5747955	72	*	CG4078	92824	2	0	2	5.91e-07	1.03e-05	down	-3.60137	Promoter (<=1kb)	6	5747747	5752077	4331	1	FBgn0029798	FBtr0332398	137
lncRNA:CR45013	chr2L	11835759	11835761	3	*	lncRNA:CR45013	9298	1	0	1	2.92e-08	2.07e-06	down	-3.59917	Promoter (<=1kb)	1	11835320	11835903	584	1	FBgn0266365	FBtr0344126	439
Pde1c	chr2L	11835759	11835761	3	*	Pde1c	9298	1	0	1	2.92e-08	2.07e-06	down	-3.59917	Promoter (<=1kb)	1	11835320	11835903	584	1	FBgn0266365	FBtr0344126	439
Mat89Ba	chr3R	16272180	16272282	103	*	Mat89Ba	75018	2	0	2	1.84e-07	5.53e-06	down	-3.59862	Promoter (<=1kb)	4	16268329	16272415	4087	2	FBgn0261286	FBtr0083275	133
mir-13a	chr3R	15417381	15417634	254	*	mir-13a	74191	3	0	3	1.48e-08	1.45e-06	down	-3.59834	Promoter (<=1kb)	4	15417408	15417475	68	2	FBgn0262367	FBtr0304169	0
mir-13b-1	chr3R	15417381	15417634	254	*	mir-13b-1	74191	3	0	3	1.48e-08	1.45e-06	down	-3.59834	Promoter (<=1kb)	4	15417408	15417475	68	2	FBgn0262367	FBtr0304169	0
Mmp2	chr2R	9657839	9657841	3	*	Mmp2	26687	1	0	1	1.29e-09	6.69e-07	down	-3.59634	Promoter (<=1kb)	2	9611139	9658230	47092	2	FBgn0033438	FBtr0334807	389
asRNA:CR44431	chrX	21043735	21043830	96	*	asRNA:CR44431	103263	2	0	2	1.79e-06	1.82e-05	down	-3.58635	Promoter (<=1kb)	6	21043550	21044024	475	2	FBgn0265613	FBtr0340439	194
dock	chr2L	826462	826464	3	*	dock	703	1	0	1	1.88e-08	1.65e-06	down	-3.58381	Promoter (<=1kb)	1	825969	833241	7273	1	FBgn0010583	FBtr0078015	493
Sxl	chrX	7097949	7097951	3	*	Sxl	93724	1	0	1	6.58e-08	3.16e-06	down	-3.58294	Promoter (<=1kb)	6	7075665	7098053	22389	2	FBgn0264270	FBtr0331251	102
Hsp27	chr3L	9384570	9384722	153	*	Hsp27	46727	2	0	2	6.08e-08	3.03e-06	down	-3.58279	Promoter (<=1kb)	3	9384063	9385694	1632	1	FBgn0001226	FBtr0346541	507
eIF3g1	chrX	2609317	2609319	3	*	eIF3g1	90902	1	0	1	4.12e-06	2.85e-05	down	-3.57521	Promoter (<=1kb)	6	2606680	2608876	2197	2	FBgn0011566	FBtr0070447	-441
CG9650	chrX	7194951	7195036	86	*	CG9650	93792	2	0	2	2.9e-08	2.06e-06	down	-3.57021	Promoter (<=1kb)	6	7196029	7241932	45904	1	FBgn0029939	FBtr0309030	-993
lncRNA:CR44357	chrX	7194951	7195036	86	*	lncRNA:CR44357	93792	2	0	2	2.9e-08	2.06e-06	down	-3.57021	Promoter (<=1kb)	6	7196029	7241932	45904	1	FBgn0029939	FBtr0309030	-993
lncRNA:CR45624	chrX	10824288	10824290	3	*	lncRNA:CR45624	96174	1	0	1	1.07e-09	6.43e-07	down	-3.56786	Promoter (<=1kb)	6	10795997	10824277	28281	2	FBgn0285926	FBtr0346315	-11
Pgi	chr2R	8913722	8913724	3	*	Pgi	26040	1	0	1	4.63e-10	6.43e-07	down	-3.56546	Promoter (<=1kb)	2	8910900	8913886	2987	2	FBgn0003074	FBtr0088681	162
EMC3	chr2L	10732204	10732347	144	*	EMC3	8434	4	0	4	7.95e-08	3.52e-06	down	-3.56018	Promoter (<=1kb)	1	10731400	10732423	1024	2	FBgn0032292	FBtr0080122	76
pk	chr2R	7172207	7172209	3	*	pk	24498	1	0	1	2.77e-06	2.28e-05	down	-3.55879	Promoter (<=1kb)	2	7172173	7223378	51206	1	FBgn0003090	FBtr0089043	34
5-HT7	chr3R	31016695	31016697	3	*	5-HT7	86808	1	0	1	2.8e-09	7.91e-07	down	-3.55337	Promoter (<=1kb)	4	30968236	31016875	48640	2	FBgn0004573	FBtr0334508	178
zfh2	chr4	501897	501899	3	*	zfh2	88096	1	0	1	7.1e-09	1.09e-06	down	-3.5457	Promoter (<=1kb)	5	501810	540874	39065	1	FBgn0004607	FBtr0307167	87
cav	chr3R	24221877	24221879	3	*	cav	81584	1	0	1	1.64e-08	1.53e-06	down	-3.54536	Promoter (<=1kb)	4	24197591	24221965	24375	2	FBgn0011725	FBtr0084566	86
twin	chr3R	24221877	24221879	3	*	twin	81584	1	0	1	1.64e-08	1.53e-06	down	-3.54536	Promoter (<=1kb)	4	24197591	24221965	24375	2	FBgn0011725	FBtr0084566	86
Gclm	chr3R	22686184	22686186	3	*	Gclm	80236	1	0	1	3.92e-09	8.32e-07	down	-3.53295	Promoter (<=1kb)	4	22685006	22686510	1505	2	FBgn0046114	FBtr0334605	324
snRNA:U12	chr3L	16653965	16654147	183	*	snRNA:U12	52269	3	0	3	1.37e-08	1.39e-06	down	-3.53023	Promoter (<=1kb)	3	16653769	16654006	238	1	FBgn0041721	FBtr0075315	196
Myo28B1	chr2L	7674643	7674645	3	*	Myo28B1	5976	1	0	1	2.94e-08	2.08e-06	down	-3.52912	Promoter (<=1kb)	1	7642005	7675078	33074	2	FBgn0264087	FBtr0330706	433
Slob	chr2L	7674643	7674645	3	*	Slob	5976	1	0	1	2.94e-08	2.08e-06	down	-3.52912	Promoter (<=1kb)	1	7642005	7675078	33074	2	FBgn0264087	FBtr0330706	433
asRNA:CR45397	chr3L	15143875	15143997	123	*	asRNA:CR45397	51046	2	0	2	4.28e-09	8.59e-07	down	-3.52843	Promoter (<=1kb)	3	15143063	15144059	997	2	FBgn0047178	FBtr0075647	62
CG32147	chr3L	15143875	15143997	123	*	CG32147	51046	2	0	2	4.28e-09	8.59e-07	down	-3.52843	Promoter (<=1kb)	3	15143063	15144059	997	2	FBgn0047178	FBtr0075647	62
Ocrl	chrX	1923067	1923167	101	*	Ocrl	90271	2	0	2	1.29e-07	4.58e-06	down	-3.52455	Promoter (<=1kb)	6	1922981	1927524	4544	1	FBgn0023508	FBtr0332586	86
Hsc70-4	chr3R	15243403	15243405	3	*	Hsc70-4	74061	1	0	1	4.11e-11	5.53e-07	down	-3.52126	Promoter (<=1kb)	4	15243198	15246614	3417	1	FBgn0266599	FBtr0083059	205
CG13054	chr3L	16256961	16256963	3	*	CG13054	51912	1	0	1	9.12e-07	1.29e-05	down	-3.51831	Promoter (<=1kb)	3	16255852	16257191	1340	2	FBgn0036584	FBtr0075481	228
CG2993	chr3R	7809070	7809072	3	*	CG2993	68300	1	0	1	1.04e-09	6.43e-07	down	-3.51737	Promoter (<=1kb)	4	7804665	7810014	5350	2	FBgn0037521	FBtr0331691	942
CG4768	chrX	16792782	16792784	3	*	CG4768	100319	1	0	1	7.34e-08	3.36e-06	down	-3.51641	Promoter (<=1kb)	6	16792119	16797742	5624	1	FBgn0030790	FBtr0347029	663
Fibp	chr3L	19817734	19817736	3	*	Fibp	54677	1	0	1	1.71e-07	5.3e-06	down	-3.51534	Promoter (<=1kb)	3	19816085	19817790	1706	2	FBgn0036911	FBtr0332727	54
Ptp61F	chr3L	1463695	1463847	153	*	Ptp61F	40493	2	0	2	1.66e-09	7.38e-07	down	-3.51113	Promoter (<=1kb)	3	1463811	1468475	4665	1	FBgn0004635	FBtr0072694	0
rho	chr3L	1463695	1463847	153	*	rho	40493	2	0	2	1.66e-09	7.38e-07	down	-3.51113	Promoter (<=1kb)	3	1463811	1468475	4665	1	FBgn0004635	FBtr0072694	0
Mid1	chr2R	24735903	24735905	3	*	Mid1	38795	1	0	1	1.09e-08	1.27e-06	down	-3.51084	Promoter (<=1kb)	2	24695378	24736657	41280	2	FBgn0053988	FBtr0331983	752
CG4360	chr3R	20327834	20327836	3	*	CG4360	78291	1	0	1	3.58e-08	2.3e-06	down	-3.50636	Promoter (<=1kb)	4	20324274	20328003	3730	2	FBgn0038787	FBtr0083899	167
lncRNA:CR42862	chr3L	224245	224247	3	*	lncRNA:CR42862	39397	1	0	1	3.82e-09	8.29e-07	down	-3.50159	Promoter (<=1kb)	3	224106	230964	6859	1	FBgn0262109	FBtr0309037	139
tara	chr3R	16226265	16226450	186	*	tara	74978	2	0	2	1.73e-07	5.33e-06	down	-3.49458	Promoter (<=1kb)	4	16225651	16260329	34679	1	FBgn0040071	FBtr0083257	614
Taldo	chr2R	23940440	23940442	3	*	Taldo	38105	1	0	1	2.17e-10	5.67e-07	down	-3.49408	Promoter (<=1kb)	2	23940410	23942114	1705	1	FBgn0023477	FBtr0072141	30
osa	chr3R	17702959	17703419	461	*	osa	76149	5	0	5	5.89e-08	2.99e-06	down	-3.49287	Promoter (<=1kb)	4	17703695	17705581	1887	1	FBgn0267702	FBtr0347244	-276
FASN2	chr2L	3046995	3047098	104	*	FASN2	2276	2	0	2	1.53e-06	1.68e-05	down	-3.48803	Promoter (<=1kb)	1	3046765	3046880	116	1	FBgn0263847	FBtr0452214	230
eEF1alpha1	chr2R	11893611	11894261	651	*	eEF1alpha1	28443	7	0	7	1.32e-06	1.55e-05	down	-3.48694	Promoter (<=1kb)	2	11893542	11895520	1979	1	FBgn0284245	FBtr0345022	69
jim	chr3L	22835040	22835042	3	*	jim	57126	1	0	1	1.31e-09	6.69e-07	down	-3.48363	Promoter (<=1kb)	3	22789233	22835194	45962	2	FBgn0027339	FBtr0078582	152
Hsc70-3	chrX	11806452	11806454	3	*	Hsc70-3	96873	1	0	1	2.03e-08	1.69e-06	down	-3.4824	Promoter (<=1kb)	6	11801696	11806353	4658	2	FBgn0001218	FBtr0073610	-99
CG12054	chr3R	31221381	31221584	204	*	CG12054	86970	3	0	3	3.81e-07	8.21e-06	down	-3.48078	Promoter (<=1kb)	4	31220702	31231259	10558	1	FBgn0039831	FBtr0335408	679
ps	chr3R	9419393	9419395	3	*	ps	69496	1	0	1	1.18e-09	6.69e-07	down	-3.47725	Promoter (<=1kb)	4	9419521	9448649	29129	1	FBgn0261552	FBtr0111029	-126
E(spl)m8-HLH	chr3R	26040348	26040503	156	*	E(spl)m8-HLH	83071	2	0	2	1.4e-08	1.4e-06	down	-3.47493	Promoter (<=1kb)	4	26040240	26041008	769	1	FBgn0000591	FBtr0084961	108
eIF2gamma	chr3R	15263325	15263327	3	*	eIF2gamma	74083	1	0	1	1.69e-06	1.77e-05	down	-3.47323	Promoter (<=1kb)	4	15257844	15263458	5615	2	FBgn0263740	FBtr0337054	131
Su(var)3-9	chr3R	15263325	15263327	3	*	Su(var)3-9	74083	1	0	1	1.69e-06	1.77e-05	down	-3.47323	Promoter (<=1kb)	4	15257844	15263458	5615	2	FBgn0263740	FBtr0337054	131
lncRNA:CR42651	chr3R	6811004	6811006	3	*	lncRNA:CR42651	67556	1	0	1	8.59e-09	1.18e-06	down	-3.46771	Promoter (<=1kb)	4	6810819	6811246	428	1	FBgn0267575	FBtr0346989	185
lncRNA:CR45915	chr3R	6811004	6811006	3	*	lncRNA:CR45915	67556	1	0	1	8.59e-09	1.18e-06	down	-3.46771	Promoter (<=1kb)	4	6810819	6811246	428	1	FBgn0267575	FBtr0346989	185
Myb	chrX	15857730	15857732	3	*	Myb	99577	1	0	1	8.95e-07	1.28e-05	down	-3.46547	Promoter (<=1kb)	6	15854832	15857823	2992	2	FBgn0002914	FBtr0074171	91
gish	chr3R	16272646	16272648	3	*	gish	75019	1	0	1	1e-08	1.22e-06	down	-3.46457	Promoter (<=1kb)	4	16272452	16302372	29921	1	FBgn0250823	FBtr0330041	194
CG10863	chr3L	3942337	3942339	3	*	CG10863	42432	1	0	1	8.22e-09	1.16e-06	down	-3.46412	Promoter (<=1kb)	3	3941008	3942465	1458	2	FBgn0027552	FBtr0073171	126
CG13995	chr2L	6054671	6054673	3	*	CG13995	4713	1	0	1	1.1e-08	1.27e-06	down	-3.46295	Promoter (<=1kb)	1	6054302	6060169	5868	1	FBgn0031770	FBtr0079187	369
Rdl	chr3L	9177112	9177114	3	*	Rdl	46568	1	0	1	7.93e-10	6.43e-07	down	-3.4569	Promoter (<=1kb)	3	9149398	9177542	28145	2	FBgn0004244	FBtr0076534	428
CG8066	chr3R	14568215	14568217	3	*	CG8066	73561	1	0	1	2.05e-05	7.53e-05	down	-3.45523	Promoter (<=1kb)	4	14567611	14568847	1237	2	FBgn0038243	FBtr0082981	630
AMPdeam	chrX	13845276	13845278	3	*	AMPdeam	98208	1	0	1	1.28e-08	1.35e-06	down	-3.45269	Promoter (<=1kb)	6	13830741	13845866	15126	2	FBgn0052626	FBtr0309245	588
lncRNA:CR46003	chr3L	10306925	10306927	3	*	lncRNA:CR46003	47360	1	0	1	2.65e-09	7.91e-07	down	-3.45268	Promoter (<=1kb)	3	10306884	10320600	13717	1	FBgn0267666	FBtr0347129	41
lncRNA:CR46004	chr3L	10306925	10306927	3	*	lncRNA:CR46004	47360	1	0	1	2.65e-09	7.91e-07	down	-3.45268	Promoter (<=1kb)	3	10306884	10320600	13717	1	FBgn0267666	FBtr0347129	41
drosha	chr2R	7932433	7932726	294	*	drosha	25147	3	0	3	2.43e-06	2.13e-05	down	-3.45149	Promoter (<=1kb)	2	7932429	7936840	4412	1	FBgn0026722	FBtr0088850	4
Tctp	chr3R	11210197	11210485	289	*	Tctp	70915	4	0	4	1.02e-07	3.99e-06	down	-3.45136	Promoter (<=1kb)	4	11210247	11211282	1036	1	FBgn0037874	FBtr0082344	0
Usp30	chrX	5879364	5879497	134	*	Usp30	92923	2	0	2	2.57e-06	2.19e-05	down	-3.45007	Promoter (<=1kb)	6	5877000	5879618	2619	2	FBgn0029819	FBtr0343537	121
snRNA:U2:38ABa	chr2L	19815779	19815781	3	*	snRNA:U2:38ABa	14989	1	0	1	4.48e-08	2.6e-06	down	-3.44859	Promoter (<=1kb)	1	19815614	19815805	192	2	FBgn0003922	FBtr0081313	24
CG42846	chr3L	230545	231251	707	*	CG42846	39408	7	0	7	1.6e-07	5.11e-06	down	-3.44596	Promoter (<=1kb)	3	230971	231604	634	2	FBgn0262035	FBtr0303931	353
Gpo1	chr2R	15861904	15861906	3	*	Gpo1	31595	1	0	1	4.6e-09	8.9e-07	down	-3.4438	Promoter (<=1kb)	2	15857752	15862020	4269	2	FBgn0022160	FBtr0087308	114
lncRNA:CR45570	chr3R	30404764	30404774	11	*	lncRNA:CR45570	86282	2	0	2	6.52e-07	1.09e-05	down	-3.44096	Promoter (<=1kb)	4	30404429	30404989	561	1	FBgn0267130	FBtr0346226	335
CG46385	chr2R	7759582	7759584	3	*	CG46385	25014	1	0	1	2.79e-09	7.91e-07	down	-3.4382	Promoter (<=1kb)	2	7737768	7758877	21110	2	FBgn0286778	FBtr0474229	-705
CG15803	chr3R	18359914	18359916	3	*	CG15803	76661	1	0	1	3.62e-06	2.64e-05	down	-3.43814	Promoter (<=1kb)	4	18330932	18360728	29797	2	FBgn0038606	FBtr0302308	812
mxt	chr2L	4847207	4847302	96	*	mxt	3754	2	0	2	1.74e-07	5.34e-06	down	-3.436	Promoter (<=1kb)	1	4841482	4847295	5814	2	FBgn0031637	FBtr0077410	0
CCKLR-17D1	chrX	18726092	18726301	210	*	CCKLR-17D1	101777	4	0	4	2.02e-06	1.93e-05	down	-3.43366	Promoter (<=1kb)	6	18707494	18726572	19079	2	FBgn0259231	FBtr0299681	271
CG13928	chr3L	1627324	1627434	111	*	CG13928	40631	4	0	4	4.44e-07	8.85e-06	down	-3.42837	Promoter (<=1kb)	3	1625791	1628377	2587	2	FBgn0035246	FBtr0072822	943
GC	chr3L	1627324	1627434	111	*	GC	40631	4	0	4	4.44e-07	8.85e-06	down	-3.42837	Promoter (<=1kb)	3	1625791	1628377	2587	2	FBgn0035246	FBtr0072822	943
hop	chrX	11367844	11367991	148	*	hop	96585	2	0	2	2.25e-07	6.16e-06	down	-3.42782	Promoter (<=1kb)	6	11360930	11368098	7169	2	FBgn0004864	FBtr0073457	107
Pits	chrX	12583125	12583127	3	*	Pits	97356	1	0	1	2.17e-10	5.67e-07	down	-3.42507	Promoter (<=1kb)	6	12569169	12583193	14025	2	FBgn0030400	FBtr0331718	66
Cyp1	chrX	16319472	16319474	3	*	Cyp1	99925	1	0	1	9.95e-09	1.22e-06	down	-3.42462	Promoter (<=1kb)	6	16317673	16320370	2698	2	FBgn0004432	FBtr0074238	896
RhoGAP100F	chr3R	31813182	31813184	3	*	RhoGAP100F	87552	1	0	1	1.03e-09	6.43e-07	down	-3.41239	Promoter (<=1kb)	4	31813075	31837604	24530	1	FBgn0039883	FBtr0302179	107
Rcd-1	chrX	19639175	19639460	286	*	Rcd-1	102341	3	0	3	1.67e-06	1.76e-05	down	-3.41234	Promoter (<=1kb)	6	19638889	19640746	1858	1	FBgn0031047	FBtr0074744	286
eIF2Bepsilon	chrX	1922783	1922803	21	*	eIF2Bepsilon	90270	2	0	2	2e-07	5.78e-06	down	-3.41175	Promoter (<=1kb)	6	1920166	1922874	2709	2	FBgn0023512	FBtr0070351	71
CG4820	chr3R	11216670	11216672	3	*	CG4820	70922	1	0	1	1.73e-06	1.79e-05	down	-3.40949	Promoter (<=1kb)	4	11216535	11217898	1364	1	FBgn0037876	FBtr0113221	135
Imp	chrX	10822771	10822773	3	*	Imp	96172	1	0	1	2.92e-09	7.91e-07	down	-3.40892	Promoter (<=1kb)	6	10795437	10822786	27350	2	FBgn0285926	FBtr0073413	13
mino	chr3R	27925443	27925533	91	*	mino	84391	2	0	2	1.68e-06	1.76e-05	down	-3.40872	Promoter (<=1kb)	4	27924879	27925368	490	2	FBgn0267126	FBtr0346222	-75
CG44314	chr2R	12055145	12055147	3	*	CG44314	28582	1	0	1	2.97e-07	7.22e-06	down	-3.40766	Promoter (<=1kb)	2	12055089	12062866	7778	1	FBgn0028407	FBtr0087980	56
Drep3	chr2R	12055145	12055147	3	*	Drep3	28582	1	0	1	2.97e-07	7.22e-06	down	-3.40766	Promoter (<=1kb)	2	12055089	12062866	7778	1	FBgn0028407	FBtr0087980	56
CG6179	chrX	18380093	18380095	3	*	CG6179	101523	1	0	1	5.59e-06	3.41e-05	down	-3.40668	Promoter (<=1kb)	6	18380082	18381479	1398	1	FBgn0030915	FBtr0074558	11
ko	chr3L	21131158	21131160	3	*	ko	55822	1	0	1	2.98e-08	2.1e-06	down	-3.40559	Promoter (<=1kb)	3	21075581	21131159	55579	2	FBgn0020294	FBtr0078324	0
jigr1	chr3R	25637953	25637996	44	*	jigr1	82788	2	0	2	2.03e-07	5.83e-06	down	-3.4025	Promoter (<=1kb)	4	25637843	25651874	14032	1	FBgn0039350	FBtr0445401	110
CG43861	chr2L	20000254	20000256	3	*	CG43861	15094	1	0	1	8.95e-09	1.19e-06	down	-3.40075	Promoter (<=1kb)	1	20000122	20000448	327	2	FBgn0266213	FBtr0343851	192
lncRNA:CR44908	chr2L	20000254	20000256	3	*	lncRNA:CR44908	15094	1	0	1	8.95e-09	1.19e-06	down	-3.40075	Promoter (<=1kb)	1	20000122	20000448	327	2	FBgn0266213	FBtr0343851	192
CG15478	chrX	7717764	7717779	16	*	CG15478	94136	2	0	2	2.84e-08	2.03e-06	down	-3.39955	Promoter (<=1kb)	6	7712783	7717932	5150	2	FBgn0029955	FBtr0071078	153
Inos	chr2R	7458558	7458560	3	*	Inos	24740	1	0	1	1.26e-08	1.34e-06	down	-3.39655	Promoter (<=1kb)	2	7454922	7458874	3953	2	FBgn0025885	FBtr0089329	314
CG33543	chr2L	2005544	2005546	3	*	CG33543	1517	1	0	1	4.46e-08	2.59e-06	down	-3.39301	Promoter (<=1kb)	1	1997102	2006313	9212	2	FBgn0053543	FBtr0309285	767
asRNA:CR46093	chr3R	24319495	24319600	106	*	asRNA:CR46093	81691	2	0	2	3.4e-08	2.24e-06	down	-3.39107	Promoter (<=1kb)	4	24318816	24319782	967	2	FBgn0267762	FBtr0347326	182
BRWD3	chr3R	24319495	24319600	106	*	BRWD3	81691	2	0	2	3.4e-08	2.24e-06	down	-3.39107	Promoter (<=1kb)	4	24318816	24319782	967	2	FBgn0267762	FBtr0347326	182
lncRNA:CR44993	chr2L	21628542	21628544	3	*	lncRNA:CR44993	16245	1	0	1	8.66e-09	1.18e-06	down	-3.39002	Promoter (<=1kb)	1	21628462	21628976	515	1	FBgn0266328	FBtr0344059	80
CG30389	chr2R	21159721	21159723	3	*	CG30389	35783	1	0	1	3.42e-06	2.56e-05	down	-3.38955	Promoter (<=1kb)	2	21148265	21160401	12137	2	FBgn0050389	FBtr0310423	678
Asx	chr2R	14504347	14504349	3	*	Asx	30562	1	0	1	8.95e-09	1.19e-06	down	-3.38895	Promoter (<=1kb)	2	14504227	14512493	8267	1	FBgn0261823	FBtr0332929	120
sni	chrX	8243094	8243213	120	*	sni	94531	3	0	3	1.64e-07	5.18e-06	down	-3.3851	Promoter (<=1kb)	6	8241501	8243360	1860	2	FBgn0030026	FBtr0071183	147
Trxr-1	chrX	8243094	8243213	120	*	Trxr-1	94531	3	0	3	1.64e-07	5.18e-06	down	-3.3851	Promoter (<=1kb)	6	8241501	8243360	1860	2	FBgn0030026	FBtr0071183	147
Leash	chr3R	10885585	10885587	3	*	Leash	70715	1	0	1	2.79e-09	7.91e-07	down	-3.38323	Promoter (<=1kb)	4	10885540	10896418	10879	1	FBgn0037856	FBtr0082325	45
CG45088	chr2R	13592993	13592995	3	*	CG45088	29892	1	0	1	1.25e-08	1.34e-06	down	-3.38192	Promoter (<=1kb)	2	13580313	13593339	13027	2	FBgn0027581	FBtr0330617	344
CG6191	chr2R	13592993	13592995	3	*	CG6191	29892	1	0	1	1.25e-08	1.34e-06	down	-3.38192	Promoter (<=1kb)	2	13580313	13593339	13027	2	FBgn0027581	FBtr0330617	344
fs(1)h	chrX	8060816	8060818	3	*	fs(1)h	94384	1	0	1	2.64e-08	1.96e-06	down	-3.38101	Promoter (<=1kb)	6	8045436	8060974	15539	2	FBgn0004656	FBtr0071121	156
Cow	chr3R	23112597	23112599	3	*	Cow	80562	1	0	1	6.18e-09	1.01e-06	down	-3.3808	Promoter (<=1kb)	4	23070516	23112730	42215	2	FBgn0039054	FBtr0302023	131
Tpi	chr3R	30133218	30133515	298	*	Tpi	86108	4	0	4	1.4e-07	4.78e-06	down	-3.37955	Promoter (<=1kb)	4	30132981	30134309	1329	2	FBgn0086355	FBtr0085583	794
Pdxk	chr3L	9360622	9360624	3	*	Pdxk	46700	1	0	1	3.61e-08	2.31e-06	down	-3.37501	Promoter (<=1kb)	3	9360316	9362042	1727	1	FBgn0085484	FBtr0112761	306
CG8177	chr3L	9774779	9774781	3	*	CG8177	47009	1	0	1	2.63e-09	7.91e-07	down	-3.37164	Promoter (<=1kb)	3	9774270	9786466	12197	1	FBgn0036043	FBtr0076323	509
Eip63E	chr3L	3545654	3545656	3	*	Eip63E	42179	1	0	1	3.61e-09	8.16e-07	down	-3.37055	Promoter (<=1kb)	3	3545793	3610521	64729	1	FBgn0005640	FBtr0110924	-137
CG3408	chr3L	9509175	9509342	168	*	CG3408	46823	2	0	2	5e-09	9.19e-07	down	-3.37002	Promoter (<=1kb)	3	9506818	9509583	2766	2	FBgn0036008	FBtr0076426	241
CG9570	chrX	20051970	20052165	196	*	CG9570	102697	3	0	3	3.3e-08	2.2e-06	down	-3.36967	Promoter (<=1kb)	6	20051294	20052519	1226	1	FBgn0031085	FBtr0070002	676
GCS2alpha	chrX	21605097	21605107	11	*	GCS2alpha	103677	2	0	2	2.44e-07	6.46e-06	down	-3.36558	Promoter (<=1kb)	6	21600502	21605264	4763	2	FBgn0027588	FBtr0070059	157
aay	chr3L	9423736	9423738	3	*	aay	46749	1	0	1	1.03e-08	1.25e-06	down	-3.36408	Promoter (<=1kb)	3	9423253	9424781	1529	1	FBgn0023129	FBtr0076457	483
lncRNA:Hsromega	chr3R	21297360	21297362	3	*	lncRNA:Hsromega	79073	1	0	1	1.37e-07	4.72e-06	down	-3.36186	Promoter (<=1kb)	4	21296621	21317836	21216	1	FBgn0001234	FBtr0332373	739
CG14777	chrX	1467005	1467007	3	*	CG14777	89875	1	0	1	2.4e-07	6.39e-06	down	-3.36067	Promoter (<=1kb)	6	1466749	1468692	1944	1	FBgn0026872	FBtr0339577	256
mys	chrX	8061705	8061855	151	*	mys	94385	2	0	2	4.64e-09	8.93e-07	down	-3.35973	Promoter (<=1kb)	6	8061645	8070237	8593	1	FBgn0004657	FBtr0340137	60
CG14989	chr3L	4089492	4089494	3	*	CG14989	42550	1	0	1	1.74e-07	5.34e-06	down	-3.35787	Promoter (<=1kb)	3	4089131	4091302	2172	1	FBgn0035495	FBtr0345137	361
mRpL21	chr3L	19255023	19255025	3	*	mRpL21	54228	1	0	1	1.66e-06	1.76e-05	down	-3.35435	Promoter (<=1kb)	3	19253290	19255061	1772	2	FBgn0036853	FBtr0346548	36
IntS6	chrX	5746617	5746640	24	*	IntS6	92822	2	0	2	9.75e-08	3.91e-06	down	-3.35048	Promoter (<=1kb)	6	5738663	5746375	7713	2	FBgn0261383	FBtr0070842	-242
dpr7	chr4	253178	253180	3	*	dpr7	87914	1	0	1	3.95e-08	2.43e-06	down	-3.34941	Promoter (<=1kb)	5	247124	253329	6206	2	FBgn0053481	FBtr0334408	149
Idh3a	chrX	19521284	19521452	169	*	Idh3a	102240	2	0	2	3.49e-09	8.16e-07	down	-3.34933	Promoter (<=1kb)	6	19518428	19521804	3377	2	FBgn0027291	FBtr0307904	352
CG3909	chr3R	10043302	10043487	186	*	CG3909	70005	2	0	2	5.96e-10	6.43e-07	down	-3.34886	Promoter (<=1kb)	4	10043270	10044606	1337	1	FBgn0027524	FBtr0082172	32
CG10163	chr3L	6258268	6258719	452	*	CG10163	44210	5	0	5	8.36e-07	1.24e-05	down	-3.34737	Promoter (<=1kb)	3	6257423	6258760	1338	2	FBgn0035697	FBtr0077009	41
mrt	chr3R	27279468	27279521	54	*	mrt	83970	2	0	2	7.35e-08	3.36e-06	down	-3.34532	Promoter (<=1kb)	4	27277249	27280429	3181	2	FBgn0039507	FBtr0305974	908
stai	chr2L	6110138	6110514	377	*	stai	4754	5	0	5	3.65e-06	2.66e-05	down	-3.34519	Promoter (<=1kb)	1	6109667	6124653	14987	1	FBgn0266521	FBtr0079197	471
lncRNA:alphagamma-element:CR32865	chr3R	12477376	12477378	3	*	lncRNA:alphagamma-element:CR32865	71947	1	0	1	1.51e-08	1.47e-06	down	-3.34482	Promoter (<=1kb)	4	12475336	12478267	2932	2	FBgn0052865	FBtr0082678	889
TRAM	chrX	935581	935583	3	*	TRAM	89483	1	0	1	4.78e-06	3.11e-05	down	-3.34329	Promoter (<=1kb)	6	935580	937822	2243	1	FBgn0040340	FBtr0307182	1
lic	chrX	13091189	13091271	83	*	lic	97714	2	0	2	8.95e-10	6.43e-07	down	-3.34155	Promoter (<=1kb)	6	13091145	13093986	2842	1	FBgn0261524	FBtr0073720	44
sta	chrX	1482082	1482102	21	*	sta	89894	2	0	2	3.02e-06	2.39e-05	down	-3.34117	Promoter (<=1kb)	6	1482492	1482590	99	2	FBgn0044508	FBtr0070292	488
CG6583	chr2L	12172259	12172261	3	*	CG6583	9580	1	0	1	1.2e-07	4.36e-06	down	-3.33981	Promoter (<=1kb)	1	12171204	12172586	1383	2	FBgn0032420	FBtr0080358	325
cac	chrX	11981940	11981942	3	*	cac	97002	1	0	1	5.18e-09	9.44e-07	down	-3.33978	Promoter (<=1kb)	6	11933705	11981176	47472	2	FBgn0263111	FBtr0332391	-764
lncRNA:CR31451	chr3R	23983895	23984051	157	*	lncRNA:CR31451	81386	2	0	2	1.05e-08	1.25e-06	down	-3.33841	Promoter (<=1kb)	4	23983503	23985065	1563	1	FBgn0051451	FBtr0308923	392
luna	chr2R	11085144	11085146	3	*	luna	27777	1	0	1	1.17e-06	1.47e-05	down	-3.33687	Promoter (<=1kb)	2	11085586	11088300	2715	1	FBgn0262817	FBtr0306049	-440
CG5522	chr2R	16784004	16784006	3	*	CG5522	32391	1	0	1	6.26e-08	3.07e-06	down	-3.33379	Promoter (<=1kb)	2	16783671	16792472	8802	1	FBgn0034158	FBtr0087029	333
nAChRalpha7	chrX	19347982	19347984	3	*	nAChRalpha7	102154	1	0	1	2.65e-07	6.81e-06	down	-3.33369	Promoter (<=1kb)	6	19327075	19348447	21373	2	FBgn0086778	FBtr0301834	463
eIF4EHP	chr3R	24106810	24106812	3	*	eIF4EHP	81474	1	0	1	5.32e-07	9.74e-06	down	-3.33292	Promoter (<=1kb)	4	24107391	24108358	968	1	FBgn0039147	FBtr0084542	-579
RpL10Ab	chr3L	11822971	11822981	11	*	RpL10Ab	48514	2	0	2	3.9e-07	8.3e-06	down	-3.33086	Promoter (<=1kb)	3	11822984	11823124	141	1	FBgn0083015	FBtr0113610	-3
Tob	chrX	16086813	16086839	27	*	Tob	99746	2	0	2	2.53e-07	6.61e-06	down	-3.32754	Promoter (<=1kb)	6	16077887	16087389	9503	2	FBgn0028397	FBtr0310446	550
CG17364	chr3L	13992845	13992847	3	*	CG17364	50188	1	0	1	6.68e-08	3.19e-06	down	-3.3259	Promoter (<=1kb)	3	13977905	13993400	15496	2	FBgn0036391	FBtr0333027	553
Gyc32E	chr2L	11148689	11148691	3	*	Gyc32E	8774	1	0	1	9.3e-09	1.22e-06	down	-3.32587	Promoter (<=1kb)	1	11138759	11149101	10343	2	FBgn0010197	FBtr0112856	410
CG32815	chrX	935145	935147	3	*	CG32815	89482	1	0	1	5.06e-07	9.52e-06	down	-3.32571	Promoter (<=1kb)	6	935232	937822	2591	1	FBgn0040340	FBtr0070167	-85
Gycbeta100B	chr3R	31167625	31167627	3	*	Gycbeta100B	86912	1	0	1	1.81e-06	1.83e-05	down	-3.32477	Promoter (<=1kb)	4	31158156	31168604	10449	2	FBgn0086704	FBtr0085782	977
stops	chr3R	31167625	31167627	3	*	stops	86912	1	0	1	1.81e-06	1.83e-05	down	-3.32477	Promoter (<=1kb)	4	31158156	31168604	10449	2	FBgn0086704	FBtr0085782	977
Aps	chr3L	10898214	10898216	3	*	Aps	47761	1	0	1	1.01e-09	6.43e-07	down	-3.32267	Promoter (<=1kb)	3	10894776	10898573	3798	2	FBgn0036111	FBtr0076250	357
CG15601	chrX	15710681	15710683	3	*	CG15601	99443	1	0	1	5.64e-09	9.79e-07	down	-3.31841	Promoter (<=1kb)	6	15710647	15712186	1540	1	FBgn0030673	FBtr0339683	34
CG8038	chr3L	7978490	7978639	150	*	CG8038	45448	3	0	3	7.56e-10	6.43e-07	down	-3.31733	Promoter (<=1kb)	3	7977805	7978650	846	2	FBgn0035831	FBtr0076763	11
fax	chr3L	16411467	16411469	3	*	fax	52080	1	0	1	4.04e-09	8.41e-07	down	-3.31661	Promoter (<=1kb)	3	16403578	16411784	8207	2	FBgn0014163	FBtr0100477	315
fabp	chr3R	11562383	11562385	3	*	fabp	71187	1	0	1	7.51e-07	1.17e-05	down	-3.31583	Promoter (<=1kb)	4	11559896	11562296	2401	2	FBgn0037912	FBtr0100462	-87
sea	chr3R	11562383	11562385	3	*	sea	71187	1	0	1	7.51e-07	1.17e-05	down	-3.31583	Promoter (<=1kb)	4	11559896	11562296	2401	2	FBgn0037912	FBtr0100462	-87
Stt3A	chrX	21053168	21053170	3	*	Stt3A	103273	1	0	1	1.09e-09	6.43e-07	down	-3.31527	Promoter (<=1kb)	6	21049885	21053937	4053	2	FBgn0031149	FBtr0345923	767
Tsp42Ek	chr2R	7043372	7043374	3	*	Tsp42Ek	24390	1	0	1	2.76e-06	2.28e-05	down	-3.31526	Promoter (<=1kb)	2	7042910	7044710	1801	1	FBgn0033133	FBtr0089031	462
Hr38	chr2L	20714484	20714486	3	*	Hr38	15578	1	0	1	2.6e-08	1.96e-06	down	-3.31472	Promoter (<=1kb)	1	20683462	20714588	31127	2	FBgn0014859	FBtr0081397	102
ctp	chrX	4702004	4702006	3	*	ctp	92216	1	0	1	4.9e-09	9.13e-07	down	-3.31457	Promoter (<=1kb)	6	4702284	4705123	2840	1	FBgn0028325	FBtr0070709	-278
HDAC1	chr3L	4626876	4626878	3	*	HDAC1	43043	1	0	1	1.71e-07	5.29e-06	down	-3.31398	Promoter (<=1kb)	3	4626602	4626903	302	2	FBgn0266987	FBtr0345903	25
lncRNA:CR45438	chr3L	4626876	4626878	3	*	lncRNA:CR45438	43043	1	0	1	1.71e-07	5.29e-06	down	-3.31398	Promoter (<=1kb)	3	4626602	4626903	302	2	FBgn0266987	FBtr0345903	25
hep	chrX	13090358	13090360	3	*	hep	97713	1	0	1	4.82e-10	6.43e-07	down	-3.31305	Promoter (<=1kb)	6	13079205	13090434	11230	2	FBgn0010303	FBtr0330396	74
Rab2	chr2R	6697115	6697117	3	*	Rab2	24128	1	0	1	4.97e-09	9.17e-07	down	-3.31197	Promoter (<=1kb)	2	6696739	6699469	2731	1	FBgn0014009	FBtr0086124	376
Argk	chr3L	9050689	9050691	3	*	Argk	46470	1	0	1	4.87e-11	5.67e-07	down	-3.3111	Promoter (<=1kb)	3	9048781	9050356	1576	2	FBgn0000116	FBtr0345030	-333
lncRNA:CR44772	chr2L	2758119	2758121	3	*	lncRNA:CR44772	2039	1	0	1	5.37e-08	2.83e-06	down	-3.30999	Promoter (<=1kb)	1	2757940	2758176	237	2	FBgn0265997	FBtr0343107	55
IA-2	chr2L	1047894	1047896	3	*	IA-2	863	1	0	1	5.46e-10	6.43e-07	down	-3.30866	Promoter (<=1kb)	1	1008378	1048053	39676	2	FBgn0031294	FBtr0301417	157
Esyt2	chr3R	24548549	24548551	3	*	Esyt2	81885	1	0	1	3.7e-07	8.08e-06	down	-3.30858	Promoter (<=1kb)	4	24549014	24556549	7536	1	FBgn0266758	FBtr0084648	-463
side-VIII	chr2R	20424352	20424354	3	*	side-VIII	35193	1	0	1	1.87e-07	5.58e-06	down	-3.30459	Promoter (<=1kb)	2	20424338	20478951	54614	1	FBgn0086604	FBtr0342690	14
CG14982	chr3L	3943119	3943121	3	*	CG14982	42433	1	0	1	1.72e-08	1.58e-06	down	-3.30413	Promoter (<=1kb)	3	3942850	3946447	3598	1	FBgn0035477	FBtr0073163	269
CG14200	chrX	19496219	19496370	152	*	CG14200	102222	2	0	2	1.01e-07	3.97e-06	down	-3.30334	Promoter (<=1kb)	6	19496675	19509350	12676	1	FBgn0027621	FBtr0074714	-305
Pfrx	chrX	19496219	19496370	152	*	Pfrx	102222	2	0	2	1.01e-07	3.97e-06	down	-3.30334	Promoter (<=1kb)	6	19496675	19509350	12676	1	FBgn0027621	FBtr0074714	-305
CR30409	chr2R	23355037	23355457	421	*	CR30409	37595	4	0	4	2.87e-06	2.32e-05	down	-3.30243	Promoter (<=1kb)	2	23355183	23356192	1010	1	FBgn0050410	FBtr0301852	0
Rpi	chr2R	23355037	23355457	421	*	Rpi	37595	4	0	4	2.87e-06	2.32e-05	down	-3.30243	Promoter (<=1kb)	2	23355183	23356192	1010	1	FBgn0050410	FBtr0301852	0
mRpS18C	chr3R	30424062	30424187	126	*	mRpS18C	86291	2	0	2	1e-05	4.81e-05	down	-3.30188	Promoter (<=1kb)	4	30423974	30424556	583	1	FBgn0039765	FBtr0085625	88
hdc	chr3R	30278231	30278233	3	*	hdc	86224	1	0	1	2.77e-08	2.01e-06	down	-3.3013	Promoter (<=1kb)	4	30277932	30372382	94451	1	FBgn0010113	FBtr0330311	299
Ankle2	chrX	17578526	17578689	164	*	Ankle2	100924	4	0	4	3.46e-08	2.26e-06	down	-3.30121	Promoter (<=1kb)	6	17578689	17579135	447	1	FBgn0264955	FBtr0335255	0
CG1927	chr3L	1969775	1969953	179	*	CG1927	40941	2	0	2	3.56e-08	2.3e-06	down	-3.29833	Promoter (<=1kb)	3	1966725	1970079	3355	2	FBgn0027547	FBtr0072853	126
Smyd3	chrX	2608749	2608906	158	*	Smyd3	90901	2	0	2	3.81e-05	0.000113785	down	-3.29373	Promoter (<=1kb)	6	2606680	2608876	2197	2	FBgn0011566	FBtr0070447	0
abd-A	chr3R	16829547	16829549	3	*	abd-A	75488	1	0	1	1.36e-07	4.7e-06	down	-3.29318	Promoter (<=1kb)	4	16807627	16829752	22126	2	FBgn0000014	FBtr0083387	203
rdgC	chr3L	20248585	20248587	3	*	rdgC	55005	1	0	1	3.81e-07	8.21e-06	down	-3.29234	Promoter (<=1kb)	3	20248628	20265554	16927	1	FBgn0265959	FBtr0342947	-41
CG17841	chrX	10368961	10368963	3	*	CG17841	95891	1	0	1	0.000187205	0.000376115	down	-3.29022	Promoter (<=1kb)	6	10368052	10384183	16132	1	FBgn0028480	FBtr0071444	909
CG42613	chr3R	18949916	18949918	3	*	CG42613	77157	1	0	1	1.95e-09	7.57e-07	down	-3.28809	Promoter (<=1kb)	4	18950196	18976557	26362	1	FBgn0261262	FBtr0304686	-278
CG46320	chr3L	5665949	5665951	3	*	CG46320	43667	1	0	1	6.98e-08	3.26e-06	down	-3.28564	Promoter (<=1kb)	3	5666849	5749599	82751	1	FBgn0085447	FBtr0112708	-898
Vha44	chr2R	16334395	16334397	3	*	Vha44	32044	1	0	1	1.93e-07	5.65e-06	down	-3.28559	Promoter (<=1kb)	2	16325913	16333982	8070	2	FBgn0262511	FBtr0087176	-413
CG18675	chr3L	4187368	4187370	3	*	CG18675	42653	1	0	1	8.98e-09	1.19e-06	down	-3.28553	Promoter (<=1kb)	3	4186018	4186865	848	2	FBgn0028664	FBtr0073256	-503
Teh2	chr3L	4187368	4187370	3	*	Teh2	42653	1	0	1	8.98e-09	1.19e-06	down	-3.28553	Promoter (<=1kb)	3	4186018	4186865	848	2	FBgn0028664	FBtr0073256	-503
Ntf-2	chrX	21035502	21035568	67	*	Ntf-2	103258	3	0	3	3.21e-06	2.47e-05	down	-3.28145	Promoter (<=1kb)	6	21035469	21041467	5999	1	FBgn0031145	FBtr0333762	33
fwe	chr3L	15816006	15816062	57	*	fwe	51570	2	0	2	4.45e-07	8.85e-06	down	-3.27902	Promoter (<=1kb)	3	15810081	15816410	6330	2	FBgn0261722	FBtr0075541	348
Ca-beta	chr2L	11202799	11202801	3	*	Ca-beta	8805	1	0	1	5.5e-09	9.68e-07	down	-3.27841	Promoter (<=1kb)	1	11157195	11203544	46350	2	FBgn0259822	FBtr0310280	743
sl	chrX	16350438	16350440	3	*	sl	99950	1	0	1	6.31e-08	3.08e-06	down	-3.27796	Promoter (<=1kb)	6	16350315	16356482	6168	1	FBgn0003416	FBtr0074230	123
Hsp23	chr3L	9382171	9382173	3	*	Hsp23	46722	1	0	1	3.27e-07	7.61e-06	down	-3.27199	Promoter (<=1kb)	3	9381882	9382765	884	1	FBgn0001224	FBtr0309504	289
ics	chr2L	13640391	13640393	3	*	ics	10515	1	0	1	3.95e-07	8.35e-06	down	-3.27176	Promoter (<=1kb)	1	13639519	13641272	1754	2	FBgn0028546	FBtr0342905	879
CG11537	chr3L	3139248	3139250	3	*	CG11537	41793	1	0	1	1.35e-09	6.79e-07	down	-3.2704	Promoter (<=1kb)	3	3128034	3139953	11920	2	FBgn0035400	FBtr0113132	703
chic	chr2L	5979123	5979125	3	*	chic	4640	1	0	1	8.98e-09	1.19e-06	down	-3.26859	Promoter (<=1kb)	1	5972900	5980101	7202	2	FBgn0000308	FBtr0079235	976
lncRNA:CR44522	chr3L	6263322	6263423	102	*	lncRNA:CR44522	44218	3	0	3	2.27e-08	1.81e-06	down	-3.26832	Promoter (<=1kb)	3	6263008	6263399	392	2	FBgn0265715	FBtr0340648	0
CG3530	chr2R	23394975	23395121	147	*	CG3530	37631	2	0	2	1.7e-09	7.39e-07	down	-3.26706	Promoter (<=1kb)	2	23389009	23395421	6413	2	FBgn0028497	FBtr0072029	300
Frq2	chrX	18186533	18186535	3	*	Frq2	101378	1	0	1	3.57e-08	2.3e-06	down	-3.26526	Promoter (<=1kb)	6	18186155	18204407	18253	1	FBgn0083228	FBtr0301628	378
CG32333	chr3L	1276166	1276168	3	*	CG32333	40313	1	0	1	6.18e-09	1.01e-06	down	-3.26342	Promoter (<=1kb)	3	1275956	1295699	19744	1	FBgn0052333	FBtr0331863	210
CG7872	chrX	15578354	15578356	3	*	CG7872	99309	1	0	1	4.27e-05	0.00012332	down	-3.26191	Promoter (<=1kb)	6	15578205	15579857	1653	1	FBgn0030658	FBtr0074046	149
danr	chr3R	25138459	25138461	3	*	danr	82418	1	0	1	6.12e-09	1.01e-06	down	-3.26014	Promoter (<=1kb)	4	25138072	25139903	1832	1	FBgn0039283	FBtr0084780	387
Rpn9	chr3R	23733012	23733014	3	*	Rpn9	81178	1	0	1	4.21e-08	2.49e-06	down	-3.25606	Promoter (<=1kb)	4	23731503	23733011	1509	2	FBgn0028691	FBtr0084470	-1
GstO2	chr3L	8523091	8523205	115	*	GstO2	45910	2	0	2	3.36e-06	2.54e-05	down	-3.25449	Promoter (<=1kb)	3	8521429	8523501	2073	2	FBgn0035906	FBtr0076654	296
D1	chr3R	9239586	9239709	124	*	D1	69364	2	0	2	1.3e-08	1.37e-06	down	-3.25443	Promoter (<=1kb)	4	9238083	9240267	2185	2	FBgn0000412	FBtr0081988	558
flfl	chr3R	13684039	13684084	46	*	flfl	72820	2	0	2	1.15e-07	4.25e-06	down	-3.25429	Promoter (<=1kb)	4	13683921	13693905	9985	1	FBgn0024555	FBtr0114604	118
omd	chr3R	13684039	13684084	46	*	omd	72820	2	0	2	1.15e-07	4.25e-06	down	-3.25429	Promoter (<=1kb)	4	13683921	13693905	9985	1	FBgn0024555	FBtr0114604	118
RpS11	chr2R	12200311	12200313	3	*	RpS11	28705	1	0	1	2.13e-08	1.74e-06	down	-3.25335	Promoter (<=1kb)	2	12199024	12200815	1792	2	FBgn0033699	FBtr0088007	502
AstA-R1	chrX	3574590	3574592	3	*	AstA-R1	91492	1	0	1	1.3e-07	4.6e-06	down	-3.25274	Promoter (<=1kb)	6	3574536	3666724	92189	1	FBgn0266429	FBtr0333798	54
His1:CG33801	chr2L	21417947	21417949	3	*	His1:CG33801	16145	1	0	1	0.000117736	0.000261717	down	-3.25218	Promoter (<=1kb)	1	21418112	21418706	595	2	FBgn0053910	FBtr0091914	757
CG42271	chrX	14233558	14233560	3	*	CG42271	98455	1	0	1	1.82e-06	1.83e-05	down	-3.25201	Promoter (<=1kb)	6	14228060	14234066	6007	2	FBgn0259166	FBtr0299615	506
zld	chrX	19782809	19782824	16	*	zld	102506	2	0	2	1.67e-07	5.22e-06	down	-3.25001	Promoter (<=1kb)	6	19775987	19783143	7157	2	FBgn0259789	FBtr0345014	319
Tat	chr3L	9423240	9423242	3	*	Tat	46748	1	0	1	3.05e-09	7.91e-07	down	-3.24899	Promoter (<=1kb)	3	9423253	9424781	1529	1	FBgn0023129	FBtr0076457	-11
kek3	chr2L	15552896	15552898	3	*	kek3	12047	1	0	1	2.02e-07	5.82e-06	down	-3.24879	Promoter (<=1kb)	1	15552723	15583978	31256	1	FBgn0028370	FBtr0300848	173
MKP-4	chrX	19623381	19623383	3	*	MKP-4	102332	1	0	1	6.43e-09	1.04e-06	down	-3.24868	Promoter (<=1kb)	6	19623127	19625199	2073	1	FBgn0031044	FBtr0332481	254
Uba1	chr2R	9693279	9693281	3	*	Uba1	26714	1	0	1	5.32e-08	2.81e-06	down	-3.24818	Promoter (<=1kb)	2	9688289	9693328	5040	2	FBgn0023143	FBtr0088499	47
alc	chr2R	9137018	9137301	284	*	alc	26270	3	0	3	8.66e-07	1.26e-05	down	-3.24647	Promoter (<=1kb)	2	9135375	9137370	1996	2	FBgn0260972	FBtr0088625	69
Msp300	chr2L	5109183	5109185	3	*	Msp300	3981	1	0	1	4.82e-08	2.66e-06	down	-3.24597	Promoter (<=1kb)	1	5108814	5158263	49450	1	FBgn0261836	FBtr0303383	369
Atet	chr2L	4334827	4334829	3	*	Atet	3251	1	0	1	1.45e-06	1.63e-05	down	-3.24576	Promoter (<=1kb)	1	4333913	4345776	11864	1	FBgn0020762	FBtr0112899	914
CG42337	chr3L	21192878	21192880	3	*	CG42337	55856	1	0	1	3.26e-08	2.2e-06	down	-3.24425	Promoter (<=1kb)	3	21183313	21193363	10051	2	FBgn0259239	FBtr0305981	483
CG7971	chr3L	1663343	1663345	3	*	CG7971	40662	1	0	1	4.77e-10	6.43e-07	down	-3.24212	Promoter (<=1kb)	3	1660599	1664241	3643	2	FBgn0035253	FBtr0072808	896
lncRNA:CR45593	chr3R	6761867	6762029	163	*	lncRNA:CR45593	67514	3	0	3	4.92e-07	9.36e-06	down	-3.24128	Promoter (<=1kb)	4	6762593	6765261	2669	1	FBgn0000071	FBtr0081618	-564
COX5B	chr2L	6557822	6557914	93	*	COX5B	5049	2	0	2	1.47e-05	6.12e-05	down	-3.23779	Promoter (<=1kb)	1	6557800	6559308	1509	1	FBgn0031830	FBtr0079288	22
rictor	chrX	19261171	19261173	3	*	rictor	102092	1	0	1	1.25e-08	1.34e-06	down	-3.23614	Promoter (<=1kb)	6	19252111	19261240	9130	2	FBgn0031006	FBtr0074689	67
CG10527	chr2R	21072509	21072511	3	*	CG10527	35722	1	0	1	5.38e-07	9.79e-06	down	-3.2346	Promoter (<=1kb)	2	21070368	21072789	2422	2	FBgn0034583	FBtr0071541	278
ocm	chr2R	24187710	24187712	3	*	ocm	38358	1	0	1	1.84e-09	7.57e-07	down	-3.23456	Promoter (<=1kb)	2	24187639	24195290	7652	1	FBgn0266083	FBtr0072260	71
CG30349	chr2R	8910377	8910694	318	*	CG30349	26036	5	0	5	1.09e-06	1.41e-05	down	-3.23077	Promoter (<=1kb)	2	8909432	8910349	918	2	FBgn0033344	FBtr0088682	-28
E2f1	chr3R	21638478	21638791	314	*	E2f1	79347	5	1	4	3.22e-07	7.56e-06	down	-3.22988	Promoter (<=1kb)	4	21620304	21638494	18191	2	FBgn0011766	FBtr0084118	0
lncRNA:CR46056	chr3R	21638478	21638791	314	*	lncRNA:CR46056	79347	5	1	4	3.22e-07	7.56e-06	down	-3.22988	Promoter (<=1kb)	4	21620304	21638494	18191	2	FBgn0011766	FBtr0084118	0
CG5934	chr3R	27273877	27273879	3	*	CG5934	83964	1	0	1	2.93e-07	7.15e-06	down	-3.22742	Promoter (<=1kb)	4	27273705	27274565	861	1	FBgn0039505	FBtr0085158	172
mib2	chr2L	19035850	19035990	141	*	mib2	14419	2	0	2	2.32e-06	2.08e-05	down	-3.22702	Promoter (<=1kb)	1	19035500	19041541	6042	1	FBgn0086442	FBtr0336841	350
CG43740	chrX	10347326	10347404	79	*	CG43740	95882	2	0	2	4.6e-08	2.62e-06	down	-3.22687	Promoter (<=1kb)	6	10348170	10348337	168	1	FBgn0065046	FBtr0091641	-766
CG14312	chr3R	18283461	18283463	3	*	CG14312	76610	1	0	1	2.62e-08	1.96e-06	down	-3.22665	Promoter (<=1kb)	4	18282978	18283528	551	2	FBgn0038596	FBtr0083599	65
CG3987	chr3R	15140777	15140805	29	*	CG3987	73976	2	0	2	1.76e-05	6.87e-05	down	-3.22465	Promoter (<=1kb)	4	15136985	15140121	3137	2	FBgn0267160	FBtr0346232	-656
mAChR-A	chr2R	24389978	24389980	3	*	mAChR-A	38504	1	0	1	2.27e-07	6.18e-06	down	-3.22387	Promoter (<=1kb)	2	24378630	24390294	11665	2	FBgn0000037	FBtr0072367	314
wake	chr3R	22640230	22640232	3	*	wake	80209	1	0	1	2.67e-07	6.84e-06	down	-3.22088	Promoter (<=1kb)	4	22639808	22682176	42369	1	FBgn0266418	FBtr0344409	422
CG43229	chrX	18138705	18138750	46	*	CG43229	101342	2	0	2	3.37e-08	2.23e-06	down	-3.21834	Promoter (<=1kb)	6	18138626	18139000	375	1	FBgn0262874	FBtr0306281	79
Ca-Ma2d	chr2L	16232336	16232338	3	*	Ca-Ma2d	12439	1	0	1	0.0023402	0.00308795	down	-3.21513	Promoter (<=1kb)	1	16231475	16241527	10053	1	FBgn0261999	FBtr0332356	861
mago	chr2R	21128832	21128903	72	*	mago	35764	2	0	2	5.52e-09	9.68e-07	down	-3.21331	Promoter (<=1kb)	2	21128577	21129737	1161	1	FBgn0002736	FBtr0071569	255
puc	chr3R	8114433	8114435	3	*	puc	68547	1	0	1	2.66e-09	7.91e-07	down	-3.21169	Promoter (<=1kb)	4	8112699	8114003	1305	2	FBgn0265419	FBtr0345278	-430
HIP-R	chrX	3790130	3790191	62	*	HIP-R	91594	2	0	2	1.53e-06	1.68e-05	down	-3.21092	Promoter (<=1kb)	6	3790042	3792477	2436	1	FBgn0029676	FBtr0333764	88
CG12016	chr3L	3319677	3319679	3	*	CG12016	41990	1	0	1	3.22e-07	7.55e-06	down	-3.20889	Promoter (<=1kb)	3	3319555	3322489	2935	1	FBgn0259933	FBtr0300240	122
CG42456	chr3L	3319677	3319679	3	*	CG42456	41990	1	0	1	3.22e-07	7.55e-06	down	-3.20889	Promoter (<=1kb)	3	3319555	3322489	2935	1	FBgn0259933	FBtr0300240	122
CG14778	chrX	1467339	1467614	276	*	CG14778	89876	3	0	3	3.17e-06	2.45e-05	down	-3.20886	Promoter (<=1kb)	6	1467493	1468692	1200	1	FBgn0026872	FBtr0300352	0
CG13784	chr2L	7219416	7219418	3	*	CG13784	5615	1	0	1	2.22e-09	7.57e-07	down	-3.20714	Promoter (<=1kb)	1	7204538	7220033	15496	2	FBgn0031897	FBtr0330197	615
lbk	chr2R	16150197	16150225	29	*	lbk	31866	2	0	2	3.18e-08	2.17e-06	down	-3.20656	Promoter (<=1kb)	2	16150123	16169519	19397	1	FBgn0034083	FBtr0302084	74
Tor	chr2L	13004487	13004595	109	*	Tor	10085	2	0	2	4.76e-07	9.17e-06	down	-3.20519	Promoter (<=1kb)	1	13004480	13013197	8718	1	FBgn0021796	FBtr0336615	7
Pcd	chr3R	29723222	29723224	3	*	Pcd	85731	1	0	1	2.26e-07	6.18e-06	down	-3.20377	Promoter (<=1kb)	4	29723163	29724226	1064	1	FBgn0024841	FBtr0085458	59
TSG101	chr3L	16842613	16842615	3	*	TSG101	52452	1	0	1	2.34e-07	6.3e-06	down	-3.20208	Promoter (<=1kb)	3	16842294	16844585	2292	1	FBgn0036666	FBtr0075329	319
CG17754	chrX	9251049	9251051	3	*	CG17754	95227	1	0	1	2.68e-07	6.85e-06	down	-3.20164	Promoter (<=1kb)	6	9250420	9255953	5534	1	FBgn0030114	FBtr0340123	629
CG33639	chrX	18225971	18225973	3	*	CG33639	101404	1	0	1	3.96e-09	8.34e-07	down	-3.20089	Promoter (<=1kb)	6	18210812	18226076	15265	2	FBgn0053639	FBtr0302909	103
Sting	chr2R	9842645	9842799	155	*	Sting	26842	2	0	2	2.07e-07	5.88e-06	down	-3.19925	Promoter (<=1kb)	2	9842686	9845512	2827	1	FBgn0033453	FBtr0345020	0
px	chr2R	22561973	22561975	3	*	px	36871	1	0	1	3.43e-09	8.16e-07	down	-3.19817	Promoter (<=1kb)	2	22494297	22562065	67769	2	FBgn0003175	FBtr0331942	90
Mkp	chr3L	184428	184430	3	*	Mkp	39359	1	0	1	2.22e-10	5.67e-07	down	-3.19776	Promoter (<=1kb)	3	182522	184424	1903	2	FBgn0083992	FBtr0344094	-4
lncRNA:CR44679	chr3L	20105537	20105539	3	*	lncRNA:CR44679	54864	1	0	1	3.82e-09	8.29e-07	down	-3.19573	Promoter (<=1kb)	3	20106094	20107557	1464	1	FBgn0036936	FBtr0074818	-555
cpb	chr2L	1705031	1705033	3	*	cpb	1319	1	0	1	6.72e-07	1.1e-05	down	-3.19471	Promoter (<=1kb)	1	1705131	1706962	1832	1	FBgn0011570	FBtr0331630	-98
mei-S332	chr2R	22122984	22122986	3	*	mei-S332	36529	1	0	1	3.82e-07	8.21e-06	down	-3.19249	Promoter (<=1kb)	2	22122912	22124566	1655	1	FBgn0002715	FBtr0342979	72
snoRNA:U3:9B	chrX	10348143	10348301	159	*	snoRNA:U3:9B	95883	2	0	2	1.47e-08	1.44e-06	down	-3.19134	Promoter (<=1kb)	6	10348170	10348337	168	1	FBgn0065046	FBtr0091641	0
His3.3B	chrX	9154416	9154509	94	*	His3.3B	95135	2	0	2	1e-08	1.23e-06	down	-3.18986	Promoter (<=1kb)	6	9153238	9155012	1775	2	FBgn0004828	FBtr0071346	503
CG11317	chr3R	31096478	31096480	3	*	CG11317	86868	1	0	1	1.23e-05	5.46e-05	down	-3.18794	Promoter (<=1kb)	4	31090712	31097321	6610	2	FBgn0039816	FBtr0085741	841
CkIalpha	chrX	12653868	12654018	151	*	CkIalpha	97414	2	0	2	1.26e-09	6.69e-07	down	-3.18602	Promoter (<=1kb)	6	12654035	12657275	3241	1	FBgn0015024	FBtr0345162	-17
CG43867	chrX	841741	841743	3	*	CG43867	89436	1	0	1	1.73e-08	1.58e-06	down	-3.18564	Promoter (<=1kb)	6	808217	840989	32773	2	FBgn0264449	FBtr0343360	-752
lncRNA:CR14310	chr3R	18373262	18373264	3	*	lncRNA:CR14310	76669	1	0	1	1.51e-06	1.67e-05	down	-3.17835	Promoter (<=1kb)	4	18372928	18373329	402	1	FBgn0040569	FBtr0445667	334
Cdk12	chr3L	21516253	21516438	186	*	Cdk12	56139	2	0	2	2.07e-06	1.96e-05	down	-3.17789	Promoter (<=1kb)	3	21516306	21522156	5851	1	FBgn0037093	FBtr0078357	0
CG10947	chr2L	20398593	20398595	3	*	CG10947	15386	1	0	1	2.02e-08	1.69e-06	down	-3.17752	Promoter (<=1kb)	1	20385293	20399396	14104	2	FBgn0032857	FBtr0081369	801
mts	chr2L	7828077	7828079	3	*	mts	6149	1	0	1	1.92e-08	1.66e-06	down	-3.17751	Promoter (<=1kb)	1	7827793	7832668	4876	1	FBgn0004177	FBtr0079525	284
rb	chrX	4540486	4540488	3	*	rb	92077	1	0	1	6.38e-06	3.69e-05	down	-3.17569	Promoter (<=1kb)	6	4535635	4540626	4992	2	FBgn0003210	FBtr0070702	138
stnA	chrX	23004099	23004101	3	*	stnA	104587	1	0	1	1.16e-07	4.28e-06	down	-3.17489	Promoter (<=1kb)	6	22980722	23004648	23927	2	FBgn0016975	FBtr0302020	547
stnB	chrX	23004099	23004101	3	*	stnB	104587	1	0	1	1.16e-07	4.28e-06	down	-3.17489	Promoter (<=1kb)	6	22980722	23004648	23927	2	FBgn0016975	FBtr0302020	547
Rack1	chr2L	7826712	7827110	399	*	Rack1	6147	6	0	6	3.45e-06	2.58e-05	down	-3.17415	Promoter (<=1kb)	1	7825347	7827246	1900	2	FBgn0020618	FBtr0331238	136
E(spl)mbeta-HLH	chr3R	26005193	26005626	434	*	E(spl)mbeta-HLH	83030	5	0	5	2.01e-05	7.45e-05	down	-3.17365	Promoter (<=1kb)	4	26005046	26006023	978	2	FBgn0002733	FBtr0084982	397
kibra	chr3R	14723985	14724166	182	*	kibra	73704	2	0	2	2.51e-06	2.17e-05	down	-3.1734	Promoter (<=1kb)	4	14697689	14724261	26573	2	FBgn0262127	FBtr0344383	95
Pif1A	chr3R	8799931	8799933	3	*	Pif1A	69084	1	0	1	2.25e-09	7.57e-07	down	-3.16754	Promoter (<=1kb)	4	8774286	8799944	25659	2	FBgn0046874	FBtr0332503	11
Pif1B	chr3R	8799931	8799933	3	*	Pif1B	69084	1	0	1	2.25e-09	7.57e-07	down	-3.16754	Promoter (<=1kb)	4	8774286	8799944	25659	2	FBgn0046874	FBtr0332503	11
CG42360	chr2R	24607803	24607896	94	*	CG42360	38693	2	0	2	4.19e-06	2.87e-05	down	-3.15993	Promoter (<=1kb)	2	24607673	24608788	1116	1	FBgn0259707	FBtr0299960	130
CG42361	chr2R	24607803	24607896	94	*	CG42361	38693	2	0	2	4.19e-06	2.87e-05	down	-3.15993	Promoter (<=1kb)	2	24607673	24608788	1116	1	FBgn0259707	FBtr0299960	130
mbl	chr2R	17307879	17307881	3	*	mbl	32775	1	0	1	3.26e-07	7.6e-06	down	-3.15788	Promoter (<=1kb)	2	17306759	17307302	544	2	FBgn0263709	FBtr0310348	-577
CG42557	chr3R	29933406	29933408	3	*	CG42557	85938	1	0	1	9.52e-07	1.32e-05	down	-3.15755	Promoter (<=1kb)	4	29933287	29934587	1301	1	FBgn0260760	FBtr0301257	119
CG42558	chr3R	29933406	29933408	3	*	CG42558	85938	1	0	1	9.52e-07	1.32e-05	down	-3.15755	Promoter (<=1kb)	4	29933287	29934587	1301	1	FBgn0260760	FBtr0301257	119
CG9380	chr2R	25227056	25227058	3	*	CG9380	39209	1	0	1	5.37e-08	2.83e-06	down	-3.15571	Promoter (<=1kb)	2	25226611	25231394	4784	1	FBgn0001325	FBtr0333162	445
Kr	chr2R	25227056	25227058	3	*	Kr	39209	1	0	1	5.37e-08	2.83e-06	down	-3.15571	Promoter (<=1kb)	2	25226611	25231394	4784	1	FBgn0001325	FBtr0333162	445
spict	chr2L	12704773	12704775	3	*	spict	9893	1	0	1	4.8e-09	9.02e-07	down	-3.15378	Promoter (<=1kb)	1	12704725	12706683	1959	1	FBgn0032451	FBtr0329924	48
Pex3	chr3L	15144462	15144510	49	*	Pex3	51047	3	0	3	8.5e-09	1.18e-06	down	-3.15214	Promoter (<=1kb)	3	15144355	15146379	2025	1	FBgn0036484	FBtr0331830	107
Dap160	chr2L	21142302	21142304	3	*	Dap160	15891	1	0	1	3.93e-08	2.43e-06	down	-3.15176	Promoter (<=1kb)	1	21134439	21142347	7909	2	FBgn0023388	FBtr0306017	43
grau	chr2R	21011787	21011789	3	*	grau	35645	1	0	1	1.45e-05	6.07e-05	down	-3.15175	Promoter (<=1kb)	2	21009764	21011921	2158	2	FBgn0001133	FBtr0071548	132
Syt1	chr2L	2797400	2797402	3	*	Syt1	2068	1	0	1	1.79e-08	1.61e-06	down	-3.15159	Promoter (<=1kb)	1	2797832	2798321	490	1	FBgn0264369	FBtr0332217	-430
lncRNA:CR45717	chr2L	1143075	1143077	3	*	lncRNA:CR45717	954	1	0	1	1.62e-08	1.53e-06	down	-3.14912	Promoter (<=1kb)	1	1143201	1147395	4195	1	FBgn0031307	FBtr0077958	-124
Nacalpha	chr2R	12760700	12760702	3	*	Nacalpha	29268	1	0	1	1.33e-07	4.65e-06	down	-3.14739	Promoter (<=1kb)	2	12759693	12760792	1100	2	FBgn0086904	FBtr0087860	90
dpr4	chr3R	11542443	11542445	3	*	dpr4	71176	1	0	1	9.3e-10	6.43e-07	down	-3.14715	Promoter (<=1kb)	4	11533483	11542949	9467	2	FBgn0053512	FBtr0300491	504
Srp72	chr3R	20588987	20588989	3	*	Srp72	78443	1	0	1	9.02e-07	1.29e-05	down	-3.14509	Promoter (<=1kb)	4	20588711	20591040	2330	1	FBgn0038810	FBtr0083911	276
Svil	chr3L	2411327	2411329	3	*	Svil	41316	1	0	1	3.55e-08	2.29e-06	down	-3.14316	Promoter (<=1kb)	3	2412088	2464849	52762	1	FBgn0266696	FBtr0345088	-759
CG2918	chrX	2271080	2271142	63	*	CG2918	90610	2	0	2	1.52e-06	1.67e-05	down	-3.13967	Promoter (<=1kb)	6	2264991	2270761	5771	2	FBgn0023528	FBtr0300793	-319
hpo	chr2R	19496414	19496588	175	*	hpo	34509	2	0	2	1.92e-07	5.64e-06	down	-3.13887	Promoter (<=1kb)	2	19493996	19496856	2861	2	FBgn0261456	FBtr0331920	268
Ace	chr3R	13259219	13259221	3	*	Ace	72505	1	0	1	1.55e-07	5.05e-06	down	-3.13379	Promoter (<=1kb)	4	13228242	13259517	31276	2	FBgn0000024	FBtr0300486	296
CG5746	chr3R	24348376	24348506	131	*	CG5746	81718	2	0	2	1.62e-08	1.53e-06	down	-3.13326	Promoter (<=1kb)	4	24343895	24348791	4897	2	FBgn0039186	FBtr0334603	285
mthl4	chr2R	17445112	17445382	271	*	mthl4	32864	4	3	1	2.78e-06	2.28e-05	down	-3.13308	Promoter (<=1kb)	2	17432173	17444938	12766	2	FBgn0027506	FBtr0340213	-174
Octbeta2R	chr3R	12595526	12595528	3	*	Octbeta2R	72015	1	0	1	6.4e-09	1.04e-06	down	-3.13279	Promoter (<=1kb)	4	12552489	12595725	43237	2	FBgn0038063	FBtr0304844	197
lncRNA:CR45916	chr3L	19562482	19563011	530	*	lncRNA:CR45916	54520	6	0	6	3.74e-06	2.7e-05	down	-3.13244	Promoter (<=1kb)	3	19562636	19566533	3898	1	FBgn0267576	FBtr0346990	0
SCCRO4	chr3L	20303282	20303284	3	*	SCCRO4	55046	1	0	1	2.99e-08	2.1e-06	down	-3.13175	Promoter (<=1kb)	3	20302431	20309511	7081	1	FBgn0036967	FBtr0074838	851
Rpb8	chr3L	21728941	21728943	3	*	Rpb8	56372	1	0	1	3.99e-06	2.8e-05	down	-3.13028	Promoter (<=1kb)	3	21728932	21729694	763	1	FBgn0037121	FBtr0078432	9
Df31	chr2L	21629763	21629765	3	*	Df31	16246	1	0	1	2.3e-09	7.57e-07	down	-3.12969	Promoter (<=1kb)	1	21626309	21629932	3624	2	FBgn0022893	FBtr0100293	167
Art3	chr3R	15229332	15229334	3	*	Art3	74040	1	0	1	1.85e-09	7.57e-07	down	-3.12829	Promoter (<=1kb)	4	15227605	15229408	1804	2	FBgn0038306	FBtr0083134	74
asRNA:CR45815	chr3L	1649406	1649493	88	*	asRNA:CR45815	40647	2	0	2	1.14e-08	1.28e-06	down	-3.12667	Promoter (<=1kb)	3	1648628	1649699	1072	2	FBgn0267465	FBtr0346838	206
CG13920	chr3L	1649406	1649493	88	*	CG13920	40647	2	0	2	1.14e-08	1.28e-06	down	-3.12667	Promoter (<=1kb)	3	1648628	1649699	1072	2	FBgn0267465	FBtr0346838	206
Dpit47	chr2R	6662099	6662101	3	*	Dpit47	24089	1	0	1	3.65e-07	8.05e-06	down	-3.12434	Promoter (<=1kb)	2	6660645	6662118	1474	2	FBgn0266518	FBtr0086146	17
Nos	chr2L	10837096	10837115	20	*	Nos	8495	2	0	2	0.000201148	0.000397896	down	-3.12339	Promoter (<=1kb)	1	10804274	10837511	33238	2	FBgn0011676	FBtr0080188	396
CG32708	chrX	9086844	9086846	3	*	CG32708	95072	1	0	1	5.13e-07	9.59e-06	down	-3.12184	Promoter (<=1kb)	6	9087129	9088073	945	1	FBgn0052706	FBtr0071287	-283
Eip75B	chr3L	18064588	18064590	3	*	Eip75B	53397	1	0	1	9.86e-09	1.22e-06	down	-3.12157	Promoter (<=1kb)	3	17950953	18064696	113744	2	FBgn0000568	FBtr0306814	106
Son	chr3R	9578116	9578118	3	*	Son	69624	1	0	1	7.31e-07	1.15e-05	down	-3.12099	Promoter (<=1kb)	4	9578042	9581225	3184	1	FBgn0037716	FBtr0082072	74
rhea	chr3L	8571948	8572056	109	*	rhea	45962	2	0	2	5.88e-07	1.03e-05	down	-3.11771	Promoter (<=1kb)	3	8571799	8571898	100	1	FBgn0262387	FBtr0304250	149
kdn	chrX	6352559	6352672	114	*	kdn	93272	2	0	2	3.83e-07	8.22e-06	down	-3.11757	Promoter (<=1kb)	6	6352282	6361323	9042	1	FBgn0261955	FBtr0070907	277
kz	chrX	2241752	2241754	3	*	kz	90586	1	0	1	2.66e-09	7.91e-07	down	-3.11655	Promoter (<=1kb)	6	2237858	2242035	4178	2	FBgn0001330	FBtr0070419	281
Baldspot	chr3L	16661210	16661212	3	*	Baldspot	52279	1	0	1	2.69e-09	7.91e-07	down	-3.11541	Promoter (<=1kb)	3	16648442	16661615	13174	2	FBgn0260960	FBtr0075355	403
fzr	chrX	4678365	4678420	56	*	fzr	92200	2	0	2	4.96e-08	2.7e-06	down	-3.11267	Promoter (<=1kb)	6	4667290	4677533	10244	2	FBgn0262699	FBtr0070687	-832
CG14234	chrX	19735942	19735944	3	*	CG14234	102453	1	0	1	8.39e-08	3.62e-06	down	-3.11214	Promoter (<=1kb)	6	19735570	19740456	4887	1	FBgn0031065	FBtr0474237	372
CG1632	chrX	8271305	8271394	90	*	CG1632	94560	2	0	2	2.39e-06	2.11e-05	down	-3.10928	Promoter (<=1kb)	6	8269898	8271409	1512	2	FBgn0030028	FBtr0307283	15
Corp	chrX	8271305	8271394	90	*	Corp	94560	2	0	2	2.39e-06	2.11e-05	down	-3.10928	Promoter (<=1kb)	6	8269898	8271409	1512	2	FBgn0030028	FBtr0307283	15
Sik2	chrX	2061774	2061776	3	*	Sik2	90380	1	0	1	8.07e-09	1.15e-06	down	-3.10513	Promoter (<=1kb)	6	2055310	2061915	6606	2	FBgn0025625	FBtr0070340	139
Gad1	chr3L	4085825	4085827	3	*	Gad1	42546	1	0	1	5.67e-08	2.92e-06	down	-3.10169	Promoter (<=1kb)	3	4074077	4085843	11767	2	FBgn0004516	FBtr0073276	16
lncRNA:CR44851	chr2L	14356368	14356370	3	*	lncRNA:CR44851	11079	1	0	1	2.44e-08	1.89e-06	down	-3.10158	Promoter (<=1kb)	1	14355468	14356878	1411	2	FBgn0266145	FBtr0343679	508
Tom7	chr2R	8951818	8951820	3	*	Tom7	26084	1	0	1	1.3e-05	5.65e-05	down	-3.10069	Promoter (<=1kb)	2	8951717	8952180	464	1	FBgn0033357	FBtr0088657	101
CG5191	chr3R	20560986	20560988	3	*	CG5191	78409	1	0	1	1.67e-06	1.76e-05	down	-3.10056	Promoter (<=1kb)	4	20560865	20573000	12136	1	FBgn0038803	FBtr0083907	121
kuz	chr2L	13633660	13633662	3	*	kuz	10509	1	0	1	1.82e-06	1.83e-05	down	-3.09893	Promoter (<=1kb)	1	13632676	13633166	491	2	FBgn0263329	FBtr0308752	-494
ATP6AP2	chr3R	9260776	9260778	3	*	ATP6AP2	69388	1	0	1	2e-05	7.42e-05	down	-3.0968	Promoter (<=1kb)	4	9260638	9262590	1953	1	FBgn0037671	FBtr0081978	138
lncRNA:CR46106	chr3R	28427745	28427853	109	*	lncRNA:CR46106	84658	2	0	2	7.07e-08	3.28e-06	down	-3.09555	Promoter (<=1kb)	4	28427094	28427990	897	2	FBgn0267775	FBtr0347339	137
CG4887	chr2L	1173127	1173277	151	*	CG4887	985	2	0	2	2.03e-07	5.83e-06	down	-3.09486	Promoter (<=1kb)	1	1173009	1177589	4581	1	FBgn0031318	FBtr0331288	118
Taf8	chrX	18102097	18102099	3	*	Taf8	101304	1	0	1	2.3e-07	6.22e-06	down	-3.08832	Promoter (<=1kb)	6	18101970	18103482	1513	1	FBgn0022724	FBtr0074514	127
ND-B14.5B	chr2L	3145194	3145392	199	*	ND-B14.5B	2351	2	0	2	7.11e-08	3.3e-06	down	-3.08825	Promoter (<=1kb)	1	3145130	3145721	592	2	FBgn0031505	FBtr0077617	329
opm	chrX	15066298	15066300	3	*	opm	98948	1	0	1	5.57e-06	3.4e-05	down	-3.08598	Promoter (<=1kb)	6	15064836	15066432	1597	2	FBgn0264389	FBtr0340429	132
fand	chr2R	13593658	13593907	250	*	fand	29894	3	0	3	6.15e-06	3.61e-05	down	-3.08476	Promoter (<=1kb)	2	13593644	13596557	2914	1	FBgn0033859	FBtr0087623	14
wdn	chr3R	28810946	28810948	3	*	wdn	84943	1	0	1	2.41e-06	2.12e-05	down	-3.08312	Promoter (<=1kb)	4	28807983	28811337	3355	2	FBgn0005642	FBtr0085356	389
RpL17	chrX	6742275	6742444	170	*	RpL17	93512	2	0	2	6.77e-06	3.82e-05	down	-3.08174	Promoter (<=1kb)	6	6742349	6742491	143	2	FBgn0086602	FBtr0091803	47
snoRNA:Psi28S-3436b	chrX	6742275	6742444	170	*	snoRNA:Psi28S-3436b	93512	2	0	2	6.77e-06	3.82e-05	down	-3.08174	Promoter (<=1kb)	6	6742349	6742491	143	2	FBgn0086602	FBtr0091803	47
CG10731	chr2R	16149555	16149566	12	*	CG10731	31865	2	0	2	1.1e-07	4.14e-06	down	-3.06991	Promoter (<=1kb)	2	16148812	16149639	828	2	FBgn0034081	FBtr0344527	73
Alg1	chr3R	17811073	17811075	3	*	Alg1	76261	1	0	1	2.08e-09	7.57e-07	down	-3.06761	Promoter (<=1kb)	4	17809401	17811134	1734	2	FBgn0038552	FBtr0083523	59
CG8064	chr3R	18283875	18283877	3	*	CG8064	76611	1	0	1	2.64e-08	1.96e-06	down	-3.06717	Promoter (<=1kb)	4	18283660	18286624	2965	1	FBgn0038597	FBtr0083574	215
CG5004	chrX	17107949	17107951	3	*	CG5004	100543	1	0	1	2.06e-09	7.57e-07	down	-3.06619	Promoter (<=1kb)	6	17107582	17135988	28407	1	FBgn0260748	FBtr0074386	367
RhoGAPp190	chrX	17651212	17651214	3	*	RhoGAPp190	100968	1	0	1	3.8e-08	2.39e-06	down	-3.06226	Promoter (<=1kb)	6	17639147	17651310	12164	2	FBgn0026375	FBtr0333659	96
PCB	chr2R	9860332	9860334	3	*	PCB	26859	1	0	1	4.09e-08	2.46e-06	down	-3.06035	Promoter (<=1kb)	2	9850703	9860759	10057	2	FBgn0027580	FBtr0088456	425
CG3609	chr2L	2374268	2374270	3	*	CG3609	1775	1	0	1	1.21e-05	5.41e-05	down	-3.05744	Promoter (<=1kb)	1	2372455	2374061	1607	2	FBgn0031418	FBtr0331441	-207
pan	chr4	69380	69382	3	*	pan	87767	1	0	1	1.35e-06	1.57e-05	down	-3.05624	Promoter (<=1kb)	5	69326	110059	40734	1	FBgn0085432	FBtr0308615	54
Gapdh1	chr2R	7792621	7792623	3	*	Gapdh1	25042	1	0	1	4.19e-08	2.49e-06	down	-3.05588	Promoter (<=1kb)	2	7791901	7793230	1330	2	FBgn0001091	FBtr0100479	607
Naa15-16	chrX	19480486	19480637	152	*	Naa15-16	102206	3	0	3	2.98e-07	7.22e-06	down	-3.05434	Promoter (<=1kb)	6	19480259	19484643	4385	1	FBgn0031020	FBtr0074711	227
CG44245	chr2R	21202610	21202612	3	*	CG44245	35825	1	0	1	2.02e-08	1.69e-06	down	-3.05432	Promoter (<=1kb)	2	21203366	21209889	6524	1	FBgn0265191	FBtr0339093	-754
Gyg	chr2R	21202610	21202612	3	*	Gyg	35825	1	0	1	2.02e-08	1.69e-06	down	-3.05432	Promoter (<=1kb)	2	21203366	21209889	6524	1	FBgn0265191	FBtr0339093	-754
Wdr62	chr2L	1885490	1885492	3	*	Wdr62	1434	1	0	1	2.38e-06	2.11e-05	down	-3.05374	Promoter (<=1kb)	1	1884622	1943818	59197	1	FBgn0031374	FBtr0077811	868
lncRNA:CR44306	chr2R	12015890	12015892	3	*	lncRNA:CR44306	28553	1	0	1	5.97e-08	3e-06	down	-3.05202	Promoter (<=1kb)	2	12015095	12015895	801	1	FBgn0265365	FBtr0339556	795
bi	chrX	4412898	4412900	3	*	bi	91987	1	0	1	2.87e-07	7.1e-06	down	-3.05089	Promoter (<=1kb)	6	4412856	4484452	71597	1	FBgn0000179	FBtr0070672	42
lncRNA:CR32773	chrX	4412898	4412900	3	*	lncRNA:CR32773	91987	1	0	1	2.87e-07	7.1e-06	down	-3.05089	Promoter (<=1kb)	6	4412856	4484452	71597	1	FBgn0000179	FBtr0070672	42
Octalpha2R	chr3R	18848822	18849055	234	*	Octalpha2R	77092	3	0	3	3.45e-08	2.26e-06	down	-3.05067	Promoter (<=1kb)	4	18799280	18849224	49945	2	FBgn0038653	FBtr0083677	169
Got1	chr2R	16141373	16141687	315	*	Got1	31856	5	0	5	4.82e-07	9.25e-06	down	-3.04566	Promoter (<=1kb)	2	16142202	16142935	734	1	FBgn0050094	FBtr0087233	-515
stx	chrX	10743664	10743946	283	*	stx	96123	4	0	4	1.69e-07	5.27e-06	down	-3.04374	Promoter (<=1kb)	6	10744502	10748806	4305	1	FBgn0003204	FBtr0071495	-556
Dsp1	chrX	16334372	16334374	3	*	Dsp1	99942	1	0	1	1.25e-08	1.34e-06	down	-3.04331	Promoter (<=1kb)	6	16333612	16340624	7013	1	FBgn0278608	FBtr0089263	760
Pdha	chrX	4702456	4702458	3	*	Pdha	92217	1	0	1	1.39e-08	1.4e-06	down	-3.04201	Promoter (<=1kb)	6	4702325	4705265	2941	1	FBgn0028325	FBtr0070711	131
gol	chr2R	25084270	25084272	3	*	gol	39097	1	0	1	1.24e-08	1.34e-06	down	-3.03869	Promoter (<=1kb)	2	25072627	25084347	11721	2	FBgn0004919	FBtr0072459	75
CG13295	chr3L	6075045	6075221	177	*	CG13295	44003	3	0	3	1.44e-08	1.42e-06	down	-3.03869	Promoter (<=1kb)	3	6073490	6075245	1756	2	FBgn0035674	FBtr0077065	24
CG6628	chr3L	10166116	10166118	3	*	CG6628	47277	1	0	1	3.57e-09	8.16e-07	down	-3.03863	Promoter (<=1kb)	3	10165809	10167023	1215	2	FBgn0036072	FBtr0076311	905
dpr10	chr3L	10166116	10166118	3	*	dpr10	47277	1	0	1	3.57e-09	8.16e-07	down	-3.03863	Promoter (<=1kb)	3	10165809	10167023	1215	2	FBgn0036072	FBtr0076311	905
rngo	chrX	16442151	16442153	3	*	rngo	100042	1	0	1	8.01e-07	1.21e-05	down	-3.03858	Promoter (<=1kb)	6	16441553	16445367	3815	1	FBgn0030753	FBtr0343349	598
RpS28b	chrX	9554703	9554705	3	*	RpS28b	95400	1	0	1	4.08e-07	8.5e-06	down	-3.03676	Promoter (<=1kb)	6	9554623	9555661	1039	1	FBgn0030136	FBtr0343411	80
Mes2	chr3L	22945716	22945718	3	*	Mes2	57223	1	0	1	1.77e-05	6.88e-05	down	-3.03584	Promoter (<=1kb)	3	22945657	22952248	6592	1	FBgn0037207	FBtr0078561	59
Hmu	chr3R	27288904	27288962	59	*	Hmu	83977	2	0	2	4.76e-07	9.17e-06	down	-3.03487	Promoter (<=1kb)	4	27288769	27291592	2824	1	FBgn0015737	FBtr0085164	135
lncRNA:CR44331	chr3R	8113955	8113957	3	*	lncRNA:CR44331	68546	1	0	1	4.43e-09	8.83e-07	down	-3.03378	Promoter (<=1kb)	4	8112699	8114003	1305	2	FBgn0265419	FBtr0339726	46
CG11170	chr2R	22179694	22179853	160	*	CG11170	36568	2	0	2	1.57e-05	6.38e-05	down	-3.03179	Promoter (<=1kb)	2	22179695	22182642	2948	1	FBgn0034706	FBtr0071769	0
CG11275	chr2R	22179694	22179853	160	*	CG11275	36568	2	0	2	1.57e-05	6.38e-05	down	-3.03179	Promoter (<=1kb)	2	22179695	22182642	2948	1	FBgn0034706	FBtr0071769	0
beat-IIb	chr3R	17264426	17264428	3	*	beat-IIb	75882	1	0	1	2.61e-08	1.96e-06	down	-3.03087	Promoter (<=1kb)	4	17232253	17265049	32797	2	FBgn0038494	FBtr0339173	621
Arp8	chrX	17860748	17860750	3	*	Arp8	101121	1	0	1	5.51e-06	3.38e-05	down	-3.03036	Promoter (<=1kb)	6	17858379	17860800	2422	2	FBgn0030877	FBtr0074544	50
CG12717	chrX	12761038	12761040	3	*	CG12717	97486	1	0	1	6.31e-07	1.07e-05	down	-3.0292	Promoter (<=1kb)	6	12757760	12760617	2858	2	FBgn0020513	FBtr0073705	-421
CG14667	chr3R	5376033	5376035	3	*	CG14667	66383	1	0	1	6.42e-08	3.12e-06	down	-3.02724	Promoter (<=1kb)	4	5376780	5377975	1196	1	FBgn0041707	FBtr0078789	-745
mirr	chr3L	12694165	12694174	10	*	mirr	49267	2	0	2	2.32e-05	8.16e-05	down	-3.02676	Promoter (<=1kb)	3	12693639	12710249	16611	1	FBgn0014343	FBtr0330077	526
CG32816	chrX	460191	460310	120	*	CG32816	89102	2	0	2	8.78e-09	1.19e-06	down	-3.02456	Promoter (<=1kb)	6	460747	463176	2430	1	FBgn0000137	FBtr0070075	-437
MTA1-like	chr3R	5646896	5647096	201	*	MTA1-like	66648	2	0	2	4.46e-07	8.86e-06	down	-3.02401	Promoter (<=1kb)	4	5638655	5647910	9256	2	FBgn0027951	FBtr0290206	814
CG7370	chr3L	21770837	21770839	3	*	CG7370	56408	1	0	1	5.93e-08	3e-06	down	-3.02374	Promoter (<=1kb)	3	21745359	21770534	25176	2	FBgn0037130	FBtr0333893	-303
CG1265	chr3L	4254920	4254922	3	*	CG1265	42744	1	0	1	9.53e-08	3.89e-06	down	-3.02304	Promoter (<=1kb)	3	4254776	4256053	1278	1	FBgn0035517	FBtr0073228	144
CG42353	chrX	16104518	16104520	3	*	CG42353	99759	1	0	1	2.14e-09	7.57e-07	down	-3.02294	Promoter (<=1kb)	6	16093059	16104946	11888	2	FBgn0259699	FBtr0299952	426
CG42354	chrX	16104518	16104520	3	*	CG42354	99759	1	0	1	2.14e-09	7.57e-07	down	-3.02294	Promoter (<=1kb)	6	16093059	16104946	11888	2	FBgn0259699	FBtr0299952	426
lncRNA:CR44870	chr2L	16073033	16073035	3	*	lncRNA:CR44870	12356	1	0	1	0.0254401	0.026369	down	-3.02153	Promoter (<=1kb)	1	16072835	16073569	735	2	FBgn0266164	FBtr0343730	534
AP-2sigma	chr3R	21269379	21269670	292	*	AP-2sigma	79048	3	0	3	2.16e-08	1.75e-06	down	-3.0183	Promoter (<=1kb)	4	21266029	21269060	3032	2	FBgn0285937	FBtr0084104	-319
Rgk3	chr2R	21255823	21255825	3	*	Rgk3	35858	1	0	1	5.66e-08	2.92e-06	down	-3.01715	Promoter (<=1kb)	2	21255798	21280373	24576	1	FBgn0085426	FBtr0347186	25
kirre	chrX	2796038	2796296	259	*	kirre	91035	3	0	3	2.06e-06	1.95e-05	down	-3.01601	Promoter (<=1kb)	6	2790599	2796466	5868	2	FBgn0003996	FBtr0070490	170
w	chrX	2796038	2796296	259	*	w	91035	3	0	3	2.06e-06	1.95e-05	down	-3.01601	Promoter (<=1kb)	6	2790599	2796466	5868	2	FBgn0003996	FBtr0070490	170
GlyT	chr2R	23820408	23820523	116	*	GlyT	37955	2	0	2	1.59e-06	1.72e-05	down	-3.01539	Promoter (<=1kb)	2	23820354	23839864	19511	1	FBgn0034911	FBtr0301162	54
Nckx30C	chr2L	9712232	9712234	3	*	Nckx30C	7630	1	0	1	1.87e-07	5.58e-06	down	-3.01527	Promoter (<=1kb)	1	9708921	9711271	2351	2	FBgn0032138	FBtr0079848	-961
Tmtc3	chr2R	21126790	21126815	26	*	Tmtc3	35762	2	0	2	5.17e-09	9.44e-07	down	-3.01362	Promoter (<=1kb)	2	21123735	21127586	3852	2	FBgn0020312	FBtr0071638	771
SIFaR	chr3R	21282599	21282601	3	*	SIFaR	79060	1	0	1	3.02e-07	7.29e-06	down	-3.01313	Promoter (<=1kb)	4	21283197	21284050	854	1	FBgn0038879	FBtr0084056	-596
CG13579	chr2R	24455778	24455780	3	*	CG13579	38557	1	0	1	8.69e-08	3.71e-06	down	-3.01303	Promoter (<=1kb)	2	24455292	24490656	35365	1	FBgn0035010	FBtr0330230	486
KrT95D	chr3R	24031679	24031681	3	*	KrT95D	81416	1	0	1	1.54e-08	1.49e-06	down	-3.01044	Promoter (<=1kb)	4	23997538	24031827	34290	2	FBgn0020647	FBtr0084507	146
wor	chr2L	15424412	15424624	213	*	wor	11920	5	0	5	0.000131852	0.000285569	down	-3.00919	Promoter (<=1kb)	1	15423297	15425580	2284	2	FBgn0001983	FBtr0080740	956
CG43102	chr3R	17777049	17777157	109	*	CG43102	76218	2	0	2	5.98e-07	1.04e-05	down	-3.00882	Promoter (<=1kb)	4	17768272	17776320	8049	2	FBgn0262562	FBtr0305013	-729
tun	chr2R	15848937	15848939	3	*	tun	31584	1	0	1	7.81e-08	3.49e-06	down	-3.00767	Promoter (<=1kb)	2	15848579	15855645	7067	1	FBgn0034046	FBtr0308814	358
lncRNA:CR45054	chr3R	10084091	10084107	17	*	lncRNA:CR45054	70044	2	0	2	6.94e-07	1.12e-05	down	-3.00743	Promoter (<=1kb)	4	10083381	10090525	7145	1	FBgn0266414	FBtr0344594	710
Mtch	chr3L	184918	185242	325	*	Mtch	39360	3	1	2	6.5e-10	6.43e-07	down	-3.0066	Promoter (<=1kb)	3	184626	186310	1685	1	FBgn0027786	FBtr0305546	292
5-HT2B	chr3R	8578291	8578293	3	*	5-HT2B	68928	1	0	1	2.15e-06	1.99e-05	down	-3.00333	Promoter (<=1kb)	4	8578205	8629996	51792	1	FBgn0261929	FBtr0339322	86
Akap200	chr2L	8415911	8415913	3	*	Akap200	6684	1	0	1	1.78e-06	1.82e-05	down	-3.00254	Promoter (<=1kb)	1	8415743	8431297	15555	1	FBgn0027932	FBtr0340240	168
CG8441	chr2R	16185851	16186087	237	*	CG8441	31900	3	0	3	2.5e-08	1.92e-06	down	-3.00226	Promoter (<=1kb)	2	16185122	16186022	901	2	FBgn0034086	FBtr0087247	0
Hmt4-20	chrX	654168	654170	3	*	Hmt4-20	89279	1	0	1	9.86e-09	1.22e-06	down	-2.99905	Promoter (<=1kb)	6	648891	654938	6048	2	FBgn0025639	FBtr0308652	768
CG43732	chr3R	18950716	18950718	3	*	CG43732	77158	1	0	1	4.94e-09	9.13e-07	down	-2.99858	Promoter (<=1kb)	4	18950196	18976557	26362	1	FBgn0263983	FBtr0330024	520
ChAT	chr3R	18705781	18705914	134	*	ChAT	76982	3	0	3	7.65e-06	4.1e-05	down	-2.99781	Promoter (<=1kb)	4	18705501	18718916	13416	1	FBgn0270928	FBtr0083671	280
VAChT	chr3R	18705781	18705914	134	*	VAChT	76982	3	0	3	7.65e-06	4.1e-05	down	-2.99781	Promoter (<=1kb)	4	18705501	18718916	13416	1	FBgn0270928	FBtr0083671	280
mab-21	chrX	6012258	6012727	470	*	mab-21	93033	7	0	7	4.75e-06	3.1e-05	down	-2.99775	Promoter (<=1kb)	6	6008183	6013181	4999	2	FBgn0029003	FBtr0070890	454
Ctr1A	chrX	6661943	6661945	3	*	Ctr1A	93448	1	0	1	9.95e-10	6.43e-07	down	-2.9974	Promoter (<=1kb)	6	6661647	6668258	6612	1	FBgn0062413	FBtr0070951	296
Syx16	chrX	20393565	20393687	123	*	Syx16	102888	2	0	2	4.52e-09	8.9e-07	down	-2.99739	Promoter (<=1kb)	6	20392334	20393751	1418	2	FBgn0031106	FBtr0077330	64
Sh	chrX	18062492	18062494	3	*	Sh	101269	1	0	1	7.95e-08	3.52e-06	down	-2.99688	Promoter (<=1kb)	6	17932101	18063247	131147	2	FBgn0003380	FBtr0089661	753
lncRNA:CR43626	chr3L	3249299	3249776	478	*	lncRNA:CR43626	41911	5	0	5	2.46e-05	8.5e-05	down	-2.99522	Promoter (<=1kb)	3	3249340	3252400	3061	1	FBgn0263617	FBtr0309982	0
Shmt	chrX	5916012	5916302	291	*	Shmt	92953	3	0	3	4.35e-07	8.78e-06	down	-2.99516	Promoter (<=1kb)	6	5913067	5916317	3251	2	FBgn0029823	FBtr0345317	15
sqd	chr3R	13645683	13645940	258	*	sqd	72781	3	0	3	1.06e-08	1.26e-06	down	-2.9926	Promoter (<=1kb)	4	13635192	13646029	10838	2	FBgn0263396	FBtr0082856	89
l(2)k01209	chr2R	17420894	17421049	156	*	l(2)k01209	32847	2	0	2	2.23e-06	2.03e-05	down	-2.99174	Promoter (<=1kb)	2	17421377	17425679	4303	1	FBgn0022029	FBtr0086915	-328
GATAd	chr2L	10334393	10334529	137	*	GATAd	8115	2	0	2	3.01e-09	7.91e-07	down	-2.9916	Promoter (<=1kb)	1	10333914	10339185	5272	1	FBgn0032223	FBtr0333098	479
E(spl)malpha-BFM	chr3R	26011155	26011157	3	*	E(spl)malpha-BFM	83037	1	0	1	0.000129407	0.000281348	down	-2.98834	Promoter (<=1kb)	4	26010893	26011568	676	1	FBgn0002732	FBtr0084956	262
Lk6	chr3R	11764401	11764403	3	*	Lk6	71387	1	0	1	7.19e-09	1.09e-06	down	-2.98267	Promoter (<=1kb)	4	11750931	11764457	13527	2	FBgn0017581	FBtr0082534	54
lncRNA:roX2	chrX	11579549	11579725	177	*	lncRNA:roX2	96721	2	0	2	5.1e-07	9.55e-06	down	-2.9824	Promoter (<=1kb)	6	11579065	11580432	1368	1	FBgn0019660	FBtr0073515	484
bsk	chr2L	10250490	10250492	3	*	bsk	8040	1	0	1	1.14e-07	4.23e-06	down	-2.98076	Promoter (<=1kb)	1	10247502	10250501	3000	2	FBgn0000229	FBtr0080087	9
Su(H)	chr2L	15039618	15039620	3	*	Su(H)	11577	1	0	1	2.21e-06	2.03e-05	down	-2.98046	Promoter (<=1kb)	1	15039488	15043334	3847	1	FBgn0004837	FBtr0080700	130
CG31688	chr2L	20427146	20427148	3	*	CG31688	15401	1	0	1	5.82e-09	9.89e-07	down	-2.97932	Promoter (<=1kb)	1	20426199	20444823	18625	1	FBgn0263355	FBtr0308895	947
CG16798	chr2L	20382336	20382338	3	*	CG16798	15374	1	0	1	1.98e-08	1.68e-06	down	-2.97798	Promoter (<=1kb)	1	20376981	20382356	5376	2	FBgn0032856	FBtr0081371	18
CR46424	chr2L	21837246	21837413	168	*	CR46424	16413	2	0	2	8.05e-07	1.21e-05	down	-2.97786	Promoter (<=1kb)	1	21837085	21837434	350	2	FBgn0286927	FBtr0475184	21
CG9018	chr3L	2236558	2236683	126	*	CG9018	41189	2	0	2	1.49e-05	6.19e-05	down	-2.97634	Promoter (<=1kb)	3	2235284	2237076	1793	2	FBgn0035318	FBtr0072910	393
Asap	chr2R	8122826	8122828	3	*	Asap	25344	1	0	1	4.07e-09	8.44e-07	down	-2.97593	Promoter (<=1kb)	2	8114286	8123001	8716	2	FBgn0050372	FBtr0300954	173
Sox15	chr2R	14201606	14201608	3	*	Sox15	30324	1	0	1	6.28e-07	1.07e-05	down	-2.97542	Promoter (<=1kb)	2	14198478	14201249	2772	2	FBgn0033911	FBtr0087577	-357
Ald1	chr3R	26258962	26258964	3	*	Ald1	83234	1	0	1	1.11e-09	6.44e-07	down	-2.9754	Promoter (<=1kb)	4	26255204	26259213	4010	2	FBgn0000064	FBtr0310660	249
trio	chr3L	1023439	1023441	3	*	trio	40099	1	0	1	3.17e-06	2.45e-05	down	-2.97526	Promoter (<=1kb)	3	995982	1022889	26908	2	FBgn0024277	FBtr0072646	-550
CG9663	chr2L	3303099	3303101	3	*	CG9663	2439	1	0	1	2.32e-09	7.57e-07	down	-2.97285	Promoter (<=1kb)	1	3294926	3303130	8205	2	FBgn0031516	FBtr0077604	29
Hk	chrX	10244697	10244699	3	*	Hk	95834	1	0	1	2.01e-08	1.68e-06	down	-2.97114	Promoter (<=1kb)	6	10238246	10244580	6335	2	FBgn0263220	FBtr0331338	-117
CG31523	chr3R	4470664	4470666	3	*	CG31523	65628	1	0	1	2.12e-08	1.74e-06	down	-2.97065	Promoter (<=1kb)	4	4465421	4471279	5859	2	FBgn0051523	FBtr0345142	613
spri	chrX	10547637	10547639	3	*	spri	96004	1	0	1	3.04e-05	9.76e-05	down	-2.96918	Promoter (<=1kb)	6	10490537	10546754	56218	2	FBgn0085443	FBtr0112689	-883
ssp6	chr3L	6076995	6076997	3	*	ssp6	44005	1	0	1	2.97e-09	7.91e-07	down	-2.96742	Promoter (<=1kb)	3	6076722	6082491	5770	1	FBgn0035676	FBtr0345594	273
CoRest	chrX	19522584	19522586	3	*	CoRest	102243	1	0	1	1.05e-09	6.43e-07	down	-2.9631	Promoter (<=1kb)	6	19522099	19530896	8798	1	FBgn0261573	FBtr0302864	485
Strip	chr3L	3325519	3325668	150	*	Strip	41993	2	0	2	2.11e-08	1.73e-06	down	-2.96309	Promoter (<=1kb)	3	3322025	3325946	3922	2	FBgn0035437	FBtr0332058	278
lncRNA:CR44265	chr3R	21224009	21224011	3	*	lncRNA:CR44265	79005	1	0	1	8.19e-09	1.15e-06	down	-2.96147	Promoter (<=1kb)	4	21223704	21229512	5809	1	FBgn0038872	FBtr0339192	305
Nelf-A	chr3R	21224009	21224011	3	*	Nelf-A	79005	1	0	1	8.19e-09	1.15e-06	down	-2.96147	Promoter (<=1kb)	4	21223704	21229512	5809	1	FBgn0038872	FBtr0339192	305
CG11417	chrX	1354816	1354818	3	*	CG11417	89779	1	0	1	6.63e-05	0.000168809	down	-2.96143	Promoter (<=1kb)	6	1354014	1356473	2460	1	FBgn0024364	FBtr0070212	802
Tao	chrX	19579673	19579808	136	*	Tao	102279	2	0	2	3.27e-06	2.5e-05	down	-2.96035	Promoter (<=1kb)	6	19574785	19579740	4956	2	FBgn0031030	FBtr0309237	0
lncRNA:CR45541	chrX	9584272	9584274	3	*	lncRNA:CR45541	95434	1	0	1	5.65e-08	2.92e-06	down	-2.96019	Promoter (<=1kb)	6	9584177	9584575	399	1	FBgn0267101	FBtr0346177	95
CG8173	chrX	17708955	17709325	371	*	CG8173	101018	4	0	4	6.64e-09	1.05e-06	down	-2.96006	Promoter (<=1kb)	6	17707401	17709653	2253	2	FBgn0030864	FBtr0074475	328
snoRNA:Me28S-A992	chr2R	14623232	14623443	212	*	snoRNA:Me28S-A992	30640	3	0	3	4e-08	2.45e-06	down	-2.95894	Promoter (<=1kb)	2	14623276	14623346	71	1	FBgn0082941	FBtr0113507	0
Uhg5	chr2R	14623232	14623443	212	*	Uhg5	30640	3	0	3	4e-08	2.45e-06	down	-2.95894	Promoter (<=1kb)	2	14623276	14623346	71	1	FBgn0082941	FBtr0113507	0
Pfdn5	chr3R	22487333	22487504	172	*	Pfdn5	80066	2	0	2	3.06e-06	2.4e-05	down	-2.95882	Promoter (<=1kb)	4	22487201	22488035	835	1	FBgn0038976	FBtr0084257	132
kri	chr3L	5811140	5811240	101	*	kri	43798	2	0	2	5.61e-06	3.42e-05	down	-2.95841	Promoter (<=1kb)	3	5810973	5812228	1256	1	FBgn0035639	FBtr0310534	167
Arl6IP1	chr3R	16643741	16643743	3	*	Arl6IP1	75330	1	0	1	9.34e-07	1.31e-05	down	-2.95615	Promoter (<=1kb)	4	16643721	16645171	1451	1	FBgn0038453	FBtr0333728	20
CenG1A	chr2L	13879009	13879011	3	*	CenG1A	10660	1	0	1	1.91e-08	1.66e-06	down	-2.9546	Promoter (<=1kb)	1	13878957	13898256	19300	1	FBgn0028509	FBtr0080547	52
snoRNA:Me18S-G1620	chr2L	9894532	9894534	3	*	snoRNA:Me18S-G1620	7763	1	0	1	9.8e-09	1.22e-06	down	-2.95325	Promoter (<=1kb)	1	9894477	9894544	68	2	FBgn0063389	FBtr0079908	10
Uhg2	chr2L	9894532	9894534	3	*	Uhg2	7763	1	0	1	9.8e-09	1.22e-06	down	-2.95325	Promoter (<=1kb)	1	9894477	9894544	68	2	FBgn0063389	FBtr0079908	10
Dr	chr3R	29556406	29556408	3	*	Dr	85560	1	0	1	4.83e-08	2.67e-06	down	-2.95312	Promoter (<=1kb)	4	29556386	29565244	8859	1	FBgn0000492	FBtr0085441	20
Vap33	chrX	3949133	3949135	3	*	Vap33	91715	1	0	1	9.75e-08	3.91e-06	down	-2.95228	Promoter (<=1kb)	6	3949265	3955442	6178	1	FBgn0029687	FBtr0070618	-130
CG1648	chr2R	9819523	9819564	42	*	CG1648	26820	2	0	2	3.61e-07	8.02e-06	down	-2.95166	Promoter (<=1kb)	2	9810974	9820053	9080	2	FBgn0033446	FBtr0339403	489
asRNA:CR44266	chrX	11570658	11570660	3	*	asRNA:CR44266	96711	1	0	1	2.36e-09	7.66e-07	down	-2.95164	Promoter (<=1kb)	6	11570621	11571718	1098	1	FBgn0030311	FBtr0433504	37
CG11699	chrX	11570658	11570660	3	*	CG11699	96711	1	0	1	2.36e-09	7.66e-07	down	-2.95164	Promoter (<=1kb)	6	11570621	11571718	1098	1	FBgn0030311	FBtr0433504	37
CG13949	chr2L	856100	856322	223	*	CG13949	719	3	0	3	0.00107144	0.00158342	down	-2.95076	Promoter (<=1kb)	1	855471	856639	1169	1	FBgn0031288	FBtr0334796	629
CG42524	chr2R	15614332	15614334	3	*	CG42524	31388	1	0	1	1.68e-06	1.76e-05	down	-2.94784	Promoter (<=1kb)	2	15613854	15657214	43361	1	FBgn0260429	FBtr0340006	478
CG11000	chr3R	5802459	5802461	3	*	CG11000	66791	1	0	1	2.69e-08	1.98e-06	down	-2.94766	Promoter (<=1kb)	4	5802328	5813258	10931	1	FBgn0263353	FBtr0308953	131
dati	chr4	395557	395559	3	*	dati	88022	1	0	1	5.86e-08	2.98e-06	down	-2.94573	Promoter (<=1kb)	5	375640	395605	19966	2	FBgn0262636	FBtr0307043	46
colt	chr2L	2769884	2769990	107	*	colt	2051	2	0	2	3.56e-06	2.62e-05	down	-2.94566	Promoter (<=1kb)	1	2768618	2770066	1449	2	FBgn0019830	FBtr0077734	76
AsnS	chr3L	21173467	21173578	112	*	AsnS	55839	2	0	2	1.04e-06	1.38e-05	down	-2.9443	Promoter (<=1kb)	3	21173118	21174973	1856	1	FBgn0270926	FBtr0089463	349
chb	chr3L	21173467	21173578	112	*	chb	55839	2	0	2	1.04e-06	1.38e-05	down	-2.9443	Promoter (<=1kb)	3	21173118	21174973	1856	1	FBgn0270926	FBtr0089463	349
CG3735	chr2R	23939726	23939728	3	*	CG3735	38104	1	0	1	1.04e-09	6.43e-07	down	-2.9434	Promoter (<=1kb)	2	23937077	23939754	2678	2	FBgn0034933	FBtr0343280	26
nmo	chr3L	7979132	7979134	3	*	nmo	45449	1	0	1	6.28e-10	6.43e-07	down	-2.9432	Promoter (<=1kb)	3	7979046	8054147	75102	1	FBgn0011817	FBtr0333223	86
Vha26	chr3R	5591786	5591788	3	*	Vha26	66595	1	0	1	6.48e-07	1.08e-05	down	-2.9431	Promoter (<=1kb)	4	5591763	5595356	3594	1	FBgn0283535	FBtr0346137	23
Hs3st-A	chr2R	18719084	18719086	3	*	Hs3st-A	33919	1	0	1	2.78e-07	6.98e-06	down	-2.94262	Promoter (<=1kb)	2	18718114	18754675	36562	1	FBgn0053147	FBtr0345672	970
2022-09-02	chr3R	20588321	20588323	3	*	2022-09-02	78441	1	0	1	5.45e-08	2.85e-06	down	-2.94131	Promoter (<=1kb)	4	20586129	20588356	2228	2	FBgn0014029	FBtr0083945	33
asRNA:CR46044	chr3R	20588321	20588323	3	*	asRNA:CR46044	78441	1	0	1	5.45e-08	2.85e-06	down	-2.94131	Promoter (<=1kb)	4	20586129	20588356	2228	2	FBgn0014029	FBtr0083945	33
Rgl	chr3L	13919135	13919137	3	*	Rgl	50130	1	0	1	3.93e-10	6.43e-07	down	-2.94093	Promoter (<=1kb)	3	13906897	13919965	13069	2	FBgn0026376	FBtr0075793	828
a6	chrX	1695667	1695669	3	*	a6	90093	1	0	1	8.12e-08	3.57e-06	down	-2.94058	Promoter (<=1kb)	6	1693615	1695889	2275	2	FBgn0023130	FBtr0070279	220
Arc2	chr2R	14362170	14362352	183	*	Arc2	30474	2	0	2	6.18e-09	1.01e-06	down	-2.94019	Promoter (<=1kb)	2	14361924	14362825	902	1	FBgn0033928	FBtr0087547	246
lncRNA:CR46024	chr3R	14841139	14841141	3	*	lncRNA:CR46024	73794	1	0	1	4.48e-07	8.89e-06	down	-2.93895	Promoter (<=1kb)	4	14840749	14841360	612	2	FBgn0267688	FBtr0347180	219
CG10565	chr3L	21135674	21135676	3	*	CG10565	55826	1	0	1	3.42e-06	2.56e-05	down	-2.93894	Promoter (<=1kb)	3	21133250	21136052	2803	2	FBgn0037051	FBtr0078323	376
CG13739	chr2R	9351628	9351630	3	*	CG13739	26413	1	0	1	2.8e-08	2.02e-06	down	-2.93631	Promoter (<=1kb)	2	9309296	9351655	42360	2	FBgn0033403	FBtr0088558	25
CG13954	chr2R	9351628	9351630	3	*	CG13954	26413	1	0	1	2.8e-08	2.02e-06	down	-2.93631	Promoter (<=1kb)	2	9309296	9351655	42360	2	FBgn0033403	FBtr0088558	25
SP2353	chr2R	16032166	16032168	3	*	SP2353	31765	1	0	1	3.23e-08	2.19e-06	down	-2.93386	Promoter (<=1kb)	2	16031930	16047243	15314	1	FBgn0034070	FBtr0340019	236
CG8777	chr2R	9098624	9098626	3	*	CG8777	26237	1	0	1	3.6e-07	8e-06	down	-2.93385	Promoter (<=1kb)	2	9098539	9103153	4615	1	FBgn0033376	FBtr0088565	85
Mvb12	chrX	18101177	18101244	68	*	Mvb12	101303	2	0	2	8.72e-07	1.26e-05	down	-2.93215	Promoter (<=1kb)	6	18097558	18101314	3757	2	FBgn0030894	FBtr0074527	70
put	chr3R	14625231	14625233	3	*	put	73614	1	0	1	4.97e-08	2.7e-06	down	-2.93169	Promoter (<=1kb)	4	14619030	14625703	6674	2	FBgn0003169	FBtr0334030	470
TppII	chr2R	13158311	13158313	3	*	TppII	29557	1	0	1	5.13e-07	9.6e-06	down	-2.93076	Promoter (<=1kb)	2	13152885	13158297	5413	2	FBgn0020370	FBtr0339755	-14
asRNA:CR44116	chr2L	8196248	8196314	67	*	asRNA:CR44116	6472	2	0	2	2.1e-05	7.65e-05	down	-2.93012	Promoter (<=1kb)	1	8190808	8196918	6111	2	FBgn0031995	FBtr0335186	604
CG8475	chr2L	8196248	8196314	67	*	CG8475	6472	2	0	2	2.1e-05	7.65e-05	down	-2.93012	Promoter (<=1kb)	1	8190808	8196918	6111	2	FBgn0031995	FBtr0335186	604
slgA	chrX	21374775	21374777	3	*	slgA	103517	1	0	1	6.28e-10	6.43e-07	down	-2.92911	Promoter (<=1kb)	6	21374767	21385159	10393	1	FBgn0003423	FBtr0307526	8
CG3732	chr2R	22640076	22640078	3	*	CG3732	36925	1	0	1	2.77e-06	2.28e-05	down	-2.92907	Promoter (<=1kb)	2	22638807	22640201	1395	2	FBgn0034750	FBtr0071936	123
CG32845	chr3L	271983	271985	3	*	CG32845	39451	1	0	1	4.19e-08	2.49e-06	down	-2.92764	Promoter (<=1kb)	3	271638	275018	3381	1	FBgn0029002	FBtr0332837	345
miple2	chr3L	271983	271985	3	*	miple2	39451	1	0	1	4.19e-08	2.49e-06	down	-2.92764	Promoter (<=1kb)	3	271638	275018	3381	1	FBgn0029002	FBtr0332837	345
asRNA:CR43425	chr4	867999	868224	226	*	asRNA:CR43425	88434	3	0	3	3.2e-07	7.54e-06	down	-2.92708	Promoter (<=1kb)	5	867824	871426	3603	1	FBgn0263344	FBtr0308778	175
bru3	chr3L	13802484	13802486	3	*	bru3	50048	1	0	1	6.72e-09	1.06e-06	down	-2.92497	Promoter (<=1kb)	3	13537937	13803400	265464	2	FBgn0264001	FBtr0330357	914
emc	chr3L	749853	750105	253	*	emc	39887	3	0	3	2.63e-08	1.96e-06	down	-2.92497	Promoter (<=1kb)	3	749400	753492	4093	1	FBgn0000575	FBtr0072578	453
hng3	chr3L	749853	750105	253	*	hng3	39887	3	0	3	2.63e-08	1.96e-06	down	-2.92497	Promoter (<=1kb)	3	749400	753492	4093	1	FBgn0000575	FBtr0072578	453
CG11873	chr3R	29064604	29064606	3	*	CG11873	85158	1	0	1	2.35e-09	7.65e-07	down	-2.92413	Promoter (<=1kb)	4	29063828	29108948	45121	1	FBgn0039633	FBtr0330301	776
Nup50	chr2R	8123290	8123292	3	*	Nup50	25345	1	0	1	1.08e-06	1.4e-05	down	-2.92382	Promoter (<=1kb)	2	8123036	8125058	2023	1	FBgn0033264	FBtr0088783	254
Eig71Ee	chr3L	15655914	15655916	3	*	Eig71Ee	51452	1	0	1	0.000187245	0.000376185	down	-2.92296	Promoter (<=1kb)	3	15654472	15656010	1539	2	FBgn0004592	FBtr0075585	94
RN-tre	chr2R	13990605	13990607	3	*	RN-tre	30217	1	0	1	2.37e-06	2.1e-05	down	-2.92214	Promoter (<=1kb)	2	13984815	13990707	5893	2	FBgn0020620	FBtr0087603	100
jumu	chr3R	10350337	10350490	154	*	jumu	70259	2	0	2	1e-08	1.22e-06	down	-2.91951	Promoter (<=1kb)	4	10350182	10361612	11431	1	FBgn0015396	FBtr0082237	155
Reph	chr2L	3806196	3806198	3	*	Reph	2892	1	0	1	1.41e-06	1.61e-05	down	-2.91822	Promoter (<=1kb)	1	3805682	3808895	3214	1	FBgn0021800	FBtr0077498	514
ras	chrX	10745563	10745727	165	*	ras	96124	3	0	3	8.64e-08	3.7e-06	down	-2.91777	Promoter (<=1kb)	6	10745434	10748806	3373	1	FBgn0003204	FBtr0474163	129
mAChR-B	chr3R	8059972	8059974	3	*	mAChR-B	68503	1	0	1	3.91e-08	2.42e-06	down	-2.91691	Promoter (<=1kb)	4	8059285	8087049	27765	1	FBgn0037546	FBtr0344726	687
lncRNA:CR44632	chr2R	20085714	20085716	3	*	lncRNA:CR44632	34900	1	0	1	5.65e-07	1.01e-05	down	-2.91675	Promoter (<=1kb)	2	20084960	20086695	1736	1	FBgn0265843	FBtr0342684	754
Neb-cGP	chrX	10461326	10461387	62	*	Neb-cGP	95961	2	0	2	7.43e-06	4.03e-05	down	-2.91263	Promoter (<=1kb)	6	10460736	10461878	1143	1	FBgn0083167	FBtr0332952	590
RpS30	chr3R	20851024	20851026	3	*	RpS30	78670	1	0	1	0.000672189	0.00106945	down	-2.91255	Promoter (<=1kb)	4	20850834	20851427	594	1	FBgn0038834	FBtr0083970	190
CG3223	chr3R	8009552	8009707	156	*	CG3223	68466	2	0	2	8.92e-06	4.48e-05	down	-2.9125	Promoter (<=1kb)	4	8009400	8011018	1619	1	FBgn0037538	FBtr0081785	152
nop5	chr2L	6917587	6917589	3	*	nop5	5364	1	0	1	0.000147537	0.00031167	down	-2.91051	Promoter (<=1kb)	1	6917210	6917310	101	2	FBgn0263467	FBtr0309766	-277
x16	chr2L	6917587	6917589	3	*	x16	5364	1	0	1	0.000147537	0.00031167	down	-2.91051	Promoter (<=1kb)	1	6917210	6917310	101	2	FBgn0263467	FBtr0309766	-277
CG8712	chr2R	8098102	8098140	39	*	CG8712	25320	2	0	2	3.04e-07	7.33e-06	down	-2.9087	Promoter (<=1kb)	2	8096792	8098484	1693	2	FBgn0033258	FBtr0088823	344
Rm62	chr3R	6007149	6007151	3	*	Rm62	66936	1	0	1	8.08e-07	1.22e-05	down	-2.90559	Promoter (<=1kb)	4	6000431	6007728	7298	2	FBgn0003261	FBtr0078654	577
GlcAT-I	chrX	4131328	4131330	3	*	GlcAT-I	91837	1	0	1	6.73e-08	3.19e-06	down	-2.9049	Promoter (<=1kb)	6	4131211	4132833	1623	1	FBgn0066114	FBtr0070644	117
brk	chrX	7307971	7308261	291	*	brk	93859	3	0	3	4.67e-06	3.07e-05	down	-2.90465	Promoter (<=1kb)	6	7307939	7311132	3194	1	FBgn0024250	FBtr0071048	32
CG6610	chr3L	6075923	6075925	3	*	CG6610	44004	1	0	1	3.36e-08	2.22e-06	down	-2.9046	Promoter (<=1kb)	3	6075536	6076258	723	1	FBgn0035675	FBtr0332060	387
udd	chr2R	8107340	8107342	3	*	udd	25335	1	0	1	8.58e-05	0.000205368	down	-2.90456	Promoter (<=1kb)	2	8106385	8113949	7565	1	FBgn0033261	FBtr0347555	955
egh	chrX	2588582	2588584	3	*	egh	90879	1	0	1	3.94e-08	2.43e-06	down	-2.9045	Promoter (<=1kb)	6	2588503	2598627	10125	1	FBgn0001404	FBtr0070439	79
shep	chr3L	5184697	5184699	3	*	shep	43394	1	0	1	5.48e-08	2.86e-06	down	-2.90284	Promoter (<=1kb)	3	5155821	5184797	28977	2	FBgn0052423	FBtr0333288	98
ago	chr3L	4254284	4254286	3	*	ago	42743	1	0	1	7.15e-07	1.14e-05	down	-2.90229	Promoter (<=1kb)	3	4246343	4254306	7964	2	FBgn0041171	FBtr0073245	20
rump	chr3R	9510274	9510276	3	*	rump	69571	1	0	1	9.9e-07	1.35e-05	down	-2.90145	Promoter (<=1kb)	4	9505853	9510324	4472	2	FBgn0267790	FBtr0082123	48
CG14879	chr3R	16348483	16348485	3	*	CG14879	75078	1	0	1	3.96e-07	8.35e-06	down	-2.90104	Promoter (<=1kb)	4	16345825	16349226	3402	2	FBgn0038419	FBtr0334733	741
Lnpk	chr2R	8599631	8599848	218	*	Lnpk	25778	3	0	3	9.48e-08	3.88e-06	down	-2.89978	Promoter (<=1kb)	2	8596972	8599962	2991	2	FBgn0033309	FBtr0339357	114
dpr5	chr3R	11500672	11500674	3	*	dpr5	71150	1	0	1	7.9e-09	1.14e-06	down	-2.89956	Promoter (<=1kb)	4	11501070	11505951	4882	1	FBgn0037908	FBtr0082395	-396
CG31324	chr3R	26124608	26124610	3	*	CG31324	83157	1	0	1	3.05e-09	7.91e-07	down	-2.89883	Promoter (<=1kb)	4	26124809	26125423	615	2	FBgn0267729	FBtr0347307	813
mIF3	chr2R	12322235	12322334	100	*	mIF3	28828	2	1	1	1.35e-05	5.78e-05	down	-2.89721	Promoter (<=1kb)	2	12321238	12322797	1560	1	FBgn0033712	FBtr0339628	997
bgcn	chr2R	23858915	23858917	3	*	bgcn	38000	1	0	1	6.45e-06	3.71e-05	down	-2.89719	Promoter (<=1kb)	2	23853270	23858921	5652	2	FBgn0004581	FBtr0072232	4
Sema1b	chr2R	17683345	17683477	133	*	Sema1b	33109	3	0	3	0.000171754	0.000350916	down	-2.89622	Promoter (<=1kb)	2	17672839	17683499	10661	2	FBgn0016059	FBtr0086890	22
calypso	chr2R	16196314	16196378	65	*	calypso	31903	2	0	2	1.65e-06	1.75e-05	down	-2.89557	Promoter (<=1kb)	2	16194062	16196333	2272	2	FBgn0262166	FBtr0087245	0
HERC2	chrX	20394636	20394638	3	*	HERC2	102889	1	0	1	2.98e-09	7.91e-07	down	-2.89506	Promoter (<=1kb)	6	20394395	20412247	17853	1	FBgn0031107	FBtr0301344	241
h	chr3L	8675754	8675894	141	*	h	46101	2	0	2	1.36e-06	1.58e-05	down	-2.8938	Promoter (<=1kb)	3	8675759	8679253	3495	1	FBgn0001168	FBtr0100153	0
tRNA:His-GTG-1-4	chr2R	12336424	12336426	3	*	tRNA:His-GTG-1-4	28841	1	0	1	5.52e-10	6.43e-07	down	-2.89374	Promoter (<=1kb)	2	12336418	12336489	72	1	FBgn0011878	FBtr0087900	6
Vsx1	chrX	5594589	5594591	3	*	Vsx1	92680	1	0	1	2.18e-06	2.01e-05	down	-2.89364	Promoter (<=1kb)	6	5594255	5612865	18611	1	FBgn0263511	FBtr0340495	334
CG30467	chr2R	15538073	15538310	238	*	CG30467	31316	4	0	4	2.14e-07	5.99e-06	down	-2.89301	Promoter (<=1kb)	2	15538175	15540014	1840	1	FBgn0050467	FBtr0087334	0
hkb	chr3R	4346628	4346630	3	*	hkb	65532	1	0	1	8.66e-05	0.000206893	down	-2.89236	Promoter (<=1kb)	4	4345015	4346646	1632	2	FBgn0261434	FBtr0078951	16
LPCAT	chrX	9579207	9579363	157	*	LPCAT	95428	3	0	3	7.51e-07	1.17e-05	down	-2.89226	Promoter (<=1kb)	6	9571537	9579987	8451	2	FBgn0052699	FBtr0110850	624
CG12194	chr2L	4838831	4838833	3	*	CG12194	3745	1	0	1	6.35e-07	1.07e-05	down	-2.89164	Promoter (<=1kb)	1	4838462	4841465	3004	1	FBgn0031636	FBtr0332476	369
vari	chr2L	20796092	20796094	3	*	vari	15651	1	0	1	1.91e-08	1.66e-06	down	-2.88921	Promoter (<=1kb)	1	20788662	20797042	8381	2	FBgn0250785	FBtr0089945	948
lncRNA:acal	chr2R	10547056	10547058	3	*	lncRNA:acal	27481	1	0	1	3.26e-07	7.6e-06	down	-2.88913	Promoter (<=1kb)	2	10544925	10547260	2336	2	FBgn0283426	FBtr0445179	202
Drat	chr2R	7532557	7532559	3	*	Drat	24820	1	0	1	8.54e-10	6.43e-07	down	-2.88859	Promoter (<=1kb)	2	7526118	7532981	6864	2	FBgn0033188	FBtr0088956	422
lncRNA:CR45542	chrX	9590368	9590835	468	*	lncRNA:CR45542	95442	4	0	4	3.35e-06	2.53e-05	down	-2.88766	Promoter (<=1kb)	6	9590093	9590619	527	2	FBgn0267102	FBtr0346179	0
Kdm4B	chr2R	13190987	13190989	3	*	Kdm4B	29585	1	0	1	6.45e-08	3.12e-06	down	-2.88745	Promoter (<=1kb)	2	13185534	13190086	4553	2	FBgn0053182	FBtr0302053	-901
CG31029	chr3R	30132058	30132346	289	*	CG31029	86107	3	0	3	2.14e-06	1.99e-05	down	-2.88643	Promoter (<=1kb)	4	30129279	30132395	3117	2	FBgn0051029	FBtr0085585	49
lncRNA:cherub	chr3R	11255271	11255409	139	*	lncRNA:cherub	70963	3	0	3	4.63e-07	9.03e-06	down	-2.88624	Promoter (<=1kb)	4	11247631	11256123	8493	2	FBgn0262972	FBtr0306729	714
Ktl	chr3R	20896326	20896328	3	*	Ktl	78696	1	0	1	5.67e-08	2.92e-06	down	-2.88584	Promoter (<=1kb)	4	20894452	20897320	2869	2	FBgn0038839	FBtr0083986	992
C3G	chrX	6802947	6802949	3	*	C3G	93547	1	0	1	1.22e-07	4.41e-06	down	-2.88462	Promoter (<=1kb)	6	6780790	6803593	22804	2	FBgn0259228	FBtr0299791	644
shn	chr2R	11198284	11198286	3	*	shn	27829	1	0	1	4.37e-06	2.95e-05	down	-2.88435	Promoter (<=1kb)	2	11198276	11217394	19119	1	FBgn0003396	FBtr0088099	8
CG6769	chrX	17861139	17861141	3	*	CG6769	101122	1	0	1	1.63e-06	1.74e-05	down	-2.88353	Promoter (<=1kb)	6	17861002	17862775	1774	1	FBgn0030878	FBtr0334034	137
CG3337	chr3R	21223457	21223459	3	*	CG3337	79004	1	0	1	7.9e-06	4.18e-05	down	-2.88314	Promoter (<=1kb)	4	21220704	21223584	2881	2	FBgn0038871	FBtr0347217	125
CG2258	chrX	8100065	8100067	3	*	CG2258	94431	1	0	1	2.79e-08	2.02e-06	down	-2.8828	Promoter (<=1kb)	6	8094250	8100071	5822	2	FBgn0029997	FBtr0071110	4
CG6693	chr3R	11221154	11221272	119	*	CG6693	70927	2	0	2	7.44e-05	0.00018418	down	-2.88221	Promoter (<=1kb)	4	11220268	11221517	1250	2	FBgn0037878	FBtr0336784	245
CG42784	chr2L	13458124	13458126	3	*	CG42784	10443	1	0	1	4.22e-09	8.52e-07	down	-2.88211	Promoter (<=1kb)	1	13458290	13458605	316	2	FBgn0267244	FBtr0346425	479
Btk29A	chr2L	8295581	8295660	80	*	Btk29A	6566	2	0	2	7.24e-07	1.15e-05	down	-2.88075	Promoter (<=1kb)	1	8295158	8295666	509	1	FBgn0264083	FBtr0330691	423
lncRNA:CR43752	chr2L	8295581	8295660	80	*	lncRNA:CR43752	6566	2	0	2	7.24e-07	1.15e-05	down	-2.88075	Promoter (<=1kb)	1	8295158	8295666	509	1	FBgn0264083	FBtr0330691	423
asRNA:CR43820	chr2L	5062998	5063000	3	*	asRNA:CR43820	3947	1	0	1	5.18e-07	9.63e-06	down	-2.88009	Promoter (<=1kb)	1	5062972	5070750	7779	1	FBgn0028572	FBtr0332215	26
qtc	chr2L	5062998	5063000	3	*	qtc	3947	1	0	1	5.18e-07	9.63e-06	down	-2.88009	Promoter (<=1kb)	1	5062972	5070750	7779	1	FBgn0028572	FBtr0332215	26
Stim	chrX	15940269	15940271	3	*	Stim	99654	1	0	1	9.8e-07	1.34e-05	down	-2.87988	Promoter (<=1kb)	6	15934495	15940451	5957	2	FBgn0045073	FBtr0303567	180
CG6683	chr3L	8514093	8514095	3	*	CG6683	45898	1	0	1	3.66e-07	8.05e-06	down	-2.87985	Promoter (<=1kb)	3	8513874	8514921	1048	2	FBgn0035902	FBtr0076655	826
CG6765	chr3L	8514093	8514095	3	*	CG6765	45898	1	0	1	3.66e-07	8.05e-06	down	-2.87985	Promoter (<=1kb)	3	8513874	8514921	1048	2	FBgn0035902	FBtr0076655	826
RpL36	chrX	629280	629282	3	*	RpL36	89252	1	0	1	4.77e-08	2.66e-06	down	-2.87834	Promoter (<=1kb)	6	628349	629416	1068	2	FBgn0002579	FBtr0070156	134
His2B:CG33908	chr2L	21428349	21428351	3	*	His2B:CG33908	16151	1	0	1	0.00103661	0.00153896	down	-2.87608	Promoter (<=1kb)	1	21428075	21428669	595	2	FBgn0053908	FBtr0091912	318
fs(1)K10	chrX	2242222	2242224	3	*	fs(1)K10	90587	1	0	1	1.11e-08	1.28e-06	down	-2.87587	Promoter (<=1kb)	6	2242138	2246041	3904	1	FBgn0000810	FBtr0070396	84
CG9921	chrX	16333380	16333382	3	*	CG9921	99941	1	0	1	4.56e-09	8.9e-07	down	-2.87493	Promoter (<=1kb)	6	16331281	16333600	2320	2	FBgn0030743	FBtr0333303	218
CG4467	chr3R	23248256	23248258	3	*	CG4467	80663	1	0	1	1.08e-09	6.43e-07	down	-2.87224	Promoter (<=1kb)	4	23227727	23248903	21177	2	FBgn0039064	FBtr0110801	645
arm	chrX	1898842	1898844	3	*	arm	90255	1	0	1	4.54e-10	6.43e-07	down	-2.87096	Promoter (<=1kb)	6	1891401	1899524	8124	2	FBgn0000117	FBtr0089988	680
asRNA:CR45611	chrX	21374160	21374162	3	*	asRNA:CR45611	103516	1	0	1	6.79e-09	1.06e-06	down	-2.87	Promoter (<=1kb)	6	21374312	21384289	9978	1	FBgn0003423	FBtr0077203	-150
Cds	chr3L	8128140	8128242	103	*	Cds	45530	2	0	2	1.81e-05	6.97e-05	down	-2.86973	Promoter (<=1kb)	3	8128054	8131675	3622	1	FBgn0010350	FBtr0076688	86
rin	chr3R	13648481	13648483	3	*	rin	72784	1	0	1	1.44e-07	4.87e-06	down	-2.86968	Promoter (<=1kb)	4	13648822	13652413	3592	1	FBgn0015778	FBtr0346346	-339
DnaJ-1	chr3L	5751799	5751801	3	*	DnaJ-1	43748	1	0	1	4.72e-09	9e-07	down	-2.86874	Promoter (<=1kb)	3	5750029	5752189	2161	2	FBgn0263106	FBtr0077123	388
CG7130	chr3L	22075239	22075264	26	*	CG7130	56662	2	0	2	1.61e-05	6.5e-05	down	-2.86864	Promoter (<=1kb)	3	22075056	22075756	701	2	FBgn0037151	FBtr0078484	492
KP78a	chr3R	11352305	11352384	80	*	KP78a	71032	2	0	2	8.44e-07	1.24e-05	down	-2.86753	Promoter (<=1kb)	4	11346294	11353131	6838	2	FBgn0026063	FBtr0301427	747
KP78b	chr3R	11352305	11352384	80	*	KP78b	71032	2	0	2	8.44e-07	1.24e-05	down	-2.86753	Promoter (<=1kb)	4	11346294	11353131	6838	2	FBgn0026063	FBtr0301427	747
CG4313	chrX	2050464	2050466	3	*	CG4313	90364	1	0	1	0.000274719	0.000511549	down	-2.86671	Promoter (<=1kb)	6	2044292	2050120	5829	2	FBgn0025631	FBtr0303045	-344
mam	chr2R	14005905	14005907	3	*	mam	30229	1	0	1	8.74e-08	3.71e-06	down	-2.86611	Promoter (<=1kb)	2	14005860	14006006	147	2	FBgn0263539	FBtr0309640	99
mir-4978	chr2R	14005905	14005907	3	*	mir-4978	30229	1	0	1	8.74e-08	3.71e-06	down	-2.86611	Promoter (<=1kb)	2	14005860	14006006	147	2	FBgn0263539	FBtr0309640	99
rad	chrX	13035029	13035031	3	*	rad	97668	1	0	1	1.02e-07	4e-06	down	-2.86403	Promoter (<=1kb)	6	13034735	13079070	44336	1	FBgn0265597	FBtr0340355	294
corto	chr3R	5086706	5086708	3	*	corto	66176	1	0	1	2.08e-09	7.57e-07	down	-2.86323	Promoter (<=1kb)	4	5083176	5086712	3537	2	FBgn0010313	FBtr0308118	4
CG30343	chr2R	9252059	9252061	3	*	CG30343	26361	1	0	1	1.69e-07	5.27e-06	down	-2.86302	Promoter (<=1kb)	2	9252021	9253255	1235	1	FBgn0050343	FBtr0308205	38
Git	chr2R	10645028	10645067	40	*	Git	27531	3	0	3	3.17e-05	0.000100358	down	-2.86271	Promoter (<=1kb)	2	10641818	10645427	3610	2	FBgn0033539	FBtr0088258	360
igl	chr2R	15156162	15156164	3	*	igl	30989	1	0	1	3.48e-09	8.16e-07	down	-2.86101	Promoter (<=1kb)	2	15155437	15190292	34856	1	FBgn0013467	FBtr0332267	725
MFS3	chr2L	1147278	1147280	3	*	MFS3	961	1	0	1	5.94e-08	3e-06	down	-2.86088	Promoter (<=1kb)	1	1147822	1149449	1628	1	FBgn0283525	FBtr0077959	-542
CG7630	chr3L	17425825	17425972	148	*	CG7630	52933	2	0	2	1.72e-05	6.77e-05	down	-2.86022	Promoter (<=1kb)	3	17425477	17426282	806	1	FBgn0040793	FBtr0075217	348
FoxP	chr3R	9729911	9729913	3	*	FoxP	69766	1	0	1	1.21e-07	4.38e-06	down	-2.85924	Promoter (<=1kb)	4	9727151	9730275	3125	2	FBgn0262477	FBtr0329937	362
Tet	chr3L	2821017	2821019	3	*	Tet	41621	1	0	1	4.53e-07	8.94e-06	down	-2.85904	Promoter (<=1kb)	3	2786207	2821103	34897	2	FBgn0263392	FBtr0309120	84
CG8405	chr2R	16047700	16047738	39	*	CG8405	31777	2	0	2	0.000169704	0.000347606	down	-2.85688	Promoter (<=1kb)	2	16047648	16060835	13188	1	FBgn0034071	FBtr0340020	52
MTPAP	chrX	1349122	1349308	187	*	MTPAP	89774	2	0	2	9.57e-09	1.22e-06	down	-2.85671	Promoter (<=1kb)	6	1344872	1349357	4486	2	FBgn0024360	FBtr0070236	49
caz	chrX	16289290	16289381	92	*	caz	99895	2	0	2	4.63e-07	9.02e-06	down	-2.85366	Promoter (<=1kb)	6	16288810	16293520	4711	1	FBgn0285954	FBtr0334992	480
lncRNA:CR43990	chr3L	10412074	10412089	16	*	lncRNA:CR43990	47449	2	0	2	2.07e-07	5.88e-06	down	-2.85312	Promoter (<=1kb)	3	10411907	10412377	471	2	FBgn0264722	FBtr0334101	288
FASN1	chr2L	3057884	3058064	181	*	FASN1	2293	2	0	2	1.08e-07	4.1e-06	down	-2.85304	Promoter (<=1kb)	1	3056989	3068177	11189	1	FBgn0283427	FBtr0335387	895
CG43901	chrX	10906081	10906154	74	*	CG43901	96262	2	0	2	4.6e-08	2.62e-06	down	-2.85291	Promoter (<=1kb)	6	10905767	10923436	17670	1	FBgn0264502	FBtr0332932	314
alpha-Man-Ia	chrX	10325286	10325288	3	*	alpha-Man-Ia	95863	1	0	1	5.14e-09	9.41e-07	down	-2.85275	Promoter (<=1kb)	6	10266792	10325958	59167	2	FBgn0259170	FBtr0300511	670
Epac	chr2R	6798648	6798650	3	*	Epac	24218	1	0	1	4.84e-07	9.27e-06	down	-2.85241	Promoter (<=1kb)	2	6759715	6798941	39227	2	FBgn0085421	FBtr0329849	291
Hsp22	chr3L	9373196	9373225	30	*	Hsp22	46717	2	0	2	2.65e-06	2.23e-05	down	-2.84858	Promoter (<=1kb)	3	9372931	9374964	2034	1	FBgn0001228	FBtr0100655	265
CASK	chr3R	21807262	21807264	3	*	CASK	79525	1	0	1	1.41e-08	1.4e-06	down	-2.84843	Promoter (<=1kb)	4	21785925	21807902	21978	2	FBgn0013759	FBtr0084162	638
CG46310	chr3R	23178260	23178262	3	*	CG46310	80617	1	0	1	0.00102696	0.00152643	down	-2.84843	Promoter (<=1kb)	4	23178617	23185642	7026	1	FBgn0265042	FBtr0336473	-355
Irk1	chr3R	23178260	23178262	3	*	Irk1	80617	1	0	1	0.00102696	0.00152643	down	-2.84843	Promoter (<=1kb)	4	23178617	23185642	7026	1	FBgn0265042	FBtr0336473	-355
Galphas	chr2R	23943127	23943129	3	*	Galphas	38109	1	0	1	7.1e-09	1.09e-06	down	-2.84712	Promoter (<=1kb)	2	23942538	23946936	4399	1	FBgn0001123	FBtr0301411	589
Tudor-SN	chr3L	263894	263896	3	*	Tudor-SN	39442	1	0	1	3.88e-09	8.32e-07	down	-2.84682	Promoter (<=1kb)	3	259043	264380	5338	2	FBgn0035121	FBtr0332107	484
miple1	chr3L	268415	268417	3	*	miple1	39446	1	0	1	9.66e-09	1.22e-06	down	-2.84446	Promoter (<=1kb)	3	267764	270336	2573	1	FBgn0027111	FBtr0072505	651
Lis-1	chr2R	16180197	16180199	3	*	Lis-1	31899	1	0	1	1.21e-08	1.33e-06	down	-2.84441	Promoter (<=1kb)	2	16179333	16185103	5771	1	FBgn0015754	FBtr0087240	864
HSPBAP1	chr3R	27695280	27695282	3	*	HSPBAP1	84255	1	0	1	1.63e-06	1.73e-05	down	-2.84371	Promoter (<=1kb)	4	27695235	27696531	1297	1	FBgn0263025	FBtr0306924	45
Ino80	chr3R	19403094	19403096	3	*	Ino80	77611	1	0	1	1.04e-05	4.94e-05	down	-2.84158	Promoter (<=1kb)	4	19368995	19403153	34159	2	FBgn0086613	FBtr0083771	57
hang	chrX	16423001	16423003	3	*	hang	100022	1	0	1	7.92e-08	3.52e-06	down	-2.84053	Promoter (<=1kb)	6	16422831	16438454	15624	1	FBgn0026575	FBtr0343571	170
CG14618	chrX	22473806	22473808	3	*	CG14618	104148	1	0	1	1.36e-05	5.82e-05	down	-2.83969	Promoter (<=1kb)	6	22473698	22474998	1301	1	FBgn0031189	FBtr0077351	108
Dpy-30L1	chr2L	10732740	10732742	3	*	Dpy-30L1	8435	1	0	1	1.11e-08	1.27e-06	down	-2.83807	Promoter (<=1kb)	1	10732653	10733307	655	1	FBgn0032293	FBtr0080112	87
sty	chr3L	3411747	3411749	3	*	sty	42091	1	0	1	2.21e-09	7.57e-07	down	-2.83787	Promoter (<=1kb)	3	3412145	3412251	107	2	FBgn0262260	FBtr0304359	502
dpr14	chrX	7906729	7906926	198	*	dpr14	94286	3	0	3	0.000743212	0.0011632	down	-2.83664	Promoter (<=1kb)	6	7905647	7907814	2168	2	FBgn0029974	FBtr0071134	888
beat-VI	chr3R	28428897	28429086	190	*	beat-VI	84659	2	0	2	5.51e-08	2.87e-06	down	-2.83659	Promoter (<=1kb)	4	28427094	28427990	897	2	FBgn0267775	FBtr0347339	-907
Tim8	chrX	11368722	11368914	193	*	Tim8	96586	2	0	2	1.89e-06	1.87e-05	down	-2.83628	Promoter (<=1kb)	6	11368445	11369283	839	1	FBgn0027359	FBtr0343640	277
GstZ1	chr3R	9456388	9456390	3	*	GstZ1	69522	1	0	1	1.05e-05	4.96e-05	down	-2.83572	Promoter (<=1kb)	4	9455517	9456546	1030	2	FBgn0037696	FBtr0082044	156
Gbeta13F	chrX	15860946	15860948	3	*	Gbeta13F	99582	1	0	1	1.95e-07	5.69e-06	down	-2.83572	Promoter (<=1kb)	6	15860706	15863169	2464	1	FBgn0001105	FBtr0346794	240
Cam	chr2R	12259456	12259458	3	*	Cam	28761	1	0	1	7.12e-09	1.09e-06	down	-2.83412	Promoter (<=1kb)	2	12259409	12260813	1405	1	FBgn0264501	FBtr0332931	47
lncRNA:CR43900	chr2R	12259456	12259458	3	*	lncRNA:CR43900	28761	1	0	1	7.12e-09	1.09e-06	down	-2.83412	Promoter (<=1kb)	2	12259409	12260813	1405	1	FBgn0264501	FBtr0332931	47
Rab27	chrX	1476267	1476595	329	*	Rab27	89886	3	0	3	3.28e-08	2.2e-06	down	-2.83324	Promoter (<=1kb)	6	1473884	1476974	3091	2	FBgn0025382	FBtr0070293	379
CG1578	chrX	11816407	11816409	3	*	CG1578	96877	1	0	1	8.03e-07	1.21e-05	down	-2.83206	Promoter (<=1kb)	6	11808506	11816551	8046	2	FBgn0030336	FBtr0339749	142
dpn	chr2R	8232231	8232471	241	*	dpn	25458	3	0	3	3.81e-07	8.21e-06	down	-2.83137	Promoter (<=1kb)	2	8228971	8232330	3360	2	FBgn0010109	FBtr0088803	0
asRNA:CR44987	chr2L	73420	73422	3	*	asRNA:CR44987	68	1	0	1	9.65e-08	3.89e-06	down	-2.83053	Promoter (<=1kb)	1	73485	76211	2727	1	FBgn0031213	FBtr0302164	-63
galectin	chr2L	73420	73422	3	*	galectin	68	1	0	1	9.65e-08	3.89e-06	down	-2.83053	Promoter (<=1kb)	1	73485	76211	2727	1	FBgn0031213	FBtr0302164	-63
bou	chrX	6986672	6986674	3	*	bou	93666	1	0	1	2.2e-07	6.08e-06	down	-2.82797	Promoter (<=1kb)	6	6986486	6987188	703	1	FBgn0261284	FBtr0071004	186
ogre	chrX	6986672	6986674	3	*	ogre	93666	1	0	1	2.2e-07	6.08e-06	down	-2.82797	Promoter (<=1kb)	6	6986486	6987188	703	1	FBgn0261284	FBtr0071004	186
CG17233	chr3L	20241381	20241383	3	*	CG17233	54994	1	0	1	3.36e-07	7.7e-06	down	-2.82594	Promoter (<=1kb)	3	20241267	20245312	4046	1	FBgn0036959	FBtr0074828	114
CG6951	chr3L	20241381	20241383	3	*	CG6951	54994	1	0	1	3.36e-07	7.7e-06	down	-2.82594	Promoter (<=1kb)	3	20241267	20245312	4046	1	FBgn0036959	FBtr0074828	114
Clc	chr3L	20241381	20241383	3	*	Clc	54994	1	0	1	3.36e-07	7.7e-06	down	-2.82594	Promoter (<=1kb)	3	20241267	20245312	4046	1	FBgn0036959	FBtr0074828	114
lncRNA:CR44371	chr2R	15330367	15330548	182	*	lncRNA:CR44371	31155	2	0	2	1.57e-06	1.7e-05	down	-2.82309	Promoter (<=1kb)	2	15330395	15331195	801	2	FBgn0265509	FBtr0340010	647
jar	chr3R	24264143	24264261	119	*	jar	81622	2	0	2	1.32e-06	1.55e-05	down	-2.82251	Promoter (<=1kb)	4	24252865	24263842	10978	2	FBgn0011225	FBtr0334872	-301
Kdm2	chr3R	9054206	9054208	3	*	Kdm2	69289	1	0	1	3.96e-10	6.43e-07	down	-2.82233	Promoter (<=1kb)	4	9053291	9063245	9955	1	FBgn0037659	FBtr0336760	915
CG30466	chr2R	15569105	15569291	187	*	CG30466	31353	2	0	2	4.67e-07	9.07e-06	down	-2.82231	Promoter (<=1kb)	2	15566271	15569404	3134	2	FBgn0024754	FBtr0087351	113
Flo1	chr2R	15569105	15569291	187	*	Flo1	31353	2	0	2	4.67e-07	9.07e-06	down	-2.82231	Promoter (<=1kb)	2	15566271	15569404	3134	2	FBgn0024754	FBtr0087351	113
CG12728	chrX	5942660	5942662	3	*	CG12728	92961	1	0	1	2.86e-05	9.36e-05	down	-2.82212	Promoter (<=1kb)	6	5942606	5945250	2645	1	FBgn0029825	FBtr0343052	54
Pde8	chr2R	23669642	23669644	3	*	Pde8	37829	1	0	1	3.63e-07	8.03e-06	down	-2.82021	Promoter (<=1kb)	2	23669107	23680017	10911	1	FBgn0266377	FBtr0344177	535
Toll-7	chr2R	19827206	19827208	3	*	Toll-7	34697	1	0	1	3.57e-08	2.3e-06	down	-2.81999	Promoter (<=1kb)	2	19826578	19832973	6396	1	FBgn0034476	FBtr0086336	628
sbm	chrX	14591096	14591098	3	*	sbm	98665	1	0	1	7.05e-08	3.28e-06	down	-2.81987	Promoter (<=1kb)	6	14584733	14591591	6859	2	FBgn0030574	FBtr0073944	493
CG3164	chr2L	128730	128732	3	*	CG3164	106	1	0	1	7.71e-09	1.13e-06	down	-2.81859	Promoter (<=1kb)	1	122624	129245	6622	2	FBgn0025683	FBtr0078154	513
ND-15	chr2L	128730	128732	3	*	ND-15	106	1	0	1	7.71e-09	1.13e-06	down	-2.81859	Promoter (<=1kb)	1	122624	129245	6622	2	FBgn0025683	FBtr0078154	513
lncRNA:CR46078	chr3R	28146955	28147066	112	*	lncRNA:CR46078	84528	2	0	2	6.31e-07	1.07e-05	down	-2.81844	Promoter (<=1kb)	4	28146392	28146962	571	2	FBgn0267747	FBtr0347314	0
RhoL	chr3R	9502127	9502159	33	*	RhoL	69560	2	0	2	4.74e-05	0.000132546	down	-2.81766	Promoter (<=1kb)	4	9497195	9502581	5387	2	FBgn0014380	FBtr0082124	422
CycA	chr3L	11832757	11832759	3	*	CycA	48527	1	0	1	4.8e-07	9.22e-06	down	-2.81728	Promoter (<=1kb)	3	11826719	11833578	6860	2	FBgn0000404	FBtr0304650	819
MED24	chr3L	8193717	8193952	236	*	MED24	45602	3	0	3	7.78e-05	0.000190448	down	-2.81707	Promoter (<=1kb)	3	8191522	8193116	1595	2	FBgn0035852	FBtr0076723	-601
RpL23	chr2R	22854751	22854753	3	*	RpL23	37133	1	0	1	8.42e-06	4.33e-05	down	-2.81652	Promoter (<=1kb)	2	22854383	22855694	1312	1	FBgn0010078	FBtr0071897	368
CG6654	chr3R	15213513	15213571	59	*	CG6654	74024	2	0	2	6.97e-06	3.88e-05	down	-2.81615	Promoter (<=1kb)	4	15211277	15213658	2382	2	FBgn0038301	FBtr0083139	87
RhoGAP15B	chrX	16943347	16943349	3	*	RhoGAP15B	100433	1	0	1	4.69e-07	9.09e-06	down	-2.81531	Promoter (<=1kb)	6	16943290	16956234	12945	1	FBgn0030808	FBtr0290096	57
CG6927	chrX	4908401	4908479	79	*	CG6927	92335	2	0	2	0.00120544	0.00174963	down	-2.81496	Promoter (<=1kb)	6	4909102	4914961	5860	1	FBgn0052772	FBtr0300997	-623
ND-75	chrX	8251259	8251261	3	*	ND-75	94536	1	0	1	5.15e-06	3.24e-05	down	-2.81354	Promoter (<=1kb)	6	8248651	8251451	2801	2	FBgn0017566	FBtr0071181	190
mRpS14	chrX	19479857	19479859	3	*	mRpS14	102205	1	0	1	6.36e-08	3.1e-06	down	-2.81332	Promoter (<=1kb)	6	19479382	19479917	536	2	FBgn0044030	FBtr0074785	58
lncRNA:CR44621	chrX	13396267	13396273	7	*	lncRNA:CR44621	97911	2	0	2	4.46e-05	0.000127093	down	-2.81297	Promoter (<=1kb)	6	13395830	13396361	532	1	FBgn0265832	FBtr0342664	437
CG11050	chr2L	6611168	6611170	3	*	CG11050	5075	1	0	1	1.1e-06	1.42e-05	down	-2.81154	Promoter (<=1kb)	1	6611011	6617117	6107	1	FBgn0031836	FBtr0079291	157
Rca1	chr2L	6852354	6852356	3	*	Rca1	5321	1	0	1	5.35e-05	0.000144532	down	-2.81123	Promoter (<=1kb)	1	6852315	6853866	1552	1	FBgn0017551	FBtr0079342	39
lncRNA:CR45819	chr3L	3137911	3137913	3	*	lncRNA:CR45819	41792	1	0	1	8.45e-09	1.17e-06	down	-2.81111	Promoter (<=1kb)	3	3137599	3138012	414	1	FBgn0267469	FBtr0346840	312
awd	chr3R	31745825	31745827	3	*	awd	87474	1	0	1	1.95e-07	5.69e-06	down	-2.80799	Promoter (<=1kb)	4	31745172	31745928	757	2	FBgn0000150	FBtr0346611	101
CG43795	chr2R	23444579	23444581	3	*	CG43795	37664	1	0	1	4.67e-07	9.07e-06	down	-2.80783	Promoter (<=1kb)	2	23444137	23491997	47861	1	FBgn0264339	FBtr0331989	442
CG17721	chr3R	11235789	11235791	3	*	CG17721	70948	1	0	1	1.33e-08	1.38e-06	down	-2.80694	Promoter (<=1kb)	4	11235383	11236077	695	1	FBgn0037885	FBtr0304708	406
Lerp	chr3R	26860950	26861062	113	*	Lerp	83572	2	0	2	6.74e-09	1.06e-06	down	-2.80671	Promoter (<=1kb)	4	26861349	26861407	59	2	FBgn0262379	FBtr0304221	345
Task6	chr3R	13674220	13674222	3	*	Task6	72806	1	0	1	4.63e-10	6.43e-07	down	-2.80563	Promoter (<=1kb)	4	13667046	13674542	7497	2	FBgn0038165	FBtr0334492	320
snRNA:LU	chr2L	3046524	3046775	252	*	snRNA:LU	2275	4	0	4	0.000113678	0.000254542	down	-2.80522	Promoter (<=1kb)	1	3046765	3046880	116	1	FBgn0263847	FBtr0452214	0
tey	chr3L	19663206	19663208	3	*	tey	54606	1	0	1	3.29e-05	0.000102836	down	-2.80453	Promoter (<=1kb)	3	19650506	19663664	13159	2	FBgn0036899	FBtr0273407	456
CG5937	chrX	6049943	6049945	3	*	CG5937	93062	1	0	1	8.24e-06	4.28e-05	down	-2.8036	Promoter (<=1kb)	6	6050828	6063663	12836	1	FBgn0029835	FBtr0336972	-883
l(2)k05819	chr2L	4394741	4394743	3	*	l(2)k05819	3319	1	0	1	3.03e-05	9.73e-05	down	-2.80255	Promoter (<=1kb)	1	4394196	4400487	6292	1	FBgn0022153	FBtr0331447	545
Ets65A	chr3L	6111048	6111050	3	*	Ets65A	44030	1	0	1	2.7e-06	2.25e-05	down	-2.80033	Promoter (<=1kb)	3	6111467	6122862	11396	1	FBgn0005658	FBtr0077055	-417
asRNA:CR45135	chr2R	10541893	10541895	3	*	asRNA:CR45135	27473	1	0	1	1.5e-07	4.97e-06	down	-2.79881	Promoter (<=1kb)	2	10504859	10541670	36812	2	FBgn0283521	FBtr0089345	-223
CG4133	chr2L	455587	455589	3	*	CG4133	367	1	0	1	2.22e-09	7.57e-07	down	-2.79782	Promoter (<=1kb)	1	455531	458745	3215	1	FBgn0031257	FBtr0331231	56
Arp6	chrX	15737054	15737056	3	*	Arp6	99473	1	0	1	2.13e-06	1.98e-05	down	-2.79773	Promoter (<=1kb)	6	15735774	15737120	1347	2	FBgn0011741	FBtr0074203	64
msd5	chr3L	1332934	1332936	3	*	msd5	40375	1	0	1	1.31e-07	4.62e-06	down	-2.79747	Promoter (<=1kb)	3	1332307	1333146	840	2	FBgn0035210	FBtr0072724	210
TyrR	chr3R	17761838	17761840	3	*	TyrR	76208	1	0	1	1.36e-08	1.39e-06	down	-2.79735	Promoter (<=1kb)	4	17750129	17762481	12353	2	FBgn0038542	FBtr0083532	641
eIF2alpha	chrX	16446746	16446838	93	*	eIF2alpha	100045	2	0	2	2.4e-05	8.34e-05	down	-2.79672	Promoter (<=1kb)	6	16445176	16446993	1818	2	FBgn0261609	FBtr0343016	155
lncRNA:CR46098	chr3R	25137596	25137787	192	*	lncRNA:CR46098	82416	2	0	2	1.96e-09	7.57e-07	down	-2.79595	Promoter (<=1kb)	4	25137701	25138001	301	1	FBgn0267767	FBtr0347331	0
EMC8-9	chr2R	22882166	22882286	121	*	EMC8-9	37159	2	0	2	2.22e-06	2.03e-05	down	-2.79576	Promoter (<=1kb)	2	22881322	22882690	1369	2	FBgn0034791	FBtr0071907	404
lncRNA:CR43882	chr3L	4746027	4746029	3	*	lncRNA:CR43882	43116	1	0	1	2.25e-08	1.8e-06	down	-2.79547	Promoter (<=1kb)	3	4745911	4746632	722	2	FBgn0264474	FBtr0332743	603
RhoGEF64C	chr3L	4746027	4746029	3	*	RhoGEF64C	43116	1	0	1	2.25e-08	1.8e-06	down	-2.79547	Promoter (<=1kb)	3	4745911	4746632	722	2	FBgn0264474	FBtr0332743	603
Gr2a	chrX	1452813	1452815	3	*	Gr2a	89864	1	0	1	6.5e-05	0.000166504	down	-2.79534	Promoter (<=1kb)	6	1452430	1454177	1748	1	FBgn0265139	FBtr0300224	383
Pglym78	chr3R	29148435	29148648	214	*	Pglym78	85214	3	0	3	2.35e-08	1.86e-06	down	-2.79286	Promoter (<=1kb)	4	29148362	29149901	1540	1	FBgn0014869	FBtr0100482	73
CG2924	chrX	2269939	2269941	3	*	CG2924	90608	1	0	1	1.32e-09	6.69e-07	down	-2.79259	Promoter (<=1kb)	6	2269996	2270507	512	1	FBgn0267036	FBtr0346010	-55
CG4928	chrX	16913423	16913425	3	*	CG4928	100410	1	0	1	1.73e-05	6.79e-05	down	-2.79128	Promoter (<=1kb)	6	16913180	16937411	24232	1	FBgn0027556	FBtr0074344	243
Ipk2	chr2L	574121	574123	3	*	Ipk2	450	1	0	1	4.05e-05	0.000118666	down	-2.79082	Promoter (<=1kb)	1	573033	574264	1232	2	FBgn0031267	FBtr0078074	141
CG31717	chr2L	10251433	10251435	3	*	CG31717	8042	1	0	1	3.42e-06	2.56e-05	down	-2.79065	Promoter (<=1kb)	1	10251843	10254686	2844	1	FBgn0010407	FBtr0079978	-408
Hrb98DE	chr3R	28600848	28600942	95	*	Hrb98DE	84802	2	0	2	6.07e-07	1.04e-05	down	-2.78818	Promoter (<=1kb)	4	28600407	28605777	5371	1	FBgn0001215	FBtr0085303	441
CG2211	chr3L	1333242	1333244	3	*	CG2211	40376	1	0	1	8.3e-08	3.6e-06	down	-2.7878	Promoter (<=1kb)	3	1332307	1333146	840	2	FBgn0035210	FBtr0072724	-96
Axud1	chr2L	2365680	2365829	150	*	Axud1	1768	2	0	2	6.61e-08	3.17e-06	down	-2.78778	Promoter (<=1kb)	1	2365594	2370137	4544	1	FBgn0261647	FBtr0330666	86
tmod	chr3R	30560839	30560841	3	*	tmod	86431	1	0	1	2.46e-08	1.91e-06	down	-2.78608	Promoter (<=1kb)	4	30554554	30560199	5646	2	FBgn0083991	FBtr0111047	-640
HLH4C	chrX	4647338	4647340	3	*	HLH4C	92185	1	0	1	5.87e-06	3.51e-05	down	-2.78474	Promoter (<=1kb)	6	4645127	4647414	2288	2	FBgn0011277	FBtr0070691	74
spen	chr2L	159411	159413	3	*	spen	134	1	0	1	4.64e-08	2.63e-06	down	-2.78432	Promoter (<=1kb)	1	159032	203397	44366	1	FBgn0016977	FBtr0078121	379
Naa20A	chrX	19622992	19622994	3	*	Naa20A	102331	1	0	1	1.98e-08	1.68e-06	down	-2.78332	Promoter (<=1kb)	6	19621451	19623074	1624	2	FBgn0031043	FBtr0074763	80
Pngl	chr2R	6017866	6017868	3	*	Pngl	23504	1	0	1	2.85e-07	7.07e-06	down	-2.78178	Promoter (<=1kb)	2	6017739	6020695	2957	1	FBgn0033050	FBtr0335285	127
Ant2	chrX	10780936	10781163	228	*	Ant2	96148	3	0	3	3.95e-07	8.35e-06	down	-2.78111	Promoter (<=1kb)	6	10778954	10780661	1708	2	FBgn0025111	FBtr0333963	-275
sesB	chrX	10780936	10781163	228	*	sesB	96148	3	0	3	3.95e-07	8.35e-06	down	-2.78111	Promoter (<=1kb)	6	10778954	10780661	1708	2	FBgn0025111	FBtr0333963	-275
asRNA:CR46145	chr3R	9394460	9394462	3	*	asRNA:CR46145	69480	1	0	1	2.86e-09	7.91e-07	down	-2.78096	Promoter (<=1kb)	4	9367603	9394546	26944	2	FBgn0000723	FBtr0082051	84
FER	chr3R	9394460	9394462	3	*	FER	69480	1	0	1	2.86e-09	7.91e-07	down	-2.78096	Promoter (<=1kb)	4	9367603	9394546	26944	2	FBgn0000723	FBtr0082051	84
CG32625	chrX	13756381	13756383	3	*	CG32625	98143	1	0	1	3.93e-09	8.32e-07	down	-2.78008	Promoter (<=1kb)	6	13756164	13756826	663	2	FBgn0052625	FBtr0073839	443
CG7029	chr3R	22750933	22750935	3	*	CG7029	80313	1	0	1	9.28e-08	3.84e-06	down	-2.77814	Promoter (<=1kb)	4	22750901	22794030	43130	1	FBgn0039026	FBtr0344297	32
Usp12-46	chr3R	22750933	22750935	3	*	Usp12-46	80313	1	0	1	9.28e-08	3.84e-06	down	-2.77814	Promoter (<=1kb)	4	22750901	22794030	43130	1	FBgn0039026	FBtr0344297	32
CG8108	chr3L	9864816	9864818	3	*	CG8108	47099	1	0	1	7.74e-07	1.19e-05	down	-2.77677	Promoter (<=1kb)	3	9864639	9870674	6036	1	FBgn0027567	FBtr0076340	177
CG12773	chrX	1349795	1349797	3	*	CG12773	89775	1	0	1	4.81e-09	9.03e-07	down	-2.77599	Promoter (<=1kb)	6	1344872	1349357	4486	2	FBgn0024360	FBtr0332288	-438
mtd	chr3R	5349513	5349627	115	*	mtd	66361	2	0	2	1.6e-07	5.13e-06	down	-2.77543	Promoter (<=1kb)	4	5272947	5350010	77064	2	FBgn0013576	FBtr0273432	383
rept	chr3L	19255457	19255459	3	*	rept	54229	1	0	1	4.13e-05	0.000120382	down	-2.77428	Promoter (<=1kb)	3	19255340	19257111	1772	1	FBgn0040075	FBtr0344993	117
pirk	chr2R	21662941	21663105	165	*	pirk	36186	2	0	2	0.000875057	0.00133431	down	-2.77427	Promoter (<=1kb)	2	21660967	21662995	2029	2	FBgn0034647	FBtr0345682	0
eca	chr3R	9685159	9685161	3	*	eca	69730	1	0	1	8.8e-07	1.27e-05	down	-2.77317	Promoter (<=1kb)	4	9684469	9685476	1008	2	FBgn0069242	FBtr0082098	315
Phm	chr2R	23988244	23988246	3	*	Phm	38154	1	0	1	2.48e-08	1.91e-06	down	-2.77231	Promoter (<=1kb)	2	23985175	23988455	3281	2	FBgn0283509	FBtr0072203	209
CG1316	chr3L	4283847	4283980	134	*	CG1316	42770	2	0	2	1.22e-05	5.44e-05	down	-2.77183	Promoter (<=1kb)	3	4283851	4286865	3015	1	FBgn0035526	FBtr0073233	0
CG3939	chrX	3175267	3175564	298	*	CG3939	91252	4	0	4	4.66e-08	2.64e-06	down	-2.77148	Promoter (<=1kb)	6	3175202	3176223	1022	1	FBgn0040396	FBtr0343600	65
CG11523	chr3L	22266610	22266612	3	*	CG11523	56765	1	0	1	3.98e-05	0.000117041	down	-2.77054	Promoter (<=1kb)	3	22265806	22266679	874	2	FBgn0037156	FBtr0078511	67
CG13594	chr2R	24629224	24629226	3	*	CG13594	38709	1	0	1	1.35e-07	4.68e-06	down	-2.76948	Promoter (<=1kb)	2	24628627	24628744	118	2	FBgn0086030	FBtr0114306	-480
E(spl)mgamma-HLH	chr3R	26000061	26000063	3	*	E(spl)mgamma-HLH	83024	1	0	1	3.76e-06	2.7e-05	down	-2.76929	Promoter (<=1kb)	4	25999851	26000761	911	1	FBgn0002735	FBtr0084955	210
vlc	chr2R	5702620	5702622	3	*	vlc	23217	1	0	1	6e-07	1.04e-05	down	-2.76827	Promoter (<=1kb)	2	5702675	5705439	2765	1	FBgn0259978	FBtr0300503	-53
CG1673	chrX	13396865	13396934	70	*	CG1673	97912	2	0	2	2.03e-05	7.5e-05	down	-2.76709	Promoter (<=1kb)	6	13396899	13401224	4326	1	FBgn0030482	FBtr0073777	0
eIF3b	chr2R	17536455	17536698	244	*	eIF3b	32984	3	0	3	1.72e-05	6.76e-05	down	-2.76625	Promoter (<=1kb)	2	17536333	17539142	2810	1	FBgn0034237	FBtr0086942	122
CG14440	chrX	6698006	6698326	321	*	CG14440	93478	3	0	3	5.71e-06	3.45e-05	down	-2.76569	Promoter (<=1kb)	6	6695866	6698503	2638	2	FBgn0029894	FBtr0070987	177
Eip63F-1	chr3L	3933607	3933663	57	*	Eip63F-1	42419	2	0	2	0.000731255	0.00114737	down	-2.76547	Promoter (<=1kb)	3	3911690	3933637	21948	2	FBgn0004910	FBtr0073174	0
CG5380	chr3R	22367000	22367008	9	*	CG5380	79926	2	0	2	1.35e-08	1.38e-06	down	-2.76502	Promoter (<=1kb)	4	22366080	22367159	1080	2	FBgn0038951	FBtr0084236	151
ttm2	chr3L	276149	276396	248	*	ttm2	39456	3	0	3	1.97e-08	1.68e-06	down	-2.76481	Promoter (<=1kb)	3	275155	276667	1513	1	FBgn0035124	FBtr0072507	994
Chrac-14	chr2L	8437524	8437918	395	*	Chrac-14	6701	4	0	4	1.02e-05	4.86e-05	down	-2.76101	Promoter (<=1kb)	1	8437405	8437996	592	1	FBgn0043002	FBtr0100268	119
lncRNA:CR45348	chr2L	897717	897719	3	*	lncRNA:CR45348	758	1	0	1	6.38e-09	1.04e-06	down	-2.76002	Promoter (<=1kb)	1	897453	898050	598	2	FBgn0266887	FBtr0345739	331
CG17230	chr3R	11445404	11445563	160	*	CG17230	71117	2	0	2	2.75e-07	6.93e-06	down	-2.75777	Promoter (<=1kb)	4	11437547	11445994	8448	2	FBgn0051374	FBtr0082400	431
sals	chr3R	11445404	11445563	160	*	sals	71117	2	0	2	2.75e-07	6.93e-06	down	-2.75777	Promoter (<=1kb)	4	11437547	11445994	8448	2	FBgn0051374	FBtr0082400	431
CG12769	chr2R	8058595	8058597	3	*	CG12769	25276	1	0	1	1.43e-07	4.83e-06	down	-2.75698	Promoter (<=1kb)	2	8053829	8058551	4723	2	FBgn0033252	FBtr0088828	-44
Atg3	chr3L	18748919	18749090	172	*	Atg3	53900	2	0	2	1.23e-08	1.34e-06	down	-2.75684	Promoter (<=1kb)	3	18748687	18750483	1797	1	FBgn0036813	FBtr0075055	232
lncRNA:CR43435	chr3R	6778289	6778343	55	*	lncRNA:CR43435	67534	2	0	2	2.51e-08	1.92e-06	down	-2.75527	Promoter (<=1kb)	4	6778117	6778952	836	2	FBgn0263383	FBtr0309070	609
CG32533	chrX	19479190	19479201	12	*	CG32533	102203	2	0	2	2.02e-05	7.48e-05	down	-2.75465	Promoter (<=1kb)	6	19474156	19479319	5164	2	FBgn0052533	FBtr0346016	118
ACC	chr2R	7991791	7991793	3	*	ACC	25208	1	0	1	1.02e-06	1.36e-05	down	-2.75362	Promoter (<=1kb)	2	7974115	7991862	17748	2	FBgn0033246	FBtr0339125	69
sif	chr3L	5657924	5657926	3	*	sif	43662	1	0	1	1.88e-09	7.57e-07	down	-2.75295	Promoter (<=1kb)	3	5657913	5749599	91687	1	FBgn0085447	FBtr0340654	11
rswl	chr2R	18451665	18451667	3	*	rswl	33696	1	0	1	4.09e-08	2.46e-06	down	-2.75264	Promoter (<=1kb)	2	18451284	18452736	1453	1	FBgn0034351	FBtr0086696	381
Spt5	chr2R	19438022	19438024	3	*	Spt5	34463	1	0	1	3.66e-06	2.66e-05	down	-2.75194	Promoter (<=1kb)	2	19437483	19441898	4416	1	FBgn0040273	FBtr0086531	539
Rpt3	chrX	11125188	11125190	3	*	Rpt3	96438	1	0	1	4.81e-05	0.000134063	down	-2.75137	Promoter (<=1kb)	6	11125231	11126785	1555	1	FBgn0028686	FBtr0073436	-41
viaf	chr3L	11992780	11992792	13	*	viaf	48655	2	0	2	1.12e-05	5.17e-05	down	-2.75068	Promoter (<=1kb)	3	11991853	11993179	1327	2	FBgn0036237	FBtr0076062	387
Charon	chr2L	1172719	1172721	3	*	Charon	984	1	0	1	1.66e-07	5.2e-06	down	-2.75043	Promoter (<=1kb)	1	1170753	1172805	2053	2	FBgn0031317	FBtr0077979	84
mld	chr3R	24589578	24589580	3	*	mld	81914	1	0	1	1.96e-07	5.7e-06	down	-2.74897	Promoter (<=1kb)	4	24589162	24623899	34738	1	FBgn0263490	FBtr0304914	416
CG7497	chr3L	17633308	17633494	187	*	CG7497	53090	2	0	2	7.68e-06	4.11e-05	down	-2.74839	Promoter (<=1kb)	3	17633040	17633317	278	2	FBgn0265760	FBtr0340722	0
lncRNA:CR44567	chr3L	17633308	17633494	187	*	lncRNA:CR44567	53090	2	0	2	7.68e-06	4.11e-05	down	-2.74839	Promoter (<=1kb)	3	17633040	17633317	278	2	FBgn0265760	FBtr0340722	0
dos	chr3L	2590338	2590340	3	*	dos	41465	1	0	1	5.71e-09	9.81e-07	down	-2.74794	Promoter (<=1kb)	3	2589414	2595590	6177	1	FBgn0016794	FBtr0072927	924
CG32756	chrX	5945738	5945740	3	*	CG32756	92963	1	0	1	6.65e-06	3.78e-05	down	-2.74628	Promoter (<=1kb)	6	5945682	5948353	2672	1	FBgn0052756	FBtr0343295	56
Pka-R1	chr3L	20816236	20816238	3	*	Pka-R1	55575	1	0	1	2.89e-08	2.06e-06	down	-2.74598	Promoter (<=1kb)	3	20816118	20836048	19931	1	FBgn0259243	FBtr0302643	118
CG32373	chr3L	7653986	7653988	3	*	CG32373	45236	1	0	1	1.93e-07	5.65e-06	down	-2.74588	Promoter (<=1kb)	3	7651866	7654752	2887	2	FBgn0035807	FBtr0076821	764
CG7492	chr3L	7653986	7653988	3	*	CG7492	45236	1	0	1	1.93e-07	5.65e-06	down	-2.74588	Promoter (<=1kb)	3	7651866	7654752	2887	2	FBgn0035807	FBtr0076821	764
pod1	chrX	6803623	6803740	118	*	pod1	93549	2	0	2	2.58e-07	6.69e-06	down	-2.74508	Promoter (<=1kb)	6	6803684	6813520	9837	1	FBgn0029903	FBtr0112956	0
CG6785	chr2L	12045159	12045161	3	*	CG6785	9469	1	0	1	3.48e-06	2.59e-05	down	-2.74393	Promoter (<=1kb)	1	12041054	12045200	4147	2	FBgn0032399	FBtr0080307	39
Rab14	chr2L	14355464	14355466	3	*	Rab14	11078	1	0	1	2.24e-08	1.8e-06	down	-2.74369	Promoter (<=1kb)	1	14355145	14358345	3201	1	FBgn0015791	FBtr0080626	319
KLHL18	chr3R	12010341	12010387	47	*	KLHL18	71574	2	0	2	6.48e-08	3.13e-06	down	-2.74305	Promoter (<=1kb)	4	12007476	12010434	2959	2	FBgn0037978	FBtr0335434	47
RhoGEF3	chr3L	278222	278378	157	*	RhoGEF3	39458	2	0	2	1.47e-08	1.44e-06	down	-2.74255	Promoter (<=1kb)	3	277437	305292	27856	1	FBgn0264707	FBtr0333962	785
CG2247	chrX	11611214	11611232	19	*	CG2247	96740	2	0	2	1.07e-06	1.4e-05	down	-2.74183	Promoter (<=1kb)	6	11606290	11611652	5363	2	FBgn0030320	FBtr0073536	420
fz3	chrX	770244	770246	3	*	fz3	89379	1	0	1	0.000167133	0.000343367	down	-2.74066	Promoter (<=1kb)	6	770026	783302	13277	1	FBgn0027343	FBtr0070138	218
kn	chr2R	14797748	14797834	87	*	kn	30753	2	0	2	9.26e-06	4.59e-05	down	-2.73784	Promoter (<=1kb)	2	14772650	14797027	24378	2	FBgn0001319	FBtr0329882	-721
qkr58E-1	chr2R	22415062	22415105	44	*	qkr58E-1	36761	2	0	2	1.36e-06	1.58e-05	down	-2.73608	Promoter (<=1kb)	2	22412556	22415518	2963	2	FBgn0022986	FBtr0346637	413
nAChRalpha6	chr2L	9885882	9885884	3	*	nAChRalpha6	7755	1	0	1	7.97e-09	1.14e-06	down	-2.73531	Promoter (<=1kb)	1	9793317	9886250	92934	2	FBgn0032151	FBtr0079914	366
Ndae1	chr2L	7223883	7224007	125	*	Ndae1	5619	2	0	2	5.42e-06	3.35e-05	down	-2.73344	Promoter (<=1kb)	1	7220369	7223081	2713	2	FBgn0263133	FBtr0079413	-802
Diap1	chr3L	16041093	16041095	3	*	Diap1	51727	1	0	1	7.15e-09	1.09e-06	down	-2.73276	Promoter (<=1kb)	3	16038410	16040535	2126	2	FBgn0260635	FBtr0333617	-558
CG45002	chrX	17018293	17018295	3	*	CG45002	100492	1	0	1	1.44e-06	1.63e-05	down	-2.73158	Promoter (<=1kb)	6	16969069	17018399	49331	2	FBgn0266354	FBtr0344099	104
Socs16D	chrX	17826750	17826752	3	*	Socs16D	101094	1	0	1	1.32e-07	4.64e-06	down	-2.73074	Promoter (<=1kb)	6	17820775	17827520	6746	2	FBgn0030869	FBtr0074473	768
lobo	chr3R	25193431	25193485	55	*	lobo	82465	2	1	1	1.96e-05	7.34e-05	down	-2.72896	Promoter (<=1kb)	4	25169565	25193776	24212	2	FBgn0083946	FBtr0110797	291
CG7564	chr3L	17514502	17514648	147	*	CG7564	52998	2	0	2	9.58e-06	4.68e-05	down	-2.72862	Promoter (<=1kb)	3	17514298	17524740	10443	1	FBgn0036734	FBtr0345387	204
SdhC	chr3R	11209303	11209719	417	*	SdhC	70914	4	0	4	3.73e-07	8.12e-06	down	-2.72706	Promoter (<=1kb)	4	11208887	11209849	963	2	FBgn0037873	FBtr0335221	130
smt3	chr2L	6967215	6967217	3	*	smt3	5421	1	0	1	2.09e-09	7.57e-07	down	-2.72637	Promoter (<=1kb)	1	6966780	6967590	811	2	FBgn0264922	FBtr0346716	373
Mondo	chr2L	21309461	21309490	30	*	Mondo	16041	2	0	2	9.29e-07	1.3e-05	down	-2.72598	Promoter (<=1kb)	1	21286078	21309489	23412	2	FBgn0032940	FBtr0301461	0
mRpS10	chr3R	15229749	15229751	3	*	mRpS10	74041	1	0	1	3.05e-09	7.91e-07	down	-2.72537	Promoter (<=1kb)	4	15229702	15230516	815	1	FBgn0038307	FBtr0083054	47
l(3)02640	chr3L	1334953	1334955	3	*	l(3)02640	40378	1	0	1	1.73e-07	5.33e-06	down	-2.72475	Promoter (<=1kb)	3	1334889	1339415	4527	1	FBgn0010786	FBtr0072679	64
Unc-115a	chr3R	9705293	9705295	3	*	Unc-115a	69741	1	0	1	2.66e-09	7.91e-07	down	-2.723	Promoter (<=1kb)	4	9694386	9705417	11032	2	FBgn0051352	FBtr0339597	122
CG3862	chr2L	825706	825708	3	*	CG3862	702	1	0	1	1.25e-05	5.52e-05	down	-2.72168	Promoter (<=1kb)	1	824329	825861	1533	2	FBgn0031286	FBtr0078038	153
snRNA:U1:95Cc	chr3R	23826363	23826365	3	*	snRNA:U1:95Cc	81266	1	0	1	4.69e-05	0.000131625	down	-2.72114	Promoter (<=1kb)	4	23826334	23826497	164	1	FBgn0004187	FBtr0084487	29
tej	chr2R	14302074	14302076	3	*	tej	30425	1	0	1	3.82e-08	2.39e-06	down	-2.7196	Promoter (<=1kb)	2	14300103	14302353	2251	2	FBgn0033921	FBtr0087562	277
snoRNA:U3:54Aa	chr2R	17143558	17143713	156	*	snoRNA:U3:54Aa	32688	2	0	2	3e-05	9.67e-05	down	-2.71909	Promoter (<=1kb)	2	17143521	17143693	173	2	FBgn0065048	FBtr0091925	0
GstE12	chr2R	24767784	24767786	3	*	GstE12	38824	1	0	1	2.06e-06	1.95e-05	down	-2.71844	Promoter (<=1kb)	2	24766744	24767707	964	2	FBgn0027590	FBtr0343496	-77
lncRNA:CR43314	chr2L	11970889	11970891	3	*	lncRNA:CR43314	9379	1	0	1	6.17e-06	3.62e-05	down	-2.71828	Promoter (<=1kb)	1	11952200	11971094	18895	2	FBgn0263019	FBtr0306899	203
RpL21	chr2L	22247599	22247746	148	*	RpL21	16860	2	0	2	7.56e-06	4.07e-05	down	-2.71806	Promoter (<=1kb)	1	22247111	22247833	723	2	FBgn0032987	FBtr0331295	87
emp	chr2R	24983695	24983697	3	*	emp	39019	1	0	1	0.000141183	0.000301029	down	-2.718	Promoter (<=1kb)	2	24976605	24983204	6600	2	FBgn0010435	FBtr0072402	-491
Slbp	chr3R	29153125	29153127	3	*	Slbp	85218	1	0	1	7.02e-08	3.27e-06	down	-2.71755	Promoter (<=1kb)	4	29152074	29153266	1193	2	FBgn0041186	FBtr0085409	139
Cht2	chr3L	1755590	1755747	158	*	Cht2	40758	2	0	2	2.24e-05	7.97e-05	down	-2.71574	Promoter (<=1kb)	3	1752543	1755668	3126	2	FBgn0022702	FBtr0072795	0
flw	chrX	10386074	10386144	71	*	flw	95913	2	0	2	1.51e-07	4.98e-06	down	-2.71493	Promoter (<=1kb)	6	10385960	10409817	23858	1	FBgn0000711	FBtr0333305	114
asRNA:CR31144	chr3R	11222563	11222565	3	*	asRNA:CR31144	70930	1	0	1	9.52e-08	3.88e-06	down	-2.71376	Promoter (<=1kb)	4	11222405	11222489	85	1	FBgn0086055	FBtr0114331	158
RpL3	chr3R	11222563	11222565	3	*	RpL3	70930	1	0	1	9.52e-08	3.88e-06	down	-2.71376	Promoter (<=1kb)	4	11222405	11222489	85	1	FBgn0086055	FBtr0114331	158
lid	chr2L	5998019	5998021	3	*	lid	4654	1	0	1	5.88e-08	2.99e-06	down	-2.71281	Promoter (<=1kb)	1	5990441	5997764	7324	2	FBgn0031759	FBtr0307070	-255
CARPA	chrX	7826889	7826891	3	*	CARPA	94209	1	0	1	2.67e-07	6.84e-06	down	-2.7127	Promoter (<=1kb)	6	7826197	7842679	16483	1	FBgn0029962	FBtr0343348	692
asRNA:CR45528	chrX	5755945	5755947	3	*	asRNA:CR45528	92830	1	0	1	0.000129679	0.000281811	down	-2.71268	Promoter (<=1kb)	6	5755748	5759751	4004	1	FBgn0029801	FBtr0070809	197
CG15771	chrX	5755945	5755947	3	*	CG15771	92830	1	0	1	0.000129679	0.000281811	down	-2.71268	Promoter (<=1kb)	6	5755748	5759751	4004	1	FBgn0029801	FBtr0070809	197
CG9005	chr2R	11631691	11631693	3	*	CG9005	28205	1	0	1	3.31e-09	8.06e-07	down	-2.71187	Promoter (<=1kb)	2	11619479	11632515	13037	2	FBgn0033638	FBtr0300945	822
SK	chrX	5340500	5340502	3	*	SK	92564	1	0	1	1.56e-08	1.5e-06	down	-2.7085	Promoter (<=1kb)	6	5340236	5405138	64903	1	FBgn0029761	FBtr0331604	264
Drgx	chr2L	3663397	3663399	3	*	Drgx	2786	1	0	1	8.39e-08	3.62e-06	down	-2.70767	Promoter (<=1kb)	1	3662745	3692114	29370	1	FBgn0085369	FBtr0339572	652
CG41128	chr3R	3750507	3750509	3	*	CG41128	64966	1	0	1	2.02e-06	1.93e-05	down	-2.70655	Promoter (<=1kb)	4	3750363	3752353	1991	1	FBgn0069923	FBtr0301812	144
MESR3	chr2L	18618191	18618296	106	*	MESR3	14032	2	0	2	1.75e-06	1.8e-05	down	-2.70562	Promoter (<=1kb)	1	18617256	18661776	44521	1	FBgn0032694	FBtr0343808	935
syd	chr3L	7935779	7935781	3	*	syd	45419	1	0	1	3.73e-07	8.12e-06	down	-2.70535	Promoter (<=1kb)	3	7916650	7936120	19471	2	FBgn0024187	FBtr0345912	339
Arf51F	chr2R	15322921	15322923	3	*	Arf51F	31150	1	0	1	6.5e-07	1.09e-05	down	-2.70449	Promoter (<=1kb)	2	15322803	15324892	2090	1	FBgn0013750	FBtr0087379	118
hoip	chr2L	9700057	9700059	3	*	hoip	7617	1	0	1	7.44e-08	3.38e-06	down	-2.7024	Promoter (<=1kb)	1	9699829	9700459	631	1	FBgn0286786	FBtr0079846	228
c11.1	chrX	9282895	9283037	143	*	c11.1	95264	2	0	2	3.89e-05	0.00011528	down	-2.70208	Promoter (<=1kb)	6	9275318	9283117	7800	2	FBgn0040236	FBtr0343368	80
Syt7	chr4	305576	305578	3	*	Syt7	87956	1	0	1	1.99e-09	7.57e-07	down	-2.70169	Promoter (<=1kb)	5	278685	305818	27134	2	FBgn0039900	FBtr0089137	240
tank	chr2L	4837873	4837875	3	*	tank	3743	1	0	1	1.17e-06	1.47e-05	down	-2.70141	Promoter (<=1kb)	1	4835335	4837999	2665	2	FBgn0031635	FBtr0077412	124
Ptx1	chr3R	30920954	30920956	3	*	Ptx1	86744	1	0	1	1.19e-05	5.35e-05	down	-2.7008	Promoter (<=1kb)	4	30921682	30922383	702	1	FBgn0264833	FBtr0334697	-726
Pde11	chr2L	18572776	18572778	3	*	Pde11	13992	1	0	1	7e-05	0.000175951	down	-2.69971	Promoter (<=1kb)	1	18532728	18572286	39559	2	FBgn0085370	FBtr0112545	-490
PyK	chr3R	22367543	22367682	140	*	PyK	79927	2	0	2	9.66e-09	1.22e-06	down	-2.69935	Promoter (<=1kb)	4	22367536	22372746	5211	1	FBgn0267385	FBtr0084213	7
CR33222	chrX	7901151	7901153	3	*	CR33222	94279	1	0	1	1.81e-06	1.83e-05	down	-2.69853	Promoter (<=1kb)	6	7901062	7901203	142	2	FBgn0082924	FBtr0113562	50
RpS6	chrX	7901151	7901153	3	*	RpS6	94279	1	0	1	1.81e-06	1.83e-05	down	-2.69853	Promoter (<=1kb)	6	7901062	7901203	142	2	FBgn0082924	FBtr0113562	50
snoRNA:Or-aca2	chrX	7901151	7901153	3	*	snoRNA:Or-aca2	94279	1	0	1	1.81e-06	1.83e-05	down	-2.69853	Promoter (<=1kb)	6	7901062	7901203	142	2	FBgn0082924	FBtr0113562	50
CG32448	chr3L	21828127	21828129	3	*	CG32448	56486	1	0	1	1.44e-05	6.04e-05	down	-2.69814	Promoter (<=1kb)	3	21827774	21828195	422	2	FBgn0052448	FBtr0290247	66
CG12129	chr2R	10033395	10033397	3	*	CG12129	27016	1	0	1	2.96e-06	2.36e-05	down	-2.6965	Promoter (<=1kb)	2	10033304	10034698	1395	1	FBgn0033475	FBtr0088395	91
asRNA:CR45525	chrX	5690446	5690448	3	*	asRNA:CR45525	92775	1	0	1	3.94e-06	2.78e-05	down	-2.69597	Promoter (<=1kb)	6	5690436	5692773	2338	1	FBgn0000394	FBtr0340464	10
cv	chrX	5690446	5690448	3	*	cv	92775	1	0	1	3.94e-06	2.78e-05	down	-2.69597	Promoter (<=1kb)	6	5690436	5692773	2338	1	FBgn0000394	FBtr0340464	10
Csp	chr3L	22267703	22267705	3	*	Csp	56767	1	0	1	2.35e-07	6.31e-06	down	-2.6956	Promoter (<=1kb)	3	22267568	22273745	6178	1	FBgn0004179	FBtr0334747	135
Eaat1	chr2L	9338146	9338148	3	*	Eaat1	7340	1	0	1	1.26e-05	5.55e-05	down	-2.69433	Promoter (<=1kb)	1	9337806	9341925	4120	1	FBgn0026439	FBtr0079802	340
CG8223	chr3R	8747863	8747989	127	*	CG8223	69033	2	0	2	2.49e-06	2.16e-05	down	-2.694	Promoter (<=1kb)	4	8747798	8754104	6307	1	FBgn0037624	FBtr0308889	65
CG11790	chr3R	25048614	25048616	3	*	CG11790	82324	1	0	1	1.2e-05	5.38e-05	down	-2.69382	Promoter (<=1kb)	4	25047706	25049455	1750	1	FBgn0039265	FBtr0334503	908
TfAP-2	chr3L	21598994	21599021	28	*	TfAP-2	56221	2	0	2	8.25e-05	0.000199354	down	-2.69237	Promoter (<=1kb)	3	21598856	21613349	14494	1	FBgn0261953	FBtr0333466	138
RpL38	chr2R	4516423	4516425	3	*	RpL38	21878	1	0	1	4.76e-08	2.65e-06	down	-2.69213	Promoter (<=1kb)	2	4515388	4516458	1071	2	FBgn0040007	FBtr0334985	33
vri	chr2L	5305795	5305797	3	*	vri	4151	1	0	1	1.5e-07	4.97e-06	down	-2.69162	Promoter (<=1kb)	1	5305650	5311223	5574	1	FBgn0016076	FBtr0346579	145
CG1688	chr2R	9806400	9806402	3	*	CG1688	26809	1	0	1	1.25e-07	4.48e-06	down	-2.69132	Promoter (<=1kb)	2	9766364	9806875	40512	2	FBgn0027589	FBtr0088495	473
Gp93	chr3R	27948859	27949043	185	*	Gp93	84418	2	0	2	2.13e-07	5.99e-06	down	-2.69108	Promoter (<=1kb)	4	27948711	27952151	3441	1	FBgn0039562	FBtr0085254	148
Tusp	chr3R	27614251	27614253	3	*	Tusp	84203	1	0	1	3.73e-09	8.25e-07	down	-2.69075	Promoter (<=1kb)	4	27613285	27634932	21648	1	FBgn0039530	FBtr0302589	966
cno	chr3R	5195073	5195273	201	*	cno	66250	2	0	2	4.65e-06	3.06e-05	down	-2.69062	Promoter (<=1kb)	4	5195004	5195163	160	2	FBgn0263018	FBtr0306791	0
snRNA:U4atac	chr3R	5195073	5195273	201	*	snRNA:U4atac	66250	2	0	2	4.65e-06	3.06e-05	down	-2.69062	Promoter (<=1kb)	4	5195004	5195163	160	2	FBgn0263018	FBtr0306791	0
Bx	chrX	18515904	18515906	3	*	Bx	101612	1	0	1	3.52e-08	2.28e-06	down	-2.69044	Promoter (<=1kb)	6	18515428	18571726	56299	1	FBgn0265598	FBtr0340363	476
HisRS	chrX	18515904	18515906	3	*	HisRS	101612	1	0	1	3.52e-08	2.28e-06	down	-2.69044	Promoter (<=1kb)	6	18515428	18571726	56299	1	FBgn0265598	FBtr0340363	476
AGO1	chr2R	13957447	13957449	3	*	AGO1	30173	1	0	1	5.64e-09	9.79e-07	down	-2.69037	Promoter (<=1kb)	2	13943387	13958089	14703	2	FBgn0262739	FBtr0305592	640
PH4alphaEFB	chr3R	30466343	30466345	3	*	PH4alphaEFB	86334	1	0	1	1.86e-08	1.65e-06	down	-2.69016	Promoter (<=1kb)	4	30466050	30485799	19750	1	FBgn0039776	FBtr0085650	293
nwk	chr3L	9145238	9145290	53	*	nwk	46544	2	0	2	4.78e-06	3.11e-05	down	-2.68876	Promoter (<=1kb)	3	9144593	9144697	105	1	FBgn0263556	FBtr0309687	645
l(2)34Fd	chr2L	14354966	14354968	3	*	l(2)34Fd	11077	1	0	1	3.33e-05	0.000103644	down	-2.68837	Promoter (<=1kb)	1	14352594	14355085	2492	2	FBgn0261535	FBtr0080639	117
chrb	chr3L	11494304	11494306	3	*	chrb	48250	1	0	1	1.35e-06	1.57e-05	down	-2.68827	Promoter (<=1kb)	3	11493871	11499055	5185	1	FBgn0036165	FBtr0344910	433
lncRNA:CR44608	chr2L	4229235	4229237	3	*	lncRNA:CR44608	3172	1	0	1	1.66e-08	1.54e-06	down	-2.68763	Promoter (<=1kb)	1	4228921	4229458	538	1	FBgn0265819	FBtr0342651	314
Trl	chr3L	14757981	14757983	3	*	Trl	50749	1	0	1	5.85e-07	1.02e-05	down	-2.68752	Promoter (<=1kb)	3	14747929	14757962	10034	2	FBgn0260233	FBtr0300642	-19
CG45050	chr3R	9342322	9342324	3	*	CG45050	69438	1	0	1	9.13e-08	3.81e-06	down	-2.68723	Promoter (<=1kb)	4	9341867	9362994	21128	1	FBgn0266410	FBtr0344367	455
maf-S	chr2R	20641248	20641250	3	*	maf-S	35378	1	0	1	7.29e-05	0.000181362	down	-2.68498	Promoter (<=1kb)	2	20640976	20641668	693	1	FBgn0034534	FBtr0342716	272
CG32806	chrX	1790077	1790174	98	*	CG32806	90162	2	0	2	4.68e-08	2.65e-06	down	-2.68376	Promoter (<=1kb)	6	1789566	1790418	853	1	FBgn0052806	FBtr0070301	511
Mst85C	chr3R	9049258	9049260	3	*	Mst85C	69283	1	0	1	2.25e-08	1.8e-06	down	-2.68245	Promoter (<=1kb)	4	9042508	9049247	6740	2	FBgn0010222	FBtr0081997	-11
Nmdmc	chr3R	9049258	9049260	3	*	Nmdmc	69283	1	0	1	2.25e-08	1.8e-06	down	-2.68245	Promoter (<=1kb)	4	9042508	9049247	6740	2	FBgn0010222	FBtr0081997	-11
FucT6	chrX	11709660	11709826	167	*	FucT6	96790	2	0	2	9.34e-05	0.000218944	down	-2.68139	Promoter (<=1kb)	6	11706575	11709951	3377	2	FBgn0030327	FBtr0073620	125
dtn	chrX	6225718	6225720	3	*	dtn	93181	1	0	1	5.43e-06	3.35e-05	down	-2.68103	Promoter (<=1kb)	6	6225647	6233166	7520	1	FBgn0262730	FBtr0307165	71
Pect	chr2L	13204669	13204671	3	*	Pect	10230	1	0	1	1.09e-09	6.43e-07	down	-2.67958	Promoter (<=1kb)	1	13203762	13210828	7067	1	FBgn0032482	FBtr0334752	907
Usp47	chr3L	5753147	5753149	3	*	Usp47	43751	1	0	1	1.4e-06	1.6e-05	down	-2.67936	Promoter (<=1kb)	3	5752973	5761886	8914	1	FBgn0016756	FBtr0306259	174
Taf12	chr3R	11679591	11679593	3	*	Taf12	71312	1	0	1	3.11e-07	7.44e-06	down	-2.67852	Promoter (<=1kb)	4	11678386	11679690	1305	2	FBgn0011290	FBtr0082440	97
verm	chr3L	19694757	19694825	69	*	verm	54628	2	0	2	1.43e-06	1.63e-05	down	-2.67842	Promoter (<=1kb)	3	19690033	19695260	5228	2	FBgn0261341	FBtr0302335	435
NTPase	chr2L	2883979	2883981	3	*	NTPase	2145	1	0	1	3.01e-05	9.69e-05	down	-2.6783	Promoter (<=1kb)	1	2880705	2883126	2422	2	FBgn0024947	FBtr0077683	-853
Karybeta3	chr3R	4649805	4649907	103	*	Karybeta3	65809	2	0	2	1.26e-07	4.5e-06	down	-2.67759	Promoter (<=1kb)	4	4649354	4654624	5271	1	FBgn0087013	FBtr0336462	451
mRpL16	chrX	1890262	1890264	3	*	mRpL16	90245	1	0	1	3.62e-06	2.65e-05	down	-2.67691	Promoter (<=1kb)	6	1890256	1891482	1227	1	FBgn0023519	FBtr0332579	6
RunxB	chrX	20538620	20538622	3	*	RunxB	102997	1	0	1	0.00188242	0.00255958	down	-2.6765	Promoter (<=1kb)	6	20538497	20567097	28601	1	FBgn0259162	FBtr0332385	123
lncRNA:CR44930	chr3R	6765883	6765885	3	*	lncRNA:CR44930	67520	1	0	1	2.04e-07	5.83e-06	down	-2.6761	Promoter (<=1kb)	4	6765485	6766709	1225	1	FBgn0266235	FBtr0343900	398
Usp16-45	chrX	5422138	5422140	3	*	Usp16-45	92608	1	0	1	1.98e-08	1.68e-06	down	-2.67569	Promoter (<=1kb)	6	5422183	5426906	4724	1	FBgn0029763	FBtr0070775	-43
CG9338	chr2L	20865604	20865606	3	*	CG9338	15718	1	0	1	4.14e-06	2.86e-05	down	-2.67221	Promoter (<=1kb)	1	20865215	20867709	2495	1	FBgn0032899	FBtr0333009	389
TM9SF2	chr2L	20734059	20734177	119	*	TM9SF2	15598	2	0	2	1.01e-05	4.82e-05	down	-2.66936	Promoter (<=1kb)	1	20730416	20734309	3894	2	FBgn0032880	FBtr0335149	132
CG33774	chr2R	9400318	9400320	3	*	CG33774	26449	1	0	1	0.0003851	0.000673978	down	-2.669	Promoter (<=1kb)	2	9399753	9400329	577	2	FBgn0053774	FBtr0091775	9
lncRNA:CR44761	chr2R	22673589	22673591	3	*	lncRNA:CR44761	36960	1	0	1	5.83e-07	1.02e-05	down	-2.66734	Promoter (<=1kb)	2	22673195	22673695	501	2	FBgn0265982	FBtr0343004	104
Rab1	chr3R	21268388	21268390	3	*	Rab1	79047	1	0	1	3.77e-09	8.27e-07	down	-2.66673	Promoter (<=1kb)	4	21266029	21269060	3032	2	FBgn0285937	FBtr0084104	670
lncRNA:CR44550	chr3L	12301778	12301780	3	*	lncRNA:CR44550	48951	1	0	1	1e-07	3.96e-06	down	-2.66613	Promoter (<=1kb)	3	12302162	12302551	390	2	FBgn0265744	FBtr0340701	771
zip	chr2R	25011106	25011108	3	*	zip	39048	1	0	1	8.42e-06	4.34e-05	down	-2.66568	Promoter (<=1kb)	2	24990948	25011208	20261	2	FBgn0265434	FBtr0302574	100
MFS14	chr2R	18802295	18802439	145	*	MFS14	33980	2	0	2	5.39e-05	0.000145375	down	-2.66497	Promoter (<=1kb)	2	18796975	18802405	5431	2	FBgn0010651	FBtr0345426	0
Rim2	chr2L	1724301	1724346	46	*	Rim2	1341	2	0	2	2.38e-07	6.37e-06	down	-2.66435	Promoter (<=1kb)	1	1716244	1724388	8145	2	FBgn0031359	FBtr0305618	42
Sgf29	chr2R	21293178	21293180	3	*	Sgf29	35890	1	0	1	1.93e-06	1.89e-05	down	-2.6629	Promoter (<=1kb)	2	21292239	21293441	1203	2	FBgn0050390	FBtr0071617	261
Optix	chr2R	8032087	8032182	96	*	Optix	25252	2	0	2	3.58e-06	2.63e-05	down	-2.65995	Promoter (<=1kb)	2	8031593	8042529	10937	1	FBgn0025360	FBtr0088865	494
raskol	chrX	17710328	17710330	3	*	raskol	101019	1	0	1	1.63e-09	7.38e-07	down	-2.65912	Promoter (<=1kb)	6	17710144	17752007	41864	1	FBgn0261570	FBtr0302834	184
Prosalpha7	chr2R	9847502	9847667	166	*	Prosalpha7	26847	3	0	3	4.81e-06	3.12e-05	down	-2.65875	Promoter (<=1kb)	2	9846636	9847836	1201	2	FBgn0023175	FBtr0089998	169
CG42304	chr3L	2653116	2653118	3	*	CG42304	41504	1	0	1	1.83e-05	7.04e-05	down	-2.6586	Promoter (<=1kb)	3	2653294	2655455	2162	1	FBgn0259200	FBtr0344666	-176
Snup	chr3L	2653116	2653118	3	*	Snup	41504	1	0	1	1.83e-05	7.04e-05	down	-2.6586	Promoter (<=1kb)	3	2653294	2655455	2162	1	FBgn0259200	FBtr0344666	-176
asRNA:CR44704	chr2R	21071629	21071667	39	*	asRNA:CR44704	35720	2	0	2	4.61e-06	3.04e-05	down	-2.65793	Promoter (<=1kb)	2	21070749	21071895	1147	1	FBgn0265915	FBtr0342841	880
Dl	chr3R	19325115	19325264	150	*	Dl	77496	2	0	2	7.29e-06	3.99e-05	down	-2.6579	Promoter (<=1kb)	4	19302731	19326217	23487	2	FBgn0000463	FBtr0083739	953
CG9941	chrX	13721629	13721631	3	*	CG9941	98102	1	0	1	6.77e-06	3.82e-05	down	-2.65773	Promoter (<=1kb)	6	13718734	13721977	3244	2	FBgn0030514	FBtr0073843	346
CG34125	chr2L	4966359	4966361	3	*	CG34125	3848	1	0	1	2.23e-06	2.03e-05	down	-2.65692	Promoter (<=1kb)	1	4965673	4966399	727	1	FBgn0083961	FBtr0110839	686
CG9008	chr2L	13777133	13777135	3	*	CG9008	10570	1	0	1	3.92e-07	8.32e-06	down	-2.65543	Promoter (<=1kb)	1	13777195	13778124	930	1	FBgn0051845	FBtr0307578	-60
Ziz	chr2L	7496300	7496302	3	*	Ziz	5879	1	0	1	4.72e-09	9e-07	down	-2.65483	Promoter (<=1kb)	1	7472513	7496307	23795	2	FBgn0260486	FBtr0330721	5
Su(var)205	chr2L	8210993	8210995	3	*	Su(var)205	6490	1	0	1	1.93e-05	7.27e-05	down	-2.65482	Promoter (<=1kb)	1	8209626	8211122	1497	2	FBgn0003607	FBtr0079635	127
CG3277	chr2L	3304178	3304180	3	*	CG3277	2440	1	0	1	4.4e-07	8.83e-06	down	-2.65415	Promoter (<=1kb)	1	3304100	3317418	13319	1	FBgn0031518	FBtr0114460	78
fd59A	chr2R	22869099	22869101	3	*	fd59A	37145	1	0	1	4.27e-07	8.72e-06	down	-2.65343	Promoter (<=1kb)	2	22868159	22870706	2548	1	FBgn0004896	FBtr0071898	940
aPKC	chr2R	14958836	14958861	26	*	aPKC	30890	2	0	2	3.98e-07	8.37e-06	down	-2.65271	Promoter (<=1kb)	2	14946106	14958456	12351	2	FBgn0261854	FBtr0303435	-380
jp	chr2L	9560256	9560258	3	*	jp	7475	1	0	1	2.25e-06	2.04e-05	down	-2.65255	Promoter (<=1kb)	1	9549014	9560181	11168	2	FBgn0032129	FBtr0304056	-75
l(2)gl	chr2L	18553	18555	3	*	l(2)gl	10	1	0	1	2.09e-06	1.97e-05	down	-2.65067	Promoter (<=1kb)	1	9839	18570	8732	2	FBgn0002121	FBtr0078170	15
CG30334	chr2R	12440870	12440872	3	*	CG30334	29004	1	0	1	9.97e-07	1.35e-05	down	-2.65036	Promoter (<=1kb)	2	12440633	12441320	688	2	FBgn0050334	FBtr0087949	448
Dyb	chr2R	12440870	12440872	3	*	Dyb	29004	1	0	1	9.97e-07	1.35e-05	down	-2.65036	Promoter (<=1kb)	2	12440633	12441320	688	2	FBgn0050334	FBtr0087949	448
CG15717	chrX	13128968	13129062	95	*	CG15717	97748	2	0	2	9.51e-08	3.88e-06	down	-2.6498	Promoter (<=1kb)	6	13129018	13130290	1273	1	FBgn0030451	FBtr0073723	0
MFS10	chrX	13128968	13129062	95	*	MFS10	97748	2	0	2	9.51e-08	3.88e-06	down	-2.6498	Promoter (<=1kb)	6	13129018	13130290	1273	1	FBgn0030451	FBtr0073723	0
Ttd14	chr2R	18440132	18440157	26	*	Ttd14	33685	2	0	2	9.24e-07	1.3e-05	down	-2.64823	Promoter (<=1kb)	2	18430315	18440475	10161	2	FBgn0284257	FBtr0113361	318
l(1)G0320	chrX	9553636	9553921	286	*	l(1)G0320	95399	3	0	3	3.89e-07	8.29e-06	down	-2.648	Promoter (<=1kb)	6	9551140	9553661	2522	2	FBgn0028327	FBtr0343412	0
dpr1	chr2R	20699093	20699095	3	*	dpr1	35422	1	0	1	8.4e-05	0.000202083	down	-2.64709	Promoter (<=1kb)	2	20698483	20750442	51960	1	FBgn0040726	FBtr0086238	610
dpr15	chr3R	12158492	12158517	26	*	dpr15	71675	2	0	2	4.25e-07	8.7e-06	down	-2.64627	Promoter (<=1kb)	4	12138833	12158595	19763	2	FBgn0037993	FBtr0082549	78
Tdrd3	chr3L	14787097	14787338	242	*	Tdrd3	50784	3	0	3	6.62e-06	3.77e-05	down	-2.64351	Promoter (<=1kb)	3	14786791	14789665	2875	1	FBgn0036450	FBtr0075691	306
CG8531	chr2R	14256638	14256762	125	*	CG8531	30387	2	0	2	2.51e-06	2.17e-05	down	-2.64281	Promoter (<=1kb)	2	14256493	14258787	2295	1	FBgn0033918	FBtr0087538	145
CG13896	chr3L	711518	711610	93	*	CG13896	39852	3	0	3	4.69e-08	2.65e-06	down	-2.64117	Promoter (<=1kb)	3	710820	711819	1000	2	FBgn0035159	FBtr0072602	209
Sulf1	chr3R	16322375	16322556	182	*	Sulf1	75057	2	0	2	2.5e-07	6.57e-06	down	-2.6407	Promoter (<=1kb)	4	16321838	16322189	352	1	FBgn0264836	FBtr0334698	537
Orco	chr3R	5412262	5412264	3	*	Orco	66424	1	0	1	2.01e-08	1.68e-06	down	-2.64041	Promoter (<=1kb)	4	5407183	5412406	5224	2	FBgn0037324	FBtr0113193	142
CG12112	chrX	8559111	8559113	3	*	CG12112	94755	1	0	1	4.09e-08	2.46e-06	down	-2.6396	Promoter (<=1kb)	6	8555239	8558781	3543	2	FBgn0026679	FBtr0071234	-330
Ubi-p5E	chrX	6278618	6278662	45	*	Ubi-p5E	93220	3	0	3	4.71e-07	9.11e-06	down	-2.63904	Promoter (<=1kb)	6	6276977	6279274	2298	2	FBgn0086558	FBtr0070933	612
CSN8	chr2L	8364987	8364989	3	*	CSN8	6631	1	0	1	0.000673363	0.00107102	down	-2.63891	Promoter (<=1kb)	1	8364855	8365663	809	1	FBgn0261437	FBtr0079646	132
CenB1A	chr3R	23118436	23118438	3	*	CenB1A	80571	1	0	1	8.19e-05	0.000198132	down	-2.6389	Promoter (<=1kb)	4	23118400	23124217	5818	1	FBgn0039056	FBtr0084368	36
snf	chrX	5309405	5309518	114	*	snf	92537	2	0	2	2.22e-05	7.93e-05	down	-2.63851	Promoter (<=1kb)	6	5309242	5310501	1260	1	FBgn0003449	FBtr0070748	163
Hasp	chr2L	19516728	19516854	127	*	Hasp	14804	2	0	2	5.05e-07	9.52e-06	down	-2.63846	Promoter (<=1kb)	1	19514510	19516681	2172	2	FBgn0032797	FBtr0299519	-47
CG31955	chr2L	3712747	3712890	144	*	CG31955	2824	2	0	2	2.94e-07	7.15e-06	down	-2.63739	Promoter (<=1kb)	1	3711881	3712866	986	2	FBgn0051955	FBtr0345543	0
lncRNA:CR44505	chr2R	19683923	19684094	172	*	lncRNA:CR44505	34600	2	0	2	1.99e-08	1.68e-06	down	-2.63706	Promoter (<=1kb)	2	19683495	19684195	701	2	FBgn0265698	FBtr0340597	101
CG13229	chr2R	11171446	11171448	3	*	CG13229	27812	1	0	1	9.43e-06	4.64e-05	down	-2.63399	Promoter (<=1kb)	2	11139304	11172206	32903	2	FBgn0033579	FBtr0330602	758
boca	chr2R	7566522	7566524	3	*	boca	24847	1	0	1	1.68e-07	5.26e-06	down	-2.63321	Promoter (<=1kb)	2	7565873	7566738	866	2	FBgn0004132	FBtr0088953	214
CG31030	chr3R	30165548	30165644	97	*	CG31030	86133	2	0	2	4.61e-07	9.01e-06	down	-2.63262	Promoter (<=1kb)	4	30164692	30166419	1728	2	FBgn0051030	FBtr0085579	775
spab	chr2R	8967666	8967805	140	*	spab	26095	3	0	3	1.24e-06	1.51e-05	down	-2.63212	Promoter (<=1kb)	2	8963164	8968184	5021	2	FBgn0033358	FBtr0088671	379
lncRNA:CR45217	chr3R	24230575	24230577	3	*	lncRNA:CR45217	81592	1	0	1	2.91e-09	7.91e-07	down	-2.63113	Promoter (<=1kb)	4	24230562	24250248	19687	1	FBgn0043884	FBtr0334943	13
mask	chr3R	24230575	24230577	3	*	mask	81592	1	0	1	2.91e-09	7.91e-07	down	-2.63113	Promoter (<=1kb)	4	24230562	24250248	19687	1	FBgn0043884	FBtr0334943	13
CG2046	chr3R	5793793	5793795	3	*	CG2046	66781	1	0	1	2.26e-07	6.18e-06	down	-2.63064	Promoter (<=1kb)	4	5793308	5794317	1010	2	FBgn0037378	FBtr0078668	522
CysRS-m	chr2R	14161259	14161261	3	*	CysRS-m	30300	1	0	1	2.1e-05	7.65e-05	down	-2.62979	Promoter (<=1kb)	2	14159096	14161262	2167	2	FBgn0033900	FBtr0339965	1
upSET	chr3L	14002402	14002404	3	*	upSET	50200	1	0	1	8.67e-08	3.7e-06	down	-2.62971	Promoter (<=1kb)	3	14002127	14020148	18022	1	FBgn0036398	FBtr0333050	275
DIP-alpha	chrX	3568876	3568878	3	*	DIP-alpha	91489	1	0	1	2.42e-08	1.88e-06	down	-2.62948	Promoter (<=1kb)	6	3569504	3572000	2497	1	FBgn0052792	FBtr0307180	-626
ppk8	chrX	3568876	3568878	3	*	ppk8	91489	1	0	1	2.42e-08	1.88e-06	down	-2.62948	Promoter (<=1kb)	6	3569504	3572000	2497	1	FBgn0052792	FBtr0307180	-626
cue	chr3L	1517232	1517279	48	*	cue	40534	2	0	2	2.2e-07	6.08e-06	down	-2.62906	Promoter (<=1kb)	3	1503226	1517271	14046	2	FBgn0011204	FBtr0072706	0
Psa	chr3L	1517232	1517279	48	*	Psa	40534	2	0	2	2.2e-07	6.08e-06	down	-2.62906	Promoter (<=1kb)	3	1503226	1517271	14046	2	FBgn0011204	FBtr0072706	0
Nrd1	chrX	11868786	11868788	3	*	Nrd1	96916	1	0	1	1.69e-06	1.77e-05	down	-2.62757	Promoter (<=1kb)	6	11864651	11868893	4243	2	FBgn0030344	FBtr0073601	105
CG1486	chrX	21324267	21324269	3	*	CG1486	103468	1	0	1	2.22e-09	7.57e-07	down	-2.62712	Promoter (<=1kb)	6	21324067	21328150	4084	1	FBgn0031174	FBtr0077191	200
CG33199	chr2R	8951038	8951123	86	*	CG33199	26082	2	0	2	2.93e-07	7.15e-06	down	-2.62703	Promoter (<=1kb)	2	8948113	8951086	2974	2	FBgn0033356	FBtr0290279	0
CG8229	chr2R	8951038	8951123	86	*	CG8229	26082	2	0	2	2.93e-07	7.15e-06	down	-2.62703	Promoter (<=1kb)	2	8948113	8951086	2974	2	FBgn0033356	FBtr0290279	0
Naam	chr3R	19672525	19672527	3	*	Naam	77816	1	0	1	2.7e-06	2.25e-05	down	-2.62515	Promoter (<=1kb)	4	19672277	19672349	73	2	FBgn0012003	FBtr0083799	-176
CG8892	chr2L	4981348	4981350	3	*	CG8892	3860	1	0	1	1.25e-08	1.34e-06	down	-2.62441	Promoter (<=1kb)	1	4979537	4981311	1775	2	FBgn0031664	FBtr0079046	-37
CG13365	chrX	620877	620879	3	*	CG13365	89243	1	0	1	3.7e-07	8.09e-06	down	-2.62215	Promoter (<=1kb)	6	620421	620597	177	2	FBgn0286917	FBtr0475142	-280
ca	chr3R	29807192	29807756	565	*	ca	85801	5	0	5	1.03e-06	1.37e-05	down	-2.62125	Promoter (<=1kb)	4	29807238	29814846	7609	1	FBgn0000247	FBtr0346613	0
esg	chr2L	15333988	15333990	3	*	esg	11826	1	0	1	1e-07	3.97e-06	down	-2.62043	Promoter (<=1kb)	1	15333866	15336138	2273	1	FBgn0001981	FBtr0080734	122
lncRNA:CR43256	chr2R	5127357	5127446	90	*	lncRNA:CR43256	22591	2	0	2	1.08e-05	5.06e-05	down	-2.61988	Promoter (<=1kb)	2	5127249	5129296	2048	1	FBgn0262901	FBtr0306314	108
lncRNA:CR45979	chr3L	6505944	6505946	3	*	lncRNA:CR45979	44404	1	0	1	5.03e-08	2.72e-06	down	-2.61936	Promoter (<=1kb)	3	6505569	6506393	825	1	FBgn0267641	FBtr0347096	375
sfl	chr3L	6505944	6505946	3	*	sfl	44404	1	0	1	5.03e-08	2.72e-06	down	-2.61936	Promoter (<=1kb)	3	6505569	6506393	825	1	FBgn0267641	FBtr0347096	375
lncRNA:CR44024	chr4	427677	427679	3	*	lncRNA:CR44024	88041	1	0	1	7.71e-07	1.19e-05	down	-2.61892	Promoter (<=1kb)	5	427331	431769	4439	1	FBgn0264794	FBtr0334481	346
GCC185	chr3R	12010866	12010868	3	*	GCC185	71575	1	0	1	9.87e-09	1.22e-06	down	-2.61857	Promoter (<=1kb)	4	12010772	12015059	4288	1	FBgn0037979	FBtr0113224	94
Naa30A	chrX	1342231	1342233	3	*	Naa30A	89770	1	0	1	2.14e-06	1.99e-05	down	-2.61841	Promoter (<=1kb)	6	1342106	1344770	2665	1	FBgn0024362	FBtr0070209	125
Cul1	chr2R	7917468	7917636	169	*	Cul1	25133	2	0	2	1.07e-07	4.09e-06	down	-2.61727	Promoter (<=1kb)	2	7917178	7920898	3721	1	FBgn0015509	FBtr0088848	290
Axn	chr3R	30025432	30025434	3	*	Axn	86017	1	0	1	5.3e-07	9.72e-06	down	-2.61534	Promoter (<=1kb)	4	30026218	30026872	655	1	FBgn0267780	FBtr0347345	-784
CG9967	chr2L	2312320	2312322	3	*	CG9967	1746	1	0	1	1.63e-08	1.53e-06	down	-2.61442	Promoter (<=1kb)	1	2311680	2358944	47265	1	FBgn0031414	FBtr0344663	640
eys	chr2L	2312320	2312322	3	*	eys	1746	1	0	1	1.63e-08	1.53e-06	down	-2.61442	Promoter (<=1kb)	1	2311680	2358944	47265	1	FBgn0031414	FBtr0344663	640
CG44521	chr3L	5713760	5713762	3	*	CG44521	43710	1	0	1	1.35e-06	1.57e-05	down	-2.61431	Promoter (<=1kb)	3	5713331	5714029	699	1	FBgn0265714	FBtr0340657	429
CG43345	chr2L	21167741	21167743	3	*	CG43345	15912	1	0	1	1.29e-07	4.57e-06	down	-2.61095	Promoter (<=1kb)	1	21166046	21168349	2304	2	FBgn0263050	FBtr0306974	606
CG43346	chr2L	21167741	21167743	3	*	CG43346	15912	1	0	1	1.29e-07	4.57e-06	down	-2.61095	Promoter (<=1kb)	1	21166046	21168349	2304	2	FBgn0263050	FBtr0306974	606
CG11752	chrX	11350150	11350217	68	*	CG11752	96569	3	0	3	1.12e-05	5.16e-05	down	-2.61081	Promoter (<=1kb)	6	11349998	11350474	477	1	FBgn0030292	FBtr0073452	152
RpL5	chr2L	22536671	22536673	3	*	RpL5	17203	1	0	1	9.91e-08	3.94e-06	down	-2.61072	Promoter (<=1kb)	1	22533917	22536687	2771	2	FBgn0064225	FBtr0332633	14
HmgD	chr2R	21707273	21707573	301	*	HmgD	36230	3	0	3	8.39e-09	1.17e-06	down	-2.61059	Promoter (<=1kb)	2	21697990	21707861	9872	2	FBgn0010228	FBtr0345488	288
HmgZ	chr2R	21707273	21707573	301	*	HmgZ	36230	3	0	3	8.39e-09	1.17e-06	down	-2.61059	Promoter (<=1kb)	2	21697990	21707861	9872	2	FBgn0010228	FBtr0345488	288
unc-5	chr2R	15350239	15350241	3	*	unc-5	31166	1	0	1	4.4e-07	8.83e-06	down	-2.6102	Promoter (<=1kb)	2	15350133	15368300	18168	1	FBgn0034013	FBtr0087382	106
CG15237	chr2R	6809766	6809768	3	*	CG15237	24229	1	0	1	0.000643332	0.0010305	down	-2.60867	Promoter (<=1kb)	2	6809044	6809766	723	2	FBgn0033104	FBtr0086212	0
anox	chrX	21319198	21319200	3	*	anox	103461	1	0	1	3.05e-09	7.91e-07	down	-2.60824	Promoter (<=1kb)	6	21317936	21319213	1278	2	FBgn0064116	FBtr0091702	13
SLIRP1	chrX	21319198	21319200	3	*	SLIRP1	103461	1	0	1	3.05e-09	7.91e-07	down	-2.60824	Promoter (<=1kb)	6	21317936	21319213	1278	2	FBgn0064116	FBtr0091702	13
Jupiter	chr3R	11619426	11619428	3	*	Jupiter	71252	1	0	1	1.33e-05	5.74e-05	down	-2.60809	Promoter (<=1kb)	4	11590386	11619906	29521	2	FBgn0051363	FBtr0082452	478
CG15270	chr2L	15075144	15075146	3	*	CG15270	11619	1	0	1	3.39e-09	8.14e-07	down	-2.60508	Promoter (<=1kb)	1	15074776	15096915	22140	1	FBgn0028879	FBtr0344792	368
CycG	chr3R	31610901	31610903	3	*	CycG	87358	1	0	1	9.26e-07	1.3e-05	down	-2.60427	Promoter (<=1kb)	4	31596642	31610978	14337	2	FBgn0039858	FBtr0333328	75
Pc	chr3L	21317842	21317844	3	*	Pc	55958	1	0	1	1.24e-06	1.51e-05	down	-2.60427	Promoter (<=1kb)	3	21306138	21318020	11883	2	FBgn0003042	FBtr0078405	176
RpL40	chr2L	4228031	4228420	390	*	RpL40	3170	5	0	5	0.000178416	0.000361672	down	-2.60381	Promoter (<=1kb)	1	4227699	4228561	863	1	FBgn0003941	FBtr0334787	332
GlyP	chr2L	2131051	2131249	199	*	GlyP	1577	4	0	4	1.01e-05	4.83e-05	down	-2.6034	Promoter (<=1kb)	1	2130813	2137296	6484	1	FBgn0004507	FBtr0077828	238
Gadd45	chr2R	7249484	7249720	237	*	Gadd45	24521	4	0	4	4.61e-07	9.01e-06	down	-2.60339	Promoter (<=1kb)	2	7249161	7250655	1495	1	FBgn0033153	FBtr0089049	323
iPLA2-VIA	chr3L	9864035	9864037	3	*	iPLA2-VIA	47098	1	0	1	1.42e-06	1.62e-05	down	-2.60334	Promoter (<=1kb)	3	9860217	9864349	4133	2	FBgn0036053	FBtr0076362	312
CG32225	chr3L	20305601	20305603	3	*	CG32225	55048	1	0	1	2.44e-06	2.14e-05	down	-2.60331	Promoter (<=1kb)	3	20304310	20306283	1974	2	FBgn0052225	FBtr0074845	680
tRNA:Gln-CTG-2-5	chr2L	2013204	2013259	56	*	tRNA:Gln-CTG-2-5	1524	2	0	2	2.49e-08	1.91e-06	down	-2.60299	Promoter (<=1kb)	1	2013179	2013250	72	2	FBgn0051669	FBtr0077860	0
hyx	chr3R	9039333	9039335	3	*	hyx	69271	1	0	1	3.77e-07	8.16e-06	down	-2.60257	Promoter (<=1kb)	4	9020348	9039471	19124	2	FBgn0002932	FBtr0082001	136
neur	chr3R	9039333	9039335	3	*	neur	69271	1	0	1	3.77e-07	8.16e-06	down	-2.60257	Promoter (<=1kb)	4	9020348	9039471	19124	2	FBgn0002932	FBtr0082001	136
Uba2	chr3L	8127505	8127507	3	*	Uba2	45529	1	0	1	0.000170209	0.000348458	down	-2.59932	Promoter (<=1kb)	3	8127762	8131675	3914	1	FBgn0010350	FBtr0346546	-255
IP3K1	chr2L	9782188	9782471	284	*	IP3K1	7697	3	0	3	7.46e-05	0.000184505	down	-2.59853	Promoter (<=1kb)	1	9782384	9788499	6116	1	FBgn0032147	FBtr0079869	0
ssh	chr3R	24944789	24944791	3	*	ssh	82245	1	0	1	9.9e-07	1.35e-05	down	-2.59819	Promoter (<=1kb)	4	24938710	24944956	6247	2	FBgn0029157	FBtr0084799	165
ATPsynCF6	chr3R	23355397	23355399	3	*	ATPsynCF6	80786	1	0	1	0.000359422	0.000637017	down	-2.59724	Promoter (<=1kb)	4	23355255	23356011	757	2	FBgn0016119	FBtr0305982	612
Rap2l	chr2R	24063536	24063660	125	*	Rap2l	38242	2	0	2	2.14e-07	5.99e-06	down	-2.59659	Promoter (<=1kb)	2	24064135	24065405	1271	1	FBgn0283666	FBtr0343334	-475
lncRNA:CR43719	chr2L	309169	309171	3	*	lncRNA:CR43719	238	1	0	1	7.56e-06	4.07e-05	down	-2.59655	Promoter (<=1kb)	1	308537	309348	812	2	FBgn0263872	FBtr0329830	177
Plc21C	chr2L	309169	309171	3	*	Plc21C	238	1	0	1	7.56e-06	4.07e-05	down	-2.59655	Promoter (<=1kb)	1	308537	309348	812	2	FBgn0263872	FBtr0329830	177
inc	chrX	1496108	1496110	3	*	inc	89908	1	0	1	5.13e-08	2.75e-06	down	-2.59552	Promoter (<=1kb)	6	1486226	1496196	9971	2	FBgn0053513	FBtr0301843	86
Nmdar2	chrX	1496108	1496110	3	*	Nmdar2	89908	1	0	1	5.13e-08	2.75e-06	down	-2.59552	Promoter (<=1kb)	6	1486226	1496196	9971	2	FBgn0053513	FBtr0301843	86
FoxK	chr3L	11120778	11120780	3	*	FoxK	47987	1	0	1	2.83e-09	7.91e-07	down	-2.59452	Promoter (<=1kb)	3	11114169	11120783	6615	2	FBgn0036134	FBtr0301967	3
Nup93-1	chrX	13822931	13823080	150	*	Nup93-1	98193	2	0	2	1.09e-06	1.41e-05	down	-2.59415	Promoter (<=1kb)	6	13822826	13825910	3085	1	FBgn0027537	FBtr0073828	105
CG8036	chr3R	8670616	8670808	193	*	CG8036	68975	3	0	3	4.26e-07	8.71e-06	down	-2.59395	Promoter (<=1kb)	4	8670651	8673702	3052	1	FBgn0037607	FBtr0081883	0
p	chr3R	8670616	8670808	193	*	p	68975	3	0	3	4.26e-07	8.71e-06	down	-2.59395	Promoter (<=1kb)	4	8670651	8673702	3052	1	FBgn0037607	FBtr0081883	0
Ire1	chr3R	19860684	19860686	3	*	Ire1	77984	1	0	1	1.61e-05	6.48e-05	down	-2.59381	Promoter (<=1kb)	4	19853908	19861291	7384	2	FBgn0261984	FBtr0113248	605
NaCP60E	chr2R	24892306	24892308	3	*	NaCP60E	38943	1	0	1	9.99e-09	1.22e-06	down	-2.5893	Promoter (<=1kb)	2	24891614	24921677	30064	1	FBgn0085434	FBtr0308345	692
spidey	chrX	7909511	7909513	3	*	spidey	94290	1	0	1	9.14e-07	1.29e-05	down	-2.5885	Promoter (<=1kb)	6	7908931	7911885	2955	1	FBgn0029975	FBtr0071091	580
Rsf1	chr2L	10262692	10262704	13	*	Rsf1	8051	2	0	2	3.27e-06	2.49e-05	down	-2.58775	Promoter (<=1kb)	1	10261795	10263554	1760	2	FBgn0011305	FBtr0333411	850
side-II	chr2L	14923776	14923778	3	*	side-II	11512	1	0	1	1.32e-06	1.55e-05	down	-2.58729	Promoter (<=1kb)	1	14924590	14930565	5976	1	FBgn0028887	FBtr0080675	-812
RpS28a	chr3R	30022547	30022549	3	*	RpS28a	86016	1	0	1	1.3e-06	1.54e-05	down	-2.58606	Promoter (<=1kb)	4	30022345	30022648	304	2	FBgn0039739	FBtr0085601	99
CG13244	chr2L	15917464	15917466	3	*	CG13244	12264	1	0	1	3.34e-07	7.68e-06	down	-2.58542	Promoter (<=1kb)	1	15916888	15917607	720	1	FBgn0032577	FBtr0080792	576
r	chrX	16656293	16656295	3	*	r	100181	1	0	1	6.11e-06	3.6e-05	down	-2.58467	Promoter (<=1kb)	6	16656091	16668712	12622	1	FBgn0003189	FBtr0340155	202
Gr21a	chr2L	781289	781291	3	*	Gr21a	669	1	0	1	3.49e-07	7.86e-06	down	-2.58464	Promoter (<=1kb)	1	781276	782885	1610	1	FBgn0041250	FBtr0331651	13
Torsin	chrX	4649197	4649199	3	*	Torsin	92187	1	0	1	7.36e-06	4.01e-05	down	-2.5845	Promoter (<=1kb)	6	4648592	4649833	1242	2	FBgn0025615	FBtr0070690	634
AsnRS	chr2L	19131819	19131821	3	*	AsnRS	14519	1	0	1	1.52e-05	6.26e-05	down	-2.58394	Promoter (<=1kb)	1	19129469	19131954	2486	2	FBgn0086443	FBtr0332578	133
moody	chrX	2050082	2050102	21	*	moody	90363	2	0	2	0.00117975	0.00171771	down	-2.58218	Promoter (<=1kb)	6	2044292	2050120	5829	2	FBgn0025631	FBtr0303043	18
Hr51	chr2R	15331387	15331570	184	*	Hr51	31156	2	0	2	4.73e-06	3.09e-05	down	-2.58189	Promoter (<=1kb)	2	15331325	15339384	8060	1	FBgn0034012	FBtr0114456	62
Liprin-alpha	chr2L	6724075	6724077	3	*	Liprin-alpha	5207	1	0	1	0.000252506	0.000477582	down	-2.57947	Promoter (<=1kb)	1	6723903	6732766	8864	1	FBgn0046704	FBtr0329941	172
bmm	chr3L	14785853	14785980	128	*	bmm	50783	2	0	2	5.95e-09	9.98e-07	down	-2.57922	Promoter (<=1kb)	3	14776496	14786412	9917	2	FBgn0036449	FBtr0075699	432
Eps-15	chr2R	24768481	24768558	78	*	Eps-15	38826	2	0	2	6.44e-05	0.000165307	down	-2.57802	Promoter (<=1kb)	2	24766744	24768172	1429	2	FBgn0027590	FBtr0305310	-309
CG34310	chr2L	6673953	6673955	3	*	CG34310	5138	1	0	1	5.23e-07	9.66e-06	down	-2.578	Promoter (<=1kb)	1	6673964	6674741	778	1	FBgn0085339	FBtr0112506	-9
cup	chr2L	6673953	6673955	3	*	cup	5138	1	0	1	5.23e-07	9.66e-06	down	-2.578	Promoter (<=1kb)	1	6673964	6674741	778	1	FBgn0085339	FBtr0112506	-9
Atg18b	chr2L	21220426	21220428	3	*	Atg18b	15954	1	0	1	2.88e-06	2.33e-05	down	-2.57773	Promoter (<=1kb)	1	21212322	21220572	8251	2	FBgn0032935	FBtr0331678	144
pb	chr3R	6741180	6741182	3	*	pb	67492	1	0	1	6.39e-06	3.69e-05	down	-2.57741	Promoter (<=1kb)	4	6707800	6742063	34264	2	FBgn0051481	FBtr0089276	881
Tsp42Ef	chr2R	7025563	7025565	3	*	Tsp42Ef	24375	1	0	1	1.34e-06	1.57e-05	down	-2.57727	Promoter (<=1kb)	2	7025010	7028082	3073	1	FBgn0033127	FBtr0089023	553
CG34354	chr3R	28147852	28147854	3	*	CG34354	84529	1	0	1	1.4e-07	4.77e-06	down	-2.57665	Promoter (<=1kb)	4	28146392	28146962	571	2	FBgn0267747	FBtr0347314	-890
unc-13-4A	chr3L	7312769	7312771	3	*	unc-13-4A	44924	1	0	1	2.05e-07	5.85e-06	down	-2.57613	Promoter (<=1kb)	3	7266192	7312896	46705	2	FBgn0035756	FBtr0333368	125
lin-28	chr3L	5657355	5657357	3	*	lin-28	43661	1	0	1	1.05e-09	6.43e-07	down	-2.57543	Promoter (<=1kb)	3	5657913	5749599	91687	1	FBgn0085447	FBtr0330122	-556
CG1090	chr3R	4359928	4359930	3	*	CG1090	65545	1	0	1	9.37e-09	1.22e-06	down	-2.57539	Promoter (<=1kb)	4	4359883	4366855	6973	1	FBgn0037238	FBtr0335203	45
CG3634	chr3L	20809137	20809139	3	*	CG3634	55569	1	0	1	2.15e-07	6.01e-06	down	-2.57423	Promoter (<=1kb)	3	20806868	20809247	2380	2	FBgn0037026	FBtr0078272	108
cv-c	chr3R	14404562	14404564	3	*	cv-c	73408	1	0	1	6.98e-06	3.89e-05	down	-2.57357	Promoter (<=1kb)	4	14391683	14405450	13768	2	FBgn0285955	FBtr0112631	886
lncRNA:CR43963	chrX	12718583	12718585	3	*	lncRNA:CR43963	97460	1	0	1	4.09e-08	2.46e-06	down	-2.57298	Promoter (<=1kb)	6	12717624	12718460	837	2	FBgn0264678	FBtr0333775	-123
Smr	chrX	12718583	12718585	3	*	Smr	97460	1	0	1	4.09e-08	2.46e-06	down	-2.57298	Promoter (<=1kb)	6	12717624	12718460	837	2	FBgn0264678	FBtr0333775	-123
Set	chr3R	15263813	15263848	36	*	Set	74084	2	0	2	0.0001	0.000230751	down	-2.57273	Promoter (<=1kb)	4	15263552	15265253	1702	1	FBgn0014879	FBtr0083062	261
CG14408	chrX	14831753	14831755	3	*	CG14408	98780	1	0	1	1.21e-08	1.32e-06	down	-2.57215	Promoter (<=1kb)	6	14826867	14832033	5167	2	FBgn0030581	FBtr0340466	278
CG3257	chr2R	24116950	24116952	3	*	CG3257	38304	1	0	1	6.8e-08	3.21e-06	down	-2.57204	Promoter (<=1kb)	2	24116792	24123263	6472	1	FBgn0034978	FBtr0072252	158
atms	chr3R	4768307	4768309	3	*	atms	65924	1	0	1	2.07e-07	5.87e-06	down	-2.57183	Promoter (<=1kb)	4	4750409	4768528	18120	2	FBgn0264907	FBtr0334965	219
CG44098	chr3R	4768307	4768309	3	*	CG44098	65924	1	0	1	2.07e-07	5.87e-06	down	-2.57183	Promoter (<=1kb)	4	4750409	4768528	18120	2	FBgn0264907	FBtr0334965	219
grn	chr3R	8181085	8181194	110	*	grn	68605	3	0	3	5.55e-06	3.4e-05	down	-2.57166	Promoter (<=1kb)	4	8147368	8181444	34077	2	FBgn0001138	FBtr0081808	250
CG5214	chr3R	11244460	11244462	3	*	CG5214	70953	1	0	1	4.6e-07	9.01e-06	down	-2.57116	Promoter (<=1kb)	4	11244302	11246862	2561	1	FBgn0037891	FBtr0082358	158
Mgstl	chrX	21043248	21043382	135	*	Mgstl	103262	2	0	2	2.01e-07	5.79e-06	down	-2.57102	Promoter (<=1kb)	6	21043070	21044107	1038	1	FBgn0025814	FBtr0077243	178
dia	chr2L	20758799	20758801	3	*	dia	15612	1	0	1	3.47e-07	7.85e-06	down	-2.56962	Promoter (<=1kb)	1	20758144	20768053	9910	1	FBgn0011202	FBtr0335145	655
stac	chr3R	25056792	25056794	3	*	stac	82332	1	0	1	5.23e-09	9.51e-07	down	-2.56955	Promoter (<=1kb)	4	25057019	25064348	7330	1	FBgn0266719	FBtr0303025	-225
NfI	chr4	275626	275628	3	*	NfI	87933	1	0	1	3.24e-08	2.2e-06	down	-2.56951	Promoter (<=1kb)	5	268175	276369	8195	2	FBgn0042696	FBtr0333678	741
lark	chr3L	7339613	7339615	3	*	lark	44951	1	0	1	1.94e-06	1.89e-05	down	-2.56812	Promoter (<=1kb)	3	7339464	7341893	2430	1	FBgn0011640	FBtr0076845	149
snz	chrX	7912444	7912446	3	*	snz	94296	1	0	1	2.29e-07	6.2e-06	down	-2.56796	Promoter (<=1kb)	6	7912089	7918444	6356	1	FBgn0029976	FBtr0340148	355
betaTub56D	chr2R	19448553	19448738	186	*	betaTub56D	34473	4	0	4	8.73e-09	1.19e-06	down	-2.56705	Promoter (<=1kb)	2	19447319	19449599	2281	2	FBgn0284243	FBtr0086537	861
Fem-1	chr2R	20665499	20665501	3	*	Fem-1	35405	1	0	1	3.36e-08	2.22e-06	down	-2.56609	Promoter (<=1kb)	2	20662474	20665639	3166	2	FBgn0034542	FBtr0086246	138
Hsp70Bb	chr3R	12506054	12506185	132	*	Hsp70Bb	71971	2	0	2	3.58e-07	7.99e-06	down	-2.56505	Promoter (<=1kb)	4	12505793	12508139	2347	1	FBgn0013278	FBtr0082637	261
CG7943	chr3R	30046549	30046652	104	*	CG7943	86036	2	0	2	5.13e-05	0.000140504	down	-2.5644	Promoter (<=1kb)	4	30046470	30048665	2196	1	FBgn0039741	FBtr0085559	79
T48	chr3R	26881758	26881886	129	*	T48	83586	2	0	2	5.55e-06	3.4e-05	down	-2.56423	Promoter (<=1kb)	4	26881734	26910997	29264	1	FBgn0004359	FBtr0336724	24
pre-mod(mdg4)-E	chr3R	21365345	21365347	3	*	pre-mod(mdg4)-E	79121	1	0	1	6.88e-08	3.24e-06	down	-2.56407	Promoter (<=1kb)	4	21362968	21365290	2323	2	FBgn0266172	FBtr0433517	-55
epsilonCOP	chr2L	6489578	6489580	3	*	epsilonCOP	5008	1	0	1	1.18e-05	5.34e-05	down	-2.56336	Promoter (<=1kb)	1	6489090	6490194	1105	1	FBgn0027496	FBtr0079261	488
mRpL43	chr2R	23698343	23698345	3	*	mRpL43	37848	1	0	1	2.01e-06	1.93e-05	down	-2.56333	Promoter (<=1kb)	2	23698105	23699014	910	1	FBgn0034893	FBtr0072084	238
CG7430	chr3L	17847245	17847247	3	*	CG7430	53239	1	0	1	0.000998532	0.00149078	down	-2.56274	Promoter (<=1kb)	3	17847036	17849372	2337	1	FBgn0036762	FBtr0331810	209
bon	chr3R	20593798	20593800	3	*	bon	78448	1	0	1	4.63e-06	3.05e-05	down	-2.56249	Promoter (<=1kb)	4	20593139	20612540	19402	1	FBgn0023097	FBtr0334639	659
CG11398	chrX	1215047	1215049	3	*	CG11398	89684	1	0	1	1.01e-05	4.82e-05	down	-2.56227	Promoter (<=1kb)	6	1211989	1215156	3168	2	FBgn0040366	FBtr0345522	107
Hacd2	chr2L	13445495	13445497	3	*	Hacd2	10437	1	0	1	1.13e-06	1.44e-05	down	-2.56217	Promoter (<=1kb)	1	13444103	13445651	1549	2	FBgn0032524	FBtr0080519	154
CG13287	chr3L	5882830	5883049	220	*	CG13287	43870	3	0	3	2.44e-06	2.14e-05	down	-2.55852	Promoter (<=1kb)	3	5882304	5884090	1787	1	FBgn0035643	FBtr0330086	526
ktub	chr2R	21102494	21102646	153	*	ktub	35746	2	0	2	3.02e-05	9.72e-05	down	-2.55714	Promoter (<=1kb)	2	21101928	21123704	21777	1	FBgn0015721	FBtr0342842	566
CG1737	chrX	11350757	11350759	3	*	CG1737	96570	1	0	1	6.16e-06	3.62e-05	down	-2.55554	Promoter (<=1kb)	6	11350608	11355539	4932	1	FBgn0030293	FBtr0340049	149
CG14042	chr2L	5038628	5038659	32	*	CG14042	3927	2	0	2	8.27e-08	3.59e-06	down	-2.55447	Promoter (<=1kb)	1	5039067	5040622	1556	1	FBgn0260470	FBtr0333534	-408
SP555	chr2L	5038628	5038659	32	*	SP555	3927	2	0	2	8.27e-08	3.59e-06	down	-2.55447	Promoter (<=1kb)	1	5039067	5040622	1556	1	FBgn0260470	FBtr0333534	-408
CG46312	chrX	15990978	15990986	9	*	CG46312	99707	2	0	2	2.86e-07	7.09e-06	down	-2.55424	Promoter (<=1kb)	6	15987166	15990307	3142	2	FBgn0030719	FBtr0074150	-671
eIF5	chrX	15990978	15990986	9	*	eIF5	99707	2	0	2	2.86e-07	7.09e-06	down	-2.55424	Promoter (<=1kb)	6	15987166	15990307	3142	2	FBgn0030719	FBtr0074150	-671
Pgk	chr2L	2751861	2751863	3	*	Pgk	2030	1	0	1	9.86e-09	1.22e-06	down	-2.55396	Promoter (<=1kb)	1	2752445	2757920	5476	1	FBgn0031453	FBtr0335125	-582
eIF3l	chr3L	12146036	12146038	3	*	eIF3l	48839	1	0	1	1.25e-09	6.69e-07	down	-2.55291	Promoter (<=1kb)	3	12143446	12146097	2652	2	FBgn0036258	FBtr0076022	59
CG14966	chr3L	3197005	3197192	188	*	CG14966	41856	3	0	3	2.96e-06	2.36e-05	down	-2.55113	Promoter (<=1kb)	3	3197045	3197631	587	2	FBgn0035415	FBtr0073108	439
Hsp83	chr3L	3197005	3197192	188	*	Hsp83	41856	3	0	3	2.96e-06	2.36e-05	down	-2.55113	Promoter (<=1kb)	3	3197045	3197631	587	2	FBgn0035415	FBtr0073108	439
Iru	chr3R	9006789	9006979	191	*	Iru	69245	2	0	2	6.77e-05	0.000171489	down	-2.55108	Promoter (<=1kb)	4	9006456	9008030	1575	1	FBgn0037653	FBtr0081965	333
Gtp-bp	chrX	11128683	11128685	3	*	Gtp-bp	96442	1	0	1	0.00015331	0.000321071	down	-2.55063	Promoter (<=1kb)	6	11126877	11129087	2211	2	FBgn0010391	FBtr0073480	402
Coq9	chr2R	7699484	7699486	3	*	Coq9	24958	1	0	1	5.94e-08	3e-06	down	-2.55009	Promoter (<=1kb)	2	7699500	7701878	2379	1	FBgn0050496	FBtr0088926	-14
CG8134	chrX	15704767	15704769	3	*	CG8134	99434	1	0	1	2.15e-06	2e-05	down	-2.54843	Promoter (<=1kb)	6	15704125	15705806	1682	1	FBgn0030671	FBtr0344214	642
Ac78C	chr3L	21171223	21171225	3	*	Ac78C	55837	1	0	1	4.78e-08	2.66e-06	down	-2.54794	Promoter (<=1kb)	3	21136447	21171930	35484	2	FBgn0024150	FBtr0301701	705
eEF1beta	chr2R	16869020	16869076	57	*	eEF1beta	32478	2	0	2	4.07e-06	2.83e-05	down	-2.54781	Promoter (<=1kb)	2	16869402	16871851	2450	1	FBgn0034162	FBtr0087042	-326
shrb	chr2R	9143670	9143808	139	*	shrb	26273	2	0	2	1.91e-06	1.88e-05	down	-2.54775	Promoter (<=1kb)	2	9142146	9143914	1769	2	FBgn0086656	FBtr0088623	106
wrd	chr3R	18169725	18169727	3	*	wrd	76518	1	0	1	3.33e-08	2.22e-06	down	-2.5467	Promoter (<=1kb)	4	18168778	18177241	8464	1	FBgn0042693	FBtr0305034	947
CG4645	chrX	12911440	12911611	172	*	CG4645	97571	2	0	2	1.39e-05	5.91e-05	down	-2.54649	Promoter (<=1kb)	6	12912560	12913009	450	1	FBgn0267185	FBtr0346317	-949
l(3)mbt	chr3R	27273268	27273270	3	*	l(3)mbt	83963	1	0	1	2.66e-09	7.91e-07	down	-2.54489	Promoter (<=1kb)	4	27266326	27273273	6948	2	FBgn0002441	FBtr0085175	3
CG14411	chrX	14832919	14832921	3	*	CG14411	98781	1	0	1	3.69e-08	2.34e-06	down	-2.54461	Promoter (<=1kb)	6	14832647	14836262	3616	1	FBgn0030582	FBtr0073947	272
pasha	chr3R	31618084	31618086	3	*	pasha	87363	1	0	1	1.77e-06	1.81e-05	down	-2.54392	Promoter (<=1kb)	4	31617977	31621474	3498	1	FBgn0039861	FBtr0085820	107
CG33090	chr2L	14334288	14334514	227	*	CG33090	11059	3	0	3	6.41e-06	3.7e-05	down	-2.54276	Promoter (<=1kb)	1	14334158	14345795	11638	1	FBgn0028916	FBtr0343675	130
Lsm12a	chrX	12018812	12018852	41	*	Lsm12a	97039	3	0	3	1.31e-05	5.69e-05	down	-2.54266	Promoter (<=1kb)	6	12018640	12020719	2080	1	FBgn0030364	FBtr0073621	172
CG6770	chr2L	12045850	12045852	3	*	CG6770	9470	1	0	1	1.58e-07	5.09e-06	down	-2.54166	Promoter (<=1kb)	1	12045343	12046118	776	2	FBgn0032400	FBtr0080306	266
hfw	chrX	1670337	1670339	3	*	hfw	90067	1	0	1	1.22e-06	1.5e-05	down	-2.54093	Promoter (<=1kb)	6	1669570	1673608	4039	1	FBgn0001189	FBtr0333115	767
CG5445	chrX	17301379	17301381	3	*	CG5445	100737	1	0	1	3.05e-09	7.91e-07	down	-2.54051	Promoter (<=1kb)	6	17285704	17301929	16226	2	FBgn0024238	FBtr0074441	548
Fim	chrX	17301379	17301381	3	*	Fim	100737	1	0	1	3.05e-09	7.91e-07	down	-2.54051	Promoter (<=1kb)	6	17285704	17301929	16226	2	FBgn0024238	FBtr0074441	548
Ptpmeg2	chrX	9641001	9641003	3	*	Ptpmeg2	95472	1	0	1	5.37e-08	2.83e-06	down	-2.53913	Promoter (<=1kb)	6	9628722	9640624	11903	2	FBgn0028341	FBtr0333427	-377
CG30491	chr2R	7655513	7655515	3	*	CG30491	24918	1	0	1	0.00252508	0.00329834	down	-2.53852	Promoter (<=1kb)	2	7655398	7656770	1373	1	FBgn0050491	FBtr0336997	115
unc-119	chrX	7291164	7291166	3	*	unc-119	93837	1	0	1	2.56e-06	2.19e-05	down	-2.53756	Promoter (<=1kb)	6	7288367	7291298	2932	2	FBgn0025549	FBtr0346619	132
lncRNA:CR45643	chr3R	16223757	16223759	3	*	lncRNA:CR45643	74975	1	0	1	2.04e-07	5.83e-06	down	-2.53729	Promoter (<=1kb)	4	16223600	16223854	255	1	FBgn0267203	FBtr0346358	157
lncRNA:CR45654	chr3R	25846072	25846074	3	*	lncRNA:CR45654	82916	1	0	1	6.97e-06	3.88e-05	down	-2.53727	Promoter (<=1kb)	4	25845678	25846318	641	1	FBgn0267214	FBtr0346371	394
asRNA:CR45648	chr3R	22724384	22724482	99	*	asRNA:CR45648	80277	2	0	2	1.33e-05	5.74e-05	down	-2.53717	Promoter (<=1kb)	4	22724348	22724678	331	1	FBgn0267208	FBtr0346364	36
Irp-1A	chr3R	22724384	22724482	99	*	Irp-1A	80277	2	0	2	1.33e-05	5.74e-05	down	-2.53717	Promoter (<=1kb)	4	22724348	22724678	331	1	FBgn0267208	FBtr0346364	36
CG34402	chr3R	12387122	12387124	3	*	CG34402	71850	1	0	1	4.62e-07	9.01e-06	down	-2.53704	Promoter (<=1kb)	4	12387188	12388794	1607	1	FBgn0053098	FBtr0332161	-64
Hsp70Ab	chr3R	11958808	11958810	3	*	Hsp70Ab	71531	1	0	1	5.06e-05	0.000139076	down	-2.53694	Promoter (<=1kb)	4	11958535	11960909	2375	1	FBgn0013276	FBtr0082482	273
otp	chr2R	20903266	20903331	66	*	otp	35569	2	0	2	2.39e-05	8.34e-05	down	-2.53583	Promoter (<=1kb)	2	20883625	20903414	19790	2	FBgn0015524	FBtr0290289	83
por	chrX	18379712	18379714	3	*	por	101522	1	0	1	9.67e-06	4.71e-05	down	-2.53503	Promoter (<=1kb)	6	18377521	18379851	2331	2	FBgn0004957	FBtr0074577	137
ens	chr3L	4134379	4134381	3	*	ens	42587	1	0	1	1.63e-05	6.53e-05	down	-2.53483	Promoter (<=1kb)	3	4122907	4134550	11644	2	FBgn0264693	FBtr0345589	169
gw	chr4	660596	660598	3	*	gw	88230	1	0	1	3.85e-09	8.32e-07	down	-2.53435	Promoter (<=1kb)	5	649971	660608	10638	2	FBgn0051992	FBtr0089096	10
Pfk	chr2R	10110303	10110305	3	*	Pfk	27101	1	0	1	5.38e-08	2.83e-06	down	-2.5329	Promoter (<=1kb)	2	10109740	10117137	7398	1	FBgn0003071	FBtr0333067	563
Ciao1	chr2R	14854766	14854768	3	*	Ciao1	30787	1	0	1	4.36e-05	0.00012523	down	-2.5328	Promoter (<=1kb)	2	14853863	14855048	1186	2	FBgn0033972	FBtr0087460	280
Appl	chrX	570419	570421	3	*	Appl	89205	1	0	1	4.66e-07	9.06e-06	down	-2.53255	Promoter (<=1kb)	6	569903	570003	101	1	FBgn0263534	FBtr0309626	516
CG43689	chrX	4076100	4076102	3	*	CG43689	91785	1	0	1	1.33e-08	1.38e-06	down	-2.53171	Promoter (<=1kb)	6	4075978	4092237	16260	1	FBgn0263772	FBtr0339681	122
ringer	chr3L	16357406	16357477	72	*	ringer	52025	2	0	2	4.12e-06	2.85e-05	down	-2.53109	Promoter (<=1kb)	3	16354746	16356448	1703	2	FBgn0266417	FBtr0344401	-958
CG3386	chr3L	681977	681979	3	*	CG3386	39825	1	0	1	3.6e-06	2.64e-05	down	-2.53089	Promoter (<=1kb)	3	680436	682061	1626	2	FBgn0035152	FBtr0333379	82
CG5059	chr3L	20517063	20517065	3	*	CG5059	55271	1	0	1	1.71e-06	1.78e-05	down	-2.52994	Promoter (<=1kb)	3	20514598	20517304	2707	2	FBgn0037007	FBtr0078218	239
CG13917	chr3L	1587231	1587247	17	*	CG13917	40594	2	0	2	0.000153697	0.000321715	down	-2.52973	Promoter (<=1kb)	3	1586694	1600845	14152	1	FBgn0035237	FBtr0347066	537
CG1965	chr3R	7067434	7067597	164	*	CG1965	67722	2	0	2	3.78e-08	2.38e-06	down	-2.52937	Promoter (<=1kb)	4	7067401	7071624	4224	1	FBgn0037466	FBtr0334667	33
CG42809	chr2L	13457616	13457618	3	*	CG42809	10442	1	0	1	9.58e-08	3.89e-06	down	-2.52705	Promoter (<=1kb)	1	13457497	13458073	577	1	FBgn0261991	FBtr0303820	119
CG1888	chr2R	9548006	9548008	3	*	CG1888	26583	1	0	1	6.18e-09	1.01e-06	down	-2.52672	Promoter (<=1kb)	2	9545172	9548135	2964	2	FBgn0033421	FBtr0310031	127
Pka-R2	chr2R	10011667	10011669	3	*	Pka-R2	27000	1	0	1	1.26e-07	4.5e-06	down	-2.52415	Promoter (<=1kb)	2	10012093	10012199	107	2	FBgn0263557	FBtr0309690	530
mRpS30	chrX	15786290	15786292	3	*	mRpS30	99524	1	0	1	1.04e-05	4.94e-05	down	-2.52363	Promoter (<=1kb)	6	15786047	15788288	2242	1	FBgn0030692	FBtr0346193	243
NPFR	chr3R	6187441	6187580	140	*	NPFR	67066	2	0	2	7e-08	3.26e-06	down	-2.52311	Promoter (<=1kb)	4	6187315	6195403	8089	1	FBgn0037408	FBtr0308318	126
Ggamma30A	chr2L	9272523	9272525	3	*	Ggamma30A	7283	1	0	1	0.00206179	0.00276784	down	-2.52299	Promoter (<=1kb)	1	9272502	9291798	19297	1	FBgn0267252	FBtr0336620	21
Vps13	chr2R	7567146	7567148	3	*	Vps13	24848	1	0	1	1.13e-07	4.22e-06	down	-2.52296	Promoter (<=1kb)	2	7566809	7580675	13867	1	FBgn0033194	FBtr0310024	337
Usp32	chr3L	19871240	19871242	3	*	Usp32	54715	1	0	1	7.21e-07	1.15e-05	down	-2.52236	Promoter (<=1kb)	3	19871139	19881783	10645	1	FBgn0036913	FBtr0332151	101
S6k	chr3L	5810303	5810463	161	*	S6k	43797	3	0	3	2.27e-05	8.05e-05	down	-2.52195	Promoter (<=1kb)	3	5797549	5810931	13383	2	FBgn0283472	FBtr0333264	468
rols	chr3L	12056379	12056381	3	*	rols	48737	1	0	1	4.15e-06	2.86e-05	down	-2.52087	Promoter (<=1kb)	3	12008225	12056474	48250	2	FBgn0041096	FBtr0076054	93
Hey	chr2R	7998087	7998089	3	*	Hey	25216	1	0	1	0.000159169	0.000330675	down	-2.52027	Promoter (<=1kb)	2	7995438	7998278	2841	2	FBgn0027788	FBtr0088869	189
Gfrl	chr3R	20484229	20484231	3	*	Gfrl	78357	1	0	1	1.35e-07	4.69e-06	down	-2.51958	Promoter (<=1kb)	4	20378458	20484588	106131	2	FBgn0262869	FBtr0346115	357
Arp3	chr3L	8115777	8115779	3	*	Arp3	45522	1	0	1	6.66e-07	1.1e-05	down	-2.51947	Promoter (<=1kb)	3	8113407	8115902	2496	2	FBgn0262716	FBtr0076737	123
CG6752	chr3R	15195140	15195413	274	*	CG6752	74005	3	0	3	5.27e-07	9.7e-06	down	-2.5187	Promoter (<=1kb)	4	15191058	15196055	4998	2	FBgn0038296	FBtr0306246	642
CG14089	chr3L	19280462	19281131	670	*	CG14089	54261	10	0	10	2.93e-05	9.52e-05	down	-2.51825	Promoter (<=1kb)	3	19280120	19280800	681	2	FBgn0036861	FBtr0075015	0
Fkbp14	chr2R	21497490	21497492	3	*	Fkbp14	36041	1	0	1	1.4e-05	5.93e-05	down	-2.51822	Promoter (<=1kb)	2	21487167	21497210	10044	2	FBgn0010470	FBtr0306013	-280
Cen	chr2L	20681323	20681325	3	*	Cen	15551	1	0	1	1.19e-05	5.35e-05	down	-2.51809	Promoter (<=1kb)	1	20678921	20681626	2706	2	FBgn0032876	FBtr0081401	301
CG1572	chrX	11557282	11557284	3	*	CG1572	96696	1	0	1	3.62e-06	2.64e-05	down	-2.51678	Promoter (<=1kb)	6	11555285	11556438	1154	2	FBgn0030309	FBtr0339694	-844
rdx	chr3R	13984069	13984071	3	*	rdx	73104	1	0	1	9.6e-07	1.32e-05	down	-2.51554	Promoter (<=1kb)	4	13967955	13983363	15409	2	FBgn0264493	FBtr0100361	-706
CG2691	chrX	13624307	13624434	128	*	CG2691	98038	2	0	2	3.76e-07	8.16e-06	down	-2.51553	Promoter (<=1kb)	6	13619276	13624408	5133	2	FBgn0030504	FBtr0340191	0
CG11768	chr3R	8767764	8767766	3	*	CG11768	69043	1	0	1	9.15e-06	4.55e-05	down	-2.51539	Promoter (<=1kb)	4	8749206	8768191	18986	2	FBgn0037625	FBtr0308890	425
CG34135	chr3R	8767764	8767766	3	*	CG34135	69043	1	0	1	9.15e-06	4.55e-05	down	-2.51539	Promoter (<=1kb)	4	8749206	8768191	18986	2	FBgn0037625	FBtr0308890	425
CG13698	chr3L	18105423	18105425	3	*	CG13698	53432	1	0	1	1.17e-06	1.47e-05	down	-2.51468	Promoter (<=1kb)	3	18088417	18106149	17733	2	FBgn0036773	FBtr0075137	724
CG6454	chr3R	24349398	24349400	3	*	CG6454	81719	1	0	1	1.19e-08	1.31e-06	down	-2.51306	Promoter (<=1kb)	4	24349182	24356241	7060	1	FBgn0039187	FBtr0330373	216
CG15822	chr3L	2163514	2163516	3	*	CG15822	41126	1	0	1	0.00954287	0.0107202	down	-2.51286	Promoter (<=1kb)	3	2153201	2163863	10663	2	FBgn0035308	FBtr0300831	347
CG42700	chr2R	12290712	12290714	3	*	CG42700	28785	1	0	1	4.01e-08	2.45e-06	down	-2.51223	Promoter (<=1kb)	2	12290789	12298247	7459	1	FBgn0261611	FBtr0302923	-75
Spn	chr3L	2553368	2553370	3	*	Spn	41435	1	0	1	1.25e-07	4.49e-06	down	-2.51121	Promoter (<=1kb)	3	2505245	2554292	49048	2	FBgn0010905	FBtr0304614	922
Eogt	chr2L	2381897	2381899	3	*	Eogt	1784	1	0	1	2.49e-06	2.16e-05	down	-2.50921	Promoter (<=1kb)	1	2381097	2383073	1977	1	FBgn0264672	FBtr0330685	800
Sec31	chr2R	8893684	8893686	3	*	Sec31	26016	1	0	1	3.83e-07	8.23e-06	down	-2.50861	Promoter (<=1kb)	2	8893613	8898798	5186	1	FBgn0033339	FBtr0345224	71
CG2818	chr2L	3713412	3713414	3	*	CG2818	2825	1	0	1	2.03e-07	5.83e-06	down	-2.50806	Promoter (<=1kb)	1	3713360	3716810	3451	1	FBgn0031566	FBtr0077537	52
brat	chr2L	19135562	19135703	142	*	brat	14522	3	0	3	4.82e-05	0.000134263	down	-2.50554	Promoter (<=1kb)	1	19133023	19135233	2211	2	FBgn0086447	FBtr0336628	-329
CG7903	chr3R	29994769	29994771	3	*	CG7903	85992	1	0	1	5.23e-05	0.000142223	down	-2.50529	Promoter (<=1kb)	4	29993475	29995231	1757	2	FBgn0039730	FBtr0085608	460
Tab2	chr2R	19292564	19292566	3	*	Tab2	34324	1	0	1	2.84e-06	2.31e-05	down	-2.50521	Promoter (<=1kb)	2	19292529	19304508	11980	1	FBgn0086358	FBtr0331925	35
RpS25	chr3R	11215618	11215905	288	*	RpS25	70921	3	0	3	1.33e-05	5.72e-05	down	-2.50506	Promoter (<=1kb)	4	11215028	11216287	1260	2	FBgn0086472	FBtr0082369	382
Clic	chrX	13821932	13822060	129	*	Clic	98192	3	1	2	3.94e-07	8.34e-06	down	-2.50486	Promoter (<=1kb)	6	13812971	13822307	9337	2	FBgn0030529	FBtr0073835	247
lncRNA:CR44945	chr3R	16783653	16783655	3	*	lncRNA:CR44945	75428	1	0	1	0.000101986	0.000234279	down	-2.50235	Promoter (<=1kb)	4	16783497	16784672	1176	1	FBgn0266250	FBtr0343917	156
CG8944	chrX	15745452	15745454	3	*	CG8944	99483	1	0	1	7.38e-05	0.000183019	down	-2.50157	Promoter (<=1kb)	6	15741343	15746231	4889	2	FBgn0030680	FBtr0074201	777
lncRNA:CR44121	chr2L	8205950	8205952	3	*	lncRNA:CR44121	6483	1	0	1	3.05e-07	7.34e-06	down	-2.50072	Promoter (<=1kb)	1	8205778	8206044	267	2	FBgn0264952	FBtr0335192	92
mRpS29	chr2R	22420289	22420291	3	*	mRpS29	36766	1	0	1	3.7e-07	8.08e-06	down	-2.49966	Promoter (<=1kb)	2	22418937	22420376	1440	2	FBgn0034727	FBtr0071842	85
tsh	chr2L	21828623	21828625	3	*	tsh	16399	1	0	1	2.43e-08	1.89e-06	down	-2.49958	Promoter (<=1kb)	1	21828593	21837011	8419	1	FBgn0003866	FBtr0085906	30
Hmgs	chr2R	16336083	16336182	100	*	Hmgs	32046	2	0	2	4.58e-05	0.000129273	down	-2.49945	Promoter (<=1kb)	2	16336090	16341242	5153	1	FBgn0010611	FBtr0087145	0
lncRNA:iab4	chr3R	16856219	16856221	3	*	lncRNA:iab4	75508	1	0	1	2.39e-05	8.34e-05	down	-2.49927	Promoter (<=1kb)	4	16856275	16856342	68	1	FBgn0262462	FBtr0304520	-54
Fer2	chr3R	16150386	16150433	48	*	Fer2	74904	2	0	2	0.000658541	0.00105159	down	-2.49866	Promoter (<=1kb)	4	16149369	16151312	1944	2	FBgn0038402	FBtr0301709	879
CG13366	chrX	619529	619531	3	*	CG13366	89241	1	0	1	7.56e-08	3.41e-06	down	-2.49842	Promoter (<=1kb)	6	610549	619723	9175	2	FBgn0025633	FBtr0339432	192
Cib2	chr2R	20880484	20880486	3	*	Cib2	35557	1	0	1	1.45e-07	4.88e-06	down	-2.49807	Promoter (<=1kb)	2	20879930	20882663	2734	1	FBgn0034558	FBtr0304717	554
glo	chr3R	11818821	11818955	135	*	glo	71449	2	0	2	3.4e-06	2.56e-05	down	-2.49729	Promoter (<=1kb)	4	11815206	11819071	3866	2	FBgn0259139	FBtr0089917	116
ct	chrX	7608721	7608723	3	*	ct	94088	1	0	1	1.1e-07	4.16e-06	down	-2.49696	Promoter (<=1kb)	6	7608428	7678859	70432	1	FBgn0004198	FBtr0331733	293
RpL7A	chrX	6531564	6531566	3	*	RpL7A	93358	1	0	1	1.24e-06	1.51e-05	down	-2.49615	Promoter (<=1kb)	6	6531635	6531701	67	2	FBgn0065071	FBtr0091642	135
msk	chr3L	8116483	8116485	3	*	msk	45523	1	0	1	3.98e-07	8.38e-06	down	-2.49607	Promoter (<=1kb)	3	8116179	8121579	5401	1	FBgn0026252	FBtr0076685	304
His1:CG33861	chr2L	21532296	21532298	3	*	His1:CG33861	16159	1	0	1	0.00149953	0.00210732	down	-2.49515	Promoter (<=1kb)	1	21532461	21533055	595	2	FBgn0053870	FBtr0091874	757
Arc1	chr2R	14360154	14360228	75	*	Arc1	30473	2	0	2	4.6e-07	9.01e-06	down	-2.49503	Promoter (<=1kb)	2	14357927	14360297	2371	2	FBgn0033926	FBtr0087560	69
CG6707	chr3L	9898558	9898560	3	*	CG6707	47137	1	0	1	9.63e-06	4.7e-05	down	-2.49318	Promoter (<=1kb)	3	9894807	9898575	3769	2	FBgn0036058	FBtr0076356	15
Rala	chrX	3719490	3719680	191	*	Rala	91555	3	0	3	0.000368265	0.000649656	down	-2.49274	Promoter (<=1kb)	6	3704610	3719635	15026	2	FBgn0015286	FBtr0070584	0
CG17333	chrX	10847490	10847724	235	*	CG17333	96195	3	0	3	1.27e-06	1.53e-05	down	-2.49209	Promoter (<=1kb)	6	10847438	10848534	1097	1	FBgn0030239	FBtr0073379	52
CG6340	chrX	15483057	15483059	3	*	CG6340	99252	1	0	1	4.43e-08	2.58e-06	down	-2.49201	Promoter (<=1kb)	6	15482374	15486612	4239	1	FBgn0030648	FBtr0310061	683
Tango11	chr2R	21717011	21717155	145	*	Tango11	36241	2	0	2	2.97e-06	2.36e-05	down	-2.49171	Promoter (<=1kb)	2	21717804	21718832	1029	1	FBgn0050398	FBtr0071710	-649
msps	chr3R	16051414	16051416	3	*	msps	74772	1	0	1	7.76e-08	3.47e-06	down	-2.49099	Promoter (<=1kb)	4	16051878	16060675	8798	1	FBgn0027948	FBtr0304803	-462
east	chrX	2011372	2011374	3	*	east	90324	1	0	1	2.04e-07	5.83e-06	down	-2.48922	Promoter (<=1kb)	6	2010860	2022652	11793	1	FBgn0261954	FBtr0307289	512
Bx42	chrX	9104114	9104116	3	*	Bx42	95090	1	0	1	8.45e-08	3.64e-06	down	-2.48892	Promoter (<=1kb)	6	9093612	9103739	10128	2	FBgn0030087	FBtr0343319	-375
pic	chr3R	13052389	13052391	3	*	pic	72383	1	0	1	1.65e-05	6.6e-05	down	-2.48569	Promoter (<=1kb)	4	13052245	13056725	4481	1	FBgn0260962	FBtr0082709	144
AIMP1	chr2R	8928004	8928071	68	*	AIMP1	26049	2	0	2	0.000515266	0.00085619	down	-2.48501	Promoter (<=1kb)	2	8927014	8928105	1092	2	FBgn0033351	FBtr0088676	34
Mnt	chrX	3687443	3687445	3	*	Mnt	91545	1	0	1	2.63e-07	6.78e-06	down	-2.48412	Promoter (<=1kb)	6	3688235	3700780	12546	1	FBgn0023215	FBtr0070578	-790
Pask	chr2R	23988838	23988840	3	*	Pask	38155	1	0	1	3.77e-07	8.16e-06	down	-2.48366	Promoter (<=1kb)	2	23988738	23992049	3312	1	FBgn0034950	FBtr0072160	100
Mgat2	chr3R	30022155	30022157	3	*	Mgat2	86015	1	0	1	6.8e-08	3.21e-06	down	-2.48181	Promoter (<=1kb)	4	30015513	30022221	6709	2	FBgn0039738	FBtr0085602	64
lncRNA:CR45276	chr2R	12206309	12206311	3	*	lncRNA:CR45276	28709	1	0	1	9.3e-07	1.3e-05	down	-2.48002	Promoter (<=1kb)	2	12206092	12207196	1105	1	FBgn0266814	FBtr0345530	217
RhoGEF2	chr2R	17027793	17028187	395	*	RhoGEF2	32574	4	0	4	4.92e-06	3.16e-05	down	-2.47984	Promoter (<=1kb)	2	17027190	17044653	17464	1	FBgn0023172	FBtr0340124	603
wuho	chrX	6288080	6288255	176	*	wuho	93233	2	0	2	1.8e-06	1.82e-05	down	-2.47972	Promoter (<=1kb)	6	6288100	6289562	1463	1	FBgn0029857	FBtr0070897	0
bys	chrX	7902052	7902214	163	*	bys	94281	2	0	2	0.000964974	0.00144881	down	-2.47897	Promoter (<=1kb)	6	7901880	7903643	1764	1	FBgn0010292	FBtr0071090	172
TM4SF	chr2R	23878600	23878735	136	*	TM4SF	38029	2	0	2	1.77e-07	5.39e-06	down	-2.47834	Promoter (<=1kb)	2	23878507	23880860	2354	1	FBgn0020372	FBtr0100255	93
Smg6	chr3R	25033445	25033447	3	*	Smg6	82309	1	0	1	1.79e-08	1.61e-06	down	-2.47794	Promoter (<=1kb)	4	25029429	25033465	4037	2	FBgn0039260	FBtr0084796	18
Dlic	chrX	11154576	11154578	3	*	Dlic	96456	1	0	1	3.62e-05	0.0001099	down	-2.47794	Promoter (<=1kb)	6	11154421	11164670	10250	1	FBgn0030276	FBtr0073443	155
CG9992	chrX	16384818	16384820	3	*	CG9992	99972	1	0	1	1.54e-06	1.68e-05	down	-2.47777	Promoter (<=1kb)	6	16381954	16384908	2955	2	FBgn0030744	FBtr0074306	88
ewg	chrX	276712	276714	3	*	ewg	88904	1	0	1	3.91e-08	2.42e-06	down	-2.47659	Promoter (<=1kb)	6	268524	276377	7854	2	FBgn0005427	FBtr0089442	-335
Rbfox1	chr3L	10516952	10516954	3	*	Rbfox1	47522	1	0	1	7.54e-07	1.17e-05	down	-2.4747	Promoter (<=1kb)	3	10516003	10594012	78010	1	FBgn0052062	FBtr0332985	949
CG5273	chrX	759715	759717	3	*	CG5273	89366	1	0	1	5.84e-05	0.000154165	down	-2.47329	Promoter (<=1kb)	6	759594	761939	2346	1	FBgn0040382	FBtr0070137	121
Adf1	chr2R	6662976	6663118	143	*	Adf1	24091	2	0	2	4.14e-08	2.48e-06	down	-2.4727	Promoter (<=1kb)	2	6662270	6668085	5816	1	FBgn0284249	FBtr0086113	706
haf	chr2L	1555219	1555221	3	*	haf	1231	1	0	1	7.81e-09	1.14e-06	down	-2.47262	Promoter (<=1kb)	1	1555129	1609389	54261	1	FBgn0261509	FBtr0310019	90
Grasp65	chr3L	19924861	19925350	490	*	Grasp65	54762	4	0	4	1.42e-06	1.62e-05	down	-2.47254	Promoter (<=1kb)	3	19924943	19927175	2233	1	FBgn0036919	FBtr0074895	0
RpL24-like	chr3R	11430865	11430867	3	*	RpL24-like	71104	1	0	1	0.000130189	0.000282582	down	-2.47224	Promoter (<=1kb)	4	11430740	11431582	843	2	FBgn0037899	FBtr0082403	715
DIP-delta	chr3L	5424675	5424683	9	*	DIP-delta	43503	2	0	2	7.17e-06	3.95e-05	down	-2.47168	Promoter (<=1kb)	3	5424109	5442399	18291	1	FBgn0085420	FBtr0333612	566
Hip14	chr3L	15988353	15988355	3	*	Hip14	51675	1	0	1	5.84e-05	0.000153987	down	-2.47079	Promoter (<=1kb)	3	15988236	15992464	4229	1	FBgn0259824	FBtr0333577	117
hbn	chr2R	20960463	20960615	153	*	hbn	35606	2	0	2	0.00701605	0.00812768	down	-2.47013	Promoter (<=1kb)	2	20954668	20960909	6242	2	FBgn0008636	FBtr0071556	294
CG42340	chrX	6524290	6524292	3	*	CG42340	93352	1	0	1	2.01e-08	1.68e-06	down	-2.46976	Promoter (<=1kb)	6	6423123	6524323	101201	2	FBgn0259242	FBtr0332386	31
hts	chr2R	19411217	19411219	3	*	hts	34440	1	0	1	7.66e-08	3.44e-06	down	-2.46868	Promoter (<=1kb)	2	19408855	19411361	2507	2	FBgn0263391	FBtr0309105	142
CG1607	chr3R	31384490	31384492	3	*	CG1607	87105	1	0	1	1.34e-07	4.68e-06	down	-2.46664	Promoter (<=1kb)	4	31384399	31391893	7495	1	FBgn0039844	FBtr0334549	91
tud	chr2R	21183843	21183845	3	*	tud	35802	1	0	1	2.36e-05	8.27e-05	down	-2.46524	Promoter (<=1kb)	2	21183322	21192913	9592	1	FBgn0003891	FBtr0342870	521
CG42837	chr2R	16197110	16197169	60	*	CG42837	31905	2	0	2	7.17e-07	1.14e-05	down	-2.46479	Promoter (<=1kb)	2	16197042	16199378	2337	1	FBgn0265178	FBtr0339086	68
CG44243	chr2R	16197110	16197169	60	*	CG44243	31905	2	0	2	7.17e-07	1.14e-05	down	-2.46479	Promoter (<=1kb)	2	16197042	16199378	2337	1	FBgn0265178	FBtr0339086	68
mip40	chr2R	19291906	19291908	3	*	mip40	34323	1	0	1	6.93e-08	3.25e-06	down	-2.46419	Promoter (<=1kb)	2	19291105	19292196	1092	2	FBgn0034430	FBtr0086560	288
CG44242	chr2R	16196756	16196758	3	*	CG44242	31904	1	0	1	1.49e-05	6.18e-05	down	-2.4637	Promoter (<=1kb)	2	16197042	16199378	2337	1	FBgn0262026	FBtr0303860	-284
CG31922	chr2L	1170286	1170288	3	*	CG31922	983	1	0	1	3.39e-05	0.000104927	down	-2.46307	Promoter (<=1kb)	1	1167172	1170365	3194	2	FBgn0024314	FBtr0344015	77
RpL39	chr2R	24061899	24062359	461	*	RpL39	38240	4	0	4	1.38e-05	5.89e-05	down	-2.4616	Promoter (<=1kb)	2	24061853	24062431	579	2	FBgn0023170	FBtr0072185	72
Dbx	chr3L	1921542	1921544	3	*	Dbx	40893	1	0	1	0.000404105	0.000701072	down	-2.46154	Promoter (<=1kb)	3	1921307	1933602	12296	1	FBgn0261723	FBtr0290136	235
hebe	chr2R	9834031	9834033	3	*	hebe	26837	1	0	1	0.000401889	0.000697802	down	-2.46091	Promoter (<=1kb)	2	9828104	9833572	5469	2	FBgn0033448	FBtr0113061	-459
mthl1	chrX	16641456	16641458	3	*	mthl1	100175	1	0	1	2.67e-08	1.97e-06	down	-2.46086	Promoter (<=1kb)	6	16640968	16650309	9342	1	FBgn0030766	FBtr0340150	488
CG2765	chr2R	24964483	24964505	23	*	CG2765	38998	2	0	2	5.62e-07	1e-05	down	-2.45993	Promoter (<=1kb)	2	24959841	24965076	5236	2	FBgn0035087	FBtr0308687	571
sens-2	chr2L	6822290	6822292	3	*	sens-2	5306	1	0	1	7.87e-06	4.17e-05	down	-2.4596	Promoter (<=1kb)	1	6822317	6838995	16679	1	FBgn0051632	FBtr0079341	-25
Amun	chrX	11715191	11715193	3	*	Amun	96799	1	0	1	2.61e-08	1.96e-06	down	-2.45647	Promoter (<=1kb)	6	11710824	11715030	4207	2	FBgn0030328	FBtr0303339	-161
CG15535	chr3R	30423820	30423822	3	*	CG15535	86290	1	0	1	1.25e-07	4.48e-06	down	-2.45643	Promoter (<=1kb)	4	30423032	30423929	898	2	FBgn0039764	FBtr0346511	107
snoRNA:Me18S-A1576	chr2L	9894801	9894803	3	*	snoRNA:Me18S-A1576	7764	1	0	1	0.000106883	0.00024258	down	-2.45606	Promoter (<=1kb)	1	9894795	9894907	113	2	FBgn0025881	FBtr0079907	104
eRF3	chr2L	12434565	12434608	44	*	eRF3	9702	2	0	2	1.66e-05	6.61e-05	down	-2.45562	Promoter (<=1kb)	1	12431878	12434665	2788	2	FBgn0265298	FBtr0089898	57
SC35	chr2L	12434565	12434608	44	*	SC35	9702	2	0	2	1.66e-05	6.61e-05	down	-2.45562	Promoter (<=1kb)	1	12431878	12434665	2788	2	FBgn0265298	FBtr0089898	57
CG7841	chr3L	15507991	15507993	3	*	CG7841	51310	1	0	1	1.5e-07	4.97e-06	down	-2.45457	Promoter (<=1kb)	3	15505188	15508252	3065	2	FBgn0036502	FBtr0334085	259
2mit	chr3R	13132306	13132308	3	*	2mit	72436	1	0	1	7.67e-08	3.44e-06	down	-2.45444	Promoter (<=1kb)	4	13124219	13132416	8198	2	FBgn0260793	FBtr0344730	108
timeout	chr3R	13132306	13132308	3	*	timeout	72436	1	0	1	7.67e-08	3.44e-06	down	-2.45444	Promoter (<=1kb)	4	13124219	13132416	8198	2	FBgn0260793	FBtr0344730	108
Sh3beta	chr3L	7368506	7368508	3	*	Sh3beta	44972	1	0	1	2.2e-07	6.08e-06	down	-2.45436	Promoter (<=1kb)	3	7366841	7368190	1350	2	FBgn0035772	FBtr0302546	-316
bun	chr2L	12507708	12507710	3	*	bun	9754	1	0	1	7.25e-07	1.15e-05	down	-2.45417	Promoter (<=1kb)	1	12507939	12508504	566	1	FBgn0262353	FBtr0475221	-229
trh	chr3L	376567	376712	146	*	trh	39538	2	0	2	2.84e-06	2.31e-05	down	-2.45372	Promoter (<=1kb)	3	366524	377316	10793	2	FBgn0262139	FBtr0304120	604
Naprt	chr2L	4197325	4197327	3	*	Naprt	3136	1	0	1	3.92e-08	2.43e-06	down	-2.45336	Promoter (<=1kb)	1	4189340	4197380	8041	2	FBgn0031589	FBtr0077483	53
CG1407	chr2R	10032621	10032623	3	*	CG1407	27014	1	0	1	3.27e-05	0.00010248	down	-2.45216	Promoter (<=1kb)	2	10028443	10032893	4451	2	FBgn0033474	FBtr0088435	270
lncRNA:CR44983	chr2L	3845317	3845319	3	*	lncRNA:CR44983	2928	1	0	1	1.98e-05	7.39e-05	down	-2.45131	Promoter (<=1kb)	1	3845130	3845716	587	2	FBgn0266318	FBtr0344048	397
capt	chr2L	1155580	1155582	3	*	capt	971	1	0	1	2.13e-08	1.75e-06	down	-2.45042	Promoter (<=1kb)	1	1151678	1156311	4634	2	FBgn0261458	FBtr0100023	729
CG17896	chrX	493283	493459	177	*	CG17896	89133	3	0	3	2.57e-05	8.73e-05	down	-2.44778	Promoter (<=1kb)	6	490787	493495	2709	2	FBgn0023537	FBtr0070092	36
sov	chrX	6756611	6756613	3	*	sov	93517	1	0	1	2.39e-08	1.88e-06	down	-2.44767	Promoter (<=1kb)	6	6756322	6770712	14391	1	FBgn0286831	FBtr0070961	289
lawc	chrX	8409577	8409579	3	*	lawc	94640	1	0	1	1.25e-08	1.34e-06	down	-2.4472	Promoter (<=1kb)	6	8409272	8433011	23740	1	FBgn0261793	FBtr0330106	305
Trf2	chrX	8409577	8409579	3	*	Trf2	94640	1	0	1	1.25e-08	1.34e-06	down	-2.4472	Promoter (<=1kb)	6	8409272	8433011	23740	1	FBgn0261793	FBtr0330106	305
MCTS1	chrX	6038031	6038246	216	*	MCTS1	93059	3	0	3	5.22e-06	3.27e-05	down	-2.44604	Promoter (<=1kb)	6	6037892	6039576	1685	1	FBgn0029833	FBtr0070867	139
BOD1	chr3R	27939059	27939061	3	*	BOD1	84411	1	0	1	2.01e-05	7.45e-05	down	-2.44577	Promoter (<=1kb)	4	27938562	27942778	4217	1	FBgn0039560	FBtr0335013	497
CG11961	chr2R	19357712	19357714	3	*	CG11961	34372	1	0	1	3.69e-07	8.08e-06	down	-2.44465	Promoter (<=1kb)	2	19357532	19362373	4842	1	FBgn0034436	FBtr0086519	180
CG3678	chr3R	16991454	16991606	153	*	CG3678	75610	2	1	1	3.5e-06	2.59e-05	down	-2.44461	Promoter (<=1kb)	4	16990334	16991878	1545	2	FBgn0038461	FBtr0337064	272
UGP	chr3L	9358895	9358897	3	*	UGP	46698	1	0	1	5.31e-09	9.62e-07	down	-2.44459	Promoter (<=1kb)	3	9351480	9358935	7456	2	FBgn0035978	FBtr0076500	38
Rab10	chrX	20251456	20251458	3	*	Rab10	102821	1	0	1	2.97e-06	2.36e-05	down	-2.44418	Promoter (<=1kb)	6	20251338	20254691	3354	1	FBgn0015789	FBtr0077337	118
N	chrX	3135312	3135314	3	*	N	91211	1	0	1	1.41e-06	1.61e-05	down	-2.44333	Promoter (<=1kb)	6	3134870	3172221	37352	1	FBgn0004647	FBtr0070507	442
CG8078	chr2R	9098285	9098287	3	*	CG8078	26236	1	0	1	5.92e-07	1.03e-05	down	-2.44223	Promoter (<=1kb)	2	9096931	9098525	1595	2	FBgn0033375	FBtr0088631	238
EDTP	chr2R	17444396	17444398	3	*	EDTP	32863	1	0	1	3.76e-06	2.7e-05	down	-2.44147	Promoter (<=1kb)	2	17432173	17444938	12766	2	FBgn0027506	FBtr0086958	540
lncRNA:CR43857	chr2L	7424848	7425023	176	*	lncRNA:CR43857	5819	2	0	2	1.21e-06	1.49e-05	down	-2.44057	Promoter (<=1kb)	1	7425795	7425892	98	1	FBgn0262453	FBtr0304472	-772
TAF1C-like	chr2R	21501450	21501638	189	*	TAF1C-like	36044	2	0	2	8.68e-06	4.41e-05	down	-2.4401	Promoter (<=1kb)	2	21498903	21501732	2830	2	FBgn0034631	FBtr0071701	94
Taf4	chr3L	16113957	16113959	3	*	Taf4	51807	1	0	1	1.11e-06	1.43e-05	down	-2.44005	Promoter (<=1kb)	3	16113790	16121368	7579	1	FBgn0010280	FBtr0075449	167
JMJD4	chr2L	18158310	18158312	3	*	JMJD4	13728	1	0	1	0.000632075	0.00101549	down	-2.43982	Promoter (<=1kb)	1	18157110	18158680	1571	2	FBgn0032671	FBtr0081062	368
Mdh1	chr2L	10396278	10396280	3	*	Mdh1	8160	1	0	1	3.38e-06	2.55e-05	down	-2.43978	Promoter (<=1kb)	1	10393847	10396275	2429	2	FBgn0262782	FBtr0080050	-3
SNF4Agamma	chr3R	21199772	21199774	3	*	SNF4Agamma	78991	1	0	1	3.63e-07	8.03e-06	down	-2.43917	Promoter (<=1kb)	4	21199181	21212687	13507	1	FBgn0264357	FBtr0301587	591
CG33143	chr2R	22615143	22615145	3	*	CG33143	36909	1	0	1	1.98e-08	1.68e-06	down	-2.43886	Promoter (<=1kb)	2	22614328	22634084	19757	1	FBgn0053143	FBtr0343010	815
CR43727	chr3L	16581679	16581681	3	*	CR43727	52220	1	0	1	0.000233052	0.00044776	down	-2.43799	Promoter (<=1kb)	3	16581637	16582767	1131	1	FBgn0263975	FBtr0347098	42
dpr8	chrX	14322320	14322455	136	*	dpr8	98525	2	1	1	4.91e-08	2.69e-06	down	-2.43742	Promoter (<=1kb)	6	14322226	14462351	140126	1	FBgn0052600	FBtr0343518	94
eRF1	chr3L	20349002	20349162	161	*	eRF1	55108	3	0	3	0.000213301	0.000416772	down	-2.43689	Promoter (<=1kb)	3	20348937	20353127	4191	1	FBgn0036974	FBtr0078178	65
CG12004	chr3L	1569273	1569275	3	*	CG12004	40577	1	0	1	4.83e-08	2.67e-06	down	-2.43676	Promoter (<=1kb)	3	1569181	1576330	7150	1	FBgn0035236	FBtr0345367	92
CG33523	chr3L	5927242	5927297	56	*	CG33523	43899	2	0	2	4.33e-09	8.68e-07	down	-2.4356	Promoter (<=1kb)	3	5926871	5929902	3032	1	FBgn0053523	FBtr0091478	371
CG10011	chr3R	28634928	28634930	3	*	CG10011	84825	1	0	1	2.7e-06	2.25e-05	down	-2.43483	Promoter (<=1kb)	4	28607939	28635099	27161	2	FBgn0039590	FBtr0085319	169
CG12118	chrX	9196024	9196095	72	*	CG12118	95168	2	0	2	7.96e-06	4.2e-05	down	-2.43379	Promoter (<=1kb)	6	9194750	9196414	1665	2	FBgn0030101	FBtr0071339	319
pAbp	chr2R	18141181	18141183	3	*	pAbp	33465	1	0	1	1.4e-05	5.93e-05	down	-2.43177	Promoter (<=1kb)	2	18141375	18147191	5817	1	FBgn0265297	FBtr0086740	-192
cas	chr3R	5716403	5716405	3	*	cas	66711	1	0	1	4.31e-07	8.75e-06	down	-2.43137	Promoter (<=1kb)	4	5712975	5716805	3831	2	FBgn0004878	FBtr0078725	400
Brf	chr3R	17380441	17380443	3	*	Brf	75949	1	0	1	4.57e-05	0.000129136	down	-2.43094	Promoter (<=1kb)	4	17379944	17390265	10322	1	FBgn0262871	FBtr0306210	497
lute	chr3R	17380441	17380443	3	*	lute	75949	1	0	1	4.57e-05	0.000129136	down	-2.43094	Promoter (<=1kb)	4	17379944	17390265	10322	1	FBgn0262871	FBtr0306210	497
p130CAS	chr3L	160455	160457	3	*	p130CAS	39339	1	0	1	2.2e-07	6.08e-06	down	-2.43013	Promoter (<=1kb)	3	160804	174517	13714	1	FBgn0035101	FBtr0301889	-347
CG1792	chr3R	31617705	31617746	42	*	CG1792	87362	3	1	2	7.65e-05	0.000188187	down	-2.42859	Promoter (<=1kb)	4	31617977	31621474	3498	1	FBgn0039861	FBtr0085820	-231
CG10654	chr3L	12507528	12507530	3	*	CG10654	49129	1	0	1	1.35e-08	1.38e-06	down	-2.42849	Promoter (<=1kb)	3	12505374	12507840	2467	2	FBgn0036294	FBtr0332644	310
CG34296	chr3R	29722776	29722778	3	*	CG34296	85730	1	0	1	7.87e-06	4.17e-05	down	-2.42844	Promoter (<=1kb)	4	29722538	29723013	476	1	FBgn0085325	FBtr0112492	238
NaPi-III	chr3L	11123876	11123878	3	*	NaPi-III	47990	1	0	1	4.38e-07	8.82e-06	down	-2.42803	Promoter (<=1kb)	3	11123348	11134663	11316	1	FBgn0260795	FBtr0301438	528
RpL18A	chr2R	17547223	17547225	3	*	RpL18A	32996	1	0	1	1.58e-07	5.09e-06	down	-2.42737	Promoter (<=1kb)	2	17546406	17547462	1057	2	FBgn0010409	FBtr0086947	237
CG13460	chr3L	15061072	15061074	3	*	CG13460	50949	1	0	1	0.000401176	0.000696799	down	-2.42553	Promoter (<=1kb)	3	15061029	15061705	677	2	FBgn0036471	FBtr0114510	631
Sytbeta	chr3L	15061072	15061074	3	*	Sytbeta	50949	1	0	1	0.000401176	0.000696799	down	-2.42553	Promoter (<=1kb)	3	15061029	15061705	677	2	FBgn0036471	FBtr0114510	631
Nup154	chr2L	11005331	11005333	3	*	Nup154	8608	1	0	1	0.000149086	0.000314197	down	-2.42455	Promoter (<=1kb)	1	11004820	11010921	6102	1	FBgn0021761	FBtr0340225	511
Pgant7	chrX	18499338	18499340	3	*	Pgant7	101593	1	0	1	0.00772735	0.00886386	down	-2.42277	Promoter (<=1kb)	6	18495184	18499872	4689	2	FBgn0030930	FBtr0074625	532
AcCoAS	chr3L	21280108	21280110	3	*	AcCoAS	55926	1	0	1	3.32e-08	2.21e-06	down	-2.4213	Promoter (<=1kb)	3	21271209	21279981	8773	2	FBgn0012034	FBtr0333126	-127
CadN2	chr2L	17812167	17812169	3	*	CadN2	13527	1	0	1	1.86e-05	7.11e-05	down	-2.42097	Promoter (<=1kb)	1	17811953	17812672	720	2	FBgn0262017	FBtr0303837	503
CG42830	chr2L	17812167	17812169	3	*	CG42830	13527	1	0	1	1.86e-05	7.11e-05	down	-2.42097	Promoter (<=1kb)	1	17811953	17812672	720	2	FBgn0262017	FBtr0303837	503
CG11986	chr3R	9016077	9016079	3	*	CG11986	69252	1	0	1	4.59e-06	3.04e-05	down	-2.42078	Promoter (<=1kb)	4	9015446	9016822	1377	1	FBgn0037656	FBtr0081967	631
Psf3	chrX	10385558	10385614	57	*	Psf3	95912	2	0	2	4.72e-07	9.12e-06	down	-2.42008	Promoter (<=1kb)	6	10383353	10385861	2509	2	FBgn0030196	FBtr0346350	247
gus	chr2R	5122198	5122200	3	*	gus	22587	1	0	1	3.41e-06	2.56e-05	down	-2.41936	Promoter (<=1kb)	2	5116990	5122247	5258	2	FBgn0026238	FBtr0309848	47
Fkbp39	chr3R	15332998	15333000	3	*	Fkbp39	74137	1	0	1	7.16e-06	3.94e-05	down	-2.41931	Promoter (<=1kb)	4	15331584	15333133	1550	2	FBgn0013269	FBtr0083120	133
Stlk	chr2R	4547609	4547611	3	*	Stlk	21920	1	0	1	1.19e-07	4.35e-06	down	-2.41881	Promoter (<=1kb)	2	4546691	4565281	18591	1	FBgn0046692	FBtr0111111	918
tim	chr2L	3507220	3507222	3	*	tim	2616	1	0	1	3.69e-07	8.08e-06	down	-2.41872	Promoter (<=1kb)	1	3501048	3507218	6171	2	FBgn0014396	FBtr0333254	-2
lncRNA:CR44120	chr2L	8205563	8205565	3	*	lncRNA:CR44120	6482	1	0	1	1.65e-07	5.18e-06	down	-2.41846	Promoter (<=1kb)	1	8205367	8205648	282	2	FBgn0264951	FBtr0335193	83
Gdh	chr3R	23942582	23942852	271	*	Gdh	81334	4	0	4	2.99e-06	2.37e-05	down	-2.41694	Promoter (<=1kb)	4	23935958	23943101	7144	2	FBgn0001098	FBtr0089497	249
Dd	chrX	21323299	21323301	3	*	Dd	103467	1	0	1	1.63e-08	1.53e-06	down	-2.4165	Promoter (<=1kb)	6	21319791	21324009	4219	2	FBgn0029067	FBtr0077226	708
DnaJ-H	chr2L	13166040	13166042	3	*	DnaJ-H	10193	1	0	1	6.22e-07	1.06e-05	down	-2.41503	Promoter (<=1kb)	1	13163312	13166072	2761	2	FBgn0032474	FBtr0080493	30
Sirt1	chr2L	13166040	13166042	3	*	Sirt1	10193	1	0	1	6.22e-07	1.06e-05	down	-2.41503	Promoter (<=1kb)	1	13163312	13166072	2761	2	FBgn0032474	FBtr0080493	30
CG17829	chrX	627782	628033	252	*	CG17829	89250	4	0	4	6.2e-06	3.63e-05	down	-2.41456	Promoter (<=1kb)	6	628338	628894	557	2	FBgn0002579	FBtr0345321	861
OtopLc	chrX	5662035	5662037	3	*	OtopLc	92744	1	0	1	1.42e-07	4.82e-06	down	-2.41449	Promoter (<=1kb)	6	5650567	5662861	12295	2	FBgn0259150	FBtr0331167	824
asRNA:CR44891	chrX	496452	496691	240	*	asRNA:CR44891	89137	3	0	3	9.8e-06	4.75e-05	down	-2.41419	Promoter (<=1kb)	6	496446	509072	12627	1	FBgn0004648	FBtr0290016	6
AANATL7	chrX	2582545	2582553	9	*	AANATL7	90874	2	0	2	3.93e-05	0.000116027	down	-2.41408	Promoter (<=1kb)	6	2582477	2583823	1347	1	FBgn0040376	FBtr0302449	68
Taf12L	chr2L	4701238	4701380	143	*	Taf12L	3659	2	0	2	1.49e-05	6.17e-05	down	-2.41387	Promoter (<=1kb)	1	4700835	4701485	651	2	FBgn0031623	FBtr0077420	105
CG5131	chr2L	17484831	17484833	3	*	CG5131	13321	1	0	1	2.1e-05	7.65e-05	down	-2.41339	Promoter (<=1kb)	1	17484501	17485624	1124	1	FBgn0032644	FBtr0080984	330
Ost48	chrX	9157096	9157098	3	*	Ost48	95139	1	0	1	5.39e-07	9.8e-06	down	-2.41334	Promoter (<=1kb)	6	9153238	9156669	3432	2	FBgn0004828	FBtr0071345	-427
br	chrX	1610636	1610638	3	*	br	89989	1	0	1	1.11e-07	4.18e-06	down	-2.41276	Promoter (<=1kb)	6	1610512	1649378	38867	1	FBgn0283451	FBtr0070261	124
Mur2B	chrX	1610636	1610638	3	*	Mur2B	89989	1	0	1	1.11e-07	4.18e-06	down	-2.41276	Promoter (<=1kb)	6	1610512	1649378	38867	1	FBgn0283451	FBtr0070261	124
Pep	chr3L	17644161	17644163	3	*	Pep	53098	1	0	1	6.33e-07	1.07e-05	down	-2.41264	Promoter (<=1kb)	3	17638103	17645036	6934	2	FBgn0004401	FBtr0075199	873
CG13404	chrX	14266016	14266122	107	*	CG13404	98490	2	0	2	3.44e-05	0.00010616	down	-2.41259	Promoter (<=1kb)	6	14264737	14266250	1514	2	FBgn0030559	FBtr0299543	128
CG34126	chr2L	4981883	4981885	3	*	CG34126	3861	1	0	1	1.02e-07	3.99e-06	down	-2.41227	Promoter (<=1kb)	1	4981614	4992702	11089	1	FBgn0083962	FBtr0329975	269
Fili	chr2R	21883111	21883254	144	*	Fili	36366	2	0	2	9.73e-05	0.000226101	down	-2.41217	Promoter (<=1kb)	2	21883312	21946259	62948	1	FBgn0085397	FBtr0330338	-58
Tk	chr3R	12004939	12004941	3	*	Tk	71566	1	0	1	9.45e-06	4.64e-05	down	-2.41029	Promoter (<=1kb)	4	11994175	12005433	11259	2	FBgn0037976	FBtr0082488	492
CG4239	chrX	16385390	16385392	3	*	CG4239	99973	1	0	1	1.14e-06	1.45e-05	down	-2.40941	Promoter (<=1kb)	6	16385478	16388702	3225	1	FBgn0030745	FBtr0074270	-86
CG13604	chr3R	23991107	23991109	3	*	CG13604	81396	1	0	1	0.024192	0.0251622	down	-2.40929	Promoter (<=1kb)	4	23988806	23991311	2506	2	FBgn0039137	FBtr0113276	202
CG1890	chr3R	31743948	31743950	3	*	CG1890	87470	1	0	1	3.84e-06	2.74e-05	down	-2.40858	Promoter (<=1kb)	4	31744282	31745178	897	1	FBgn0039870	FBtr0085837	-332
CG31785	chr2L	18125620	18125622	3	*	CG31785	13697	1	0	1	0.000144978	0.000307366	down	-2.40818	Promoter (<=1kb)	1	18124098	18125749	1652	2	FBgn0051785	FBtr0300025	127
CG5758	chr2L	18125620	18125622	3	*	CG5758	13697	1	0	1	0.000144978	0.000307366	down	-2.40818	Promoter (<=1kb)	1	18124098	18125749	1652	2	FBgn0051785	FBtr0300025	127
CG11168	chr3R	24918550	24918552	3	*	CG11168	82219	1	0	1	4.69e-06	3.08e-05	down	-2.40719	Promoter (<=1kb)	4	24918498	24922385	3888	1	FBgn0039249	FBtr0337010	52
CG12321	chr3R	18188467	18188469	3	*	CG12321	76529	1	0	1	3.83e-07	8.22e-06	down	-2.40677	Promoter (<=1kb)	4	18187805	18188707	903	2	FBgn0038577	FBtr0083616	238
tal-1A	chr3R	13812926	13813140	215	*	tal-1A	72944	3	0	3	0.000526566	0.000871866	down	-2.40657	Promoter (<=1kb)	4	13813109	13814648	1540	1	FBgn0259730	FBtr0299997	0
tal-2A	chr3R	13812926	13813140	215	*	tal-2A	72944	3	0	3	0.000526566	0.000871866	down	-2.40657	Promoter (<=1kb)	4	13813109	13814648	1540	1	FBgn0259730	FBtr0299997	0
tal-3A	chr3R	13812926	13813140	215	*	tal-3A	72944	3	0	3	0.000526566	0.000871866	down	-2.40657	Promoter (<=1kb)	4	13813109	13814648	1540	1	FBgn0259730	FBtr0299997	0
tal-AA	chr3R	13812926	13813140	215	*	tal-AA	72944	3	0	3	0.000526566	0.000871866	down	-2.40657	Promoter (<=1kb)	4	13813109	13814648	1540	1	FBgn0259730	FBtr0299997	0
Faf2	chr2L	18708571	18708573	3	*	Faf2	14091	1	0	1	1.85e-07	5.54e-06	down	-2.40583	Promoter (<=1kb)	1	18706010	18708599	2590	2	FBgn0025608	FBtr0343115	26
Doa	chr3R	28888831	28888833	3	*	Doa	85011	1	0	1	5.86e-06	3.51e-05	down	-2.40576	Promoter (<=1kb)	4	28889021	28921965	32945	1	FBgn0265998	FBtr0299752	-188
CG1764	chrX	13296330	13296360	31	*	CG1764	97854	2	0	2	5.2e-07	9.64e-06	down	-2.40525	Promoter (<=1kb)	6	13294487	13296651	2165	2	FBgn0030467	FBtr0073796	291
ftz-f1	chr3L	18800472	18800474	3	*	ftz-f1	53925	1	0	1	0.000475281	0.000800842	down	-2.40474	Promoter (<=1kb)	3	18751749	18801309	49561	2	FBgn0001078	FBtr0075086	835
lncRNA:CR45939	chr3L	18800472	18800474	3	*	lncRNA:CR45939	53925	1	0	1	0.000475281	0.000800842	down	-2.40474	Promoter (<=1kb)	3	18751749	18801309	49561	2	FBgn0001078	FBtr0075086	835
Yif1	chr3R	26717968	26718035	68	*	Yif1	83483	2	0	2	1.74e-05	6.81e-05	down	-2.40355	Promoter (<=1kb)	4	26717871	26719806	1936	1	FBgn0039450	FBtr0085039	97
Sugb	chr3L	11684404	11684549	146	*	Sugb	48381	2	0	2	1.79e-06	1.82e-05	down	-2.40336	Promoter (<=1kb)	3	11683980	11690155	6176	1	FBgn0036191	FBtr0344966	424
hiro	chr3L	686193	686195	3	*	hiro	39833	1	0	1	4.38e-05	0.000125606	down	-2.40279	Promoter (<=1kb)	3	682885	685549	2665	2	FBgn0035153	FBtr0072610	-644
dpr19	chr2L	10379631	10379633	3	*	dpr19	8140	1	0	1	2.78e-06	2.28e-05	down	-2.40245	Promoter (<=1kb)	1	10380103	10381828	1726	1	FBgn0032234	FBtr0332193	-470
GstS1	chr2R	17097401	17097403	3	*	GstS1	32650	1	0	1	0.000319078	0.00057792	down	-2.40188	Promoter (<=1kb)	2	17093643	17097436	3794	2	FBgn0010226	FBtr0087005	33
CG30089	chr2R	15728259	15728261	3	*	CG30089	31489	1	0	1	6.92e-06	3.87e-05	down	-2.4015	Promoter (<=1kb)	2	15727381	15761536	34156	1	FBgn0050089	FBtr0087285	878
SCAP	chr2R	6036281	6036283	3	*	SCAP	23530	1	0	1	3.53e-07	7.92e-06	down	-2.40058	Promoter (<=1kb)	2	6026273	6036388	10116	2	FBgn0033052	FBtr0086027	105
asRNA:CR45535	chrX	8085084	8085086	3	*	asRNA:CR45535	94415	1	0	1	6.79e-07	1.11e-05	down	-2.39935	Promoter (<=1kb)	6	8084256	8085765	1510	1	FBgn0267091	FBtr0346106	828
CG2256	chrX	8085084	8085086	3	*	CG2256	94415	1	0	1	6.79e-07	1.11e-05	down	-2.39935	Promoter (<=1kb)	6	8084256	8085765	1510	1	FBgn0267091	FBtr0346106	828
mRpL22	chrX	16783920	16784089	170	*	mRpL22	100310	2	0	2	5.91e-05	0.000155444	down	-2.39932	Promoter (<=1kb)	6	16783933	16785092	1160	1	FBgn0030786	FBtr0074330	0
aos	chr3L	16483371	16483373	3	*	aos	52153	1	0	1	5.61e-06	3.42e-05	down	-2.39892	Promoter (<=1kb)	3	16470386	16483650	13265	2	FBgn0004569	FBtr0075408	277
CG33158	chr3L	16483371	16483373	3	*	CG33158	52153	1	0	1	5.61e-06	3.42e-05	down	-2.39892	Promoter (<=1kb)	3	16470386	16483650	13265	2	FBgn0004569	FBtr0075408	277
Tina-1	chr2R	24942076	24942078	3	*	Tina-1	38985	1	0	1	1.08e-08	1.26e-06	down	-2.39851	Promoter (<=1kb)	2	24940625	24942120	1496	2	FBgn0035083	FBtr0100389	42
tok	chr3R	24720401	24720403	3	*	tok	82012	1	0	1	2.6e-06	2.2e-05	down	-2.39817	Promoter (<=1kb)	4	24720057	24749125	29069	1	FBgn0004885	FBtr0339252	344
Taz	chr2R	12755952	12755978	27	*	Taz	29264	2	0	2	5.25e-07	9.67e-06	down	-2.39813	Promoter (<=1kb)	2	12753026	12756414	3389	2	FBgn0026619	FBtr0087862	436
asRNA:CR45520	chrX	5664816	5665101	286	*	asRNA:CR45520	92746	3	0	3	1.1e-05	5.12e-05	down	-2.39742	Promoter (<=1kb)	6	5664628	5665940	1313	2	FBgn0029783	FBtr0070850	839
Sirt4	chrX	5664816	5665101	286	*	Sirt4	92746	3	0	3	1.1e-05	5.12e-05	down	-2.39742	Promoter (<=1kb)	6	5664628	5665940	1313	2	FBgn0029783	FBtr0070850	839
RpL18	chr3L	7241038	7241040	3	*	RpL18	44881	1	0	1	0.000138194	0.000295995	down	-2.39635	Promoter (<=1kb)	3	7240203	7241257	1055	2	FBgn0035753	FBtr0345036	217
mRpL27	chr2L	4459133	4459135	3	*	mRpL27	3365	1	0	1	3.42e-06	2.56e-05	down	-2.39615	Promoter (<=1kb)	1	4458595	4459602	1008	2	FBgn0053002	FBtr0335135	467
Rpb10	chr3R	24717609	24717611	3	*	Rpb10	82009	1	0	1	2.81e-05	9.26e-05	down	-2.39599	Promoter (<=1kb)	4	24717511	24717998	488	1	FBgn0039218	FBtr0084688	98
CG14257	chr3R	27075924	27075926	3	*	CG14257	83753	1	0	1	1.56e-06	1.69e-05	down	-2.39589	Promoter (<=1kb)	4	27075870	27082818	6949	1	FBgn0039479	FBtr0331702	54
GLS	chr2R	12679013	12679015	3	*	GLS	29212	1	0	1	6.44e-08	3.12e-06	down	-2.39281	Promoter (<=1kb)	2	12670483	12679593	9111	2	FBgn0261625	FBtr0302974	578
Sgs4	chrX	3250656	3250733	78	*	Sgs4	91292	2	0	2	1.6e-05	6.48e-05	down	-2.39271	Promoter (<=1kb)	6	3250089	3251040	952	1	FBgn0003374	FBtr0346736	567
CG30022	chr2R	11388628	11388630	3	*	CG30022	28030	1	0	1	2.22e-06	2.03e-05	down	-2.39239	Promoter (<=1kb)	2	11387160	11388779	1620	2	FBgn0050022	FBtr0289990	149
sprt	chr2R	11388628	11388630	3	*	sprt	28030	1	0	1	2.22e-06	2.03e-05	down	-2.39239	Promoter (<=1kb)	2	11387160	11388779	1620	2	FBgn0050022	FBtr0289990	149
CG4281	chrX	2062484	2062486	3	*	CG4281	90382	1	0	1	1.51e-05	6.22e-05	down	-2.392	Promoter (<=1kb)	6	2055310	2061915	6606	2	FBgn0025625	FBtr0070340	-569
Rgk1	chr2R	19356426	19356428	3	*	Rgk1	34371	1	0	1	8.36e-08	3.61e-06	down	-2.39176	Promoter (<=1kb)	2	19312393	19356525	44133	2	FBgn0264753	FBtr0334283	97
Rpn2	chr3R	29153786	29153788	3	*	Rpn2	85219	1	0	1	3.39e-07	7.75e-06	down	-2.39139	Promoter (<=1kb)	4	29153524	29157255	3732	1	FBgn0028692	FBtr0334532	262
CG5589	chr3L	17804178	17804180	3	*	CG5589	53195	1	0	1	1.55e-05	6.34e-05	down	-2.39123	Promoter (<=1kb)	3	17802490	17804715	2226	2	FBgn0036754	FBtr0075170	535
CG1677	chrX	7291968	7291970	3	*	CG1677	93839	1	0	1	3.05e-08	2.13e-06	down	-2.39106	Promoter (<=1kb)	6	7288680	7291298	2619	2	FBgn0025549	FBtr0071066	-670
CHOp24	chrX	4541051	4541053	3	*	CHOp24	92079	1	0	1	9.13e-06	4.55e-05	down	-2.3896	Promoter (<=1kb)	6	4540908	4542506	1599	1	FBgn0029709	FBtr0343566	143
Lim1	chrX	8805677	8805679	3	*	Lim1	94922	1	0	1	1.42e-06	1.61e-05	down	-2.3889	Promoter (<=1kb)	6	8757260	8805804	48545	2	FBgn0026411	FBtr0071279	125
Scgalpha	chr2L	8303679	8304003	325	*	Scgalpha	6571	4	0	4	2.24e-05	7.98e-05	down	-2.38776	Promoter (<=1kb)	1	8303429	8305376	1948	1	FBgn0032013	FBtr0329935	250
Girdin	chr3L	3179115	3179117	3	*	Girdin	41834	1	0	1	3.8e-06	2.72e-05	down	-2.38671	Promoter (<=1kb)	3	3178930	3185287	6358	1	FBgn0283724	FBtr0332099	185
CG15021	chr3L	4437020	4437022	3	*	CG15021	42899	1	0	1	1.36e-05	5.81e-05	down	-2.38596	Promoter (<=1kb)	3	4436721	4438311	1591	1	FBgn0035544	FBtr0073301	299
Menl-1	chr2R	16418656	16418658	3	*	Menl-1	32112	1	0	1	1.87e-06	1.86e-05	down	-2.38572	Promoter (<=1kb)	2	16414815	16419398	4584	2	FBgn0029153	FBtr0301868	740
Menl-2	chr2R	16418656	16418658	3	*	Menl-2	32112	1	0	1	1.87e-06	1.86e-05	down	-2.38572	Promoter (<=1kb)	2	16414815	16419398	4584	2	FBgn0029153	FBtr0301868	740
Cdc27	chr3L	7249176	7249178	3	*	Cdc27	44891	1	0	1	3.56e-05	0.000108621	down	-2.38434	Promoter (<=1kb)	3	7245481	7249340	3860	2	FBgn0012058	FBtr0333369	162
skd	chr3L	21027220	21027345	126	*	skd	55742	2	0	2	2.93e-05	9.52e-05	down	-2.38422	Promoter (<=1kb)	3	20992814	21027434	34621	2	FBgn0003415	FBtr0078329	89
lncRNA:CR45221	chr3R	16992007	16992009	3	*	lncRNA:CR45221	75611	1	0	1	2.7e-07	6.87e-06	down	-2.38386	Promoter (<=1kb)	4	16991978	16992976	999	1	FBgn0266748	FBtr0345307	29
asRNA:CR44358	chrX	11079437	11079616	180	*	asRNA:CR44358	96403	3	0	3	0.00105798	0.0015661	down	-2.3824	Promoter (<=1kb)	6	11079291	11079772	482	1	FBgn0265458	FBtr0339831	146
PK2-R2	chr3R	13334095	13334097	3	*	PK2-R2	72588	1	0	1	5.7e-08	2.93e-06	down	-2.38175	Promoter (<=1kb)	4	13329070	13334166	5097	2	FBgn0038139	FBtr0082773	69
kek4	chr2L	13212501	13212503	3	*	kek4	10244	1	0	1	1.92e-08	1.66e-06	down	-2.38085	Promoter (<=1kb)	1	13211925	13212116	192	2	FBgn0004191	FBtr0080486	-385
Ppa	chr2R	22687901	22688068	168	*	Ppa	36969	2	1	1	2.25e-05	8e-05	down	-2.37931	Promoter (<=1kb)	2	22684955	22688987	4033	2	FBgn0020257	FBtr0343014	919
RyR	chr2R	8861175	8861177	3	*	RyR	25968	1	0	1	8.88e-06	4.47e-05	down	-2.37823	Promoter (<=1kb)	2	8860399	8888097	27699	1	FBgn0011286	FBtr0304571	776
CG5498	chr3L	20383728	20384050	323	*	CG5498	55148	3	1	2	3.69e-06	2.67e-05	down	-2.37778	Promoter (<=1kb)	3	20382405	20384109	1705	2	FBgn0027565	FBtr0078238	59
CG11597	chr3L	11822187	11822189	3	*	CG11597	48513	1	0	1	9.3e-07	1.3e-05	down	-2.37668	Promoter (<=1kb)	3	11816983	11822205	5223	2	FBgn0036211	FBtr0302136	16
CG5946	chr3L	11822187	11822189	3	*	CG5946	48513	1	0	1	9.3e-07	1.3e-05	down	-2.37668	Promoter (<=1kb)	3	11816983	11822205	5223	2	FBgn0036211	FBtr0302136	16
pyr	chr2R	11712292	11712294	3	*	pyr	28292	1	0	1	1.83e-06	1.84e-05	down	-2.37656	Promoter (<=1kb)	2	11712263	11726345	14083	1	FBgn0033649	FBtr0113070	29
glec	chr3R	21855488	21855536	49	*	glec	79563	2	0	2	2.95e-06	2.36e-05	down	-2.37643	Promoter (<=1kb)	4	21850694	21856266	5573	2	FBgn0015229	FBtr0084157	730
hoe1	chr2L	4928484	4928486	3	*	hoe1	3807	1	0	1	1.01e-06	1.36e-05	down	-2.37622	Promoter (<=1kb)	1	4908742	4928393	19652	2	FBgn0041150	FBtr0336834	-91
SMC3	chrX	16593299	16593301	3	*	SMC3	100134	1	0	1	1.91e-05	7.22e-05	down	-2.37484	Promoter (<=1kb)	6	16588996	16593439	4444	2	FBgn0015615	FBtr0074290	138
CG13148	chr2R	12686539	12686541	3	*	CG13148	29221	1	0	1	6.11e-07	1.05e-05	down	-2.37457	Promoter (<=1kb)	2	12686609	12688786	2178	1	FBgn0033767	FBtr0087847	-68
CG12567	chr2L	23173132	23173134	3	*	CG12567	17700	1	0	1	9.37e-08	3.85e-06	down	-2.37382	Promoter (<=1kb)	1	23173073	23173465	393	1	FBgn0265254	FBtr0339231	59
lncRNA:CR44268	chr2L	23173132	23173134	3	*	lncRNA:CR44268	17700	1	0	1	9.37e-08	3.85e-06	down	-2.37382	Promoter (<=1kb)	1	23173073	23173465	393	1	FBgn0265254	FBtr0339231	59
asRNA:CR44340	chrX	19495587	19495599	13	*	asRNA:CR44340	102221	2	0	2	1.65e-07	5.18e-06	down	-2.37281	Promoter (<=1kb)	6	19495505	19518402	22898	1	FBgn0031023	FBtr0074721	82
Galphao	chr2R	10443916	10443918	3	*	Galphao	27370	1	0	1	3.38e-09	8.12e-07	down	-2.3717	Promoter (<=1kb)	2	10444344	10463718	19375	1	FBgn0001122	FBtr0088266	-426
Vps50	chr2R	17740052	17740054	3	*	Vps50	33163	1	0	1	6.66e-05	0.000169265	down	-2.37152	Promoter (<=1kb)	2	17739901	17743969	4069	1	FBgn0034271	FBtr0086864	151
GatA	chr3R	19027659	19027661	3	*	GatA	77206	1	0	1	5.26e-06	3.28e-05	down	-2.37119	Promoter (<=1kb)	4	19027368	19028015	648	1	FBgn0027785	FBtr0083712	291
NP15.6	chr3R	19027659	19027661	3	*	NP15.6	77206	1	0	1	5.26e-06	3.28e-05	down	-2.37119	Promoter (<=1kb)	4	19027368	19028015	648	1	FBgn0027785	FBtr0083712	291
CG15097	chr2R	18829531	18829533	3	*	CG15097	34002	1	0	1	4.9e-06	3.15e-05	down	-2.37026	Promoter (<=1kb)	2	18822188	18829699	7512	2	FBgn0034396	FBtr0303237	166
Nipsnap	chrX	16072949	16073101	153	*	Nipsnap	99739	2	0	2	1.08e-06	1.41e-05	down	-2.36998	Promoter (<=1kb)	6	16070365	16073282	2918	2	FBgn0030724	FBtr0343595	181
CG1785	chrX	8715132	8715134	3	*	CG1785	94863	1	0	1	0.00015326	0.000321005	down	-2.36955	Promoter (<=1kb)	6	8714936	8717065	2130	1	FBgn0030061	FBtr0071250	196
RpL8	chr3L	2588310	2588312	3	*	RpL8	41462	1	0	1	0.000987785	0.00147737	down	-2.36934	Promoter (<=1kb)	3	2587456	2588883	1428	1	FBgn0261602	FBtr0072925	854
CG15908	chr2R	6668516	6668701	186	*	CG15908	24096	2	1	1	2.12e-05	7.7e-05	down	-2.36923	Promoter (<=1kb)	2	6669024	6670076	1053	1	FBgn0033086	FBtr0086115	-323
hppy	chr2R	19179517	19179666	150	*	hppy	34232	2	0	2	2.3e-05	8.12e-05	down	-2.36873	Promoter (<=1kb)	2	19178738	19227193	48456	1	FBgn0263395	FBtr0340456	779
CG13898	chr3L	803978	803980	3	*	CG13898	39947	1	0	1	6.59e-06	3.76e-05	down	-2.36837	Promoter (<=1kb)	3	803427	804051	625	2	FBgn0035161	FBtr0072599	71
Egfr	chr2R	21523164	21523166	3	*	Egfr	36063	1	0	1	4.38e-06	2.95e-05	down	-2.36802	Promoter (<=1kb)	2	21522420	21559977	37558	1	FBgn0003731	FBtr0071653	744
RpL28	chr3L	3222160	3222162	3	*	RpL28	41892	1	0	1	7.07e-07	1.14e-05	down	-2.36764	Promoter (<=1kb)	3	3222050	3222116	67	2	FBgn0086070	FBtr0114346	-44
CG30069	chr2R	14185239	14185338	100	*	CG30069	30317	2	0	2	0.000104192	0.000238006	down	-2.3671	Promoter (<=1kb)	2	14185204	14198368	13165	1	FBgn0050069	FBtr0087530	35
CG16854	chr2L	11087635	11087637	3	*	CG16854	8699	1	0	1	0.000187444	0.000376497	down	-2.36687	Promoter (<=1kb)	1	11088331	11090680	2350	1	FBgn0032338	FBtr0307171	-694
YME1L	chr2R	22882771	22882773	3	*	YME1L	37160	1	0	1	1.1e-09	6.43e-07	down	-2.36614	Promoter (<=1kb)	2	22881322	22882690	1369	2	FBgn0034791	FBtr0071907	-81
Glut4EF	chr3R	9928563	9928565	3	*	Glut4EF	69926	1	0	1	1.61e-05	6.5e-05	down	-2.36593	Promoter (<=1kb)	4	9928917	9945166	16250	1	FBgn0267336	FBtr0114583	-352
CG44532	chrX	9162161	9162163	3	*	CG44532	95145	1	0	1	1.62e-07	5.16e-06	down	-2.36533	Promoter (<=1kb)	6	9162092	9163153	1062	1	FBgn0265725	FBtr0340668	69
Pis	chrX	15703572	15703660	89	*	Pis	99431	2	0	2	2.4e-05	8.34e-05	down	-2.36503	Promoter (<=1kb)	6	15701451	15703770	2320	2	FBgn0030670	FBtr0074058	110
CG3777	chrX	342767	342769	3	*	CG3777	88958	1	0	1	0.000443352	0.000756562	down	-2.36502	Promoter (<=1kb)	6	343041	350202	7162	1	FBgn0024989	FBtr0070067	-272
kcc	chr2R	23907899	23907901	3	*	kcc	38071	1	0	1	3.16e-07	7.49e-06	down	-2.36442	Promoter (<=1kb)	2	23907654	23925066	17413	1	FBgn0261794	FBtr0343299	245
Shawl	chr2L	9371716	9371916	201	*	Shawl	7362	2	0	2	2.95e-07	7.18e-06	down	-2.36424	Promoter (<=1kb)	1	9372102	9374004	1903	1	FBgn0264447	FBtr0332596	-186
Rab8	chr3L	19870464	19870528	65	*	Rab8	54714	2	0	2	2.68e-06	2.24e-05	down	-2.36335	Promoter (<=1kb)	3	19867488	19871078	3591	2	FBgn0262518	FBtr0074921	550
CG1847	chrX	11869292	11869294	3	*	CG1847	96917	1	0	1	3.8e-06	2.72e-05	down	-2.36332	Promoter (<=1kb)	6	11869170	11871168	1999	1	FBgn0030345	FBtr0330413	122
Rpt5	chr3R	23752947	23753136	190	*	Rpt5	81203	2	0	2	2.82e-05	9.28e-05	down	-2.36143	Promoter (<=1kb)	4	23752876	23754623	1748	1	FBgn0028684	FBtr0084452	71
Abl	chr3L	16646894	16646923	30	*	Abl	52265	2	0	2	4.58e-05	0.000129273	down	-2.36142	Promoter (<=1kb)	3	16615866	16647882	32017	2	FBgn0000017	FBtr0112790	959
CG17202	chr3R	12423020	12423116	97	*	CG17202	71889	2	0	2	0.000569912	0.000931077	down	-2.36111	Promoter (<=1kb)	4	12422768	12423606	839	1	FBgn0038043	FBtr0082587	252
mtDNA-helicase	chr2L	9893162	9893206	45	*	mtDNA-helicase	7761	2	0	2	1.43e-05	6.01e-05	down	-2.36087	Promoter (<=1kb)	1	9891255	9893446	2192	2	FBgn0032154	FBtr0079911	240
hiw	chrX	15063114	15063116	3	*	hiw	98943	1	0	1	3.42e-07	7.78e-06	down	-2.36063	Promoter (<=1kb)	6	15010137	15063429	53293	2	FBgn0030600	FBtr0346087	313
CG9030	chrX	14954259	14954318	60	*	CG9030	98890	2	0	2	9.47e-07	1.32e-05	down	-2.36036	Promoter (<=1kb)	6	14952345	14953697	1353	2	FBgn0266094	FBtr0343516	-562
asRNA:CR45330	chr2L	13244535	13244537	3	*	asRNA:CR45330	10275	1	0	1	3.41e-05	0.000105516	down	-2.35961	Promoter (<=1kb)	1	13244370	13244561	192	2	FBgn0041720	FBtr0091789	24
snRNA:U2:34ABc	chr2L	13244535	13244537	3	*	snRNA:U2:34ABc	10275	1	0	1	3.41e-05	0.000105516	down	-2.35961	Promoter (<=1kb)	1	13244370	13244561	192	2	FBgn0041720	FBtr0091789	24
D	chr3L	14177383	14177516	134	*	D	50365	2	0	2	5.86e-07	1.03e-05	down	-2.35935	Promoter (<=1kb)	3	14175610	14177537	1928	2	FBgn0000411	FBtr0333035	21
SmB	chr2L	10426006	10426291	286	*	SmB	8186	3	0	3	3.97e-05	0.000117016	down	-2.35883	Promoter (<=1kb)	1	10425483	10426627	1145	2	FBgn0262601	FBtr0304118	336
PhKgamma	chrX	11695808	11695897	90	*	PhKgamma	96778	2	0	2	4.39e-06	2.95e-05	down	-2.35866	Promoter (<=1kb)	6	11695137	11704394	9258	1	FBgn0011754	FBtr0343648	671
otk2	chr2R	12024830	12024832	3	*	otk2	28561	1	0	1	4.15e-06	2.86e-05	down	-2.35792	Promoter (<=1kb)	2	12023146	12025272	2127	2	FBgn0267728	FBtr0088027	440
CG14478	chr2R	17458229	17458231	3	*	CG14478	32882	1	0	1	9.66e-09	1.22e-06	down	-2.35788	Promoter (<=1kb)	2	17457663	17465795	8133	1	FBgn0028953	FBtr0345418	566
tum	chr2R	13858453	13858455	3	*	tum	30067	1	0	1	6.52e-07	1.09e-05	down	-2.35724	Promoter (<=1kb)	2	13856150	13858689	2540	2	FBgn0086356	FBtr0087641	234
asRNA:CR45712	chr2L	2007097	2007263	167	*	asRNA:CR45712	1519	2	0	2	8.27e-05	0.00019959	down	-2.35703	Promoter (<=1kb)	1	2006763	2007193	431	2	FBgn0040718	FBtr0077863	0
CG15353	chr2L	2007097	2007263	167	*	CG15353	1519	2	0	2	8.27e-05	0.00019959	down	-2.35703	Promoter (<=1kb)	1	2006763	2007193	431	2	FBgn0040718	FBtr0077863	0
5-HT1A	chr2R	19096400	19096402	3	*	5-HT1A	34179	1	0	1	1.7e-07	5.29e-06	down	-2.35666	Promoter (<=1kb)	2	19094267	19096174	1908	2	FBgn0050125	FBtr0086595	-226
Hsp68	chr3R	24056830	24057033	204	*	Hsp68	81439	3	0	3	1.04e-05	4.93e-05	down	-2.35654	Promoter (<=1kb)	4	24055080	24057310	2231	2	FBgn0001230	FBtr0084589	277
CG9601	chr3R	8343415	8343417	3	*	CG9601	68791	1	0	1	6.85e-06	3.84e-05	down	-2.35652	Promoter (<=1kb)	4	8341661	8343516	1856	2	FBgn0037578	FBtr0081854	99
CG13868	chr2R	20315716	20315718	3	*	CG13868	35137	1	0	1	5.86e-07	1.03e-05	down	-2.35559	Promoter (<=1kb)	2	20315295	20315995	701	1	FBgn0265853	FBtr0342678	421
lncRNA:CR44642	chr2R	20315716	20315718	3	*	lncRNA:CR44642	35137	1	0	1	5.86e-07	1.03e-05	down	-2.35559	Promoter (<=1kb)	2	20315295	20315995	701	1	FBgn0265853	FBtr0342678	421
fkh	chr3R	28584364	28584366	3	*	fkh	84793	1	0	1	7.18e-06	3.95e-05	down	-2.35543	Promoter (<=1kb)	4	28581083	28585112	4030	2	FBgn0000659	FBtr0300259	746
Trf4-1	chrX	8560767	8560769	3	*	Trf4-1	94757	1	0	1	3.44e-07	7.81e-06	down	-2.35458	Promoter (<=1kb)	6	8560895	8567620	6726	1	FBgn0030049	FBtr0071212	-126
Reg-5	chr2R	24792974	24792983	10	*	Reg-5	38855	2	0	2	0.0011393	0.00166841	down	-2.3541	Promoter (<=1kb)	2	24788008	24793410	5403	2	FBgn0015801	FBtr0072427	427
CG5590	chr3R	27677565	27677567	3	*	CG5590	84239	1	0	1	2.62e-07	6.76e-06	down	-2.35351	Promoter (<=1kb)	4	27677522	27679013	1492	1	FBgn0039537	FBtr0085215	43
CG17486	chr2R	4619607	4619822	216	*	CG17486	21984	3	0	3	1.19e-06	1.48e-05	down	-2.35247	Promoter (<=1kb)	2	4619030	4620833	1804	1	FBgn0032997	FBtr0299924	577
gl	chr3R	18372636	18372638	3	*	gl	76668	1	0	1	2.04e-05	7.52e-05	down	-2.3524	Promoter (<=1kb)	4	18367927	18372738	4812	2	FBgn0004618	FBtr0083584	100
CG2540	chrX	12630005	12630007	3	*	CG2540	97390	1	0	1	0.00065254	0.00104348	down	-2.35237	Promoter (<=1kb)	6	12629878	12631111	1234	1	FBgn0030411	FBtr0073675	127
CG2100	chr3R	5735982	5735984	3	*	CG2100	66739	1	0	1	4.32e-06	2.93e-05	down	-2.35189	Promoter (<=1kb)	4	5734698	5736355	1658	2	FBgn0037369	FBtr0301574	371
CG45263	chr3R	8477515	8477591	77	*	CG45263	68856	2	0	2	1.96e-06	1.9e-05	down	-2.35058	Promoter (<=1kb)	4	8364328	8477617	113290	2	FBgn0266801	FBtr0345458	26
Tomosyn	chrX	12652849	12653050	202	*	Tomosyn	97413	3	0	3	2.01e-05	7.45e-05	down	-2.35007	Promoter (<=1kb)	6	12653626	12657275	3650	1	FBgn0015024	FBtr0340408	-576
Plekhm1	chr2R	22103621	22103623	3	*	Plekhm1	36512	1	0	1	0.000174082	0.00035479	down	-2.34971	Promoter (<=1kb)	2	22103177	22105963	2787	1	FBgn0034694	FBtr0071758	444
lace	chr2L	15499169	15499320	152	*	lace	12011	2	0	2	5.14e-07	9.6e-06	down	-2.34954	Promoter (<=1kb)	1	15499127	15505018	5892	1	FBgn0002524	FBtr0080738	42
C1GalTA	chr2L	8943502	8943504	3	*	C1GalTA	7097	1	0	1	1.22e-05	5.43e-05	down	-2.34933	Promoter (<=1kb)	1	8942110	8943257	1148	2	FBgn0032077	FBtr0079791	-245
Ge-1	chr2L	11100750	11100752	3	*	Ge-1	8720	1	0	1	4.53e-05	0.000128404	down	-2.34921	Promoter (<=1kb)	1	11095150	11100888	5739	2	FBgn0283682	FBtr0080232	136
SLO2	chr2R	10396058	10396060	3	*	SLO2	27320	1	0	1	4.28e-07	8.74e-06	down	-2.34855	Promoter (<=1kb)	2	10322904	10395187	72284	2	FBgn0261698	FBtr0303081	-871
lncRNA:CR43644	chr3R	26021050	26021052	3	*	lncRNA:CR43644	83047	1	0	1	1.96e-06	1.9e-05	down	-2.34747	Promoter (<=1kb)	4	26020479	26021076	598	2	FBgn0263653	FBtr0310084	24
CG42245	chr3L	2635896	2636097	202	*	CG42245	41493	3	0	3	2.41e-07	6.41e-06	down	-2.34612	Promoter (<=1kb)	3	2635762	2641984	6223	1	FBgn0035357	FBtr0072934	134
MEP-1	chr3L	2635896	2636097	202	*	MEP-1	41493	3	0	3	2.41e-07	6.41e-06	down	-2.34612	Promoter (<=1kb)	3	2635762	2641984	6223	1	FBgn0035357	FBtr0072934	134
GluRIB	chr3L	9252900	9252902	3	*	GluRIB	46631	1	0	1	1.12e-06	1.44e-05	down	-2.34604	Promoter (<=1kb)	3	9251978	9288522	36545	1	FBgn0264000	FBtr0334765	922
p47	chr2R	7465990	7466131	142	*	p47	24745	2	0	2	6.41e-07	1.08e-05	down	-2.3459	Promoter (<=1kb)	2	7465018	7466759	1742	2	FBgn0033179	FBtr0088997	628
CG13408	chr3R	22080696	22080698	3	*	CG13408	79761	1	0	1	2.65e-05	8.9e-05	down	-2.34297	Promoter (<=1kb)	4	22080382	22083473	3092	1	FBgn0038929	FBtr0084179	314
X11Lbeta	chrX	10629628	10629630	3	*	X11Lbeta	96059	1	0	1	1.27e-07	4.52e-06	down	-2.34265	Promoter (<=1kb)	6	10629317	10710626	81310	1	FBgn0052677	FBtr0071493	311
Usp2	chrX	22456641	22456643	3	*	Usp2	104138	1	0	1	1.85e-06	1.85e-05	down	-2.34234	Promoter (<=1kb)	6	22456446	22468475	12030	1	FBgn0031187	FBtr0077347	195
CG31278	chr3R	10708296	10708298	3	*	CG31278	70526	1	0	1	3.18e-06	2.46e-05	down	-2.34097	Promoter (<=1kb)	4	10707398	10708340	943	2	FBgn0051278	FBtr0082319	42
PK2-R1	chr3R	13338839	13338841	3	*	PK2-R1	72592	1	0	1	6.27e-08	3.07e-06	down	-2.34088	Promoter (<=1kb)	4	13338330	13345106	6777	1	FBgn0038140	FBtr0082745	509
cyr	chrX	8129715	8129717	3	*	cyr	94453	1	0	1	2.58e-06	2.2e-05	down	-2.34053	Promoter (<=1kb)	6	8129812	8131783	1972	1	FBgn0030003	FBtr0071152	-95
RpL10	chr3L	23095417	23095419	3	*	RpL10	57385	1	0	1	2.6e-07	6.73e-06	down	-2.33994	Promoter (<=1kb)	3	23093190	23095471	2282	2	FBgn0024733	FBtr0333910	52
Pten	chr2L	10261004	10261006	3	*	Pten	8049	1	0	1	1.75e-06	1.8e-05	down	-2.33861	Promoter (<=1kb)	1	10256319	10261049	4731	2	FBgn0026379	FBtr0089904	43
Hipk	chr3L	545216	545218	3	*	Hipk	39698	1	0	1	1.46e-08	1.44e-06	down	-2.33796	Promoter (<=1kb)	3	546059	581099	35041	1	FBgn0035142	FBtr0072552	-841
nSMase	chr3L	3220820	3220944	125	*	nSMase	41889	2	0	2	1.4e-05	5.92e-05	down	-2.33712	Promoter (<=1kb)	3	3221350	3221427	78	2	FBgn0086068	FBtr0114344	483
DCP2	chr3L	15826300	15826302	3	*	DCP2	51577	1	0	1	2.72e-05	9.05e-05	down	-2.33592	Promoter (<=1kb)	3	15818734	15826423	7690	2	FBgn0036534	FBtr0304975	121
e(r)	chrX	8905107	8905121	15	*	e(r)	94981	2	0	2	2.36e-05	8.27e-05	down	-2.33553	Promoter (<=1kb)	6	8904359	8905990	1632	2	FBgn0011586	FBtr0310067	869
CG6659	chrX	18657118	18657120	3	*	CG6659	101718	1	0	1	2.22e-06	2.03e-05	down	-2.3355	Promoter (<=1kb)	6	18653392	18657234	3843	2	FBgn0030946	FBtr0074613	114
CG1824	chrX	12595442	12595444	3	*	CG1824	97366	1	0	1	0.000142691	0.000303622	down	-2.33415	Promoter (<=1kb)	6	12592555	12595624	3070	2	FBgn0030403	FBtr0073658	180
SiaT	chr2R	24693913	24693915	3	*	SiaT	38762	1	0	1	5.06e-07	9.52e-06	down	-2.33277	Promoter (<=1kb)	2	24691422	24694386	2965	2	FBgn0035050	FBtr0072441	471
CG30423	chr2R	24875546	24875548	3	*	CG30423	38923	1	0	1	9.05e-07	1.29e-05	down	-2.33192	Promoter (<=1kb)	2	24874976	24875865	890	2	FBgn0050423	FBtr0346609	317
swi2	chr2R	17695020	17695585	566	*	swi2	33119	5	1	4	0.00607637	0.00714796	down	-2.33144	Promoter (<=1kb)	2	17690275	17695353	5079	2	FBgn0034262	FBtr0086889	0
NFAT	chrX	13642191	13642193	3	*	NFAT	98048	1	0	1	1.04e-05	4.92e-05	down	-2.33121	Promoter (<=1kb)	6	13642175	13663657	21483	1	FBgn0030505	FBtr0345127	16
cdc14	chr2L	7810605	7810607	3	*	cdc14	6121	1	0	1	3.92e-09	8.32e-07	down	-2.33006	Promoter (<=1kb)	1	7801668	7810703	9036	2	FBgn0031952	FBtr0343423	96
AANAT1	chr2R	24146193	24146195	3	*	AANAT1	38326	1	0	1	0.00744815	0.00857308	down	-2.32991	Promoter (<=1kb)	2	24146923	24157762	10840	1	FBgn0019643	FBtr0072255	-728
HIP	chrX	3799213	3799215	3	*	HIP	91598	1	0	1	1.13e-06	1.44e-05	down	-2.32811	Promoter (<=1kb)	6	3799150	3801570	2421	1	FBgn0260484	FBtr0070600	63
kin17	chr3L	20356833	20356835	3	*	kin17	55115	1	0	1	0.00833834	0.00948928	down	-2.32796	Promoter (<=1kb)	3	20356807	20358331	1525	1	FBgn0024887	FBtr0078181	26
fwd	chr3L	311284	311286	3	*	fwd	39481	1	0	1	2.63e-09	7.91e-07	down	-2.32748	Promoter (<=1kb)	3	306226	311642	5417	2	FBgn0004373	FBtr0072517	356
CG44837	chr3L	11938115	11938155	41	*	CG44837	48578	2	0	2	0.000252912	0.000478214	down	-2.32719	Promoter (<=1kb)	3	11850645	11938872	88228	2	FBgn0266100	FBtr0343552	717
Rab26	chr3L	21320436	21320438	3	*	Rab26	55960	1	0	1	5.54e-05	0.000148267	down	-2.32676	Promoter (<=1kb)	3	21320007	21334190	14184	1	FBgn0086913	FBtr0112678	429
CG13117	chr2L	9736855	9736857	3	*	CG13117	7647	1	0	1	6.6e-06	3.76e-05	down	-2.32653	Promoter (<=1kb)	1	9736645	9737949	1305	1	FBgn0032140	FBtr0335503	210
sgg	chrX	2637604	2637606	3	*	sgg	90929	1	0	1	1.87e-07	5.58e-06	down	-2.32625	Promoter (<=1kb)	6	2637425	2675621	38197	1	FBgn0003371	FBtr0070470	179
Ten-m	chr3L	22344670	22344672	3	*	Ten-m	56835	1	0	1	6.86e-08	3.23e-06	down	-2.32397	Promoter (<=1kb)	3	22345383	22346236	854	1	FBgn0267625	FBtr0347075	-711
VhaM9.7-b	chr3L	21539920	21539973	54	*	VhaM9.7-b	56153	2	0	2	6.98e-09	1.08e-06	down	-2.32377	Promoter (<=1kb)	3	21539862	21541215	1354	1	FBgn0028663	FBtr0333454	58
mRpS25	chrX	14582977	14582979	3	*	mRpS25	98653	1	0	1	9.27e-06	4.59e-05	down	-2.32374	Promoter (<=1kb)	6	14582136	14582982	847	2	FBgn0030572	FBtr0073945	3
CG9588	chr3R	13675509	13675673	165	*	CG9588	72807	2	0	2	4.15e-07	8.57e-06	down	-2.32241	Promoter (<=1kb)	4	13676549	13679430	2882	1	FBgn0038167	FBtr0082812	-876
CCT7	chr3R	8805879	8805920	42	*	CCT7	69086	2	0	2	2.04e-06	1.94e-05	down	-2.32221	Promoter (<=1kb)	4	8803471	8805802	2332	2	FBgn0037633	FBtr0334332	-77
COX7AL	chr3R	8343850	8343852	3	*	COX7AL	68792	1	0	1	7.12e-06	3.93e-05	down	-2.32185	Promoter (<=1kb)	4	8343669	8344310	642	1	FBgn0037579	FBtr0081839	181
mgl	chrX	9499860	9500059	200	*	mgl	95387	2	0	2	1.31e-06	1.55e-05	down	-2.32148	Promoter (<=1kb)	6	9358496	9500129	141634	2	FBgn0261260	FBtr0343369	70
CG34008	chr3R	20580809	20580811	3	*	CG34008	78435	1	0	1	1.01e-05	4.85e-05	down	-2.31993	Promoter (<=1kb)	4	20580115	20580764	650	1	FBgn0038808	FBtr0273271	694
siz	chr3L	21058955	21058957	3	*	siz	55767	1	0	1	1.24e-05	5.49e-05	down	-2.31874	Promoter (<=1kb)	3	21058832	21075444	16613	1	FBgn0026179	FBtr0078290	123
asRNA:CR44069	chr2R	9610473	9610626	154	*	asRNA:CR44069	26646	2	0	2	6.31e-06	3.67e-05	down	-2.31828	Promoter (<=1kb)	2	9610464	9615617	5154	1	FBgn0264878	FBtr0334806	9
CG14434	chrX	6852543	6852585	43	*	CG14434	93596	2	0	2	0.000288602	0.000532695	down	-2.31802	Promoter (<=1kb)	6	6851909	6852638	730	2	FBgn0029915	FBtr0071040	53
HemK2	chr2L	2758802	2759125	324	*	HemK2	2040	4	0	4	8.88e-08	3.76e-06	down	-2.317	Promoter (<=1kb)	1	2758427	2759677	1251	2	FBgn0031454	FBtr0100383	552
Snapin	chr2L	2758802	2759125	324	*	Snapin	2040	4	0	4	8.88e-08	3.76e-06	down	-2.317	Promoter (<=1kb)	1	2758427	2759677	1251	2	FBgn0031454	FBtr0100383	552
Vps29	chr2L	1151106	1151108	3	*	Vps29	966	1	0	1	9.19e-06	4.57e-05	down	-2.31673	Promoter (<=1kb)	1	1150766	1151764	999	1	FBgn0031310	FBtr0077960	340
CG9662	chr2L	3376615	3376617	3	*	CG9662	2528	1	0	1	1.83e-05	7.04e-05	down	-2.31648	Promoter (<=1kb)	1	3375832	3376737	906	2	FBgn0031529	FBtr0332407	120
RpL36A	chr2L	8042707	8042709	3	*	RpL36A	6305	1	0	1	0.00100381	0.00149754	down	-2.31644	Promoter (<=1kb)	1	8041880	8042859	980	2	FBgn0031980	FBtr0079546	150
Mmp1	chr2R	24685485	24685531	47	*	Mmp1	38756	2	1	1	0.000756168	0.00118008	down	-2.31622	Promoter (<=1kb)	2	24674676	24685090	10415	2	FBgn0035049	FBtr0304006	-395
eEF1alpha2	chr3R	31740362	31740430	69	*	eEF1alpha2	87465	2	0	2	3.15e-07	7.49e-06	down	-2.31622	Promoter (<=1kb)	4	31739660	31743306	3647	1	FBgn0000557	FBtr0085834	702
zfh1	chr3R	30766031	30766033	3	*	zfh1	86596	1	0	1	1.82e-07	5.49e-06	down	-2.31503	Promoter (<=1kb)	4	30765926	30789202	23277	1	FBgn0004606	FBtr0331180	105
Ddx1	chr3L	22263695	22263697	3	*	Ddx1	56763	1	0	1	7.41e-06	4.02e-05	down	-2.3141	Promoter (<=1kb)	3	22263369	22266017	2649	1	FBgn0015075	FBtr0078492	326
Act42A	chr2R	6014861	6014863	3	*	Act42A	23499	1	0	1	8.27e-06	4.29e-05	down	-2.31402	Promoter (<=1kb)	2	6013910	6015689	1780	2	FBgn0000043	FBtr0086029	826
Plap	chr2L	1169916	1169918	3	*	Plap	982	1	0	1	4.44e-06	2.97e-05	down	-2.31296	Promoter (<=1kb)	1	1167172	1169942	2771	2	FBgn0024314	FBtr0304710	24
eas	chrX	16279552	16279622	71	*	eas	99883	2	0	2	2.01e-06	1.93e-05	down	-2.31235	Promoter (<=1kb)	6	16278579	16285618	7040	1	FBgn0000536	FBtr0074214	973
lncRNA:CR45478	chrX	2010131	2010133	3	*	lncRNA:CR45478	90321	1	0	1	3.93e-06	2.77e-05	down	-2.31234	Promoter (<=1kb)	6	2010300	2010417	118	1	FBgn0262297	FBtr0304438	-167
CG5021	chr3L	8967236	8967238	3	*	CG5021	46361	1	0	1	0.0164762	0.0176171	down	-2.31228	Promoter (<=1kb)	3	8966829	8968171	1343	1	FBgn0035944	FBtr0301139	407
mtgo	chr2L	16560982	16560984	3	*	mtgo	12694	1	0	1	5.65e-07	1.01e-05	down	-2.31169	Promoter (<=1kb)	1	16561050	16561197	148	2	FBgn0286734	FBtr0474089	213
CG10116	chr3L	13456247	13456249	3	*	CG10116	49892	1	0	1	1.55e-07	5.05e-06	down	-2.31145	Promoter (<=1kb)	3	13456208	13457238	1031	2	FBgn0036367	FBtr0075824	989
CG10738	chr3L	13456247	13456249	3	*	CG10738	49892	1	0	1	1.55e-07	5.05e-06	down	-2.31145	Promoter (<=1kb)	3	13456208	13457238	1031	2	FBgn0036367	FBtr0075824	989
mr	chr2R	23972649	23972651	3	*	mr	38136	1	0	1	2.93e-07	7.15e-06	down	-2.31022	Promoter (<=1kb)	2	23972431	23975408	2978	1	FBgn0002791	FBtr0072156	218
Cyp49a1	chr2R	10457865	10457867	3	*	Cyp49a1	27382	1	0	1	1.72e-08	1.58e-06	down	-2.31009	Promoter (<=1kb)	2	10449350	10458232	8883	2	FBgn0033524	FBtr0088313	365
asRNA:CR44982	chr2L	2375452	2375568	117	*	asRNA:CR44982	1777	2	0	2	9.12e-07	1.29e-05	down	-2.30969	Promoter (<=1kb)	1	2374955	2375582	628	2	FBgn0266317	FBtr0344047	14
CG15390	chr2L	2375452	2375568	117	*	CG15390	1777	2	0	2	9.12e-07	1.29e-05	down	-2.30969	Promoter (<=1kb)	1	2374955	2375582	628	2	FBgn0266317	FBtr0344047	14
btd	chrX	9694627	9694629	3	*	btd	95510	1	0	1	5.12e-06	3.23e-05	down	-2.3082	Promoter (<=1kb)	6	9694186	9697558	3373	1	FBgn0000233	FBtr0071379	441
Usp15-31	chr2R	24743882	24743884	3	*	Usp15-31	38802	1	0	1	2.61e-08	1.96e-06	down	-2.30619	Promoter (<=1kb)	2	24743749	24756976	13228	1	FBgn0050421	FBtr0343494	133
CG1814	chr2R	9578811	9578813	3	*	CG1814	26610	1	0	1	9.88e-09	1.22e-06	down	-2.30606	Promoter (<=1kb)	2	9578905	9579271	367	1	FBgn0267990	FBtr0347588	-92
Not1	chr2R	9578811	9578813	3	*	Not1	26610	1	0	1	9.88e-09	1.22e-06	down	-2.30606	Promoter (<=1kb)	2	9578905	9579271	367	1	FBgn0267990	FBtr0347588	-92
CG15743	chrX	13285940	13286259	320	*	CG15743	97846	3	0	3	0.000547148	0.000900015	down	-2.3047	Promoter (<=1kb)	6	13286016	13287741	1726	1	FBgn0030465	FBtr0073755	0
CG4168	chr2L	15200217	15200294	78	*	CG4168	11684	3	0	3	8.73e-05	0.000208157	down	-2.30446	Promoter (<=1kb)	1	15161882	15200459	38578	2	FBgn0028888	FBtr0343105	165
ths	chr2R	11757653	11757655	3	*	ths	28332	1	0	1	9.66e-08	3.89e-06	down	-2.3044	Promoter (<=1kb)	2	11756817	11814424	57608	1	FBgn0033652	FBtr0304622	836
RasGAP1	chr3L	9854901	9854903	3	*	RasGAP1	47085	1	0	1	2.26e-07	6.18e-06	down	-2.30416	Promoter (<=1kb)	3	9839093	9855285	16193	2	FBgn0004390	FBtr0076368	382
scpr-C	chr3R	11226333	11226335	3	*	scpr-C	70937	1	0	1	1.51e-06	1.67e-05	down	-2.3034	Promoter (<=1kb)	4	11226762	11228227	1466	1	FBgn0037880	FBtr0082352	-427
Pak	chr3R	6352763	6352765	3	*	Pak	67217	1	0	1	2.65e-07	6.82e-06	down	-2.30317	Promoter (<=1kb)	4	6353123	6361614	8492	1	FBgn0267698	FBtr0334542	-358
CG17219	chr2L	3030148	3030150	3	*	CG17219	2257	1	0	1	1.56e-05	6.37e-05	down	-2.30306	Promoter (<=1kb)	1	3030539	3032300	1762	1	FBgn0031495	FBtr0077651	-389
asRNA:CR46263	chr2L	286833	286835	3	*	asRNA:CR46263	213	1	0	1	3.2e-08	2.18e-06	down	-2.30276	Promoter (<=1kb)	1	283662	286531	2870	2	FBgn0031245	FBtr0078135	-302
CTPsyn	chr3L	15099250	15099252	3	*	CTPsyn	50995	1	0	1	2.8e-08	2.02e-06	down	-2.30178	Promoter (<=1kb)	3	15098534	15099502	969	2	FBgn0264704	FBtr0333938	250
lncRNA:CR43973	chr3L	15099250	15099252	3	*	lncRNA:CR43973	50995	1	0	1	2.8e-08	2.02e-06	down	-2.30178	Promoter (<=1kb)	3	15098534	15099502	969	2	FBgn0264704	FBtr0333938	250
CG32544	chrX	18860393	18860395	3	*	CG32544	101840	1	0	1	1.93e-06	1.89e-05	down	-2.3017	Promoter (<=1kb)	6	18860284	18861964	1681	1	FBgn0052544	FBtr0333158	109
bbc	chr2R	13494733	13494735	3	*	bbc	29810	1	0	1	9.75e-05	0.0002264	down	-2.30158	Promoter (<=1kb)	2	13486634	13494862	8229	2	FBgn0033844	FBtr0087699	127
14-3-3zeta	chr2R	10103981	10103983	3	*	14-3-3zeta	27094	1	0	1	2.66e-09	7.91e-07	down	-2.30146	Promoter (<=1kb)	2	10104115	10108474	4360	1	FBgn0004907	FBtr0332917	-132
Rx	chr2R	20917001	20917003	3	*	Rx	35578	1	0	1	0.000958034	0.00144029	down	-2.30132	Promoter (<=1kb)	2	20916753	20937030	20278	1	FBgn0020617	FBtr0342783	248
asRNA:CR45208	chr3R	25662150	25662152	3	*	asRNA:CR45208	82808	1	0	1	2.42e-06	2.12e-05	down	-2.30109	Promoter (<=1kb)	4	25661795	25665640	3846	1	FBgn0261986	FBtr0084898	355
RASSF8	chr3R	25662150	25662152	3	*	RASSF8	82808	1	0	1	2.42e-06	2.12e-05	down	-2.30109	Promoter (<=1kb)	4	25661795	25665640	3846	1	FBgn0261986	FBtr0084898	355
dop	chr3L	15566822	15566824	3	*	dop	51382	1	0	1	8.07e-05	0.000195959	down	-2.30101	Promoter (<=1kb)	3	15566013	15576313	10301	1	FBgn0267390	FBtr0332091	809
lncRNA:CR44073	chr2L	1839878	1839880	3	*	lncRNA:CR44073	1406	1	0	1	1.37e-07	4.72e-06	down	-2.29978	Promoter (<=1kb)	1	1839494	1839896	403	2	FBgn0264882	FBtr0334828	16
wry	chr2L	1839878	1839880	3	*	wry	1406	1	0	1	1.37e-07	4.72e-06	down	-2.29978	Promoter (<=1kb)	1	1839494	1839896	403	2	FBgn0264882	FBtr0334828	16
CaMKII	chr4	1051229	1051231	3	*	CaMKII	88576	1	0	1	3.02e-07	7.29e-06	down	-2.29882	Promoter (<=1kb)	5	1035288	1051378	16091	2	FBgn0264607	FBtr0089218	147
Rbp	chr3R	15374809	15374811	3	*	Rbp	74165	1	0	1	1.81e-08	1.62e-06	down	-2.29804	Promoter (<=1kb)	4	15374635	15402543	27909	1	FBgn0262483	FBtr0433495	174
Mybbp1A	chrX	629865	629867	3	*	Mybbp1A	89253	1	0	1	4.56e-07	8.98e-06	down	-2.29764	Promoter (<=1kb)	6	629773	633633	3861	1	FBgn0001341	FBtr0070119	92
Map205	chr3R	32067638	32067640	3	*	Map205	87714	1	0	1	2.31e-05	8.16e-05	down	-2.29733	Promoter (<=1kb)	4	32055279	32068441	13163	2	FBgn0002645	FBtr0334299	801
CG11367	chr3L	22728537	22728573	37	*	CG11367	57072	2	0	2	9.45e-06	4.64e-05	down	-2.2973	Promoter (<=1kb)	3	22728111	22733446	5336	1	FBgn0037185	FBtr0078528	426
KdelR	chr2L	10427165	10427167	3	*	KdelR	8187	1	0	1	7.53e-06	4.06e-05	down	-2.29719	Promoter (<=1kb)	1	10426887	10428632	1746	1	FBgn0267330	FBtr0080023	278
egr	chr2R	10078431	10078433	3	*	egr	27065	1	0	1	2.18e-07	6.06e-06	down	-2.29641	Promoter (<=1kb)	2	10078366	10084210	5845	1	FBgn0033483	FBtr0088406	65
tnc	chr3R	24985313	24985315	3	*	tnc	82278	1	0	1	0.0047257	0.00571602	down	-2.29577	Promoter (<=1kb)	4	24985591	25022867	37277	1	FBgn0039257	FBtr0305667	-276
alpha-Man-IIb	chr3R	15811506	15811508	3	*	alpha-Man-IIb	74527	1	0	1	1.12e-07	4.19e-06	down	-2.29519	Promoter (<=1kb)	4	15811648	15811908	261	2	FBgn0266738	FBtr0345239	400
IntS4	chrX	8558178	8558297	120	*	IntS4	94754	2	0	2	6.31e-05	0.000162944	down	-2.29441	Promoter (<=1kb)	6	8555239	8558781	3543	2	FBgn0026679	FBtr0071234	484
Plzf	chr2L	12046814	12046816	3	*	Plzf	9471	1	0	1	5.64e-07	1.01e-05	down	-2.29317	Promoter (<=1kb)	1	12046442	12046679	238	1	FBgn0265800	FBtr0342593	372
MSBP	chrX	15889157	15889218	62	*	MSBP	99605	2	0	2	1.02e-05	4.85e-05	down	-2.29292	Promoter (<=1kb)	6	15887567	15890109	2543	2	FBgn0030703	FBtr0074166	891
CrzR	chr3L	12350914	12350916	3	*	CrzR	48970	1	0	1	2.82e-08	2.03e-06	down	-2.29244	Promoter (<=1kb)	3	12339116	12351544	12429	2	FBgn0036278	FBtr0075989	628
CG10960	chr3L	12832808	12832810	3	*	CG10960	49418	1	0	1	1.58e-08	1.52e-06	down	-2.29236	Promoter (<=1kb)	3	12824880	12832551	7672	2	FBgn0036316	FBtr0075942	-257
CG32521	chrX	21230492	21230494	3	*	CG32521	103402	1	0	1	3.61e-08	2.31e-06	down	-2.29228	Promoter (<=1kb)	6	21231325	21231399	75	2	FBgn0052518	FBtr0077238	905
CG32436	chr3L	21346902	21346904	3	*	CG32436	55985	1	0	1	9.51e-08	3.88e-06	down	-2.29145	Promoter (<=1kb)	3	21344768	21347069	2302	2	FBgn0037076	FBtr0078403	165
ebd2	chr3L	21346902	21346904	3	*	ebd2	55985	1	0	1	9.51e-08	3.88e-06	down	-2.29145	Promoter (<=1kb)	3	21344768	21347069	2302	2	FBgn0037076	FBtr0078403	165
AnxB11	chrX	16421332	16421334	3	*	AnxB11	100019	1	0	1	3.65e-08	2.33e-06	down	-2.29121	Promoter (<=1kb)	6	16416958	16422242	5285	2	FBgn0030749	FBtr0334039	908
CCT2	chrX	9089567	9089569	3	*	CCT2	95077	1	0	1	1.57e-06	1.7e-05	down	-2.29036	Promoter (<=1kb)	6	9089513	9092826	3314	1	FBgn0030086	FBtr0071289	54
CG2931	chr3R	5568415	5568468	54	*	CG2931	66568	2	0	2	8e-06	4.21e-05	down	-2.29006	Promoter (<=1kb)	4	5567502	5568615	1114	2	FBgn0037342	FBtr0078753	147
nvy	chr2R	24276119	24276121	3	*	nvy	38413	1	0	1	3.56e-09	8.16e-07	down	-2.28977	Promoter (<=1kb)	2	24275734	24291084	15351	1	FBgn0005636	FBtr0330612	385
axo	chr3L	4635294	4635424	131	*	axo	43048	2	0	2	6.59e-06	3.76e-05	down	-2.28916	Promoter (<=1kb)	3	4634436	4634789	354	2	FBgn0035563	FBtr0073319	-505
Atg5	chrX	7323604	7323643	40	*	Atg5	93872	2	0	2	7.95e-05	0.000193735	down	-2.28837	Promoter (<=1kb)	6	7314622	7323770	9149	2	FBgn0029943	FBtr0071065	127
S6KL	chrX	18789556	18789592	37	*	S6KL	101804	3	0	3	4.38e-06	2.95e-05	down	-2.28783	Promoter (<=1kb)	6	18790162	18806057	15896	1	FBgn0283473	FBtr0307198	-570
euc	chr3R	18978720	18978759	40	*	euc	77178	2	0	2	0.00018148	0.000366748	down	-2.28742	Promoter (<=1kb)	4	18978273	18978809	537	2	FBgn0038665	FBtr0083722	50
shv	chr2L	453250	453252	3	*	shv	365	1	0	1	8.26e-06	4.29e-05	down	-2.28678	Promoter (<=1kb)	1	453108	454654	1547	1	FBgn0031256	FBtr0078060	142
Upf3	chr2R	23894645	23894647	3	*	Upf3	38054	1	0	1	7.01e-06	3.9e-05	down	-2.28662	Promoter (<=1kb)	2	23893066	23894849	1784	2	FBgn0034923	FBtr0343302	202
Pp1alpha-96A	chr3R	24518373	24518375	3	*	Pp1alpha-96A	81841	1	0	1	4.94e-06	3.16e-05	down	-2.28552	Promoter (<=1kb)	4	24518270	24522331	4062	1	FBgn0003134	FBtr0334334	103
CG11791	chr3R	25050162	25050164	3	*	CG11791	82327	1	0	1	1.89e-05	7.18e-05	down	-2.28551	Promoter (<=1kb)	4	25050243	25053074	2832	1	FBgn0039266	FBtr0084763	-79
CG31373	chr3R	10708610	10708785	176	*	CG31373	70527	2	1	1	1.45e-05	6.07e-05	down	-2.28458	Promoter (<=1kb)	4	10707398	10708340	943	2	FBgn0051278	FBtr0344138	-270
numb	chr2L	9438329	9438428	100	*	numb	7398	2	0	2	9.07e-07	1.29e-05	down	-2.28421	Promoter (<=1kb)	1	9437469	9463123	25655	1	FBgn0002973	FBtr0079821	860
da	chr2L	10388127	10388129	3	*	da	8151	1	0	1	1.23e-07	4.43e-06	down	-2.28375	Promoter (<=1kb)	1	10388105	10393228	5124	1	FBgn0267821	FBtr0332195	22
CG4045	chrX	2075791	2075793	3	*	CG4045	90393	1	0	1	1.59e-05	6.45e-05	down	-2.28361	Promoter (<=1kb)	6	2074795	2075900	1106	2	FBgn0025629	FBtr0070331	107
cerv	chrX	15577946	15577948	3	*	cerv	99308	1	0	1	8.45e-06	4.34e-05	down	-2.28233	Promoter (<=1kb)	6	15576986	15577998	1013	2	FBgn0030657	FBtr0089702	50
COX8	chr3L	21539189	21539191	3	*	COX8	56152	1	0	1	1.17e-08	1.3e-06	down	-2.28175	Promoter (<=1kb)	3	21538859	21539447	589	2	FBgn0263911	FBtr0333464	256
RpL15	chr3L	27267330	27267332	3	*	RpL15	61365	1	0	1	2.42e-07	6.43e-06	down	-2.28131	Promoter (<=1kb)	3	27267383	27267450	68	1	FBgn0286758	FBtr0474123	-51
CG12863	chr2R	14621187	14621189	3	*	CG12863	30637	1	0	1	1.41e-06	1.61e-05	down	-2.28115	Promoter (<=1kb)	2	14619798	14621320	1523	2	FBgn0033948	FBtr0087500	131
UBL3	chrX	15849858	15849860	3	*	UBL3	99570	1	0	1	1.71e-05	6.74e-05	down	-2.28111	Promoter (<=1kb)	6	15847859	15849258	1400	2	FBgn0014391	FBtr0074177	-600
CG15739	chrX	11873461	11873463	3	*	CG15739	96921	1	0	1	1.22e-06	1.5e-05	down	-2.28038	Promoter (<=1kb)	6	11873441	11875346	1906	1	FBgn0030347	FBtr0331588	20
CG13609	chr3R	24228236	24228238	3	*	CG13609	81590	1	0	1	6.32e-05	0.000163156	down	-2.2793	Promoter (<=1kb)	4	24228975	24229279	305	1	FBgn0002863	FBtr0084561	-737
CG13001	chrX	16942588	16942754	167	*	CG13001	100432	3	0	3	2.65e-06	2.23e-05	down	-2.27741	Promoter (<=1kb)	6	16941086	16942871	1786	2	FBgn0030806	FBtr0074417	117
CR14798	chrX	1693220	1693222	3	*	CR14798	90091	1	0	1	0.000158517	0.000329689	down	-2.27648	Promoter (<=1kb)	6	1692824	1693843	1020	1	FBgn0029588	FBtr0475147	396
mRpL19	chr3R	8674453	8674515	63	*	mRpL19	68977	2	0	2	0.00194475	0.00263268	down	-2.27632	Promoter (<=1kb)	4	8674109	8675196	1088	1	FBgn0037608	FBtr0081901	344
rho-7	chr2R	11988680	11988682	3	*	rho-7	28531	1	0	1	4.75e-05	0.000132729	down	-2.27625	Promoter (<=1kb)	2	11986513	11988787	2275	2	FBgn0033672	FBtr0339555	105
Lkb1	chr3R	13676798	13676800	3	*	Lkb1	72809	1	0	1	5.64e-06	3.43e-05	down	-2.27511	Promoter (<=1kb)	4	13676689	13679430	2742	1	FBgn0038167	FBtr0301488	109
CG32450	chr3L	22329996	22330062	67	*	CG32450	56822	2	0	2	1.59e-06	1.72e-05	down	-2.27477	Promoter (<=1kb)	3	22329778	22330657	880	1	FBgn0052450	FBtr0078501	218
CG10512	chr3L	21203117	21203119	3	*	CG10512	55866	1	0	1	0.000565867	0.00092541	down	-2.27429	Promoter (<=1kb)	3	21198261	21203232	4972	2	FBgn0053056	FBtr0078311	113
CG33056	chr3L	21203117	21203119	3	*	CG33056	55866	1	0	1	0.000565867	0.00092541	down	-2.27429	Promoter (<=1kb)	3	21198261	21203232	4972	2	FBgn0053056	FBtr0078311	113
lncRNA:CR44111	chrX	8920037	8920039	3	*	lncRNA:CR44111	94987	1	0	1	3.05e-06	2.4e-05	down	-2.27402	Promoter (<=1kb)	6	8919640	8920467	828	2	FBgn0264942	FBtr0335124	428
rdgA	chrX	8920037	8920039	3	*	rdgA	94987	1	0	1	3.05e-06	2.4e-05	down	-2.27402	Promoter (<=1kb)	6	8919640	8920467	828	2	FBgn0264942	FBtr0335124	428
lncRNA:CR44886	chrX	3334181	3334183	3	*	lncRNA:CR44886	91339	1	0	1	3.53e-05	0.000108014	down	-2.27316	Promoter (<=1kb)	6	3333870	3339327	5458	1	FBgn0000479	FBtr0070522	311
CG14817	chrX	1877123	1877125	3	*	CG14817	90233	1	0	1	0.000114317	0.000255589	down	-2.27097	Promoter (<=1kb)	6	1876294	1877270	977	2	FBgn0026089	FBtr0345510	145
oaf	chr2L	2493024	2493035	12	*	oaf	1892	2	0	2	6.34e-05	0.00016359	down	-2.27042	Promoter (<=1kb)	1	2492955	2498846	5892	1	FBgn0011818	FBtr0077780	69
CG11377	chr2L	102687	102834	148	*	CG11377	89	2	1	1	1.21e-05	5.43e-05	down	-2.27041	Promoter (<=1kb)	1	102380	104142	1763	1	FBgn0031217	FBtr0330636	307
tup	chr2L	18881042	18881083	42	*	tup	14285	2	0	2	1.32e-05	5.71e-05	down	-2.27026	Promoter (<=1kb)	1	18859507	18881261	21755	2	FBgn0003896	FBtr0081111	178
ATP8A	chr2R	13438877	13438879	3	*	ATP8A	29764	1	0	1	7.56e-08	3.41e-06	down	-2.27023	Promoter (<=1kb)	2	13414978	13439051	24074	2	FBgn0259221	FBtr0299754	172
CG42534	chr3R	27341572	27341574	3	*	CG42534	84032	1	0	1	3.66e-07	8.05e-06	down	-2.27002	Promoter (<=1kb)	4	27340622	27371349	30728	1	FBgn0260487	FBtr0300898	950
Hlc	chrX	21387580	21387803	224	*	Hlc	103530	3	0	3	0.000309205	0.000563234	down	-2.26914	Promoter (<=1kb)	6	21385518	21387946	2429	2	FBgn0001565	FBtr0077221	143
CG5854	chr3R	23934306	23934308	3	*	CG5854	81330	1	0	1	1.18e-06	1.47e-05	down	-2.26892	Promoter (<=1kb)	4	23933912	23935964	2053	1	FBgn0039130	FBtr0084494	394
lncRNA:CR43803	chr2L	15960985	15960987	3	*	lncRNA:CR43803	12291	1	0	1	9.55e-06	4.67e-05	down	-2.26823	Promoter (<=1kb)	1	15960243	15961190	948	1	FBgn0264347	FBtr0332014	742
CG8861	chr3R	9328272	9328274	3	*	CG8861	69424	1	0	1	6.74e-07	1.11e-05	down	-2.26774	Promoter (<=1kb)	4	9293642	9328511	34870	2	FBgn0037676	FBtr0301210	237
Usp39	chrX	18859954	18860116	163	*	Usp39	101839	2	0	2	1.23e-06	1.5e-05	down	-2.26741	Promoter (<=1kb)	6	18860284	18861964	1681	1	FBgn0052544	FBtr0074644	-168
CG4678	chrX	16696668	16696670	3	*	CG4678	100232	1	0	1	2.41e-05	8.37e-05	down	-2.2664	Promoter (<=1kb)	6	16696131	16711145	15015	1	FBgn0030778	FBtr0339829	537
Srp14	chr3R	20580270	20580272	3	*	Srp14	78434	1	0	1	1.07e-05	5.03e-05	down	-2.26635	Promoter (<=1kb)	4	20580115	20580764	650	1	FBgn0038808	FBtr0273271	155
CG9674	chr3L	16805318	16805320	3	*	CG9674	52426	1	0	1	1.46e-06	1.64e-05	down	-2.26633	Promoter (<=1kb)	3	16804994	16819532	14539	1	FBgn0021768	FBtr0305912	324
nudC	chr3L	16805318	16805320	3	*	nudC	52426	1	0	1	1.46e-06	1.64e-05	down	-2.26633	Promoter (<=1kb)	3	16804994	16819532	14539	1	FBgn0021768	FBtr0305912	324
red	chr3R	14297772	14297774	3	*	red	73328	1	0	1	2.03e-05	7.49e-05	down	-2.26605	Promoter (<=1kb)	4	14298225	14302276	4052	1	FBgn0285913	FBtr0082923	-451
lncRNA:CR45684	chr2L	13458329	13458331	3	*	lncRNA:CR45684	10444	1	0	1	0.00428472	0.00524399	down	-2.26419	Promoter (<=1kb)	1	13458290	13458605	316	2	FBgn0267244	FBtr0346425	274
lncRNA:CR45362	chr2L	21890964	21890966	3	*	lncRNA:CR45362	16468	1	0	1	7.11e-08	3.3e-06	down	-2.26398	Promoter (<=1kb)	1	21889758	21891095	1338	2	FBgn0266902	FBtr0345769	129
CG11191	chr2R	8001646	8001648	3	*	CG11191	25221	1	0	1	2.37e-06	2.1e-05	down	-2.26391	Promoter (<=1kb)	2	8000490	8002120	1631	2	FBgn0033249	FBtr0339282	472
dome	chrX	19683440	19683442	3	*	dome	102383	1	0	1	3.56e-07	7.95e-06	down	-2.2637	Promoter (<=1kb)	6	19676061	19683518	7458	2	FBgn0043903	FBtr0074756	76
Best2	chr3L	6256477	6256479	3	*	Best2	44206	1	0	1	2.64e-05	8.89e-05	down	-2.26356	Promoter (<=1kb)	3	6245933	6256665	10733	2	FBgn0035696	FBtr0077010	186
Oatp74D	chr3L	17487308	17487310	3	*	Oatp74D	52980	1	0	1	0.000241823	0.000461368	down	-2.26189	Promoter (<=1kb)	3	17487118	17511693	24576	1	FBgn0036732	FBtr0302041	190
CG43175	chr3R	17644113	17644115	3	*	CG43175	76112	1	0	1	2.16e-07	6.02e-06	down	-2.26173	Promoter (<=1kb)	4	17644687	17645259	573	1	FBgn0262794	FBtr0305917	-572
nkd	chr3L	19044614	19044616	3	*	nkd	54107	1	0	1	2.27e-07	6.18e-06	down	-2.26022	Promoter (<=1kb)	3	19003741	19045449	41709	2	FBgn0002945	FBtr0075039	833
CG34351	chr2L	4694946	4694948	3	*	CG34351	3651	1	0	1	3.87e-08	2.42e-06	down	-2.25934	Promoter (<=1kb)	1	4694721	4722465	27745	1	FBgn0085380	FBtr0329978	225
lncRNA:CR44723	chr3L	11324397	11324399	3	*	lncRNA:CR44723	48117	1	0	1	8.5e-07	1.24e-05	down	-2.25885	Promoter (<=1kb)	3	11323356	11323850	495	2	FBgn0265932	FBtr0343037	-547
lncRNA:iab8	chr3R	16849438	16849440	3	*	lncRNA:iab8	75506	1	0	1	1.41e-05	5.95e-05	down	-2.25785	Promoter (<=1kb)	4	16850004	16856191	6188	1	FBgn0020546	FBtr0083363	-564
Atg12	chr3L	12137222	12137224	3	*	Atg12	48829	1	0	1	6.31e-06	3.67e-05	down	-2.2578	Promoter (<=1kb)	3	12136967	12137559	593	1	FBgn0036255	FBtr0300011	255
CG13603	chr3R	23985459	23985614	156	*	CG13603	81390	3	0	3	0.000102031	0.000234355	down	-2.25734	Promoter (<=1kb)	4	23985213	23986569	1357	2	FBgn0039135	FBtr0084510	955
Arf79F	chr3L	22870035	22870263	229	*	Arf79F	57159	3	0	3	2.13e-06	1.99e-05	down	-2.25681	Promoter (<=1kb)	3	22869545	22869622	78	2	FBgn0020518	FBtr0078576	-413
snoRNA:Me18S-A28a	chr2R	17703166	17703168	3	*	snoRNA:Me18S-A28a	33125	1	0	1	2.26e-06	2.05e-05	down	-2.25671	Promoter (<=1kb)	2	17703102	17703168	67	1	FBgn0063386	FBtr0086858	64
Uhg1	chr2R	17703166	17703168	3	*	Uhg1	33125	1	0	1	2.26e-06	2.05e-05	down	-2.25671	Promoter (<=1kb)	2	17703102	17703168	67	1	FBgn0063386	FBtr0086858	64
asRNA:CR44690	chrX	2180795	2180797	3	*	asRNA:CR44690	90504	1	0	1	0.000205403	0.000404557	down	-2.25641	Promoter (<=1kb)	6	2175817	2180816	5000	2	FBgn0265901	FBtr0342773	19
Cyp4ae1	chrX	2180795	2180797	3	*	Cyp4ae1	90504	1	0	1	0.000205403	0.000404557	down	-2.25641	Promoter (<=1kb)	6	2175817	2180816	5000	2	FBgn0265901	FBtr0342773	19
CG42797	chrX	9609027	9609029	3	*	CG42797	95455	1	0	1	6.5e-06	3.73e-05	down	-2.25641	Promoter (<=1kb)	6	9608946	9623243	14298	1	FBgn0261931	FBtr0303710	81
Fit1	chr3L	4104296	4104298	3	*	Fit1	42563	1	0	1	2.66e-05	8.93e-05	down	-2.25609	Promoter (<=1kb)	3	4103564	4107116	3553	1	FBgn0035498	FBtr0073210	732
CG10492	chr2L	19054501	19054503	3	*	CG10492	14437	1	0	1	4.95e-06	3.17e-05	down	-2.25586	Promoter (<=1kb)	1	19054078	19058821	4744	1	FBgn0032748	FBtr0081148	423
asRNA:CR44911	chr2L	21179302	21179443	142	*	asRNA:CR44911	15919	2	0	2	1.66e-05	6.62e-05	down	-2.25572	Promoter (<=1kb)	1	21174182	21179683	5502	2	FBgn0000239	FBtr0343875	240
bur	chr2L	21179302	21179443	142	*	bur	15919	2	0	2	1.66e-05	6.62e-05	down	-2.25572	Promoter (<=1kb)	1	21174182	21179683	5502	2	FBgn0000239	FBtr0343875	240
Hsc70-5	chr2R	14255371	14255373	3	*	Hsc70-5	30386	1	0	1	8.25e-07	1.23e-05	down	-2.25548	Promoter (<=1kb)	2	14252598	14256061	3464	2	FBgn0001220	FBtr0339969	688
NK7.1	chr3R	14369205	14369207	3	*	NK7.1	73378	1	0	1	3.16e-06	2.45e-05	down	-2.25518	Promoter (<=1kb)	4	14330140	14369817	39678	2	FBgn0024321	FBtr0082942	610
Spn55B	chr2R	18126586	18126588	3	*	Spn55B	33452	1	0	1	5.38e-05	0.000145061	down	-2.2544	Promoter (<=1kb)	2	18126347	18128210	1864	1	FBgn0028983	FBtr0086733	239
lncRNA:CR44603	chr2L	1623240	1623242	3	*	lncRNA:CR44603	1264	1	0	1	1.37e-07	4.72e-06	down	-2.25423	Promoter (<=1kb)	1	1619412	1623478	4067	2	FBgn0265814	FBtr0342646	236
CG13921	chr3L	1749770	1749916	147	*	CG13921	40753	2	0	2	1.3e-05	5.66e-05	down	-2.25368	Promoter (<=1kb)	3	1748832	1752390	3559	1	FBgn0035267	FBtr0310623	938
CG3625	chr2L	286208	286210	3	*	CG3625	212	1	0	1	1.81e-08	1.62e-06	down	-2.25332	Promoter (<=1kb)	1	286383	288292	1910	1	FBgn0267996	FBtr0347595	-173
RpS20	chr3R	20823177	20823249	73	*	RpS20	78641	2	0	2	6.92e-05	0.000174451	down	-2.25297	Promoter (<=1kb)	4	20822926	20823060	135	1	FBgn0082986	FBtr0113585	251
tinc	chr3R	17812319	17812563	245	*	tinc	76263	3	0	3	2.83e-08	2.03e-06	down	-2.25286	Promoter (<=1kb)	4	17811541	17872507	60967	1	FBgn0261649	FBtr0337039	778
CG11076	chr4	1030097	1030627	531	*	CG11076	88559	6	0	6	6.09e-06	3.59e-05	down	-2.25235	Promoter (<=1kb)	5	1029711	1030975	1265	2	FBgn0039929	FBtr0089221	348
fh	chrX	9148912	9148914	3	*	fh	95128	1	0	1	0.000126774	0.000276836	down	-2.25229	Promoter (<=1kb)	6	9148080	9149071	992	2	FBgn0030092	FBtr0071348	157
BCAS2	chr3R	27922232	27922234	3	*	BCAS2	84385	1	0	1	4.68e-05	0.000131351	down	-2.25123	Promoter (<=1kb)	4	27921283	27922356	1074	2	FBgn0039558	FBtr0085269	122
ems	chr3R	13902248	13902250	3	*	ems	73029	1	0	1	0.000671208	0.00106826	down	-2.25108	Promoter (<=1kb)	4	13901853	13904620	2768	1	FBgn0000576	FBtr0082863	395
SpdS	chr3R	9631764	9631846	83	*	SpdS	69670	2	0	2	1.46e-06	1.64e-05	down	-2.2492	Promoter (<=1kb)	4	9631671	9633187	1517	1	FBgn0037723	FBtr0306007	93
CG18135	chr3L	18992306	18992308	3	*	CG18135	54082	1	0	1	1.92e-05	7.25e-05	down	-2.24892	Promoter (<=1kb)	3	18990026	18992816	2791	2	FBgn0036837	FBtr0332651	508
Scm	chr3R	9637496	9637622	127	*	Scm	69675	2	0	2	2.81e-05	9.25e-05	down	-2.24889	Promoter (<=1kb)	4	9633359	9637611	4253	2	FBgn0003334	FBtr0082102	0
Trh	chr3L	1193173	1193175	3	*	Trh	40218	1	0	1	1.44e-06	1.63e-05	down	-2.2487	Promoter (<=1kb)	3	1190384	1193173	2790	2	FBgn0035187	FBtr0072638	0
CG14441	chrX	6699983	6699985	3	*	CG14441	93481	1	0	1	4.75e-08	2.65e-06	down	-2.24779	Promoter (<=1kb)	6	6699508	6719389	19882	1	FBgn0029895	FBtr0070959	475
Rheb	chr3R	5568983	5568985	3	*	Rheb	66569	1	0	1	3.22e-07	7.56e-06	down	-2.24609	Promoter (<=1kb)	4	5568921	5570491	1571	1	FBgn0041191	FBtr0078694	62
CG13630	chr3R	24717861	24717987	127	*	CG13630	82010	2	0	2	0.000132903	0.000287303	down	-2.24512	Promoter (<=1kb)	4	24717511	24717998	488	1	FBgn0039218	FBtr0084688	350
pbl	chr3L	7910977	7910979	3	*	pbl	45403	1	0	1	6.93e-08	3.25e-06	down	-2.24509	Promoter (<=1kb)	3	7896109	7911954	15846	2	FBgn0003041	FBtr0076771	975
CG12547	chr2R	4788076	4788078	3	*	CG12547	22198	1	0	1	1.26e-06	1.52e-05	down	-2.24508	Promoter (<=1kb)	2	4785855	4788642	2788	2	FBgn0250830	FBtr0329829	564
CG31855	chr2L	13370193	13370195	3	*	CG31855	10386	1	0	1	1.42e-05	5.99e-05	down	-2.24438	Promoter (<=1kb)	1	13370103	13371026	924	2	FBgn0032511	FBtr0080472	831
ND-B22	chr2L	13370193	13370195	3	*	ND-B22	10386	1	0	1	1.42e-05	5.99e-05	down	-2.24438	Promoter (<=1kb)	1	13370103	13371026	924	2	FBgn0032511	FBtr0080472	831
tefu	chr3R	15242205	15242261	57	*	tefu	74059	2	0	2	6.17e-06	3.62e-05	down	-2.24335	Promoter (<=1kb)	4	15232212	15242236	10025	2	FBgn0045035	FBtr0110874	0
5PtaseI	chr3R	25045053	25045055	3	*	5PtaseI	82320	1	0	1	3.13e-05	9.94e-05	down	-2.24293	Promoter (<=1kb)	4	25040427	25045151	4725	2	FBgn0259178	FBtr0299660	96
Nlg3	chr3R	7626403	7626405	3	*	Nlg3	68192	1	0	1	2.08e-05	7.62e-05	down	-2.2428	Promoter (<=1kb)	4	7626882	7627290	409	2	FBgn0265420	FBtr0339727	885
thoc7	chr3L	212507	212569	63	*	thoc7	39380	2	0	2	1.06e-05	4.98e-05	down	-2.24219	Promoter (<=1kb)	3	211636	212687	1052	2	FBgn0035110	FBtr0072526	118
CG14806	chrX	1880765	1880889	125	*	CG14806	90237	2	0	2	2.99e-05	9.66e-05	down	-2.24207	Promoter (<=1kb)	6	1880531	1881432	902	1	FBgn0029594	FBtr0331384	234
CG3534	chr3R	16996570	16996572	3	*	CG3534	75614	1	0	1	8.63e-08	3.7e-06	down	-2.24198	Promoter (<=1kb)	4	16996446	16999449	3004	1	FBgn0038463	FBtr0083370	124
CG17272	chr3R	20823572	20823707	136	*	CG17272	78642	2	0	2	8.56e-06	4.38e-05	down	-2.24187	Promoter (<=1kb)	4	20823313	20824239	927	2	FBgn0038830	FBtr0083992	532
ND-B12	chr2R	21658468	21658470	3	*	ND-B12	36181	1	0	1	1.35e-06	1.57e-05	down	-2.24076	Promoter (<=1kb)	2	21658297	21658777	481	1	FBgn0034645	FBtr0071663	171
Usp10	chr3L	871991	871993	3	*	Usp10	40006	1	0	1	2.96e-06	2.36e-05	down	-2.24053	Promoter (<=1kb)	3	871899	893520	21622	1	FBgn0052479	FBtr0072589	92
lncRNA:CR45659	chr3L	22840379	22840381	3	*	lncRNA:CR45659	57133	1	0	1	1.5e-06	1.67e-05	down	-2.2403	Promoter (<=1kb)	3	22840293	22841302	1010	1	FBgn0267219	FBtr0346388	86
IntS2	chrX	17656740	17656790	51	*	IntS2	100974	2	0	2	2.71e-06	2.25e-05	down	-2.23994	Promoter (<=1kb)	6	17652761	17656818	4058	2	FBgn0030858	FBtr0074480	28
bma	chr3L	9908397	9908399	3	*	bma	47147	1	0	1	2.63e-07	6.78e-06	down	-2.23947	Promoter (<=1kb)	3	9908120	9967298	59179	1	FBgn0085385	FBtr0331579	277
CG6638	chr3L	8575076	8575251	176	*	CG6638	45968	2	0	2	2.23e-06	2.03e-05	down	-2.23929	Promoter (<=1kb)	3	8574407	8576078	1672	2	FBgn0035911	FBtr0076651	827
PRAS40	chr2R	14481587	14481712	126	*	PRAS40	30545	2	0	2	2.49e-08	1.91e-06	down	-2.23875	Promoter (<=1kb)	2	14481187	14497312	16126	1	FBgn0267824	FBtr0347396	400
Lim3	chr2L	19084198	19084200	3	*	Lim3	14480	1	0	1	1.46e-06	1.64e-05	down	-2.23844	Promoter (<=1kb)	1	19079256	19083322	4067	2	FBgn0002023	FBtr0081170	-876
CNT2	chr2R	9079476	9079478	3	*	CNT2	26205	1	0	1	0.000640236	0.00102652	down	-2.23811	Promoter (<=1kb)	2	9078721	9082374	3654	1	FBgn0025709	FBtr0088562	755
Rift	chr3R	31809779	31809806	28	*	Rift	87547	2	0	2	1.94e-05	7.29e-05	down	-2.23804	Promoter (<=1kb)	4	31806867	31810186	3320	2	FBgn0039882	FBtr0085852	380
gce	chrX	15301307	15301309	3	*	gce	99132	1	0	1	1.15e-05	5.24e-05	down	-2.23767	Promoter (<=1kb)	6	15300509	15319074	18566	1	FBgn0261703	FBtr0303199	798
eIF3i	chr2L	4967284	4967286	3	*	eIF3i	3850	1	0	1	2.36e-05	8.27e-05	down	-2.23705	Promoter (<=1kb)	1	4966367	4967775	1409	2	FBgn0015834	FBtr0079053	489
hec	chrX	12956865	12956867	3	*	hec	97608	1	0	1	4.63e-05	0.000130365	down	-2.23684	Promoter (<=1kb)	6	12950436	12957462	7027	2	FBgn0030437	FBtr0073753	595
Lon	chr3L	19611416	19611559	144	*	Lon	54562	2	1	1	1.84e-06	1.84e-05	down	-2.23681	Promoter (<=1kb)	3	19607857	19612199	4343	2	FBgn0036892	FBtr0074967	640
btsz	chr3R	14872943	14872945	3	*	btsz	73805	1	0	1	3.58e-08	2.3e-06	down	-2.23665	Promoter (<=1kb)	4	14804092	14873451	69360	2	FBgn0266756	FBtr0334290	506
CG12640	chrX	10432477	10432479	3	*	CG12640	95933	1	0	1	1.62e-06	1.73e-05	down	-2.23662	Promoter (<=1kb)	6	10432465	10432812	348	2	FBgn0030202	FBtr0071464	333
crc	chr2L	21313208	21313491	284	*	crc	16046	4	0	4	0.00148439	0.00208937	down	-2.23613	Promoter (<=1kb)	1	21314360	21319527	5168	1	FBgn0000370	FBtr0081513	-869
CG3281	chr3R	11962696	11962698	3	*	CG3281	71532	1	0	1	4.63e-06	3.05e-05	down	-2.23588	Promoter (<=1kb)	4	11960883	11962805	1923	2	FBgn0260741	FBtr0082511	107
lov	chr2R	25097358	25097360	3	*	lov	39111	1	0	1	3.13e-05	9.95e-05	down	-2.23584	Promoter (<=1kb)	2	25085780	25098286	12507	2	FBgn0266129	FBtr0072458	926
HipHop	chr3L	18821296	18821298	3	*	HipHop	53944	1	0	1	0.000258596	0.000486895	down	-2.23538	Promoter (<=1kb)	3	18821173	18822353	1181	1	FBgn0036815	FBtr0075056	123
Chmp1	chr3L	18683658	18683660	3	*	Chmp1	53859	1	0	1	1.12e-05	5.18e-05	down	-2.23492	Promoter (<=1kb)	3	18682895	18684061	1167	2	FBgn0036805	FBtr0345383	401
CG2321	chr3R	29488520	29488571	52	*	CG2321	85487	2	0	2	2.87e-05	9.38e-05	down	-2.23476	Promoter (<=1kb)	4	29484783	29489265	4483	2	FBgn0039663	FBtr0334339	694
Rho1	chr2R	16103701	16103703	3	*	Rho1	31814	1	0	1	7.92e-06	4.19e-05	down	-2.23464	Promoter (<=1kb)	2	16103466	16106489	3024	1	FBgn0014020	FBtr0087214	235
Exd2	chr3R	11435255	11435415	161	*	Exd2	71109	3	0	3	8.25e-05	0.000199269	down	-2.23415	Promoter (<=1kb)	4	11433488	11435607	2120	2	FBgn0037901	FBtr0308211	192
rdgB	chrX	13768086	13768088	3	*	rdgB	98153	1	0	1	1.3e-06	1.54e-05	down	-2.23373	Promoter (<=1kb)	6	13767664	13775867	8204	1	FBgn0003218	FBtr0073823	422
CG11486	chr3L	3090021	3090203	183	*	CG11486	41759	2	0	2	1.76e-06	1.81e-05	down	-2.2336	Promoter (<=1kb)	3	3090801	3090923	123	1	FBgn0003938	FBtr0073017	-598
Map60	chr2R	9591137	9591369	233	*	Map60	26626	3	0	3	1.42e-05	5.97e-05	down	-2.23348	Promoter (<=1kb)	2	9590867	9592744	1878	1	FBgn0010342	FBtr0088530	270
CG42374	chr3L	19263875	19263877	3	*	CG42374	54238	1	0	1	0.00216318	0.00288386	down	-2.2334	Promoter (<=1kb)	3	19263766	19266838	3073	1	FBgn0259720	FBtr0344455	109
CG9666	chr3L	19263875	19263877	3	*	CG9666	54238	1	0	1	0.00216318	0.00288386	down	-2.2334	Promoter (<=1kb)	3	19263766	19266838	3073	1	FBgn0259720	FBtr0344455	109
Max	chr3L	19263875	19263877	3	*	Max	54238	1	0	1	0.00216318	0.00288386	down	-2.2334	Promoter (<=1kb)	3	19263766	19266838	3073	1	FBgn0259720	FBtr0344455	109
Arp2	chrX	16553413	16553415	3	*	Arp2	100117	1	0	1	8.66e-08	3.7e-06	down	-2.23337	Promoter (<=1kb)	6	16548290	16553951	5662	2	FBgn0011742	FBtr0112868	536
dve	chr2R	22244516	22244518	3	*	dve	36631	1	0	1	0.000148104	0.000312583	down	-2.23292	Promoter (<=1kb)	2	22243963	22286469	42507	1	FBgn0020307	FBtr0071775	553
CG8149	chr3R	9505557	9505559	3	*	CG8149	69566	1	0	1	0.00056581	0.000925331	down	-2.23285	Promoter (<=1kb)	4	9504656	9505865	1210	1	FBgn0037700	FBtr0082061	901
CG15317	chrX	9555869	9555871	3	*	CG15317	95402	1	0	1	2.55e-06	2.18e-05	down	-2.23201	Promoter (<=1kb)	6	9555607	9556544	938	2	FBgn0030137	FBtr0071371	673
sd	chrX	15811972	15812073	102	*	sd	99547	2	0	2	1.65e-05	6.59e-05	down	-2.23184	Promoter (<=1kb)	6	15812094	15825722	13629	1	FBgn0003345	FBtr0308129	-21
ebi	chr2L	415109	415204	96	*	ebi	329	3	0	3	0.000127499	0.000278121	down	-2.23175	Promoter (<=1kb)	1	415067	418536	3470	1	FBgn0263933	FBtr0078055	42
Gbs-76A	chr3L	19288415	19288417	3	*	Gbs-76A	54274	1	0	1	4.67e-05	0.000131085	down	-2.23163	Promoter (<=1kb)	3	19281928	19288569	6642	2	FBgn0036862	FBtr0075014	152
CG10321	chr2R	21635329	21635410	82	*	CG10321	36159	2	0	2	1.53e-06	1.68e-05	down	-2.23156	Promoter (<=1kb)	2	21634679	21638399	3721	1	FBgn0034643	FBtr0330228	650
Wnk	chr3L	21554714	21554716	3	*	Wnk	56176	1	0	1	1.47e-05	6.13e-05	down	-2.2309	Promoter (<=1kb)	3	21543850	21554928	11079	2	FBgn0037098	FBtr0346818	212
Syn1	chr3L	21756694	21756696	3	*	Syn1	56395	1	0	1	1.05e-07	4.05e-06	down	-2.22995	Promoter (<=1kb)	3	21757157	21758046	890	1	FBgn0037131	FBtr0078435	-461
pyd	chr3R	8846696	8846730	35	*	pyd	69128	2	0	2	2.74e-06	2.27e-05	down	-2.22988	Promoter (<=1kb)	4	8833187	8846289	13103	2	FBgn0262614	FBtr0305294	-407
CG46308	chr2L	13462321	13462323	3	*	CG46308	10447	1	0	1	2.03e-07	5.83e-06	down	-2.22906	Promoter (<=1kb)	1	13461774	13500427	38654	1	FBgn0284224	FBtr0452123	547
Myd88	chr2R	9308663	9308665	3	*	Myd88	26399	1	0	1	0.000551386	0.000905694	down	-2.22899	Promoter (<=1kb)	2	9302823	9308722	5900	2	FBgn0033402	FBtr0333000	57
mir-3645	chrX	5622262	5622375	114	*	mir-3645	92696	2	0	2	4.43e-06	2.97e-05	down	-2.22871	Promoter (<=1kb)	6	5622280	5622416	137	2	FBgn0263631	FBtr0309642	41
Mlc-c	chrX	5622262	5622375	114	*	Mlc-c	92696	2	0	2	4.43e-06	2.97e-05	down	-2.22871	Promoter (<=1kb)	6	5622280	5622416	137	2	FBgn0263631	FBtr0309642	41
CG13623	chr3R	24530552	24530554	3	*	CG13623	81855	1	0	1	0.000111945	0.000251357	down	-2.22836	Promoter (<=1kb)	4	24529773	24530558	786	2	FBgn0039205	FBtr0084679	4
CG10700	chr2L	19078472	19078664	193	*	CG10700	14474	3	0	3	8.81e-06	4.45e-05	down	-2.2275	Promoter (<=1kb)	1	19077276	19079028	1753	2	FBgn0032754	FBtr0081171	364
vn	chr3L	5845244	5845409	166	*	vn	43824	3	0	3	1.29e-06	1.53e-05	down	-2.22562	Promoter (<=1kb)	3	5813338	5845664	32327	2	FBgn0003984	FBtr0300010	255
CG34163	chr2L	11988303	11988376	74	*	CG34163	9403	2	0	2	1.16e-06	1.46e-05	down	-2.22418	Promoter (<=1kb)	1	11988270	11988801	532	1	FBgn0085192	FBtr0310150	33
CG11596	chrX	1927984	1927986	3	*	CG11596	90275	1	0	1	4.86e-06	3.14e-05	down	-2.22411	Promoter (<=1kb)	6	1928172	1930510	2339	1	FBgn0023522	FBtr0070320	-186
CG5056	chr2L	10366901	10366990	90	*	CG5056	8132	2	1	1	0.000944651	0.0014233	down	-2.2241	Promoter (<=1kb)	1	10366692	10367946	1255	1	FBgn0032231	FBtr0080003	209
axed	chr3L	6609672	6609689	18	*	axed	44464	3	0	3	6.56e-06	3.75e-05	down	-2.2237	Promoter (<=1kb)	3	6609577	6618180	8604	1	FBgn0035708	FBtr0076981	95
Actbeta	chr4	1084587	1084589	3	*	Actbeta	88600	1	0	1	1.19e-06	1.48e-05	down	-2.22366	Promoter (<=1kb)	5	1077331	1084796	7466	2	FBgn0024913	FBtr0089209	207
Ubc7	chrX	16594095	16594097	3	*	Ubc7	100136	1	0	1	0.000332417	0.000597462	down	-2.22359	Promoter (<=1kb)	6	16593677	16595867	2191	1	FBgn0267384	FBtr0340157	418
Idgf2	chr2L	16448499	16448501	3	*	Idgf2	12603	1	0	1	0.00672503	0.00782475	down	-2.22341	Promoter (<=1kb)	1	16400175	16448469	48295	2	FBgn0028523	FBtr0080880	-30
Slh	chr2L	2492346	2492348	3	*	Slh	1891	1	0	1	0.000154158	0.000322495	down	-2.22305	Promoter (<=1kb)	1	2488197	2492671	4475	2	FBgn0264978	FBtr0335169	323
Cyp6d5	chr3R	14031323	14031333	11	*	Cyp6d5	73128	2	0	2	0.000705494	0.00111365	down	-2.22298	Promoter (<=1kb)	4	13968625	14032057	63433	2	FBgn0264493	FBtr0301633	724
rst	chrX	2972890	2972979	90	*	rst	91135	2	0	2	1.2e-05	5.38e-05	down	-2.2217	Promoter (<=1kb)	6	2950399	2973834	23436	2	FBgn0003285	FBtr0343758	855
dbo	chr3L	15827438	15827610	173	*	dbo	51578	2	0	2	4.4e-06	2.96e-05	down	-2.22103	Promoter (<=1kb)	3	15826888	15832004	5117	1	FBgn0040230	FBtr0075505	550
CG3107	chr2R	5091389	5091391	3	*	CG3107	22564	1	0	1	3.43e-05	0.000105936	down	-2.22074	Promoter (<=1kb)	2	5091004	5095090	4087	1	FBgn0033005	FBtr0345009	385
heix	chr2L	16299692	16299694	3	*	heix	12496	1	0	1	9.01e-06	4.51e-05	down	-2.22005	Promoter (<=1kb)	1	16296051	16299858	3808	2	FBgn0028375	FBtr0080852	164
CG17362	chr3L	13986630	13986632	3	*	CG17362	50184	1	0	1	0.00476964	0.00576285	down	-2.21931	Promoter (<=1kb)	3	13986620	13987184	565	1	FBgn0036393	FBtr0333024	10
Hmgcr	chr3R	23733418	23733420	3	*	Hmgcr	81179	1	0	1	1.65e-05	6.59e-05	down	-2.21889	Promoter (<=1kb)	4	23731375	23733462	2088	2	FBgn0028691	FBtr0084469	42
ena	chr2R	19155905	19156029	125	*	ena	34212	2	0	2	1.05e-07	4.05e-06	down	-2.2184	Promoter (<=1kb)	2	19155221	19162598	7378	1	FBgn0000578	FBtr0114623	684
asRNA:CR44027	chr4	395813	395815	3	*	asRNA:CR44027	88023	1	0	1	2.26e-09	7.57e-07	down	-2.21814	Promoter (<=1kb)	5	375640	395605	19966	2	FBgn0262636	FBtr0307043	-208
Nrx-1	chr3R	22469509	22469511	3	*	Nrx-1	80045	1	0	1	1.9e-08	1.66e-06	down	-2.21806	Promoter (<=1kb)	4	22469478	22486969	17492	1	FBgn0038975	FBtr0345228	31
tay	chrX	15887167	15887169	3	*	tay	99602	1	0	1	0.000738527	0.00115702	down	-2.21804	Promoter (<=1kb)	6	15876368	15887311	10944	2	FBgn0260938	FBtr0310065	142
mRpL52	chr2R	7674284	7674286	3	*	mRpL52	24941	1	0	1	6.09e-05	0.000158819	down	-2.21788	Promoter (<=1kb)	2	7673721	7674400	680	2	FBgn0033208	FBtr0088942	114
lncRNA:CR45749	chr3L	13088120	13088122	3	*	lncRNA:CR45749	49605	1	0	1	7.04e-06	3.91e-05	down	-2.21594	Promoter (<=1kb)	3	13087491	13088588	1098	1	FBgn0267313	FBtr0346568	629
Hr39	chr2L	21237159	21237297	139	*	Hr39	15971	2	0	2	7.57e-07	1.17e-05	down	-2.2159	Promoter (<=1kb)	1	21237250	21256186	18937	1	FBgn0261239	FBtr0081478	0
bib	chr2L	9984761	9984763	3	*	bib	7847	1	0	1	4.18e-07	8.6e-06	down	-2.2155	Promoter (<=1kb)	1	9983671	9984743	1073	2	FBgn0040965	FBtr0344476	-18
CG1309	chr3L	4259531	4259538	8	*	CG1309	42746	2	0	2	0.000295808	0.000543319	down	-2.21541	Promoter (<=1kb)	3	4259430	4261643	2214	1	FBgn0035519	FBtr0073229	101
na	chrX	14267030	14267032	3	*	na	98491	1	0	1	1.03e-05	4.89e-05	down	-2.21535	Promoter (<=1kb)	6	14266367	14277416	11050	1	FBgn0002917	FBtr0344822	663
Tlk	chrX	3748069	3748071	3	*	Tlk	91566	1	0	1	4.44e-07	8.85e-06	down	-2.21451	Promoter (<=1kb)	6	3747163	3786636	39474	1	FBgn0283657	FBtr0112680	906
asRNA:CR45925	chr2R	19396416	19396529	114	*	asRNA:CR45925	34424	2	0	2	2.4e-07	6.39e-06	down	-2.21366	Promoter (<=1kb)	2	19396500	19396849	350	1	FBgn0267587	FBtr0347018	0
cer	chr2R	19396416	19396529	114	*	cer	34424	2	0	2	2.4e-07	6.39e-06	down	-2.21366	Promoter (<=1kb)	2	19396500	19396849	350	1	FBgn0267587	FBtr0347018	0
Obp99c	chr3R	29685863	29685865	3	*	Obp99c	85693	1	0	1	4.08e-06	2.83e-05	down	-2.21362	Promoter (<=1kb)	4	29685736	29686784	1049	2	FBgn0039682	FBtr0085463	919
PIG-A	chr2R	17739377	17739379	3	*	PIG-A	33162	1	0	1	3.45e-05	0.000106219	down	-2.21171	Promoter (<=1kb)	2	17737622	17739685	2064	2	FBgn0034270	FBtr0340278	306
pre-mod(mdg4)-AD	chr3R	21365929	21365931	3	*	pre-mod(mdg4)-AD	79123	1	0	1	1.79e-07	5.44e-06	down	-2.21119	Promoter (<=1kb)	4	21366004	21366338	335	1	FBgn0002781	FBtr0084084	-73
pre-mod(mdg4)-AE	chr3R	21365929	21365931	3	*	pre-mod(mdg4)-AE	79123	1	0	1	1.79e-07	5.44e-06	down	-2.21119	Promoter (<=1kb)	4	21366004	21366338	335	1	FBgn0002781	FBtr0084084	-73
pre-mod(mdg4)-U	chr3R	21365929	21365931	3	*	pre-mod(mdg4)-U	79123	1	0	1	1.79e-07	5.44e-06	down	-2.21119	Promoter (<=1kb)	4	21366004	21366338	335	1	FBgn0002781	FBtr0084084	-73
pre-mod(mdg4)-V	chr3R	21365929	21365931	3	*	pre-mod(mdg4)-V	79123	1	0	1	1.79e-07	5.44e-06	down	-2.21119	Promoter (<=1kb)	4	21366004	21366338	335	1	FBgn0002781	FBtr0084084	-73
pre-mod(mdg4)-W	chr3R	21365929	21365931	3	*	pre-mod(mdg4)-W	79123	1	0	1	1.79e-07	5.44e-06	down	-2.21119	Promoter (<=1kb)	4	21366004	21366338	335	1	FBgn0002781	FBtr0084084	-73
pre-mod(mdg4)-X	chr3R	21365929	21365931	3	*	pre-mod(mdg4)-X	79123	1	0	1	1.79e-07	5.44e-06	down	-2.21119	Promoter (<=1kb)	4	21366004	21366338	335	1	FBgn0002781	FBtr0084084	-73
pre-mod(mdg4)-Y	chr3R	21365929	21365931	3	*	pre-mod(mdg4)-Y	79123	1	0	1	1.79e-07	5.44e-06	down	-2.21119	Promoter (<=1kb)	4	21366004	21366338	335	1	FBgn0002781	FBtr0084084	-73
spdo	chr3R	30476961	30476963	3	*	spdo	86343	1	0	1	7.84e-07	1.2e-05	down	-2.21007	Promoter (<=1kb)	4	30476684	30478849	2166	1	FBgn0260440	FBtr0085651	277
CG5466	chr3R	20617959	20617961	3	*	CG5466	78461	1	0	1	9.39e-08	3.85e-06	down	-2.20962	Promoter (<=1kb)	4	20617883	20621269	3387	1	FBgn0038815	FBtr0083913	76
fz	chr3L	14325900	14325902	3	*	fz	50455	1	0	1	3.47e-08	2.27e-06	down	-2.20853	Promoter (<=1kb)	3	14322552	14326251	3700	2	FBgn0266383	FBtr0344868	349
lncRNA:CR45025	chr3L	14325900	14325902	3	*	lncRNA:CR45025	50455	1	0	1	3.47e-08	2.27e-06	down	-2.20853	Promoter (<=1kb)	3	14322552	14326251	3700	2	FBgn0266383	FBtr0344868	349
lncRNA:CR44131	chr2R	6069653	6069655	3	*	lncRNA:CR44131	23560	1	0	1	2.34e-05	8.21e-05	down	-2.20836	Promoter (<=1kb)	2	6068795	6069795	1001	1	FBgn0264980	FBtr0335287	858
APC4	chrX	9083139	9083141	3	*	APC4	95067	1	0	1	1.04e-06	1.38e-05	down	-2.20823	Promoter (<=1kb)	6	9082937	9085867	2931	1	FBgn0052707	FBtr0309872	202
CG14805	chrX	1877419	1877570	152	*	CG14805	90234	2	0	2	2.11e-05	7.67e-05	down	-2.208	Promoter (<=1kb)	6	1877317	1879077	1761	1	FBgn0023514	FBtr0070312	102
bru2	chr2L	12365967	12365969	3	*	bru2	9650	1	0	1	0.00516465	0.00618321	down	-2.20764	Promoter (<=1kb)	1	12366366	12397528	31163	1	FBgn0262475	FBtr0304861	-397
CNBP	chr2R	22934952	22935069	118	*	CNBP	37221	3	0	3	1.01e-05	4.82e-05	down	-2.20734	Promoter (<=1kb)	2	22932035	22934077	2043	2	FBgn0034800	FBtr0303465	-875
CG4882	chr2R	23882860	23882982	123	*	CG4882	38036	3	0	3	1.12e-07	4.19e-06	down	-2.20705	Promoter (<=1kb)	2	23880817	23882927	2111	2	FBgn0025336	FBtr0343290	0
CIAPIN1	chr2L	15038514	15038516	3	*	CIAPIN1	11576	1	0	1	9.45e-06	4.64e-05	down	-2.20687	Promoter (<=1kb)	1	15036293	15038861	2569	2	FBgn0001977	FBtr0080725	345
asRNA:CR45190	chr3R	31588681	31588683	3	*	asRNA:CR45190	87332	1	0	1	2.81e-08	2.02e-06	down	-2.20639	Promoter (<=1kb)	4	31588673	31590392	1720	1	FBgn0039854	FBtr0085796	8
CG1635	chr3R	31588681	31588683	3	*	CG1635	87332	1	0	1	2.81e-08	2.02e-06	down	-2.20639	Promoter (<=1kb)	4	31588673	31590392	1720	1	FBgn0039854	FBtr0085796	8
Tis11	chrX	12664699	12664701	3	*	Tis11	97426	1	0	1	1.18e-07	4.33e-06	down	-2.20635	Promoter (<=1kb)	6	12665217	12665268	52	1	FBgn0283559	FBtr0445483	-516
CG3500	chr2R	23357070	23357244	175	*	CG3500	37597	3	0	3	3.66e-06	2.66e-05	down	-2.20621	Promoter (<=1kb)	2	23356372	23357391	1020	2	FBgn0034849	FBtr0329860	147
nuf	chr3L	14191373	14191375	3	*	nuf	50379	1	0	1	2.42e-07	6.42e-06	down	-2.20582	Promoter (<=1kb)	3	14190873	14233250	42378	1	FBgn0013718	FBtr0100039	500
CG9170	chrX	15982492	15982494	3	*	CG9170	99698	1	0	1	3.49e-07	7.86e-06	down	-2.2055	Promoter (<=1kb)	6	15977967	15982944	4978	2	FBgn0030716	FBtr0346191	450
E(bx)	chr3L	246322	246468	147	*	E(bx)	39419	3	0	3	1.37e-05	5.86e-05	down	-2.20463	Promoter (<=1kb)	3	233926	246912	12987	2	FBgn0000541	FBtr0072521	444
dnc	chrX	3176837	3177015	179	*	dnc	91254	2	0	2	4.78e-07	9.2e-06	down	-2.2043	Promoter (<=1kb)	6	3176440	3343767	167328	1	FBgn0000479	FBtr0333317	397
Crk	chr4	211150	211152	3	*	Crk	87870	1	0	1	6.23e-08	3.07e-06	down	-2.20372	Promoter (<=1kb)	5	210224	213165	2942	1	FBgn0024811	FBtr0345065	926
Dop1R1	chr3R	14214080	14214082	3	*	Dop1R1	73250	1	0	1	1.09e-06	1.41e-05	down	-2.20301	Promoter (<=1kb)	4	14165379	14214810	49432	2	FBgn0011582	FBtr0308191	728
CG13773	chr2L	6907784	6907841	58	*	CG13773	5357	2	0	2	6.62e-05	0.000168531	down	-2.20264	Promoter (<=1kb)	1	6906666	6907844	1179	2	FBgn0042092	FBtr0079372	3
CrebA	chr3L	15535881	15535883	3	*	CrebA	51356	1	0	1	2e-08	1.68e-06	down	-2.20237	Promoter (<=1kb)	3	15535395	15553214	17820	1	FBgn0004396	FBtr0075558	486
Fum1	chrX	6678476	6678478	3	*	Fum1	93459	1	0	1	2.43e-07	6.44e-06	down	-2.20223	Promoter (<=1kb)	6	6678424	6681845	3422	1	FBgn0286222	FBtr0070953	52
ND-ASHI	chrX	6678476	6678478	3	*	ND-ASHI	93459	1	0	1	2.43e-07	6.44e-06	down	-2.20223	Promoter (<=1kb)	6	6678424	6681845	3422	1	FBgn0286222	FBtr0070953	52
otk	chr2R	12019227	12019229	3	*	otk	28557	1	0	1	2.5e-08	1.92e-06	down	-2.2018	Promoter (<=1kb)	2	12001473	12019846	18374	2	FBgn0004839	FBtr0088028	617
mamo	chrX	13989309	13989311	3	*	mamo	98301	1	0	1	3.12e-08	2.16e-06	down	-2.20162	Promoter (<=1kb)	6	13882854	13988831	105978	2	FBgn0267033	FBtr0346007	-478
meru	chr3L	15843872	15843874	3	*	meru	51585	1	0	1	2.25e-05	7.99e-05	down	-2.20148	Promoter (<=1kb)	3	15837773	15843747	5975	2	FBgn0052150	FBtr0306853	-125
aurA	chr3R	11963194	11963196	3	*	aurA	71533	1	0	1	1.22e-06	1.49e-05	down	-2.20029	Promoter (<=1kb)	4	11963124	11964826	1703	1	FBgn0000147	FBtr0082483	70
asRNA:CR45146	chr2R	17698035	17698128	94	*	asRNA:CR45146	33122	2	0	2	1.36e-05	5.82e-05	down	-2.19942	Promoter (<=1kb)	2	17695776	17698362	2587	2	FBgn0027872	FBtr0086888	234
rdgBbeta	chr2R	17698035	17698128	94	*	rdgBbeta	33122	2	0	2	1.36e-05	5.82e-05	down	-2.19942	Promoter (<=1kb)	2	17695776	17698362	2587	2	FBgn0027872	FBtr0086888	234
cnk	chr2R	17419486	17419488	3	*	cnk	32845	1	0	1	1.8e-06	1.82e-05	down	-2.19933	Promoter (<=1kb)	2	17413970	17419588	5619	2	FBgn0286070	FBtr0086962	100
Flo2	chrX	14839489	14839491	3	*	Flo2	98789	1	0	1	8.33e-07	1.24e-05	down	-2.19932	Promoter (<=1kb)	6	14839376	14933946	94571	1	FBgn0264078	FBtr0330215	113
Cnx99A	chr3R	29319519	29319521	3	*	Cnx99A	85415	1	0	1	9.02e-08	3.78e-06	down	-2.19929	Promoter (<=1kb)	4	29315254	29319598	4345	2	FBgn0015622	FBtr0085438	77
CG31407	chr3R	10023604	10023681	78	*	CG31407	70000	2	0	2	1.07e-06	1.4e-05	down	-2.19889	Promoter (<=1kb)	4	10022845	10023608	764	2	FBgn0051407	FBtr0082214	0
Nop60B	chr2R	24175057	24175140	84	*	Nop60B	38355	2	0	2	0.000129268	0.0002811	down	-2.19819	Promoter (<=1kb)	2	24174877	24186343	11467	1	FBgn0259937	FBtr0304599	180
Phf5a	chr2L	6490548	6490589	42	*	Phf5a	5010	2	0	2	3.27e-07	7.61e-06	down	-2.19794	Promoter (<=1kb)	1	6490155	6490843	689	2	FBgn0031822	FBtr0079264	254
CG12868	chr2R	14604711	14604866	156	*	CG12868	30618	2	0	2	1.81e-07	5.47e-06	down	-2.19764	Promoter (<=1kb)	2	14602004	14604337	2334	2	FBgn0003742	FBtr0089621	-374
kat80	chrX	16275535	16275808	274	*	kat80	99877	3	0	3	5.89e-05	0.000155117	down	-2.19734	Promoter (<=1kb)	6	16267007	16275917	8911	2	FBgn0040207	FBtr0074247	109
PI31	chr2R	11969217	11969219	3	*	PI31	28508	1	0	1	0.000100987	0.000232471	down	-2.19707	Promoter (<=1kb)	2	11967343	11968850	1508	2	FBgn0033669	FBtr0310159	-367
app	chr3L	12245542	12245544	3	*	app	48916	1	0	1	3.15e-05	9.98e-05	down	-2.19698	Promoter (<=1kb)	3	12245510	12246048	539	2	FBgn0264723	FBtr0344637	504
lncRNA:CR43991	chr3L	12245542	12245544	3	*	lncRNA:CR43991	48916	1	0	1	3.15e-05	9.98e-05	down	-2.19698	Promoter (<=1kb)	3	12245510	12246048	539	2	FBgn0264723	FBtr0344637	504
MED8	chr2R	20326634	20326902	269	*	MED8	35147	3	0	3	3.35e-06	2.54e-05	down	-2.19657	Promoter (<=1kb)	2	20325844	20326806	963	2	FBgn0034503	FBtr0086297	0
COX7C	chr2R	10048568	10048570	3	*	COX7C	27028	1	0	1	2.96e-09	7.91e-07	down	-2.19574	Promoter (<=1kb)	2	10034595	10048619	14025	2	FBgn0033476	FBtr0345630	49
oys	chr2R	10048568	10048570	3	*	oys	27028	1	0	1	2.96e-09	7.91e-07	down	-2.19574	Promoter (<=1kb)	2	10034595	10048619	14025	2	FBgn0033476	FBtr0345630	49
CG9934	chr2L	13018638	13018640	3	*	CG9934	10108	1	0	1	5.95e-05	0.000156065	down	-2.19552	Promoter (<=1kb)	1	13013388	13019147	5760	2	FBgn0032467	FBtr0301247	507
insv	chr2L	2576599	2576664	66	*	insv	1936	2	0	2	2.41e-07	6.41e-06	down	-2.19535	Promoter (<=1kb)	1	2575280	2576678	1399	2	FBgn0031434	FBtr0344854	14
Tsp39D	chr2L	21345323	21345325	3	*	Tsp39D	16061	1	0	1	2.34e-05	8.22e-05	down	-2.19527	Promoter (<=1kb)	1	21344607	21358271	13665	1	FBgn0032943	FBtr0273404	716
CG9849	chr2R	22937905	22938042	138	*	CG9849	37224	3	0	3	0.000103205	0.00023632	down	-2.19517	Promoter (<=1kb)	2	22937776	22939025	1250	1	FBgn0034803	FBtr0302895	129
Use1	chr3L	9136960	9136962	3	*	Use1	46539	1	0	1	3.42e-06	2.56e-05	down	-2.19508	Promoter (<=1kb)	3	9135709	9137181	1473	2	FBgn0035965	FBtr0076537	219
beat-Vc	chr3R	12766718	12766822	105	*	beat-Vc	72175	2	0	2	4.47e-06	2.98e-05	down	-2.19325	Promoter (<=1kb)	4	12767178	12767468	291	2	FBgn0265164	FBtr0337086	646
EMC1	chr3R	7907143	7907261	119	*	EMC1	68355	2	0	2	1.98e-05	7.39e-05	down	-2.19249	Promoter (<=1kb)	4	7907333	7909721	2389	1	FBgn0024909	FBtr0081756	-72
asRNA:CR43730	chr2R	16291450	16291452	3	*	asRNA:CR43730	32002	1	0	1	0.000655328	0.00104717	down	-2.19247	Promoter (<=1kb)	2	16291453	16292269	817	1	FBgn0050100	FBtr0087140	-1
DENR	chrX	16886276	16886360	85	*	DENR	100391	2	0	2	4.37e-06	2.95e-05	down	-2.19231	Promoter (<=1kb)	6	16885546	16886528	983	2	FBgn0030802	FBtr0074347	168
Rcp	chrX	16886276	16886360	85	*	Rcp	100391	2	0	2	4.37e-06	2.95e-05	down	-2.19231	Promoter (<=1kb)	6	16885546	16886528	983	2	FBgn0030802	FBtr0074347	168
EcR	chr2R	6131218	6131226	9	*	EcR	23596	2	0	2	1.16e-06	1.46e-05	down	-2.19217	Promoter (<=1kb)	2	6087873	6131841	43969	2	FBgn0000546	FBtr0302439	615
Snm1	chr3R	5555104	5555106	3	*	Snm1	66556	1	0	1	0.000166985	0.000343109	down	-2.19211	Promoter (<=1kb)	4	5555084	5557786	2703	1	FBgn0037338	FBtr0078688	20
CG43707	chr2L	3757709	3757711	3	*	CG43707	2841	1	0	1	9.55e-08	3.89e-06	down	-2.19197	Promoter (<=1kb)	1	3757256	3769525	12270	1	FBgn0263846	FBtr0321307	453
CG15343	chrX	8273632	8273634	3	*	CG15343	94562	1	0	1	5.39e-05	0.000145384	down	-2.19186	Promoter (<=1kb)	6	8272324	8273806	1483	2	FBgn0030029	FBtr0071178	172
CG1636	chrX	8273632	8273634	3	*	CG1636	94562	1	0	1	5.39e-05	0.000145384	down	-2.19186	Promoter (<=1kb)	6	8272324	8273806	1483	2	FBgn0030029	FBtr0071178	172
CG33203	chr3R	28886863	28887086	224	*	CG33203	85010	3	0	3	4.77e-06	3.11e-05	down	-2.19174	Promoter (<=1kb)	4	28870606	28887709	17104	2	FBgn0053203	FBtr0301017	623
Rpn8	chr2R	24403257	24403259	3	*	Rpn8	38516	1	0	1	1.18e-06	1.48e-05	down	-2.1916	Promoter (<=1kb)	2	24403005	24404527	1523	1	FBgn0002787	FBtr0330237	252
Pal1	chr2R	9959161	9959784	624	*	Pal1	26961	5	0	5	2.42e-05	8.39e-05	down	-2.19147	Promoter (<=1kb)	2	9959549	9963853	4305	1	FBgn0283510	FBtr0088385	0
Pdrg1	chr2R	9959161	9959784	624	*	Pdrg1	26961	5	0	5	2.42e-05	8.39e-05	down	-2.19147	Promoter (<=1kb)	2	9959549	9963853	4305	1	FBgn0283510	FBtr0088385	0
UQCR-11	chr3L	25121121	25121179	59	*	UQCR-11	59459	2	0	2	0.000254794	0.000481094	down	-2.18965	Promoter (<=1kb)	3	25120749	25126171	5423	1	FBgn0260008	FBtr0343636	372
CG30033	chr2R	11292950	11292952	3	*	CG30033	27933	1	0	1	0.000253387	0.000478934	down	-2.18937	Promoter (<=1kb)	2	11290994	11293174	2181	2	FBgn0015582	FBtr0088176	222
dare	chr2R	11292950	11292952	3	*	dare	27933	1	0	1	0.000253387	0.000478934	down	-2.18937	Promoter (<=1kb)	2	11290994	11293174	2181	2	FBgn0015582	FBtr0088176	222
Grip128	chrX	15472062	15472064	3	*	Grip128	99243	1	0	1	7.95e-06	4.2e-05	down	-2.18885	Promoter (<=1kb)	6	15468281	15472119	3839	2	FBgn0026433	FBtr0074075	55
CG3907	chr2R	24022271	24022410	140	*	CG3907	38202	2	0	2	2.3e-05	8.13e-05	down	-2.18838	Promoter (<=1kb)	2	24019898	24022298	2401	2	FBgn0034958	FBtr0072195	0
Xxylt	chr2R	24022271	24022410	140	*	Xxylt	38202	2	0	2	2.3e-05	8.13e-05	down	-2.18838	Promoter (<=1kb)	2	24019898	24022298	2401	2	FBgn0034958	FBtr0072195	0
Sec61beta	chr2R	14618994	14619038	45	*	Sec61beta	30635	2	0	2	2.51e-05	8.61e-05	down	-2.18823	Promoter (<=1kb)	2	14618771	14619681	911	1	FBgn0010638	FBtr0087498	223
Xpc	chr2R	15311941	15311943	3	*	Xpc	31138	1	0	1	0.000344496	0.00061523	down	-2.18759	Promoter (<=1kb)	2	15311510	15318239	6730	1	FBgn0004698	FBtr0087373	431
CG9899	chr2R	23154372	23154374	3	*	CG9899	37419	1	0	1	3.48e-07	7.85e-06	down	-2.18674	Promoter (<=1kb)	2	23153854	23162077	8224	1	FBgn0034829	FBtr0071969	518
CG18265	chr3L	17445580	17445582	3	*	CG18265	52942	1	0	1	1.29e-07	4.58e-06	down	-2.18528	Promoter (<=1kb)	3	17446549	17455283	8735	1	FBgn0036725	FBtr0333689	-967
prt	chr3R	23698835	23698837	3	*	prt	81127	1	0	1	7.72e-07	1.19e-05	down	-2.18511	Promoter (<=1kb)	4	23696372	23699027	2656	2	FBgn0043005	FBtr0113347	190
COX5A	chr3R	11819483	11819607	125	*	COX5A	71450	2	0	2	4.04e-05	0.000118408	down	-2.1851	Promoter (<=1kb)	4	11819599	11820299	701	1	FBgn0019624	FBtr0082474	0
unc-13	chr4	893979	893981	3	*	unc-13	88448	1	0	1	2.68e-08	1.97e-06	down	-2.18503	Promoter (<=1kb)	5	870930	893565	22636	2	FBgn0025726	FBtr0308806	-414
spir	chr2L	20342118	20342382	265	*	spir	15321	3	0	3	2.66e-05	8.94e-05	down	-2.18497	Promoter (<=1kb)	1	20341851	20348386	6536	1	FBgn0003475	FBtr0081355	267
asRNA:CR44989	chr2L	7220597	7220599	3	*	asRNA:CR44989	5617	1	0	1	0.000373224	0.000656966	down	-2.18461	Promoter (<=1kb)	1	7220567	7221093	527	1	FBgn0266324	FBtr0344055	30
mEFG1	chr2L	7220597	7220599	3	*	mEFG1	5617	1	0	1	0.000373224	0.000656966	down	-2.18461	Promoter (<=1kb)	1	7220567	7221093	527	1	FBgn0266324	FBtr0344055	30
vib	chr3R	19226512	19226514	3	*	vib	77383	1	0	1	1.95e-05	7.32e-05	down	-2.18387	Promoter (<=1kb)	4	19215434	19226558	11125	2	FBgn0267975	FBtr0344554	44
Ama	chr3R	6762911	6762913	3	*	Ama	67516	1	0	1	4.66e-06	3.06e-05	down	-2.18308	Promoter (<=1kb)	4	6761513	6762619	1107	2	FBgn0267153	FBtr0346240	-292
CG30016	chr2R	10875135	10875137	3	*	CG30016	27681	1	0	1	1.66e-06	1.75e-05	down	-2.18255	Promoter (<=1kb)	2	10874892	10875392	501	2	FBgn0050016	FBtr0088241	255
tll	chr3R	30852581	30852583	3	*	tll	86667	1	0	1	1.59e-08	1.52e-06	down	-2.18248	Promoter (<=1kb)	4	30852315	30854400	2086	1	FBgn0003720	FBtr0085709	266
Amyrel	chr2R	16651862	16651864	3	*	Amyrel	32304	1	0	1	2.09e-05	7.62e-05	down	-2.18245	Promoter (<=1kb)	2	16651095	16652699	1605	2	FBgn0020506	FBtr0087117	835
CG17078	chr2L	276797	276799	3	*	CG17078	202	1	0	1	0.000116214	0.00025897	down	-2.18208	Promoter (<=1kb)	1	274740	277212	2473	2	FBgn0086855	FBtr0300804	413
CG3860	chr2R	23994955	23994957	3	*	CG3860	38161	1	0	1	5.47e-06	3.36e-05	down	-2.18176	Promoter (<=1kb)	2	23992138	23995055	2918	2	FBgn0034951	FBtr0072201	98
Spt6	chrX	6268260	6268262	3	*	Spt6	93210	1	0	1	8.81e-05	0.000209555	down	-2.18099	Promoter (<=1kb)	6	6267797	6274984	7188	1	FBgn0028982	FBtr0070896	463
CG45086	chr2R	12612901	12612903	3	*	CG45086	29138	1	0	1	9.39e-05	0.000219828	down	-2.18017	Promoter (<=1kb)	2	12612740	12619820	7081	1	FBgn0266487	FBtr0344532	161
Galphaq	chr2R	12612901	12612903	3	*	Galphaq	29138	1	0	1	9.39e-05	0.000219828	down	-2.18017	Promoter (<=1kb)	2	12612740	12619820	7081	1	FBgn0266487	FBtr0344532	161
svr	chrX	508807	508809	3	*	svr	89143	1	0	1	1.59e-06	1.72e-05	down	-2.17994	Promoter (<=1kb)	6	509435	528028	18594	1	FBgn0023535	FBtr0070088	-626
KCNQ	chr2R	10158096	10158098	3	*	KCNQ	27153	1	0	1	2.59e-06	2.2e-05	down	-2.17978	Promoter (<=1kb)	2	10155916	10158584	2669	2	FBgn0265512	FBtr0331945	486
mlt	chr2R	10158096	10158098	3	*	mlt	27153	1	0	1	2.59e-06	2.2e-05	down	-2.17978	Promoter (<=1kb)	2	10155916	10158584	2669	2	FBgn0265512	FBtr0331945	486
lncRNA:CR44468	chr2R	18805901	18805903	3	*	lncRNA:CR44468	33986	1	0	1	0.00190569	0.00258667	down	-2.17952	Promoter (<=1kb)	2	18805595	18807195	1601	1	FBgn0265661	FBtr0340529	306
CG1968	chr2R	9286887	9286889	3	*	CG1968	26388	1	0	1	1.11e-08	1.27e-06	down	-2.17906	Promoter (<=1kb)	2	9286827	9289026	2200	1	FBgn0033401	FBtr0088596	60
muc	chr2L	7427123	7427265	143	*	muc	5821	2	0	2	1.33e-05	5.73e-05	down	-2.17834	Promoter (<=1kb)	1	7427002	7430329	3328	1	FBgn0283658	FBtr0332529	121
Dh44	chr3R	9640474	9640476	3	*	Dh44	69678	1	0	1	6.29e-07	1.07e-05	down	-2.17782	Promoter (<=1kb)	4	9640552	9650706	10155	1	FBgn0012344	FBtr0344343	-76
asRNA:CR44840	chrX	13054276	13054278	3	*	asRNA:CR44840	97684	1	0	1	4.5e-06	3e-05	down	-2.17775	Promoter (<=1kb)	6	13054218	13054689	472	1	FBgn0266114	FBtr0343601	58
CG12715	chrX	13054276	13054278	3	*	CG12715	97684	1	0	1	4.5e-06	3e-05	down	-2.17775	Promoter (<=1kb)	6	13054218	13054689	472	1	FBgn0266114	FBtr0343601	58
RpS3A	chr4	66531	66635	105	*	RpS3A	87764	2	0	2	1.39e-05	5.9e-05	down	-2.17775	Promoter (<=1kb)	5	65225	67207	1983	2	FBgn0017545	FBtr0308296	572
lncRNA:CR44392	chr2L	16888848	16888850	3	*	lncRNA:CR44392	12981	1	0	1	0.00172076	0.00237073	down	-2.17761	Promoter (<=1kb)	1	16888507	16889530	1024	1	FBgn0265542	FBtr0340174	341
tweek	chr2L	16888848	16888850	3	*	tweek	12981	1	0	1	0.00172076	0.00237073	down	-2.17761	Promoter (<=1kb)	1	16888507	16889530	1024	1	FBgn0265542	FBtr0340174	341
Ag5r	chrX	14786491	14786493	3	*	Ag5r	98757	1	0	1	0.000200007	0.000396145	down	-2.17739	Promoter (<=1kb)	6	14784664	14786551	1888	2	FBgn0015010	FBtr0333658	58
lncRNA:CR45522	chrX	14786491	14786493	3	*	lncRNA:CR45522	98757	1	0	1	0.000200007	0.000396145	down	-2.17739	Promoter (<=1kb)	6	14784664	14786551	1888	2	FBgn0015010	FBtr0333658	58
CG1703	chrX	11612095	11612097	3	*	CG1703	96742	1	0	1	1.77e-06	1.81e-05	down	-2.17726	Promoter (<=1kb)	6	11612016	11615128	3113	1	FBgn0030321	FBtr0073520	79
Rab3-GEF	chrX	15096772	15096774	3	*	Rab3-GEF	98973	1	0	1	5.85e-07	1.02e-05	down	-2.17722	Promoter (<=1kb)	6	15095458	15096042	585	2	FBgn0030614	FBtr0074029	-730
Saf-B	chr3R	24817600	24817662	63	*	Saf-B	82102	2	0	2	4.61e-06	3.04e-05	down	-2.17581	Promoter (<=1kb)	4	24817464	24822350	4887	1	FBgn0039229	FBtr0392912	136
Sra-1	chr3R	15333531	15333533	3	*	Sra-1	74138	1	0	1	1.32e-05	5.71e-05	down	-2.17561	Promoter (<=1kb)	4	15333266	15338365	5100	1	FBgn0038320	FBtr0083085	265
CG11226	chr3L	22837326	22837328	3	*	CG11226	57129	1	0	1	9.67e-06	4.7e-05	down	-2.17544	Promoter (<=1kb)	3	22836555	22837070	516	2	FBgn0266977	FBtr0345874	-256
lncRNA:CR45963	chr3L	22345439	22345441	3	*	lncRNA:CR45963	56836	1	0	1	8.66e-08	3.7e-06	down	-2.17494	Promoter (<=1kb)	3	22345383	22346236	854	1	FBgn0267625	FBtr0347075	56
Dp1	chr2R	18412636	18412638	3	*	Dp1	33662	1	0	1	6.93e-08	3.25e-06	down	-2.17454	Promoter (<=1kb)	2	18412848	18420742	7895	1	FBgn0027835	FBtr0086680	-210
imd	chr2R	18412636	18412638	3	*	imd	33662	1	0	1	6.93e-08	3.25e-06	down	-2.17454	Promoter (<=1kb)	2	18412848	18420742	7895	1	FBgn0027835	FBtr0086680	-210
CG6426	chr2R	16869410	16869412	3	*	CG6426	32479	1	0	1	6.63e-06	3.77e-05	down	-2.17438	Promoter (<=1kb)	2	16869402	16871851	2450	1	FBgn0034162	FBtr0087042	8
CG3262	chr2L	22239947	22239949	3	*	CG3262	16854	1	0	1	5.56e-06	3.4e-05	down	-2.17407	Promoter (<=1kb)	1	22239916	22246988	7073	1	FBgn0032986	FBtr0334168	31
ci	chr4	56357	56494	138	*	ci	87757	2	0	2	1.08e-05	5.06e-05	down	-2.17402	Promoter (<=1kb)	5	56497	60974	4478	1	FBgn0264617	FBtr0333704	-3
Sgs8	chr3L	11509129	11509131	3	*	Sgs8	48263	1	0	1	6.36e-06	3.68e-05	down	-2.17306	Promoter (<=1kb)	3	11508967	11509394	428	2	FBgn0003378	FBtr0076160	263
CG17726	chr3R	11226821	11226823	3	*	CG17726	70938	1	0	1	1.28e-06	1.53e-05	down	-2.173	Promoter (<=1kb)	4	11226762	11228227	1466	1	FBgn0037880	FBtr0082352	59
Cpr62Ba	chr3L	1828493	1828495	3	*	Cpr62Ba	40822	1	0	1	0.00123002	0.00177995	down	-2.17295	Promoter (<=1kb)	3	1824129	1828942	4814	2	FBgn0035279	FBtr0299561	447
lncRNA:CR44657	chrX	14114337	14114339	3	*	lncRNA:CR44657	98357	1	0	1	3.69e-07	8.08e-06	down	-2.17244	Promoter (<=1kb)	6	14114141	14116889	2749	1	FBgn0265868	FBtr0342713	196
CG9330	chr3L	19586370	19586372	3	*	CG9330	54540	1	0	1	2.75e-06	2.27e-05	down	-2.17132	Promoter (<=1kb)	3	19586253	19589111	2859	1	FBgn0036888	FBtr0074940	117
CG31743	chr2L	16879799	16879801	3	*	CG31743	12973	1	0	1	0.0149845	0.0161412	down	-2.17026	Promoter (<=1kb)	1	16879517	16886319	6803	1	FBgn0085342	FBtr0112511	282
CG34313	chr2L	16879799	16879801	3	*	CG34313	12973	1	0	1	0.0149845	0.0161412	down	-2.17026	Promoter (<=1kb)	1	16879517	16886319	6803	1	FBgn0085342	FBtr0112511	282
sbr	chrX	10846892	10846894	3	*	sbr	96194	1	0	1	6.32e-07	1.07e-05	down	-2.17016	Promoter (<=1kb)	6	10832752	10847092	14341	2	FBgn0003321	FBtr0073411	198
Rpn13	chr2R	13960190	13960192	3	*	Rpn13	30178	1	0	1	3.61e-05	0.000109694	down	-2.16992	Promoter (<=1kb)	2	13958545	13960208	1664	2	FBgn0033886	FBtr0114495	16
alpha-Man-IIa	chr3R	9412583	9412585	3	*	alpha-Man-IIa	69492	1	0	1	0.000129691	0.000281824	down	-2.16866	Promoter (<=1kb)	4	9412548	9417264	4717	1	FBgn0011740	FBtr0334302	35
CG3603	chrX	2948838	2948962	125	*	CG3603	91122	2	0	2	0.000543332	0.000894946	down	-2.16861	Promoter (<=1kb)	6	2948034	2949120	1087	1	FBgn0029648	FBtr0332493	804
CG33939	chrX	19174812	19174814	3	*	CG33939	102011	1	0	1	0.00725642	0.00837652	down	-2.16844	Promoter (<=1kb)	6	19171077	19174900	3824	2	FBgn0047095	FBtr0347285	86
dmGlut	chr2L	12027542	12027544	3	*	dmGlut	9445	1	0	1	0.000439491	0.000751234	down	-2.16842	Promoter (<=1kb)	1	12027438	12034122	6685	1	FBgn0010497	FBtr0080292	104
CG15019	chr3L	4405584	4405586	3	*	CG15019	42872	1	0	1	9.99e-05	0.0002307	down	-2.16807	Promoter (<=1kb)	3	4405127	4406059	933	2	FBgn0035541	FBtr0113139	473
E(spl)m4-BFM	chr3R	26024296	26024580	285	*	E(spl)m4-BFM	83053	4	0	4	4.98e-05	0.000137329	down	-2.16729	Promoter (<=1kb)	4	26023821	26024579	759	2	FBgn0002629	FBtr0084980	0
dlp	chr3L	14662486	14662645	160	*	dlp	50697	2	0	2	2.74e-07	6.92e-06	down	-2.16723	Promoter (<=1kb)	3	14661455	14661946	492	2	FBgn0267548	FBtr0346931	-540
alpha-PheRS	chrX	8144926	8144928	3	*	alpha-PheRS	94466	1	0	1	7.29e-05	0.000181313	down	-2.16662	Promoter (<=1kb)	6	8143904	8145602	1699	2	FBgn0030007	FBtr0071190	674
prominin-like	chr3L	3127634	3127678	45	*	prominin-like	41784	2	0	2	1.67e-08	1.55e-06	down	-2.16655	Promoter (<=1kb)	3	3114450	3127724	13275	2	FBgn0026189	FBtr0306258	46
CG6700	chr2L	10841232	10841234	3	*	CG6700	8499	1	0	1	0.00772548	0.0088622	down	-2.16567	Promoter (<=1kb)	1	10840345	10840476	132	2	FBgn0263560	FBtr0309697	-756
CG44362	chr3L	11397576	11397578	3	*	CG44362	48171	1	0	1	4.09e-08	2.46e-06	down	-2.16544	Promoter (<=1kb)	3	11397542	11397865	324	1	FBgn0265469	FBtr0339928	34
CG6118	chr3R	15421255	15421365	111	*	CG6118	74197	2	0	2	4.78e-06	3.11e-05	down	-2.1652	Promoter (<=1kb)	4	15417320	15420710	3391	2	FBgn0267571	FBtr0346983	-545
CG12355	chr3L	15493904	15493906	3	*	CG12355	51302	1	0	1	3.23e-06	2.48e-05	down	-2.1646	Promoter (<=1kb)	3	15492964	15494277	1314	2	FBgn0040805	FBtr0075606	371
CG31086	chr3R	26186181	26186183	3	*	CG31086	83191	1	0	1	9.25e-07	1.3e-05	down	-2.16453	Promoter (<=1kb)	4	26185630	26186227	598	1	FBgn0051086	FBtr0084989	551
CG31323	chr3R	26186181	26186183	3	*	CG31323	83191	1	0	1	9.25e-07	1.3e-05	down	-2.16453	Promoter (<=1kb)	4	26185630	26186227	598	1	FBgn0051086	FBtr0084989	551
CG5144	chr3L	9048313	9048462	150	*	CG5144	46466	2	0	2	1.88e-06	1.87e-05	down	-2.16413	Promoter (<=1kb)	3	9047439	9048724	1286	1	FBgn0035957	FBtr0076523	874
CG14270	chrX	3485305	3485307	3	*	CG14270	91445	1	0	1	3.27e-05	0.000102407	down	-2.16351	Promoter (<=1kb)	6	3484605	3485378	774	2	FBgn0029665	FBtr0070590	71
lncRNA:CR44999	chrX	3485305	3485307	3	*	lncRNA:CR44999	91445	1	0	1	3.27e-05	0.000102407	down	-2.16351	Promoter (<=1kb)	6	3484605	3485378	774	2	FBgn0029665	FBtr0070590	71
BuGZ	chr2L	16743791	16743793	3	*	BuGZ	12814	1	0	1	0.000318172	0.000576589	down	-2.16334	Promoter (<=1kb)	1	16743405	16753704	10300	1	FBgn0032600	FBtr0329945	386
aux	chr3R	4221824	4222064	241	*	aux	65418	3	2	1	1.02e-05	4.85e-05	down	-2.16282	Promoter (<=1kb)	4	4220986	4227518	6533	1	FBgn0037218	FBtr0336706	838
snoRNA:Me18S-A425	chr3R	11222920	11223160	241	*	snoRNA:Me18S-A425	70931	3	0	3	2.53e-06	2.18e-05	down	-2.1627	Promoter (<=1kb)	4	11222414	11223029	616	2	FBgn0051144	FBtr0303864	0
Atac3	chr3L	327960	327962	3	*	Atac3	39500	1	0	1	2.81e-08	2.02e-06	down	-2.16267	Promoter (<=1kb)	3	324985	327992	3008	2	FBgn0052343	FBtr0299831	30
qkr54B	chr2R	17470699	17470701	3	*	qkr54B	32895	1	0	1	0.002214	0.00294325	down	-2.16262	Promoter (<=1kb)	2	17469746	17473357	3612	1	FBgn0022987	FBtr0086925	953
CG9416	chr2R	19372567	19372569	3	*	CG9416	34393	1	0	1	0.000393248	0.000685658	down	-2.16177	Promoter (<=1kb)	2	19367248	19373243	5996	2	FBgn0034438	FBtr0086555	674
GlcT	chr2R	22076107	22076123	17	*	GlcT	36491	3	0	3	2.76e-06	2.28e-05	down	-2.16177	Promoter (<=1kb)	2	22075988	22079381	3394	1	FBgn0067102	FBtr0071755	119
sdt	chrX	8179335	8179511	177	*	sdt	94497	2	0	2	9.91e-08	3.94e-06	down	-2.16152	Promoter (<=1kb)	6	8178553	8239427	60875	1	FBgn0261873	FBtr0308220	782
Dref	chr2L	9964479	9964481	3	*	Dref	7841	1	0	1	1.62e-05	6.52e-05	down	-2.16101	Promoter (<=1kb)	1	9960450	9963949	3500	2	FBgn0032172	FBtr0303901	-530
[truncated: 503 more rows]

## Sheet: RNAseq Norm.counts for CG4577 
Samples	spar Normalized Read Count	condition
w1118 Replicate 1	2800.5	w1118
w1118 Replicate 2	2094.1	w1118
w1118 Replicate 3	2372.69	w1118
AlkRA Replicate 1	1121.06	AlkRA
AlkRA Replicate 2	1567.2	AlkRA
AlkRA Replicate 3	1565.77	AlkRA
AlkY1355S Replicate 1	3795.55	AlkY1355S
AlkY1355S Replicate 2	4466.05	AlkY1355S
AlkY1355S Replicate 3	3822.39	AlkY1355S

## Sheet: Circadian neurons RNAseq data
spar Average expression (normalized reads)
LNv	LNd	DN1
1358.88	270.065	171.874

## Sheet: SpardeltaExon1
Mutant	SgRNA target sequence used:	deletion size
sparΔExon1	SgRNA 1 Target: GCGTTACTGCCAGGTCGCATCGG	716bp
	SgRNA 2 target: ACGCCCACTCTTAAGGCTAAAGG
Mutant	CRISPR screening primers
sparΔExon1	Forward primer: caagtgaggcaattagccagaat
	Reverse primer: aacgagatgagctccgagatgg
