# Supplementary figures and images for: The Alk receptor tyrosine kinase regulates Sparkly, a novel activity regulating neuropeptide precursor in the Drosophila central nervous system
Source: eLife journal article supplement (doi:10.7554/elife.88985), 2023-08-31

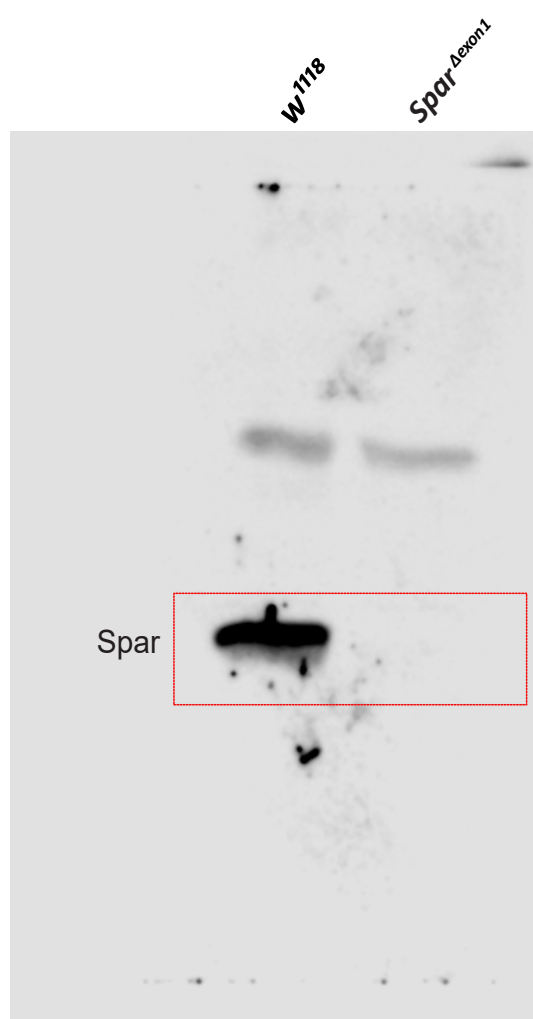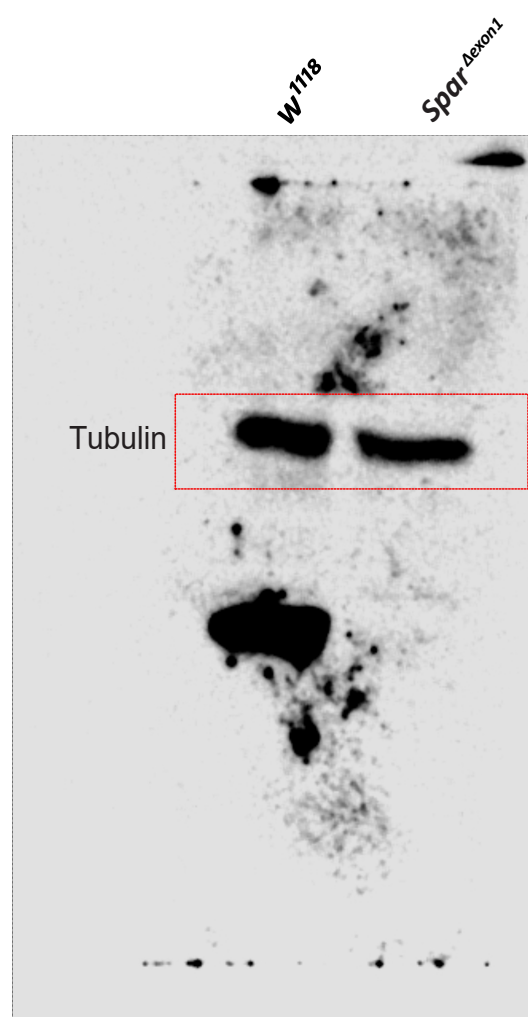

Supplement: fig7-data1 [file elife-88985-fig7-data1-v1.zip]
